# Supplementary material for: Synthesis of benzoxazoles via the copper-catalyzed hydroamination of alkynones with 2-aminophenols
Source: Royal Society of Chemistry journal article supplement (doi:10.1039/c9ob00572b), 2019-01-01

## *Supporting Information*

# **Synthesis of Benzoxazoles via the Copper-Catalyzed Hydroamination of Alkynones with 2-Aminophenols**

Kohei Oshimoto, Hiroaki Tsuji\* and Motoi Kawatsura\*

Department of Chemistry, College of Humanities & Sciences, Nihon University,  
Sakurajosui, Setagaya-ku, Tokyo 156-8550, Japan

tsuji@chs.nihon-u.ac.jp

kawatsur@chs.nihon-u.ac.jp

## **Table of Contents**

|                                                                                                                                 |          |
|---------------------------------------------------------------------------------------------------------------------------------|----------|
| 1. General experimental remarks                                                                                                 | S2       |
| 2. General procedure for the preparation of alkynones                                                                           | S2–S13   |
| 3. General procedure for the preparation of 2-aminophenol derivatives                                                           | S13–S15  |
| 4. General procedure for the synthesis of benzoxazoles via the copper-catalyzed hydroamination of alkynones with 2-aminophenols | S15–S25  |
| 5. Preliminary mechanistic experiments                                                                                          | S25–S26  |
| 6. References                                                                                                                   | S27–S28  |
| 7. Copies of NMR spectra ( $^1\text{H}$ , $^{13}\text{C}$ , and $^{19}\text{F}$ )                                               | S29–S125 |

## General experimental remarks

Commercially available chemicals were purchased from Aldrich, TCI, Kanto, and Wako and used without further purification unless otherwise noted. Trifluoromethyl group-containing alkyne **1** was prepared according to the reported procedures.<sup>1</sup> NMR spectra were recorded at 25 °C on a JEOL EX-270 spectrometer (270 MHz for <sup>1</sup>H, 67.8 MHz for <sup>13</sup>C) or a JEOL JNM ECP-500 spectrometer (126 MHz for <sup>13</sup>C, 471 MHz for <sup>19</sup>F). Chemical shifts are reported in  $\delta$  ppm referenced to an internal tetramethylsilane (0 ppm) for <sup>1</sup>H NMR. Chemical shifts of <sup>13</sup>C NMR are given relative to the solvent peak as an internal standard. <sup>19</sup>F NMR data are reported relative to external  $\alpha,\alpha,\alpha$ -trifluorotoluene (−63.7 ppm). Multiplicities are indicated as br (broad), s (singlet), d (doublet), t (triplet), q (quartet), or m (multiplet). Coupling constants (*J*) are reported in Hertz (Hz). Melting points were measured on a Yanako MP-500P. Infrared (IR) spectra were recorded on JASCO FT/IR-4100. HRMS analyses were carried out using a JEOL AccuTOF LCplus for APCI-MS and ESI-MS and JEOL GCmate for EI-MS. Column chromatography and preparative thin-layer chromatography were conducted with silica gel 60N (KANTO CHEMICAL, spherical, neutral, 40-50 or 63-210  $\mu$ m) and Wakogel<sup>®</sup> B-5F (45  $\mu$ m), respectively. For thin-layer chromatography (TLC) analyses throughout this work, Merck precoated TLC plates (silica gel 60 F254 0.25 mm) were used. Visualization was accomplished by UV light (254 nm), phosphomolybdic acid, and anisaldehyde.

## General procedure for the preparation of alkynones

### Scheme S1. Preparation of alkynones **4a**, **4b**, **4e**, **4g**, **4h**, **4k**, **4o**, **4p**, **4q**:

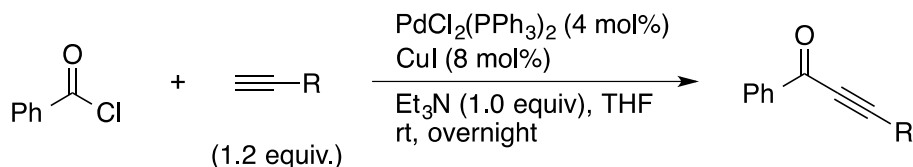

### Preparation of 1,3-Diphenylprop-2-yn-1-one (**4a**)<sup>2</sup>

PdCl<sub>2</sub>(PPh<sub>3</sub>)<sub>2</sub> (140 mg, 0.200 mmol) and CuI (76.2 mg, 0.400 mmol) were charged into a two-necked round flask and the flask was refilled with N<sub>2</sub>. THF (17.0 mL) was added to the flask. Benzoyl chloride (703 mg, 5.00 mmol), phenyl acetylene (613 mg, 6.00 mmol), and triethylamine (506 mg, 5.00 mmol) were added to the mixture at room temperature. The reaction mixture was stirred at room temperature overnight.

Saturated  $\text{NH}_4\text{Cl}$  solution was added to the mixture and the resulting aqueous phase was extracted with EtOAc. The combined organic phase was washed with brine, dried over  $\text{MgSO}_4$ . After removal of the solvent, the resulting crude mixture was purified by silica gel column chromatography (Hexane/EtOAc = 45/1) to give 1,3-diphenylprop-2-yn-1-one (**4a**) as a pale yellow solid (1.02 g, 4.95 mmol, 98% yield).

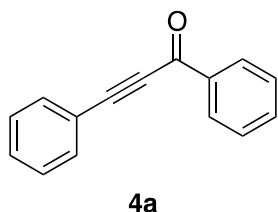

$^1\text{H}$  NMR (270 MHz,  $\text{CDCl}_3$ ):  $\delta$  7.39–7.56 (m, 5H), 7.61–7.72 (m, 3H), 8.21–8.26 (m, 2H);  $^{13}\text{C}$  NMR (67.8 MHz,  $\text{CDCl}_3$ ):  $\delta$  86.8, 93.1, 120.1, 128.6 (2C), 129.5, 130.8, 133.0, 134.1, 136.8, 178.0; GC-MS (EI):  $m/z$  206  $[\text{M}]^+$ .

#### 1-Phenyl-3-(*p*-tolyl)prop-2-yn-1-one (**4b**)<sup>3</sup>

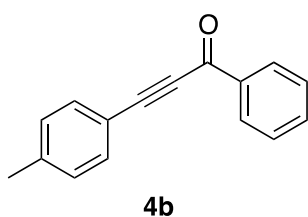

This compound was prepared according to the similar method to **4a** and the desired product was obtained after purification by silica gel column chromatography (Hexane/EtOAc = 19/1). The resulting material was further purified by recrystallization from hot ethanol to give the desired product as a slightly brown solid (881 mg, 4.00 mmol, 79% yield);  $^1\text{H}$  NMR (270 MHz,  $\text{CDCl}_3$ ):  $\delta$  2.41 (s, 3H), 7.22–7.26 (m, 2H), 7.49–7.67 (m, 5H), 8.21–8.25 (m, 2H);  $^{13}\text{C}$  NMR (67.8 MHz,  $\text{CDCl}_3$ ):  $\delta$  21.7, 86.7, 93.8, 117.0, 128.6, 129.5 (2C), 133.1, 134.0, 136.9, 141.5, 178.0; GC-MS (EI):  $m/z$  220  $[\text{M}]^+$ .

#### 1-Phenyl-3-(4-(trifluoromethyl)phenyl)prop-2-yn-1-one (**4e**)<sup>4</sup>

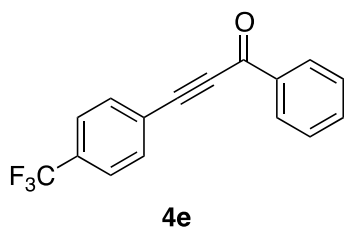

This compound was prepared according to the similar method to **4a** and the desired product was obtained after purification by silica gel column chromatography (Hexane/EtOAc = 45/1). Pale yellow solid (1.10 g, 3.99 mmol, 78% yield);  $^1\text{H}$  NMR (500 MHz,  $\text{CDCl}_3$ ):  $\delta$  7.53–7.56 (m, 2H), 7.65–7.70 (m, 3H), 7.80 (d,  $J$  = 8.0 Hz, 2H), 8.22 (dd,  $J$  = 8.3, 1.3 Hz, 2H);  $^{13}\text{C}$  NMR (126 MHz,  $\text{CDCl}_3$ ):  $\delta$  88.1, 90.5, 123.6 (q,  $J_{\text{CF}}$  = 273 Hz), 124.0, 125.7 (q,  $J_{\text{CF}}$  = 4.0 Hz), 128.8, 129.7, 132.3 (q,  $J_{\text{CF}}$  = 33 Hz), 133.2, 134.5, 136.6, 177.7;  $^{19}\text{F}$  NMR (471 MHz,  $\text{CDCl}_3$ ):  $\delta$  –64.1 (s); GC-MS (EI):  $m/z$  274  $[\text{M}]^+$ .

### 3-(4-Fluorophenyl)-1-phenylprop-2-yn-1-one (**4g**)<sup>3</sup>

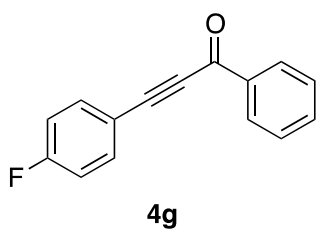

This compound was prepared according to the similar method to **4a** and the desired product was obtained after purification by silica gel column chromatography (Hexane/EtOAc = 45/1). Slightly brown solid (311 mg, 1.39 mmol, 46% yield); <sup>1</sup>H NMR (500 MHz, CDCl<sub>3</sub>): δ 7.10–7.15 (m, 2H), 7.51–7.54 (m, 2H), 7.62–7.71 (m, 3H), 8.20–8.22 (m, 2H); <sup>13</sup>C NMR (126 MHz, CDCl<sub>3</sub>): δ 86.8, 91.9, 116.2 (d, *J*<sub>CF</sub> = 3.7 Hz), 116.2 (d, *J*<sub>CF</sub> = 21.5 Hz), 128.6, 129.5, 134.2, 135.3 (d, *J*<sub>CF</sub> = 8.4 Hz), 136.8, 164.0 (d, *J*<sub>CF</sub> = 254 Hz), 177.8; <sup>19</sup>F NMR (471 MHz, CDCl<sub>3</sub>): δ –106.97– –107.03 (m); GC-MS (EI): *m/z* 224 [M]<sup>+</sup>.

### 3-(4-Bromophenyl)-1-phenylprop-2-yn-1-one (**4h**)<sup>5, 6</sup>

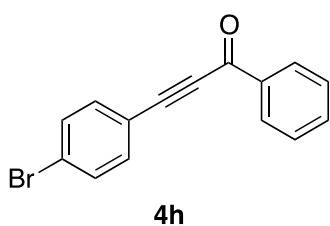

This compound was prepared according to the similar method to **4a** and the desired product was obtained after purification by silica gel column chromatography (Hexane/EtOAc = 97/3). Pale yellow solid (628 mg, 2.20 mmol, 73% yield); <sup>1</sup>H NMR (270 MHz, CDCl<sub>3</sub>): δ 7.50–7.68 (m, 7H), 8.19–8.23 (m, 2H); <sup>13</sup>C NMR (67.8 MHz, CDCl<sub>3</sub>): δ 87.7, 91.6, 119.0, 125.6, 128.7, 129.6, 132.1, 134.3 (2C), 136.7, 177.8; GC-MS (EI): *m/z* 284 [M]<sup>+</sup>.

### 1-Phenyl-3-(*m*-tolyl)prop-2-yn-1-one (**4k**)<sup>7</sup>

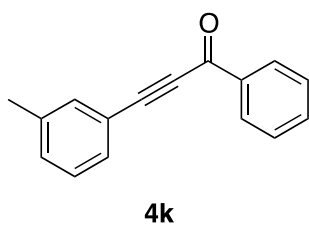

This compound was prepared according to the similar method to **4a** and the desired product was obtained after purification by silica gel column chromatography (Hexane/EtOAc = 97/3). Brown solid (575 mg, 2.61 mmol, 87% yield); <sup>1</sup>H NMR (270 MHz, CDCl<sub>3</sub>): δ 2.38 (s, 3H), 7.25–7.34 (m, 2H), 7.49–7.65 (m, 5H), 8.21–8.24 (m, 2H); <sup>13</sup>C NMR (67.8 MHz, CDCl<sub>3</sub>): δ 21.1, 86.6, 93.4, 119.8, 128.5 (2C), 129.5, 130.2, 131.7, 133.5, 134.0, 136.9, 138.4, 178.0; GC-MS (EI): *m/z* 220 [M]<sup>+</sup>.

### 3-(Naphthalen-1-yl)-1-phenylprop-2-yn-1-one (**4o**)<sup>8</sup>

This compound was prepared according to the similar method to **4a** and the desired product was obtained after purification by silica gel column chromatography

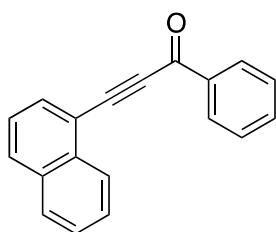

**4o**

(Hexane/EtOAc = 97/3). Slightly brown solid (425 mg, 1.66 mmol, 55% yield);  $^1\text{H}$  NMR (270 MHz,  $\text{CDCl}_3$ ):  $\delta$  7.47–7.68 (m, 6H), 7.88–7.98 (m, 3H), 8.29–8.33 (m, 2H), 8.42 (d,  $J$  = 7.6 Hz, 1H);  $^{13}\text{C}$  NMR (67.8 MHz,  $\text{CDCl}_3$ ):  $\delta$  91.4, 91.6, 117.7, 125.2, 125.8, 126.9, 127.7, 128.6, 128.7, 129.6, 131.5, 133.1, 133.2, 133.6, 134.1, 137.0, 178.0; GC-MS (EI):  $m/z$  256  $[\text{M}]^+$ .

#### 1-Phenyl-3-(thiophen-2-yl)prop-2-yn-1-one (**4p**)<sup>9</sup>

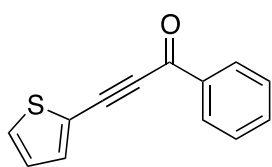

**4p**

This compound was prepared according to the similar method to **4a** and the desired product was obtained after purification by silica gel column chromatography (Hexane/EtOAc = 19/1). Brown solid (403 mg, 1.90 mmol, 92% yield);  $^1\text{H}$  NMR (270 MHz,  $\text{CDCl}_3$ ):  $\delta$  7.09–7.12 (m, 1H), 7.49–7.66 (m, 5H), 8.17–8.21 (m, 2H);  $^{13}\text{C}$  NMR (67.8 MHz,  $\text{CDCl}_3$ ):  $\delta$  87.0, 91.6, 119.8, 127.7, 128.6, 129.4, 131.7, 134.1, 136.6, 136.7, 177.5; GC-MS (EI):  $m/z$  212  $[\text{M}]^+$ .

#### 3-Cyclohexyl-1-phenylprop-2-yn-1-one (**4q**)<sup>10</sup>

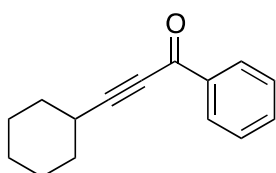

**4q**

This compound was prepared according to the similar method to **4a** and the desired product was obtained after purification by silica gel column chromatography (Hexane/EtOAc = 97/3). Brown oil (481 mg, 2.23 mmol, 75% yield);  $^1\text{H}$  NMR (270 MHz,  $\text{CDCl}_3$ ):  $\delta$  1.33–1.44 (m, 3H), 1.50–1.67 (m, 3H), 1.70–1.79 (m, 2H), 1.87–1.92 (m, 2H), 2.67 (m, 1H), 7.42–7.48 (m, 2H), 7.54–7.60 (m, 1H), 8.12–8.16 (m, 2H);  $^{13}\text{C}$  NMR (67.8 MHz,  $\text{CDCl}_3$ ):  $\delta$  24.4, 25.3, 29.0, 31.4, 79.3, 100.0, 128.2, 129.2, 133.5, 136.7, 177.9; GC-MS (EI):  $m/z$  212  $[\text{M}]^+$ .

#### 1,5-Diphenylpent-2-yn-1-one (**4r**)

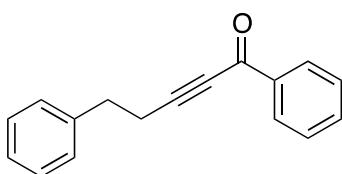

**4r**

This compound was prepared according to the similar method to **4a** and the desired product was obtained after purification by silica gel column chromatography (Hexane/EtOAc = 97/3). Slightly brown oil (627 mg, 2.67 mmol, 89% yield); IR (neat) 3062, 3028, 2931, 2233, 2200, 1641, 1597, 1496, 1450, 849, 796, 748, 700  $\text{cm}^{-1}$ ;  $^1\text{H}$  NMR (500 MHz,  $\text{CDCl}_3$ ):

$\delta$  2.80 (t,  $J$  = 7.1 Hz, 2H), 2.97 (t,  $J$  = 7.1 Hz, 2H), 7.23–7.27 (m, 3H), 7.31–7.34 (m, 2H), 7.40 (dd,  $J$  = 8.0, 8.0 Hz, 2H), 7.54–7.57 (m, 1H), 7.97–7.99 (m, 2H);  $^{13}\text{C}$  NMR (67.8 MHz,  $\text{CDCl}_3$ ):  $\delta$  21.1, 33.7, 80.1, 95.3, 126.5, 128.3 (2C), 128.4, 129.4, 133.7, 136.6, 139.5, 177.9; HRMS (APCI)  $[\text{M}+\text{H}]^+$  Calcd for  $\text{C}_{17}\text{H}_{15}\text{O}$  235.1123; Found 235.1124.

**Scheme S2. Preparation of alkynones 4d, 4c, 4f, 4i, 4j, 4l, 4m, 4n, 4r:**

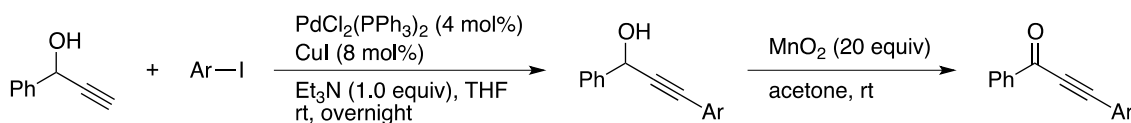

**3-(4-Methoxyphenyl)-1-phenylprop-2-yn-1-ol (4d')**

$\text{PdCl}_2(\text{PPh}_3)_2$  (84.2 mg, 0.12 mmol) and  $\text{CuI}$  (45.7 mg, 0.24 mmol) were charged into a two-necked round flask and the flask was refilled with  $\text{N}_2$ . THF (10 mL) was added to the flask. 4-Iodoanisole (702 mg, 3.00 mmol), 1-Phenyl-2-propyn-1-ol (476 mg, 3.60 mmol), and triethylamine (304 mg, 3.00 mmol) were added to the mixture at room temperature. The reaction mixture was stirred at room temperature overnight. Saturated  $\text{NH}_4\text{Cl}$  solution was added to the mixture and the resulting aqueous phase was extracted with  $\text{EtOAc}$ . The combined organic phase was washed with brine, dried over  $\text{MgSO}_4$ . After removal of the solvent, the resulting crude mixture was purified by silica gel column chromatography (Hexane/ $\text{EtOAc}$  = 9/1) to give 3-(4-methoxyphenyl)-1-phenylprop-2-yn-1-ol (**4d'**) as a brown oil (406 mg, 1.70 mmol, 56% yield).

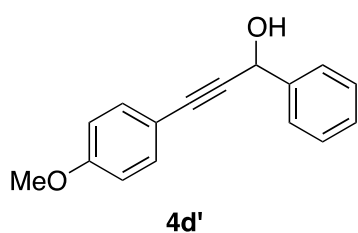

IR (neat) 3417, 3062, 3033, 2935, 2837, 2191, 1604, 1570, 1510, 1107, 833, 762, 700  $\text{cm}^{-1}$ ;  $^1\text{H}$  NMR (270 MHz,  $\text{CDCl}_3$ ):  $\delta$  2.31 (d,  $J$  = 6.2 Hz, 1H), 3.81 (s, 3H), 5.68 (d,  $J$  = 6.2 Hz, 1H), 6.82–6.87 (m, 2H), 7.31–7.44 (m, 5H), 7.59–7.64 (m, 2H);  $^{13}\text{C}$  NMR (67.8 MHz,  $\text{CDCl}_3$ ):  $\delta$  55.3, 65.2, 86.6, 87.3, 113.9, 114.5, 126.7, 128.4, 128.6, 133.2, 140.8, 159.8; HRMS (EI)  $[\text{M}]^+$  Calcd for  $\text{C}_{16}\text{H}_{14}\text{O}_2$  238.0994; Found 238.0992.

**3-(4-(*tert*-Butyl)phenyl)-1-phenylprop-2-yn-1-ol (4c')**

This compound was prepared according to the similar method to **4d'** and the desired product was obtained after purification by silica gel column chromatography

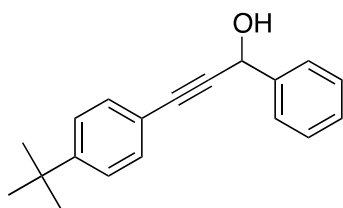

**4c'**

(Hexane/EtOAc = 9/1). Brown oil (429 mg, 1.62 mmol, 99% yield); IR (neat) 3438, 3062, 2868, 2197, 1643, 1504, 1363, 756, 698  $\text{cm}^{-1}$ ;  $^1\text{H}$  NMR (270 MHz,  $\text{CDCl}_3$ ):  $\delta$  1.31 (s, 9H), 2.28 (d,  $J$  = 5.8 Hz, 1H), 5.69 (d,  $J$  = 5.8 Hz, 1H), 7.26–7.44 (m, 7H), 7.61–7.64 (m, 2H);  $^{13}\text{C}$  NMR (67.8 MHz,  $\text{CDCl}_3$ ):  $\delta$  31.1, 34.8, 65.2, 86.8, 88.0, 119.3, 125.3, 126.8, 128.4, 128.6, 131.5, 140.7, 151.9; HRMS (EI)  $[M]^+$  Calcd for  $\text{C}_{19}\text{H}_{20}\text{O}$  264.1514; Found 264.1514.

#### 4-(3-Hydroxy-3-phenylprop-1-yn-1-yl)benzonitrile (**4f'**)

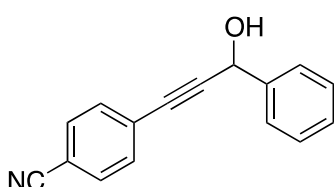

**4f'**

This compound was prepared according to the similar method to **4d'** and the desired product was obtained after purification by silica gel column chromatography (Hexane/EtOAc = 9/1). Brown solid (485 mg, 2.08 mmol, 69% yield); M.p. 62–64 °C; IR (KBr) 3462, 3062, 2918, 2224, 1601, 1498, 835, 764, 694  $\text{cm}^{-1}$ ;  $^1\text{H}$  NMR (270 MHz,  $\text{CDCl}_3$ ):  $\delta$  2.39 (d,  $J$  = 6.1 Hz, 1H), 5.71 (d,  $J$  = 6.1 Hz, 1H), 7.34–7.46 (m, 3H), 7.53–7.63 (m, 6H);  $^{13}\text{C}$  NMR (67.8 MHz,  $\text{CDCl}_3$ ):  $\delta$  65.1, 84.8, 93.1, 112.0, 118.3, 126.6, 127.3, 128.7, 128.8, 132.0, 132.2, 140.0; HRMS (EI)  $[M]^+$  Calcd for  $\text{C}_{16}\text{H}_{11}\text{NO}$  233.0841; Found 233.0839.

#### 1-(4-(3-Hydroxy-3-phenylprop-1-yn-1-yl)phenyl)ethanone (**4i'**)

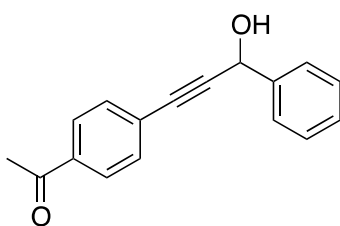

**4i'**

This compound was prepared according to the similar method to **4d'** and the desired product was obtained after purification by silica gel column chromatography (Hexane/EtOAc = 9/1). Brown oil (680 mg, 2.72 mmol, 90% yield); IR (neat) 3460, 3032, 2866, 2202, 1682, 1601, 1554, 1493, 1360, 762, 698  $\text{cm}^{-1}$ ;  $^1\text{H}$  NMR (270 MHz,  $\text{CDCl}_3$ ):  $\delta$  2.56 (s, 3H), 2.96 (brs, 1H), 5.70 (s, 1H), 7.31–7.43 (m, 3H), 7.50 (dd,  $J$  = 6.7, 1.7 Hz, 2H), 7.58–7.61 (m, 2H), 7.86 (dd,  $J$  = 6.7, 1.7 Hz, 2H);  $^{13}\text{C}$  NMR (67.8 MHz,  $\text{CDCl}_3$ ):  $\delta$  26.5, 64.9, 85.5, 92.2, 126.6, 127.3, 128.1, 128.4, 128.6, 131.8, 136.3, 140.3, 197.6; HRMS (EI)  $[M]^+$  Calcd for  $\text{C}_{17}\text{H}_{14}\text{O}_2$  250.0994; Found 250.0994.

Ethyl 4-(3-hydroxy-3-phenylprop-1-yn-1-yl)benzoate (**4j'**)

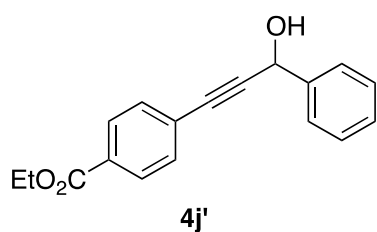

This compound was prepared according to the similar method to **4d'** and the desired product was obtained after purification by silica gel column chromatography (Hexane/EtOAc = 17/3). Slightly brown solid (857 mg, 3.06 mmol, 92% yield); M.p. 51–52 °C; IR (KBr) 3346, 3062, 2989, 2239, 1707, 1606, 1560, 1396, 816, 746  $\text{cm}^{-1}$ ;  $^1\text{H}$  NMR (270 MHz,  $\text{CDCl}_3$ ):  $\delta$  1.39 (t,  $J$  = 7.1 Hz, 3H), 2.43 (d,  $J$  = 6.1 Hz, 1H), 4.37 (q,  $J$  = 7.1 Hz, 2H), 5.71 (d,  $J$  = 6.1 Hz, 1H), 7.33–7.46 (m, 3H), 7.51–7.54 (m, 2H), 7.61 (dd,  $J$  = 8.0, 1.5 Hz, 2H), 7.98–8.01 (m, 2H);  $^{13}\text{C}$  NMR (67.8 MHz,  $\text{CDCl}_3$ ):  $\delta$  14.3, 61.2, 65.1, 85.8, 91.5, 126.7, 126.9, 128.6, 128.7, 129.4, 130.2, 131.6, 140.3, 166.0; HRMS (EI)  $[\text{M}]^+$  Calcd for  $\text{C}_{18}\text{H}_{16}\text{O}_3$  280.1099; Found 280.1101.

3-(3-Methoxyphenyl)-1-phenylprop-2-yn-1-ol (**4l'**)

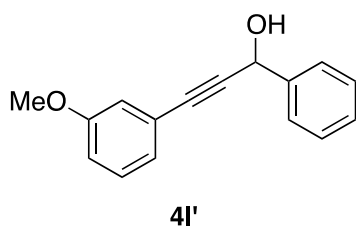

This compound was prepared according to the similar method to **4d'** and the desired product was obtained after purification by silica gel column chromatography (Hexane/EtOAc = 85/15). Brown oil (711 mg, 2.98 mmol, 99% yield); IR (neat) 3417, 3064, 2835, 2195, 1599, 783, 698  $\text{cm}^{-1}$ ;  $^1\text{H}$  NMR (270 MHz,  $\text{CDCl}_3$ ):  $\delta$  2.32 (brs, 1H), 3.79 (s, 3H), 5.69 (s, 1H), 6.87–6.91 (m, 1H), 7.00 (d,  $J$  = 1.4 Hz, 1H), 7.05–7.08 (m, 1H), 7.20–7.26 (m, 1H), 7.35–7.45 (m, 3H), 7.60–7.64 (m, 2H);  $^{13}\text{C}$  NMR (67.8 MHz,  $\text{CDCl}_3$ ):  $\delta$  55.3, 65.1, 86.6, 88.5, 115.2, 116.5, 123.4, 124.3, 126.7, 128.4, 128.7, 129.4, 140.6, 159.3; HRMS (EI)  $[\text{M}]^+$  Calcd for  $\text{C}_{16}\text{H}_{14}\text{O}_2$  238.0994; Found 238.0994.

1-Phenyl-3-(3-(trifluoromethyl)phenyl)prop-2-yn-1-ol (**4m'**)

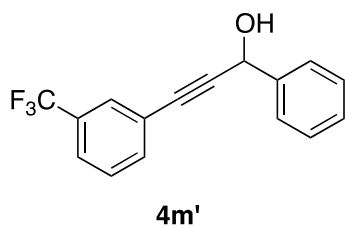

This compound was prepared according to the similar method to **4d'** and the desired product was obtained after purification by silica gel column chromatography (Hexane/EtOAc = 9/1). Slightly brown oil (807 mg, 2.92 mmol, 98% yield); IR (neat) 3381, 3066, 2875, 2208, 1641, 1487, 1433, 1333, 802  $\text{cm}^{-1}$ ;  $^1\text{H}$  NMR (270 MHz,  $\text{CDCl}_3$ ):  $\delta$  2.30 (brs, 1H), 5.69 (s, 1H), 7.33–7.46 (m, 4H), 7.56–7.64 (m, 4H), 7.72 (s, 1H);  $^{13}\text{C}$  NMR (126 MHz,  $\text{CDCl}_3$ ):

$\delta$  65.1, 85.1, 90.3, 123.4, 123.7 (q,  $J_{\text{CF}} = 273$  Hz), 125.2 (q,  $J_{\text{CF}} = 4.0$  Hz), 126.7, 128.6 (q,  $J_{\text{CF}} = 4.0$  Hz), 128.7, 128.8, 128.9, 131.0 (q,  $J_{\text{CF}} = 32.5$  Hz), 134.9, 140.3;  $^{19}\text{F}$  NMR (471 MHz,  $\text{CDCl}_3$ ):  $\delta$  -63.9 (s); HRMS (EI)  $[\text{M}]^+$  Calcd for  $\text{C}_{16}\text{H}_{11}\text{OF}_3$  276.0762; Found 276.0767.

#### 1-Phenyl-3-(*o*-tolyl)prop-2-yn-1-ol (**4n'**)

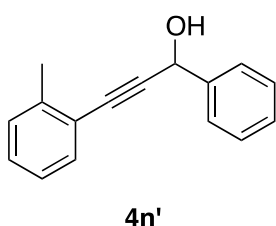

This compound was prepared according to the similar method to **4d'** and the desired product was obtained after purification by silica gel column chromatography (Hexane/EtOAc = 85/15). Brown oil (551 mg, 2.48 mmol, 83% yield); IR (neat) 3363, 3062, 3030, 2920, 2225, 1601, 1487, 1379, 758  $\text{cm}^{-1}$ ;  $^1\text{H}$  NMR (270 MHz,  $\text{CDCl}_3$ ):  $\delta$  2.20 (brs, 1H), 2.44 (s, 3H), 5.73 (s, 1H), 7.11–7.25 (m, 3H), 7.31–7.46 (m, 4H), 7.62–7.65 (m, 2H);  $^{13}\text{C}$  NMR (67.8 MHz,  $\text{CDCl}_3$ ):  $\delta$  20.7, 65.2, 85.6, 92.6, 122.1, 125.5, 126.7, 128.4, 128.6 (2C), 129.4, 132.1, 140.3, 140.8; HRMS (EI)  $[\text{M}]^+$  Calcd for  $\text{C}_{16}\text{H}_{14}\text{O}$  222.1045; Found 222.1043.

#### Preparation of 3-(4-methoxyphenyl)-1-phenylprop-2-yn-1-one (**4d**)<sup>3</sup>

3-(4-Methoxyphenyl)-1-phenylprop-2-yn-1-ol (**4d'**) (233 mg, 0.980 mmol) was charged into a two-necked round flask and the flask was refilled with  $\text{N}_2$ . Acetone (6.6 mL) was added to the flask.  $\text{MnO}_2$  (1.73 g, 19.9 mmol) was added to the mixture under  $\text{N}_2$  and the resulting suspension was stirred at room temperature overnight. The suspension was filtrated with a pad of celite and the filtrate was concentrated *in vacuo*. The resulting crude mixture was purified by silica gel column chromatography (Hexane/EtOAc = 9/1) to give 3-(4-methoxyphenyl)-1-phenylprop-2-yn-1-one (**4d**) as a pale yellow oil (200 mg, 0.846 mmol, 86% yield).

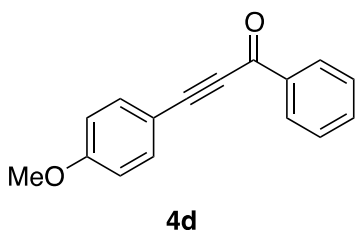

$^1\text{H}$  NMR (270 MHz,  $\text{CDCl}_3$ ):  $\delta$  3.86 (s, 3H), 6.91–6.96 (m, 2H), 7.49–7.54 (m, 2H), 7.59–7.68 (m, 3H), 8.20–8.23 (m, 2H);  $^{13}\text{C}$  NMR (67.8 MHz,  $\text{CDCl}_3$ ):  $\delta$  55.4, 86.9, 94.3, 111.9, 114.4, 128.5, 129.5, 133.9, 135.1, 137.0, 161.7, 178.0; GC-MS (EI):  $m/z$  236  $[\text{M}]^+$ .

3-(4-(*tert*-Butyl)phenyl)-1-phenylprop-2-yn-1-one (**4c**)<sup>3</sup>

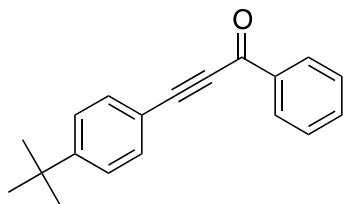

**4c**

This compound was prepared according to the similar method to **4d** and the desired product was obtained after purification by silica gel column chromatography (Hexane/EtOAc = 9/1). Pale yellow oil (370 mg, 1.41 mmol, 87% yield) <sup>1</sup>H NMR (270 MHz, CDCl<sub>3</sub>): δ 1.34 (s, 9H), 7.43–7.55 (m, 4H), 7.60–7.66 (m, 3H), 8.21–8.25 (m, 2H); <sup>13</sup>C NMR (67.8 MHz, CDCl<sub>3</sub>): δ 31.0, 35.1, 86.7, 93.8, 117.0, 125.8, 128.6, 129.6, 133.0, 134.0, 137.0, 154.6, 178.1; GC-MS (EI): *m/z* 262 [M]<sup>+</sup>.

4-(3-Oxo-3-phenylprop-1-yn-1-yl)benzonitrile (**4f**)<sup>11</sup>

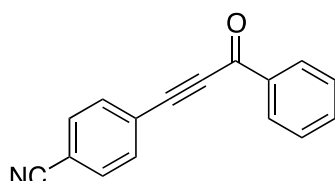

**4f**

This compound was prepared according to the similar method to **4d** and the desired product was obtained after purification by silica gel column chromatography (Hexane/EtOAc = 9/1). Slightly brown solid (70.0 mg, 0.303 mmol, 30% yield); <sup>1</sup>H NMR (500 MHz, CDCl<sub>3</sub>):

δ 7.53–7.56 (m, 2H), 7.65–7.79 (m, 5H), 8.20 (dd, *J* = 8.8, 1.3 Hz, 2H); <sup>13</sup>C NMR (67.8 MHz, CDCl<sub>3</sub>): δ 89.4, 89.6, 114.0, 117.8, 124.9, 128.8, 129.6, 132.3, 133.3, 134.6, 136.4, 177.4; GC-MS (EI): *m/z* 231 [M]<sup>+</sup>.

3-(4-Acetylphenyl)-1-phenylprop-2-yn-1-one (**4i**)<sup>12</sup>

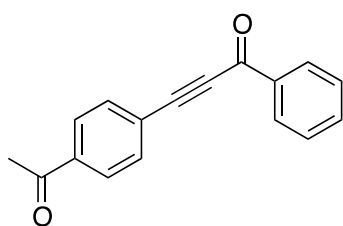

**4i**

This compound was prepared according to the similar method to **4d** and the desired product was obtained after purification by silica gel column chromatography (Hexane/EtOAc = 9/1). White solid (153 mg, 0.615 mmol, 41%); <sup>1</sup>H NMR (270 MHz, CDCl<sub>3</sub>): δ 2.65 (s, 3H), 7.51–7.57 (m, 2H), 7.63–7.70 (m, 1H), 7.78 (dd, *J* = 6.7,

1.7 Hz, 2H), 8.01 (dd, *J* = 6.7, 1.7 Hz, 2H), 8.20–8.24 (m, 2H); <sup>13</sup>C NMR (67.8 MHz, CDCl<sub>3</sub>): δ 26.7, 88.7, 91.1, 124.7, 128.4, 128.7, 129.6, 133.1, 134.4, 136.6, 138.1, 177.7, 197.0; GC-MS (EI): *m/z* 248 [M]<sup>+</sup>.

Ethyl 4-(3-oxo-3-phenylprop-1-yn-1-yl)benzoate (**4j**)<sup>13</sup>

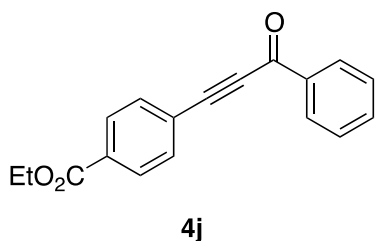

This compound was prepared according to the similar method to **4d** and the desired product was obtained after purification by silica gel column chromatography (Hexane/EtOAc = 9/1). Slightly brown oil (390 mg, 1.40 mmol, 92%); <sup>1</sup>H NMR (270 MHz, CDCl<sub>3</sub>): δ 1.42 (t, *J* = 7.2 Hz, 3H), 4.41 (q, *J* = 7.2 Hz, 2H), 7.51–7.57 (m, 2H), 7.63–7.69 (m, 1H), 7.75 (dd, *J* = 6.6, 1.9 Hz, 2H), 8.10 (dd, *J* = 6.6, 1.9 Hz, 2H), 8.21–8.24 (m, 2H); <sup>13</sup>C NMR (67.8 MHz, CDCl<sub>3</sub>): δ 14.3, 61.4, 88.5, 91.3, 124.5, 128.7, 129.6, 129.7, 132.1, 132.8, 134.4, 136.6, 165.6, 177.7; GC-MS (EI): *m/z* 278 [M]<sup>+</sup>.

3-(3-Methoxyphenyl)-1-phenylprop-2-yn-1-one (**4l**)

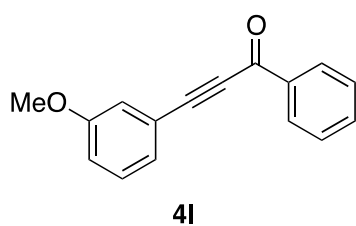

This compound was prepared according to the similar method to **4d** and the desired product was obtained after purification by silica gel column chromatography (Hexane/EtOAc = 9/1). Pale yellow solid (162 mg, 0.687 mmol, 43% yield); M.p. 73–74 °C; IR (neat) 2964, 2195, 1639, 1597, 1579, 1238, 1043, 777, 700 cm<sup>-1</sup>; <sup>1</sup>H NMR (270 MHz, CDCl<sub>3</sub>): δ 3.83 (s, 3H), 7.00–7.05 (m, 1H), 7.18–7.19 (m, 1H), 7.25–7.35 (m, 2H), 7.48–7.55 (m, 2H), 7.59–7.66 (m, 1H), 8.20–8.24 (m, 2H); <sup>13</sup>C NMR (67.8 MHz, CDCl<sub>3</sub>): δ 55.3, 86.5, 92.9, 117.4, 117.5, 120.9, 125.5, 128.5, 129.5, 129.7, 134.1, 136.8, 159.4, 177.9; HRMS (APCI) [M+H]<sup>+</sup> Calcd for C<sub>16</sub>H<sub>13</sub>O<sub>2</sub> 237.0916; Found 237.0916.

1-Phenyl-3-(3-(trifluoromethyl)phenyl)prop-2-yn-1-one (**4m**)

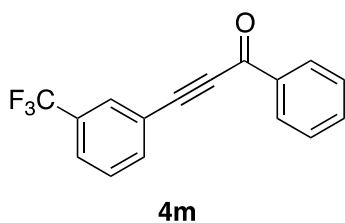

This compound was prepared according to the similar method to **4d** and the desired product was obtained after purification by silica gel column chromatography (Hexane/EtOAc = 9/1). Pale yellow solid (422 mg, 1.54 mmol, 94% yield); M.p. 74–75 °C; IR (neat) 3068, 2208, 1643, 1599, 1333, 1130, 903, 804, 694 cm<sup>-1</sup>; <sup>1</sup>H NMR (270 MHz, CDCl<sub>3</sub>): δ 7.50–7.75 (m, 5H), 7.84–7.86 (m, 1H), 7.92–7.93 (m, 1H), 8.20–8.24 (m, 2H); <sup>13</sup>C NMR (126 MHz, CDCl<sub>3</sub>): δ 87.6, 90.5, 121.2, 123.5 (q, *J*<sub>CF</sub> = 273 Hz), 127.3 (q, *J*<sub>CF</sub> = 3.6 Hz), 128.8, 129.4, 129.7, 129.7 (q, *J*<sub>CF</sub> = 4.2 Hz), 131.5 (q, *J*<sub>CF</sub> = 33.2 Hz), 134.5, 136.1,

136.6, 177.7;  $^{19}\text{F}$  NMR (471 MHz,  $\text{CDCl}_3$ ):  $\delta$  -64.0 (s); HRMS (APCI)  $[\text{M}+\text{H}]^+$  Calcd for  $\text{C}_{16}\text{H}_{10}\text{OF}_3$  275.0684; Found 275.0687.

#### 1-Phenyl-3-(*o*-tolyl)prop-2-yn-1-one (**4n**)<sup>7</sup>

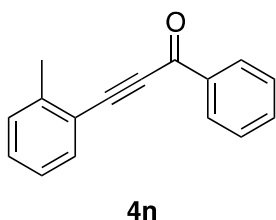

This compound was prepared according to the similar method to **4d** and the desired product was obtained after purification by silica gel column chromatography (Hexane/EtOAc = 9/1). Pale yellow oil (319 mg, 1.45 mmol, 98% yield);  $^1\text{H}$  NMR (270 MHz,  $\text{CDCl}_3$ ):  $\delta$  2.55 (s, 3H), 7.16–7.26 (m, 2H), 7.30–7.36 (m, 1H), 7.45–7.52 (m, 2H), 7.56–7.63 (m, 2H), 8.20–8.25 (m, 2H);  $^{13}\text{C}$  NMR (67.8 MHz,  $\text{CDCl}_3$ ):  $\delta$  20.7, 90.6, 92.0, 119.7, 125.8, 128.4, 129.3, 129.7, 130.7, 133.5, 133.9, 136.8, 141.9, 177.7; GC-MS (EI):  $m/z$  220  $[\text{M}]^+$ .

#### 1-Phenylprop-2-yn-1-one (**4s**)

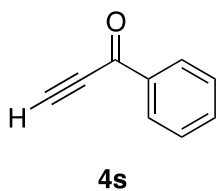

This compound was prepared according to the similar method to **4d** and the desired product was obtained after purification by silica gel column chromatography (Hexane/EtOAc = 9/1). Brown solid (140 mg, 1.08 mmol, 73% yield); M.p. 49–50 °C; IR (KBr) 3232, 3060, 2092, 1643, 1597, 1579, 1489, 700  $\text{cm}^{-1}$ ;  $^1\text{H}$  NMR (270 MHz,  $\text{CDCl}_3$ ):  $\delta$  3.45 (s, 1H), 7.47–7.53 (m, 2H), 7.64 (t,  $J$  = 7.2 Hz, 1H), 8.15–8.18 (m, 2H);  $^{13}\text{C}$  NMR (67.8 MHz,  $\text{CDCl}_3$ ):  $\delta$  80.2, 80.8, 128.7, 129.7, 134.5, 136.1, 177.4; HRMS (EI)  $[\text{M}]^+$  Calcd for  $\text{C}_9\text{H}_6\text{O}$  130.0419; Found 130.0419.

#### Scheme S3. Preparation of alkynone **3**:

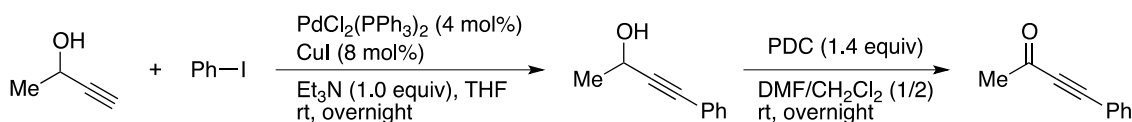

Preparation of 4-phenylbut-3-yn-2-ol (**3'**)<sup>14</sup>: This compound was prepared according to the similar method to **4c'** (Scheme S1) and the desired product was obtained after purification by silica gel column chromatography (Hexane/EtOAc = 9/1).

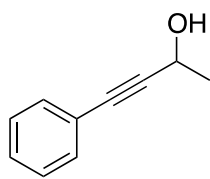

**3'**

Brown oil (2.14 g, 14.6 mmol, 96% yield);  $^1\text{H}$  NMR (270 MHz,  $\text{CDCl}_3$ ):  $\delta$  1.56 (d,  $J = 6.6$  Hz, 3H), 2.02 (brs, 1H), 4.76 (q,  $J = 6.6$  Hz, 1H), 7.28–7.33 (m, 3H), 7.39–7.46 (m, 2H);  $^{13}\text{C}$  NMR (67.8 MHz,  $\text{CDCl}_3$ ):  $\delta$  24.4, 58.8, 84.0, 90.9, 122.5, 128.3, 128.4, 131.6;

GC-MS (EI):  $m/z$  145  $[\text{M}-\text{H}]^+$ .

Preparation of 4-phenylbut-3-yn-2-one (**3**)<sup>2</sup>:

Pyridinium dichromate (2.63g, 7.00 mmol) and DMF (3.3 mL) were charged into a round flask and then DCM (6.6 mL) and silica gel were added to the mixture. 4-Phenylbut-3-yn-2-ol (**3'**) (731 mg, 5.00 mmol) was added dropwise to the mixture at 0 °C. After treatment of the mixture with additional silica gel, the resulting mixture was stirred at room temperature overnight. The reaction mixture was filtrated with a pad of florisil using EtOAc and the filtrate was washed with water and brine. The resulting organic layer was dried over  $\text{MgSO}_4$ . After removal of the solvent, the resulting crude mixture was purified by silica gel column chromatography (Hexane/EtOAc = 9/1) to give 4-phenylbut-3-yn-2-one (**3**) as a pale yellow oil (569 mg, 3.95 mmol, 80% yield).

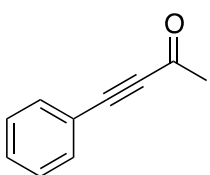

**3**

$^1\text{H}$  NMR (270 MHz,  $\text{CDCl}_3$ ):  $\delta$  2.44 (s, 3H), 7.33–7.48 (m, 3H), 7.54–7.59 (m, 2H);  $^{13}\text{C}$  NMR (67.8 MHz,  $\text{CDCl}_3$ ):  $\delta$  32.6, 88.1, 90.1, 119.7, 128.5, 130.6, 132.9, 184.4; GC-MS (EI):  $m/z$  144  $[\text{M}]^+$ .

### General procedure for the preparation of 2-aminophenol derivatives

#### Scheme S4. Preparation of 2-aminophenols **5f**, **5h**, **5j**, **5k**, **5l**:

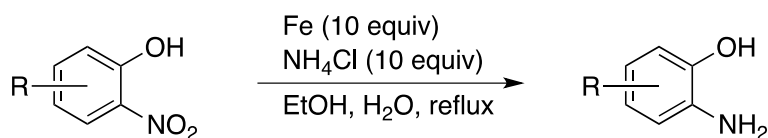

2-Nitro-4-(trifluoromethyl)phenol (622 mg, 3.00 mmol) and EtOH (43 mL) were charged into a round flask. Iron powder (1.68 g, 30.0 mmol) and a solution of  $\text{NH}_4\text{Cl}$  (1.60 g, 30.0 mmol) in  $\text{H}_2\text{O}$  (12 mL) were added to the mixture. The resulting mixture was refluxed for 1 h and then allowed to cool to room temperature. The resulting suspension was filtrated with a pad of celite and the filtrate was concentrated *in vacuo*. The resulting mixture was diluted with EtOAc and then  $\text{H}_2\text{O}$  was added. The aqueous

phase was extracted with EtOAc and the combined organic phase was washed with brine. After removal of the solvent, the crude mixture was purified by silica gel column chromatography (Hexane/EtOAc = 1/1) to give 2-amino-4-(trifluoromethyl)phenol (**5f**) as a white solid (363 mg, 2.05 mmol, 68% yield).

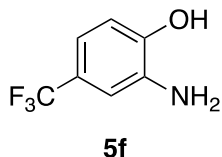

M.p. 122–125 °C; IR (neat) 3383, 2972, 2708, 2630, 1618, 1329, 1113, 897, 822  $\text{cm}^{-1}$ ;  $^1\text{H}$  NMR (270 MHz,  $\text{DMSO}-d_6$ ):  $\delta$  4.95 (brs, 2H), 6.74 (d,  $J = 8.5$  Hz, 1H), 6.80 (d,  $J = 8.5$  Hz, 1H), 6.90 (s, 1H), 9.88 (brs, 1H);  $^{13}\text{C}$  NMR (126 MHz,  $\text{DMSO}-d_6$ ):  $\delta$  110.0 (q,  $J_{\text{CF}} = 3.6$  Hz), 113.2 (q,  $J_{\text{CF}} = 4.0$  Hz), 113.8, 120.2 (q,  $J_{\text{CF}} = 31.2$  Hz), 125.1 (q,  $J_{\text{CF}} = 27.1$  Hz), 137.4, 147.1;  $^{19}\text{F}$  NMR (471 MHz,  $\text{DMSO}-d_6$ ):  $\delta$  -60.7 (s); HRMS (ESI)  $[\text{M}+\text{H}]^+$  Calcd for  $\text{C}_7\text{H}_7\text{F}_3\text{NO}$  178.0480; Found 178.0486.

#### 2-Amino-5-chlorophenol (**5h**)

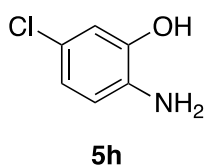

This compound was prepared according to the similar method to **5f** and the desired product was obtained after purification by silica gel column chromatography (Hexane/EtOAc = 1/1). Brown solid (358 mg, 2.49 mmol, 81% yield); M.p. 153–154 °C; IR (neat) 3371, 3298, 2999, 2563, 1599, 1508, 1429, 1267, 1086, 887, 852  $\text{cm}^{-1}$ ;  $^1\text{H}$  NMR (270 MHz,  $\text{DMSO}-d_6$ ):  $\delta$  4.65 (brs, 2H), 6.569–6.574 (m, 2H), 6.66–6.67 (m, 1H), 9.48 (brs, 1H);  $^{13}\text{C}$  NMR (67.8 MHz,  $\text{DMSO}-d_6$ ):  $\delta$  114.0, 114.8, 118.9, 119.0, 135.9, 144.9; HRMS (ESI)  $[\text{M}+\text{H}]^+$  Calcd for  $\text{C}_6\text{H}_7\text{ClNO}$  144.0216; Found 144.0211.

#### 2-Amino-5-bromophenol (**5j**)

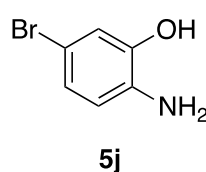

This compound was prepared according to the similar method to **5f** and the desired product was obtained after purification by silica gel column chromatography (Hexane/EtOAc = 1/1). Brown solid (820 mg, 4.36 mmol, 87% yield); M.p. 140–142 °C; IR (neat) 3369, 2991, 2540, 1585, 1500, 1425, 1078, 920, 852  $\text{cm}^{-1}$ ;  $^1\text{H}$  NMR (270 MHz,  $\text{DMSO}-d_6$ ):  $\delta$  4.67 (brs, 2H), 6.53 (dd,  $J = 8.5, 3.1$  Hz, 1H), 6.66–6.71 (m, 1H), 6.77–6.79 (m, 1H), 9.45 (brs, 1H);  $^{13}\text{C}$  NMR (67.8 MHz,  $\text{DMSO}-d_6$ ):  $\delta$  106.1, 115.4, 116.7, 121.9, 136.3, 145.2; HRMS (ESI)  $[\text{M}+\text{H}]^+$  Calcd for  $\text{C}_6\text{H}_7\text{BrNO}$  187.9711; Found 187.9704.

### 2-Amino-4-bromophenol (**5k**)

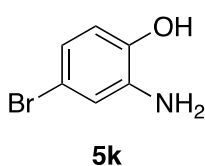

This compound was prepared according to the similar method to **5f** and the desired product was obtained after purification by silica gel column chromatography (Hexane/EtOAc = 1/1). Brown solid (493 mg, 2.62 mmol, 52% yield); M.p. 124–126 °C; IR (neat) 3379, 3307, 3068, 2688, 1589, 1500, 1200, 847, 804 cm<sup>-1</sup>; <sup>1</sup>H NMR (270 MHz, DMSO-*d*<sub>6</sub>): δ 4.80 (brs, 2H), 6.53 (dd, *J* = 8.3, 2.4 Hz, 1H), 6.61 (d, *J* = 8.3 Hz, 1H), 6.76 (d, *J* = 2.4 Hz, 1H), 9.31 (brs, 1H); <sup>13</sup>C NMR (67.8 MHz, DMSO-*d*<sub>6</sub>): δ 110.9, 115.8, 116.3, 118.4, 138.8, 143.4; HRMS (ESI) [M+H]<sup>+</sup> Calcd for C<sub>6</sub>H<sub>7</sub>BrNO 187.9711; Found 187.9706.

### 3-Amino-[1,1'-biphenyl]-4-ol (**5l**)

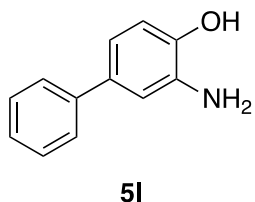

This compound was prepared according to the similar method to **5f** and the desired product was obtained after purification by silica gel column chromatography (Hexane/EtOAc = 1/1). Brown solid (493 mg, 2.62 mmol, 52% yield); M.p. decomp. (201 °C); IR (neat) 3383, 2974, 2708, 2630, 1618, 1527, 1331, 897, 822, 729 cm<sup>-1</sup>; <sup>1</sup>H NMR (270 MHz, DMSO-*d*<sub>6</sub>): δ 4.64 (brs, 2H), 6.70–6.78 (m, 2H), 6.94 (d, *J* = 2.2 Hz, 1H), 7.20–7.26 (m, 1H), 7.37 (dd, *J* = 7.9, 7.6 Hz, 2H), 7.50 (dd, *J* = 7.9, 0.95 Hz, 2H), 9.19 (brs, 1H); <sup>13</sup>C NMR (67.8 MHz, DMSO-*d*<sub>6</sub>): δ 112.7, 114.7, 114.9, 125.9, 126.1, 128.7, 131.7, 136.9, 141.1, 144.0; HRMS (ESI) [M+H]<sup>+</sup> Calcd for C<sub>12</sub>H<sub>12</sub>NO 186.0919; Found 186.0926.

## General procedure for the synthesis of benzoxazoles via the copper-catalyzed hydroamination of alkynones with 2-aminophenols

### Procedure A

Cu(OTf)<sub>2</sub> (5.4 mg, 0.0150 mmol), alkynones **4** (0.300 mmol), and 2-aminophenol **5** (0.360 mmol) were charged into a screw vial and the vial was refilled with N<sub>2</sub>. After the addition of *o*-xylene (0.6 mL), the resulting mixture was stirred at 120 °C for 19 h. The reaction was allowed to cool to room temperature and then quenched with water (1 mL). The aqueous phase was extracted with EtOAc (2 mL × 1). The organic phase was washed with brine (1 mL × 1) and dried over MgSO<sub>4</sub>. After removal of the

solvent, the resulting crude mixture was purified by preparative thin-layer chromatography to give the benzoxazoles **6**.

### Procedure B

Cu(OTf)<sub>2</sub> (5.4 mg, 0.0150 mmol), alkynones **4** (0.300 mmol), and 2-aminophenol **5** (0.360 mmol) were charged into a screw vial and the vial was refilled with N<sub>2</sub>. After the addition of *o*-xylene (0.6 mL), the resulting mixture was stirred at 120 °C for 19 h. The reaction was allowed to cool to room temperature and then a solution of NaBH<sub>4</sub> (13.6 mg, 0.360 mmol) in MeOH (1.5 mL) was added. The resulting mixture was stirred for 15–30 min at room temperature and quenched with water (1 mL). The aqueous phase was extracted with EtOAc (2.5 mL × 1). The organic phase was washed with brine (1 mL × 1) and dried over MgSO<sub>4</sub>. After removal of the solvent, the resulting crude mixture was purified by preparative thin-layer chromatography to give the benzoxazoles **6**.

#### 5-Methyl-2-phenylbenzo[*d*]oxazole (**6aa**)<sup>15</sup>

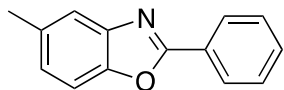

**6aa**

This compound was prepared according to the procedure A and the desired product was obtained after purification by preparative thin-layer chromatography (Hexane/EtOAc = 4/1).

White solid (57.4 mg, 0.274 mmol, 91% yield); <sup>1</sup>H NMR (270 MHz, CDCl<sub>3</sub>): δ 2.48 (s, 3H), 7.15 (dd, *J* = 8.5, 1.6 Hz, 1H), 7.45 (d, *J* = 8.5 Hz, 1H), 7.49–7.55 (m, 4H), 8.22–8.26 (m, 2H); <sup>13</sup>C NMR (67.8 MHz, CDCl<sub>3</sub>): δ 21.5, 109.9, 119.9, 126.2, 127.3, 127.5, 128.8, 131.4, 134.4, 142.2, 149.0, 163.1; GC-MS (EI): *m/z* 209 [M]<sup>+</sup>.

#### 2-Phenylbenzo[*d*]oxazole (**6ab**)<sup>15</sup>

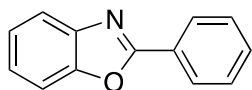

**6ab**

This compound was prepared according to the procedure B and the desired product was obtained after purification by preparative thin-layer chromatography (Hexane/EtOAc = 4/1). White solid

(48.3 mg, 0.247 mmol, 82% yield); <sup>1</sup>H NMR (270 MHz, CDCl<sub>3</sub>): δ 7.32–7.38 (m, 2H), 7.50–7.60 (m, 4H), 7.76–7.81 (m, 1H), 8.24–8.29 (m, 2H); <sup>13</sup>C NMR (67.8 MHz, CDCl<sub>3</sub>): δ 110.6, 120.0, 124.6, 125.1, 127.1, 127.6, 128.9, 131.5, 142.0, 150.7, 163.0; GC-MS (EI): *m/z* 195 [M]<sup>+</sup>.

6-Methyl-2-phenylbenzo[d]oxazole (**6ac**)<sup>15</sup>

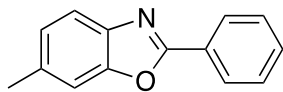

**6ac**

This compound was prepared according to the procedure B and the desired product was obtained after purification by preparative thin-layer chromatography (Hexane/EtOAc = 4/1).

White solid (46.1 mg, 0.220 mmol, 73% yield); <sup>1</sup>H NMR (270 MHz, CDCl<sub>3</sub>): δ 2.51 (s, 3H), 7.15–7.18 (m, 1H), 7.38–7.39 (m, 1H), 7.49–7.54 (m, 3H), 7.64 (d, *J* = 7.8 Hz, 1H), 8.20–8.27 (m, 2H); <sup>13</sup>C NMR (67.8 MHz, CDCl<sub>3</sub>): δ 21.8, 110.8, 119.2, 125.9, 127.1, 127.5, 128.9, 131.4, 135.7, 139.6, 151.0, 162.5; GC-MS (EI): *m/z* 209 [M]<sup>+</sup>.

4-Methyl-2-phenylbenzo[d]oxazole (**6ad**)<sup>15</sup>

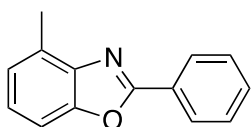

**6ad**

This compound was prepared according to the procedure A and the desired product was obtained after purification by preparative thin-layer chromatography (Hexane/EtOAc = 4/1). Light brown solid (59.9 mg, 0.286 mmol, 95% yield); <sup>1</sup>H NMR (270 MHz,

CDCl<sub>3</sub>): δ 2.67 (s, 3H), 7.11–7.14 (m, 1H), 7.19–7.25 (m, 1H), 7.37–7.40 (m, 1H), 7.48–7.52 (m, 3H), 8.22–8.29 (m, 2H); <sup>13</sup>C NMR (126 MHz, CDCl<sub>3</sub>): δ 16.5, 107.8, 124.7, 125.0, 127.4, 127.5, 128.8, 130.5, 131.2, 141.4, 150.5, 162.2; GC-MS (EI): *m/z* 209 [M]<sup>+</sup>.

7-Methyl-2-phenylbenzo[d]oxazole (**6ae**)

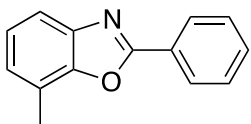

**6ae**

This compound was prepared according to the procedure B and the desired product was obtained after purification by preparative thin-layer chromatography (Hexane/EtOAc = 4/1). White solid (42.0 mg, 0.200 mmol, 67% yield); M.p. 61–63 °C; IR (neat) 3064,

2956, 1614, 1581, 1552, 1448, 1196, 1086, 1022, 777, 746, 704 cm<sup>-1</sup>; <sup>1</sup>H NMR (270 MHz, CDCl<sub>3</sub>): δ 2.59 (s, 3H), 7.14 (d, *J* = 7.6 Hz, 1H), 7.22–7.27 (m, 1H), 7.51–7.55 (m, 3H), 7.60 (d, *J* = 8.1 Hz, 1H), 8.25–8.29 (m, 2H); <sup>13</sup>C NMR (126 MHz, CDCl<sub>3</sub>): δ 15.2, 117.3, 121.1, 124.5, 126.1, 127.3, 127.5, 128.8, 131.4, 141.6, 149.9, 162.7; HRMS (ESI) [M+H]<sup>+</sup> Calcd for C<sub>14</sub>H<sub>12</sub>NO 210.0919; Found 210.0928.

2-Phenyl-5-(trifluoromethyl)benzo[d]oxazole (**6af**)

This compound was prepared according to the procedure A and the desired product was obtained after purification by preparative thin-layer chromatography (Pentane/Et<sub>2</sub>O =

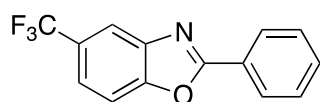

**6af**

9/1). White solid (67.4 mg, 0.256 mmol, 84% yield); M.p. 84–85 °C; IR (neat) 3072, 1630, 1558, 1489, 1340, 1109, 825, 706  $\text{cm}^{-1}$ ;  $^1\text{H}$  NMR (270 MHz,  $\text{CDCl}_3$ ):  $\delta$  7.48–7.66 (m, 5H), 8.03 (d,  $J$  = 0.54 Hz, 1H), 8.22–8.26 (m, 2H);  $^{13}\text{C}$  NMR (126 MHz,  $\text{CDCl}_3$ ):  $\delta$  111.0, 117.7 (q,  $J_{\text{CF}}$  = 4.0 Hz), 122.3 (q,  $J_{\text{CF}}$  = 3.6 Hz), 124.2 (q,  $J_{\text{CF}}$  = 273 Hz), 126.5, 127.4 (q,  $J_{\text{CF}}$  = 32.8 Hz), 127.9, 129.1, 132.2, 142.3, 152.5, 164.8;  $^{19}\text{F}$  NMR (471 MHz,  $\text{CDCl}_3$ ):  $\delta$  –62.1 (s); HRMS (ESI)  $[\text{M}+\text{H}]^+$  Calcd for  $\text{C}_{14}\text{H}_9\text{F}_3\text{NO}$  264.0636; Found 264.0638.

#### 5-Methoxy-2-phenylbenzo[d]oxazole (**6ag**)<sup>15</sup>

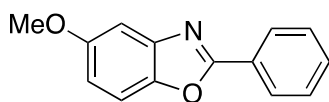

**6ag**

This compound was prepared according to the procedure A and the desired product was obtained after purification by preparative thin-layer chromatography (Hexane/EtOAc = 4/1). White solid (51.5 mg, 0.229 mmol, 76% yield);  $^1\text{H}$  NMR (270 MHz,  $\text{CDCl}_3$ ):  $\delta$  3.87 (s, 3H), 6.95 (dd,  $J$  = 8.9, 2.3 Hz, 1H), 7.26 (d,  $J$  = 2.3 Hz, 1H), 7.46 (d,  $J$  = 8.9 Hz, 1H), 7.49–7.55 (m, 3H), 8.21–8.25 (m, 2H);  $^{13}\text{C}$  NMR (67.8 MHz,  $\text{CDCl}_3$ ):  $\delta$  55.9, 102.8, 110.7, 113.7, 127.2, 127.5, 128.9, 131.4, 142.9, 145.4, 157.4, 163.8; GC-MS (EI):  $m/z$  225  $[\text{M}]^+$ .

#### 6-Chloro-2-phenylbenzo[d]oxazole (**6ah**)<sup>15</sup>

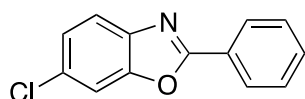

**6ah**

This compound was prepared according to the procedure B and the desired product was obtained after purification by preparative thin-layer chromatography (Hexane/EtOAc = 4/1). White solid (56.8 mg, 0.247 mmol, 82% yield);  $^1\text{H}$  NMR (270 MHz,  $\text{CDCl}_3$ ):  $\delta$  7.33 (dd,  $J$  = 8.5, 2.0 Hz, 1H), 7.48–7.59 (m, 4H), 7.65–7.68 (m, 1H), 8.19–8.25 (m, 2H);  $^{13}\text{C}$  NMR (67.8 MHz,  $\text{CDCl}_3$ ):  $\delta$  111.2, 120.4, 125.3, 126.7, 127.6, 129.0, 130.6, 131.8, 140.9, 150.9, 163.7; GC-MS (EI):  $m/z$  229  $[\text{M}]^+$ .

#### 5-Chloro-2-phenylbenzo[d]oxazole (**6ai**)<sup>16</sup>

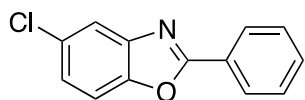

**6ai**

This compound was prepared according to the procedure B and the desired product was obtained after purification by preparative thin-layer chromatography (Hexane/EtOAc = 4/1). White solid (57.5 mg, 0.250 mmol, 83% yield);  $^1\text{H}$  NMR (270 MHz,  $\text{CDCl}_3$ ):  $\delta$  7.32 (dd,  $J$  = 8.8, 2.3 Hz, 1H), 7.48–7.57 (m, 4H), 7.74–7.75 (m, 1H), 8.21–8.26 (m, 2H);  $^{13}\text{C}$

NMR (126 MHz, CDCl<sub>3</sub>):  $\delta$  111.3, 120.0, 125.4, 126.7, 127.8, 129.0, 130.1, 131.9, 143.2, 149.3, 164.4; GC-MS (EI):  $m/z$  229 [M]<sup>+</sup>.

6-Bromo-2-phenylbenzo[d]oxazole (**6aj**)<sup>15</sup>

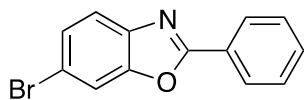

**6aj**

This compound was prepared according to the procedure B and the desired product was obtained after purification by preparative thin-layer chromatography (Hexane/EtOAc = 4/1).

White solid (62.9 mg, 0.229 mmol, 76% yield as a 90:10 mixture of **6aj**:**6ab**); <sup>1</sup>H NMR (270 MHz, CDCl<sub>3</sub>):  $\delta$  7.45–7.56 (m, 4H), 7.61–7.64 (m, 1H), 7.74 (d,  $J$  = 1.4 Hz, 1H), 8.18–8.24 (m, 2H); <sup>13</sup>C NMR (67.8 MHz, CDCl<sub>3</sub>):  $\delta$  114.1, 117.9, 120.9, 126.6, 127.6, 128.0, 128.9, 131.8, 141.3, 151.2, 163.5; GC-MS (EI):  $m/z$  273 [M]<sup>+</sup>.

5-Bromo-2-phenylbenzo[d]oxazole (**6ak**)

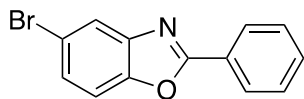

**6ak**

This compound was prepared according to the procedure B and the desired product was obtained after purification by preparative thin-layer chromatography (Hexane/EtOAc = 4/1).

White solid (61.5 mg, 0.224 mmol, 74% yield); M.p. 102–103 °C; IR (neat) 3059, 1608, 1550, 1487, 1281, 1057, 854, 808 cm<sup>-1</sup>; <sup>1</sup>H NMR (270 MHz, CDCl<sub>3</sub>):  $\delta$  7.45–7.57 (m, 5H), 7.89–7.90 (m, 1H), 8.21–8.25 (m, 2H); <sup>13</sup>C NMR (67.8 MHz, CDCl<sub>3</sub>):  $\delta$  111.8, 117.3, 123.0, 126.6, 127.7, 128.1, 129.0, 131.9, 143.7, 149.7, 164.1; HRMS (ESI) [M+H]<sup>+</sup> Calcd for C<sub>13</sub>H<sub>9</sub>BrNO 273.9868; Found 273.9858.

2,5-Diphenylbenzo[d]oxazole (**6al**)

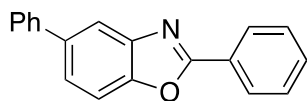

**6al**

This compound was prepared according to the procedure B and the desired product was obtained after purification by preparative thin-layer chromatography (Hexane/EtOAc = 4/1).

White solid (47.0 mg, 0.173 mmol, 57% yield); M.p. 123–125 °C; IR (neat) 3059, 1620, 1554, 818, 760, 696 cm<sup>-1</sup>; <sup>1</sup>H NMR (270 MHz, CDCl<sub>3</sub>):  $\delta$  7.33–7.39 (m, 1H), 7.43–7.65 (m, 9H), 7.96–7.97 (m, 1H), 8.23–8.30 (m, 2H); <sup>13</sup>C NMR (67.8 MHz, CDCl<sub>3</sub>):  $\delta$  110.5, 118.4, 124.7, 127.1, 127.2, 127.4, 127.6, 128.8, 128.9, 131.6, 138.4, 141.0, 142.7, 150.3, 163.6; HRMS (ESI) [M+H]<sup>+</sup> Calcd for C<sub>19</sub>H<sub>14</sub>NO 272.1075; Found 272.1070.

5-Methyl-2-(*p*-tolyl)benzo[*d*]oxazole (**6ba**)<sup>17</sup>

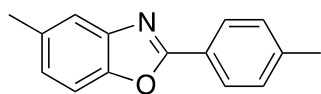

**6ba**

This compound was prepared according to the procedure B and the desired product was obtained after purification by preparative thin-layer chromatography (Hexane/EtOAc = 4/1). White solid (50.5 mg, 0.227 mmol, 76% yield as a 90:10 mixture of **6ba**:**6aa**); <sup>1</sup>H NMR (270 MHz, CDCl<sub>3</sub>): δ 2.42 (s, 3H), 2.47 (s, 3H), 7.11–7.16 (m, 1H), 7.29–7.32 (m, 2H), 7.40–7.45 (m, 1H), 7.49–7.54 (m, 1H), 8.09–8.14 (m, 2H); <sup>13</sup>C NMR (67.8 MHz, CDCl<sub>3</sub>): δ 21.5, 21.6, 109.8, 119.7, 124.5, 125.9, 127.5, 129.6, 134.2, 141.8, 142.3, 148.9, 163.3; GC-MS (EI): *m/z* 223 [M]<sup>+</sup>.

2-(4-(*tert*-Butyl)phenyl)-5-methylbenzo[*d*]oxazole (**6ca**)

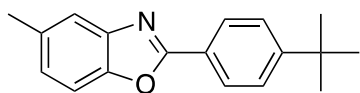

**6ca**

This compound was prepared according to the procedure B and the desired product was obtained after purification by preparative thin-layer chromatography (Hexane/EtOAc = 4/1). White solid (44.5 mg, 0.168 mmol, 56% yield); M.p. 88–90 °C; IR (neat) 2962, 1618, 1576, 1554, 1363, 1109, 1057, 843, 827, 798 cm<sup>-1</sup>; <sup>1</sup>H NMR (270 MHz, CDCl<sub>3</sub>): δ 1.37 (s, 9H), 2.48 (s, 3H), 7.12–7.16 (m, 1H), 7.44 (d, *J* = 8.4 Hz, 1H), 7.51–7.56 (m, 3H), 8.14–8.19 (m, 2H); <sup>13</sup>C NMR (67.8 MHz, CDCl<sub>3</sub>): δ 21.5, 31.1, 35.0, 109.8, 119.8, 124.5, 125.8, 125.9, 127.4, 134.2, 142.4, 148.9, 154.9, 163.3; HRMS (ESI) [M+H]<sup>+</sup> Calcd for C<sub>18</sub>H<sub>20</sub>NO 266.1545; Found 266.1547.

2-(4-Methoxyphenyl)-5-methylbenzo[*d*]oxazole (**6da**)

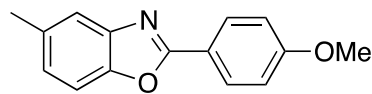

**6da**

This compound was prepared according to the procedure B and the desired product was obtained after purification by preparative thin-layer chromatography (Hexane/EtOAc = 4/1). White solid (47.2 mg, 0.197 mmol, 66% yield); m.p. 107–109 °C; IR (neat) 2974, 1606, 1558, 1500, 1174, 1020, 881, 841, 802 cm<sup>-1</sup>; <sup>1</sup>H NMR (270 MHz, CDCl<sub>3</sub>): δ 2.47 (s, 3H), 3.88 (s, 3H), 7.01 (d, *J* = 8.7 Hz, 2H), 7.12 (d, *J* = 8.3 Hz, 1H), 7.41 (d, *J* = 8.3 Hz, 1H), 7.51 (s, 1H), 8.17 (d, *J* = 8.7 Hz, 2H); <sup>13</sup>C NMR (67.8 MHz, CDCl<sub>3</sub>): δ 21.5, 55.4, 109.7, 114.3, 119.5, 119.8, 125.7, 129.3, 134.2, 142.3, 148.8, 162.2, 163.2; HRMS (ESI) [M+H]<sup>+</sup> Calcd for C<sub>15</sub>H<sub>14</sub>NO<sub>2</sub> 240.1025; Found 240.1022.

5-Methyl-2-(4-(trifluoromethyl)phenyl)benzo[d]oxazole (**6ea**)<sup>18</sup>

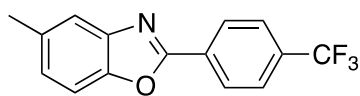

**6ea**

This compound was prepared according to the procedure B and the desired product was obtained after purification by preparative thin-layer chromatography (Pentane/Et<sub>2</sub>O

= 9/1). White solid (42.3 mg, 0.153 mmol, 50% yield); <sup>1</sup>H NMR (270 MHz, CDCl<sub>3</sub>): δ 2.48 (s, 3H), 7.17–7.20 (m, 1H), 7.45 (d, *J* = 8.4 Hz, 1H), 7.55–7.56 (m, 1H), 7.74–7.77 (m, 2H), 8.31–8.34 (m, 2H); <sup>13</sup>C NMR (126 MHz, CDCl<sub>3</sub>): δ 21.5, 110.1, 120.2, 123.8 (q, *J*<sub>CF</sub> = 273 Hz), 125.9 (q, *J*<sub>CF</sub> = 4.0 Hz), 127.0, 127.8, 130.6, 132.8 (q, *J*<sub>CF</sub> = 32.8 Hz), 134.8, 142.1, 149.1, 161.5; <sup>19</sup>F NMR (471 MHz, CDCl<sub>3</sub>): δ –63.9 (s); GC-MS (EI): *m/z* 277 [M]<sup>+</sup>.

4-(5-methylbenzo[d]oxazol-2-yl)benzonitrile (**6fa**)

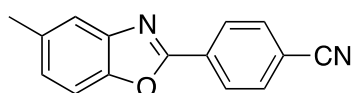

**6fa**

This compound was prepared according to the procedure B and the desired product was obtained after purification by preparative thin-layer chromatography (Hexane/EtOAc

= 4/1). White solid (18.1 mg, 0.0773 mmol, 26% yield); M.p. 176–178 °C; IR (neat) 2929, 2225, 1570, 1547, 1493, 1281, 1059, 845, 796 cm<sup>–1</sup>; <sup>1</sup>H NMR (270 MHz, CDCl<sub>3</sub>): δ 2.50 (s, 3H), 7.21–7.25 (m, 1H), 7.48 (d, *J* = 8.4 Hz, 1H), 7.58–7.59 (m, 1H), 7.78–7.83 (m, 2H), 8.32–8.38 (m, 2H); <sup>13</sup>C NMR (67.8 MHz, CDCl<sub>3</sub>): δ 21.5, 110.2, 114.5, 118.2, 120.3, 127.3, 127.8, 131.3, 132.6, 135.0, 142.0, 149.1, 161.0; HRMS (ESI) [M+H]<sup>+</sup> Calcd for C<sub>15</sub>H<sub>11</sub>N<sub>2</sub>O 235.0871; Found 235.0873.

2-(4-Fluorophenyl)-5-methylbenzo[d]oxazole (**6ga**)<sup>19</sup>

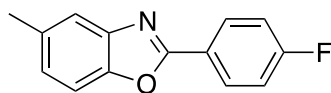

**6ga**

This compound was prepared according to the procedure A and the desired product was obtained after purification by preparative thin-layer chromatography (Pentane/Et<sub>2</sub>O = 9/1).

White solid (50.6 mg, 0.22 mmol, 74% yield as a 74:26 mixture of **6ga**:**6aa** (determined by a GC-MS analysis)); <sup>1</sup>H NMR (270 MHz, CDCl<sub>3</sub>): δ 2.48 (s, 3H), 7.13–7.24 (m, 3H), 7.41–7.46 (m, 1H), 7.50–7.53 (m, 1H), 8.19–8.26 (m, 2H); <sup>13</sup>C NMR (67.8 MHz, CDCl<sub>3</sub>): δ 21.5, 109.9, 116.1 (d, *J*<sub>CF</sub> = 22.3 Hz), 119.9, 123.6 (d, *J*<sub>CF</sub> = 3.4 Hz), 126.2, 129.7 (d, *J*<sub>CF</sub> = 8.9 Hz), 134.5, 142.2, 149.0, 162.2, 164.7 (d, *J*<sub>CF</sub> = 252 Hz); <sup>19</sup>F NMR (471 MHz, CDCl<sub>3</sub>): δ –108.71– –108.70 (m); GC-MS (EI): *m/z* 227 [M]<sup>+</sup>.

2-(4-Bromophenyl)-5-methylbenzo[d]oxazole (**6ha**)<sup>20</sup>

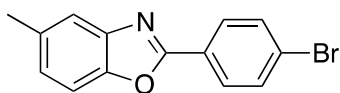

**6ha**

This compound was prepared according to the procedure B and the desired product was obtained after purification by preparative thin-layer chromatography (Pentane/Et<sub>2</sub>O =

9/1). White solid (60 mg, 0.208 mmol, 69% yield as a 87:13 mixture of **6ha**:**6aa**); <sup>1</sup>H NMR (270 MHz, CDCl<sub>3</sub>): δ 2.49 (s, 3H), 7.15–7.19 (m, 1H), 7.43–7.47 (m, 1H), 7.51–7.56 (m, 1H), 7.63–7.68 (m, 2H), 8.07–8.12 (m, 2H); <sup>13</sup>C NMR (67.8 MHz, CDCl<sub>3</sub>): δ 21.5, 110.0, 120.0, 126.0, 126.2, 126.5, 128.9, 132.1, 134.6, 142.2, 149.0, 162.2; GC-MS (EI): *m/z* 287 [M]<sup>+</sup>.

1-(4-(5-Methylbenzo[d]oxazol-2-yl)phenyl)ethanone (**6ia**)

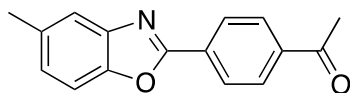

**6ia**

This compound was prepared according to the procedure A and the desired product was obtained after purification by preparative thin-layer chromatography (Hexane/EtOAc

= 4/1). White solid (17.7 mg, 0.0704 mmol, 23% yield); M.p. 157–158 °C; IR (neat) 2931, 1670, 1408, 1354, 841, 804, 756 cm<sup>-1</sup>; <sup>1</sup>H NMR (270 MHz, CDCl<sub>3</sub>): δ 2.50 (s, 3H), 2.67 (s, 3H), 7.19–7.22 (m, 1H), 7.48 (d, *J* = 8.4 Hz, 1H), 7.58 (d, *J* = 0.54 Hz, 1H), 8.08–8.11 (m, 2H), 8.34 (dd, *J* = 6.8, 1.5 Hz, 2H); <sup>13</sup>C NMR (67.8 MHz, CDCl<sub>3</sub>): δ 21.5, 26.8, 110.1, 120.2, 127.0, 127.6, 128.8, 131.2, 134.8, 138.8, 142.1, 149.1, 161.9, 197.4; HRMS (ESI) [M+H]<sup>+</sup> Calcd for C<sub>16</sub>H<sub>14</sub>NO<sub>2</sub> 252.1025; Found 252.1032.

Ethyl 4-(5-methylbenzo[d]oxazol-2-yl)benzoate (**6ja**)<sup>21</sup>

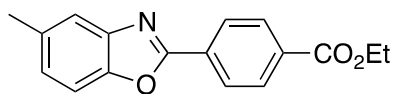

**6ja**

This compound was prepared according to the procedure B and the desired product was obtained after purification by preparative thin-layer chromatography

(Hexane/EtOAc = 4/1). White solid (16.1 mg, 0.0572 mmol, 19% yield); <sup>1</sup>H NMR (270 MHz, CDCl<sub>3</sub>): δ 1.43 (t, *J* = 7.1 Hz, 3H), 2.49 (s, 3H), 4.42 (q, *J* = 7.1 Hz, 2H), 7.19 (dd, *J* = 8.5, 1.1 Hz, 1H), 7.47 (d, *J* = 8.5 Hz, 1H), 7.57–7.58 (m, 1H), 8.16–8.20 (m, 2H), 8.30 (dd, *J* = 6.6, 1.8 Hz, 2H); <sup>13</sup>C NMR (126 MHz, CDCl<sub>3</sub>): δ 14.3, 21.5, 61.3, 110.1, 120.2, 126.9, 127.3, 130.0, 131.1, 132.7, 134.7, 142.2, 149.1, 162.0, 165.9; GC-MS (EI): *m/z* 281 [M]<sup>+</sup>.

### 5-Methyl-2-(*m*-tolyl)benzo[*d*]oxazole (**6ka**)<sup>22</sup>

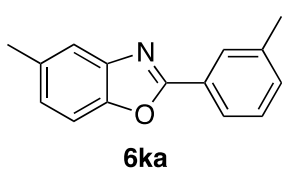

This compound was prepared according to the procedure A and the desired product was obtained after purification by preparative thin-layer chromatography (Hexane/EtOAc = 4/1).

White solid (55.2 mg, 0.248 mmol, 82% yield as a 95:5 mixture of **6ka:6aa**); <sup>1</sup>H NMR (270 MHz, CDCl<sub>3</sub>): δ 2.46 (s, 3H), 2.49 (s, 3H), 7.14–7.18 (m, 1H), 7.33–7.47 (m, 3H), 7.51–7.55 (m, 1H), 8.04 (d, *J* = 7.6 Hz, 1H), 8.08–8.09 (m, 1H); <sup>13</sup>C NMR (67.8 MHz, CDCl<sub>3</sub>): δ 21.3, 21.4, 109.8, 119.8, 124.6, 126.1, 127.1, 128.0, 128.7, 132.1, 134.2, 138.6, 142.2, 148.9, 163.2; GC-MS (EI): *m/z* 223 [M]<sup>+</sup>.

### 2-(3-Methoxyphenyl)-5-methylbenzo[*d*]oxazole (**6la**)<sup>17</sup>

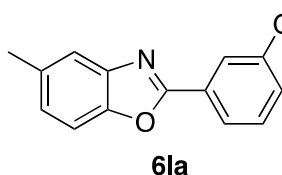

This compound was prepared according to the procedure B and the desired product was obtained after purification by preparative thin-layer chromatography (Hexane/EtOAc = 4/1). White solid (48.9 mg, 0.203 mmol, 68% yield); <sup>1</sup>H

NMR (270 MHz, CDCl<sub>3</sub>): δ 2.48 (s, 3H), 3.91 (s, 3H), 7.05–7.09 (m, 1H), 7.16 (d, *J* = 8.1 Hz, 1H), 7.39–7.46 (m, 2H), 7.55 (s, 1H), 7.76–7.77 (m, 1H), 7.83 (d, *J* = 7.6 Hz, 1H); <sup>13</sup>C NMR (67.8 MHz, CDCl<sub>3</sub>): δ 21.5, 55.5, 109.9, 111.8, 118.2, 119.8, 120.0, 126.3, 128.4, 129.9, 134.4, 142.1, 148.9, 159.9, 163.0; GC-MS (EI): *m/z* 239 [M]<sup>+</sup>.

### 5-Methyl-2-(3-(trifluoromethyl)phenyl)benzo[*d*]oxazole (**6ma**)

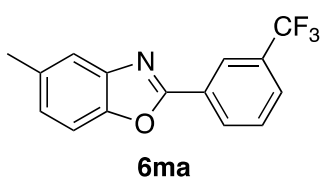

This compound was prepared according to the procedure B and the desired product was obtained after purification by preparative thin-layer chromatography (Pentane/Et<sub>2</sub>O = 9/1).

White solid (54.0 mg, 0.195 mmol, 65% yield as a 92:8 mixture of **6ma:6aa**); M.p. 84–93 °C; IR (neat) 3059, 1624, 1556, 1344, 1115, 1057, 804, 773 cm<sup>-1</sup>; <sup>1</sup>H NMR (270 MHz, CDCl<sub>3</sub>): δ 2.49 (s, 3H), 7.18–7.21 (m, 1H), 7.43–7.57 (m, 2H), 7.65 (dd, *J* = 7.8, 7.8 Hz, 1H), 7.77 (d, *J* = 7.8 Hz, 1H), 8.41 (d, *J* = 7.6 Hz, 1H), 8.51 (s, 1H); <sup>13</sup>C NMR (126 MHz, CDCl<sub>3</sub>): δ 21.5, 110.1, 120.2, 123.7 (q, *J*<sub>CF</sub> = 273 Hz), 124.4 (q, *J*<sub>CF</sub> = 3.6 Hz), 126.9, 127.8 (q, *J*<sub>CF</sub> = 4.0 Hz), 128.2, 129.5, 130.5, 131.6 (q, *J*<sub>CF</sub> = 33.2 Hz), 134.8, 142.1, 149.1, 161.6; <sup>19</sup>F NMR (471 MHz, CDCl<sub>3</sub>): δ –63.8 (s); HRMS (ESI) [M+H]<sup>+</sup> Calcd for C<sub>15</sub>H<sub>11</sub>F<sub>3</sub>NO 278.0793; Found 278.0796.

5-Methyl-2-(*o*-tolyl)benzo[*d*]oxazole (**6na**)<sup>22</sup>

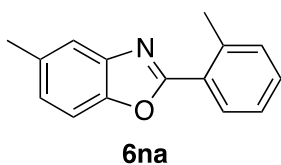

This compound was prepared according to the procedure A and the desired product was obtained after purification by preparative thin-layer chromatography (Hexane/EtOAc = 4/1).

White solid (47.1 mg, 0.212 mmol, 70% yield); <sup>1</sup>H NMR (270 MHz, CDCl<sub>3</sub>): δ 2.49 (s, 3H), 2.80 (s, 3H), 7.15–7.19 (m, 1H), 7.30–7.47 (m, 4H), 7.58–7.59 (m, 1H), 8.14–8.18 (m, 1H); <sup>13</sup>C NMR (67.8 MHz, CDCl<sub>3</sub>): δ 21.5, 22.2, 109.8, 120.0, 126.0, 126.1, 126.4, 129.9, 130.8, 131.7, 134.1, 138.7, 142.3, 148.5, 163.5; GC-MS (EI): *m/z* 223 [M]<sup>+</sup>.

5-Methyl-2-(naphthalen-1-yl)benzo[*d*]oxazole (**6oa**)<sup>19</sup>

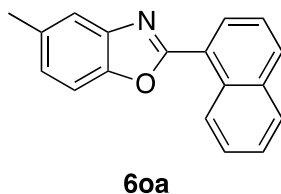

This compound was prepared according to the procedure A and the desired product was obtained after purification by preparative thin-layer chromatography (Hexane/EtOAc = 4/1).

Yellow solid (11.8 mg, 0.0455 mmol, 15% yield); <sup>1</sup>H NMR (270 MHz, CDCl<sub>3</sub>): δ 2.52 (s, 3H), 7.19–7.23 (m, 1H), 7.52 (d, *J* = 8.4 Hz, 1H), 7.56–7.63 (m, 2H), 7.66–7.74 (m, 2H), 7.94 (dd, *J* = 8.1, 0.81 Hz, 1H), 8.03 (d, *J* = 8.1 Hz, 1H), 8.41 (dd, *J* = 8.0, 1.2 Hz, 1H), 9.45 (d, *J* = 8.0 Hz, 1H); <sup>13</sup>C NMR (67.8 MHz, CDCl<sub>3</sub>): δ 21.5, 109.9, 120.2, 123.8, 124.9, 126.3, 126.4 (2C), 127.8, 128.6, 129.2, 130.7, 132.1, 134.0, 134.3, 142.5, 148.4, 162.9; GC-MS (EI): *m/z* 259 [M]<sup>+</sup>.

5-Methyl-2-(thiophen-2-yl)benzo[*d*]oxazole (**6pa**)<sup>19</sup>

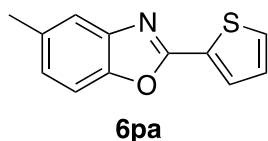

This compound was prepared according to the procedure B and the desired product was obtained after purification by preparative thin-layer chromatography (Hexane/EtOAc = 4/1). Pale yellow

solid (19.1 mg, 0.0887 mmol, 30% yield as a 99:1 mixture of **6pa**:**6aa**); <sup>1</sup>H NMR (270 MHz, CDCl<sub>3</sub>): δ 2.47 (s, 3H), 7.12–7.20 (m, 2H), 7.41 (d, *J* = 8.4 Hz, 1H), 7.51–7.55 (m, 2H), 7.88–7.90 (m, 1H); <sup>13</sup>C NMR (67.8 MHz, CDCl<sub>3</sub>): δ 21.5, 109.7, 119.7, 126.1, 128.2, 129.7, 129.8, 130.0, 134.5, 142.1, 148.6, 159.1; GC-MS (EI): *m/z* 215 [M]<sup>+</sup>.

### 2-Cyclohexyl-5-methylbenzo[d]oxazole (**6qa**)<sup>23</sup>

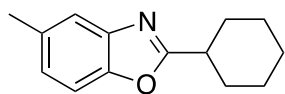

**6qa**

This compound was prepared according to the procedure B and the desired product was obtained after purification by preparative thin-layer chromatography (Hexane/EtOAc = 4/1).

Yellow oil (53.8 mg, 0.250 mmol, 82% yield as a 93:7 mixture of **6qa**:**6aa**); <sup>1</sup>H NMR (270 MHz, CDCl<sub>3</sub>): δ 1.25–1.50 (m, 3H), 1.62–1.76 (m, 3H), 1.84–1.90 (m, 2H), 2.13–2.18 (m, 2H), 2.45 (s, 3H), 2.87–2.98 (m, 1H), 7.07–7.10 (m, 1H), 7.31–7.35 (m, 1H), 7.45–7.47 (m, 1H); <sup>13</sup>C NMR (67.8 MHz, CDCl<sub>3</sub>): δ 21.4, 25.6, 25.7, 30.5, 37.9, 109.6, 119.5, 125.3, 133.7, 141.4, 148.8, 170.5; GC-MS (EI): *m/z* 215 [M]<sup>+</sup>.

### 5-Methyl-2-phenethylbenzo[d]oxazole (**6ra**)

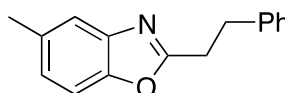

**6ra**

This compound was prepared according to the procedure A and the desired product was obtained after purification by preparative thin-layer chromatography (Pentane/Et<sub>2</sub>O = 9/1).

Brown oil (44.5 mg, 0.188 mmol, 62% yield); IR (neat) 3028, 2925, 2864, 1574, 1481, 1454, 1261, 800, 750, 698 cm<sup>-1</sup>; <sup>1</sup>H NMR (270 MHz, CDCl<sub>3</sub>): δ 2.45 (s, 3H), 3.21 (s, 4H), 7.07–7.11 (m, 1H), 7.17–7.36 (m, 6H), 7.45–7.46 (m, 1H); <sup>13</sup>C NMR (67.8 MHz, CDCl<sub>3</sub>): δ 21.4, 30.5, 32.8, 109.6, 119.5, 125.5, 126.4, 128.2, 128.6, 133.9, 140.1, 141.4, 149.0, 166.3; HRMS (ESI) [M+H]<sup>+</sup> Calcd for C<sub>16</sub>H<sub>16</sub>NO 238.1232; Found 238.1237.

## Preliminary mechanistic experiments

### Cu-Catalyzed hydroamination of alkynone **4a** with *o*-anisidine

Cu(OTf)<sub>2</sub> (5.4 mg, 0.0150 mmol), alkynone **4a** (61.9 mg, 0.300 mmol), and *o*-anisidine (37.3 mg, 0.300 mmol) were charged into a screw vial and the vial was refilled with N<sub>2</sub>. After the addition of *o*-xylene (0.6 mL), the resulting mixture was stirred at 120 °C for 19 h. The reaction was allowed to cool to room temperature and then quenched with water (1 mL). The aqueous phase was extracted with EtOAc (2 mL × 1). The organic phase was washed with brine (1 mL × 1) and dried over MgSO<sub>4</sub>. After removal of the solvent, the resulting crude mixture was purified by preparative thin-layer chromatography (Pentane/EtOAc = 1/1) to give the hydroamination product **7**.

### 3-((2-Methoxyphenyl)amino)-1,3-diphenylprop-2-en-1-one (**7**)

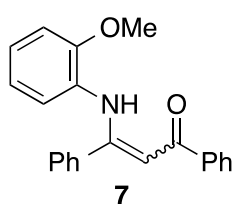

Slightly brown solid (65.7 mg, 0.199 mmol, 66% yield); M.p. 104–105 °C; IR (neat) 3060, 2837, 1597, 1568, 1516, 1493, 1464, 1254, 1024, 746, 698 cm<sup>-1</sup>; <sup>1</sup>H NMR (270 MHz, CDCl<sub>3</sub>): δ 3.91 (s, 3H), 6.09 (s, 1H), 6.39 (d, *J* = 7.9 Hz, 1H), 6.56 (dd, *J* = 7.9, 7.6 Hz, 1H), 6.84–6.87 (m, 1H), 6.92–6.98 (m, 1H), 7.30–7.47 (m, 8H), 7.95–8.00 (dd, *J* = 7.6, 2.2 Hz, 2H), 12.7 (brs, 1H); <sup>13</sup>C NMR (67.8 MHz, CDCl<sub>3</sub>): δ 55.7, 97.4, 110.8, 119.9, 123.3, 124.5, 127.3, 128.0, 128.2, 128.4, 128.6, 129.5, 131.1, 136.3, 140.0, 151.2, 160.8, 189.4; HRMS (ESI) [M+H]<sup>+</sup> Calcd for C<sub>22</sub>H<sub>20</sub>NO<sub>2</sub> 330.1494; Found 330.1494.

### Synthesis of possible intermediate **8**

This compound was prepared according to the literature procedure<sup>24</sup> and the NMR data were consistent with the reported values.

### (*E*)-3-((2-Hydroxyphenyl)amino)-1,3-diphenylprop-2-en-1-one (**8**)<sup>24</sup>

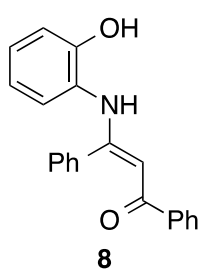

<sup>1</sup>H NMR (270 MHz, DMSO-*d*<sub>6</sub>): δ 6.11 (s, 1H), 6.27 (d, *J* = 8.4 Hz, 1H), 6.40–6.46 (m, 1H), 6.80–6.90 (m, 2H), 7.39–7.53 (m, 8H), 7.98 (d, *J* = 8.4 Hz, 2H), 10.1 (s, 1H), 12.6 (s, 1H); <sup>13</sup>C NMR (67.8 MHz, DMSO-*d*<sub>6</sub>): δ 96.3, 115.6, 118.6, 123.5, 124.9, 126.9, 127.1, 128.0, 128.5, 128.6, 129.8, 131.4, 135.6, 139.4, 149.3, 160.8, 187.9; ESI-MS : *m/z* 338 [M+Na]<sup>+</sup>.

### Cu-Catalyzed transformation of possible intermediate **8** to benzoxazole **6ab**

Cu(OTf)<sub>2</sub> (2.7 mg, 0.0075 mmol) and **8** (47.5 mg, 0.150 mmol) were charged into a screw vial and the vial was refilled with N<sub>2</sub>. After the addition of *o*-xylene (0.3 mL), the resulting mixture was stirred at 120 °C for 23 h. The reaction was allowed to cool to room temperature and then quenched with water (0.5 mL). The aqueous phase was extracted with EtOAc (1 mL × 1). The organic phase was washed with brine (0.5 mL × 1) and dried over MgSO<sub>4</sub>. After removal of the solvent, the yield of benzoxazole **6ab** was determined by <sup>1</sup>H NMR analysis as of the resulting crude mixture using dibromomethane as an internal standard.

## 6. References

1. Konno, T.; Chae, J.; Kanda, M.; Nagai, G.; Tamura, K.; Ishihara, T.; Yamanaka, H. *Tetrahedron* **2003**, *59*, 7571–7580.
2. Zhou, Q.-Q.; Guo, W.; Ding, W.; Wu, X.; Chen, X.; Lu, L.-Q.; Xiao, W.-J. *Angew. Chem. Int. Ed.* **2015**, *54*, 11196–11199.
3. Sun, G.; Lei, M.; Hu, L. *RSC Adv.* **2016**, *6*, 28442–28446.
4. Atobe, S.; Masuno, H.; Sonoda, M.; Suzuki, Y.; Shinohara, H.; Shibata, S.; Ogawa, A. *Tetrahedron Lett.* **2012**, *53*, 1764–1767.
5. Dermenci, A.; Whittaker, R. E.; Gao, Y.; Cruz, F. A.; Yu, Z.-X.; Dong, G. *Chem. Sci.* **2015**, *6*, 3201–3210.
6. Liu, J.; Peng, X.; Sun, W.; Zhao, Y.; Xia, C. *Org. Lett.* **2008**, *10*, 3933–3936.
7. Gandeepan, P.; Parthasarathy, K.; Su, T.-H.; Cheng, C.-H. *Adv. Synth. Catal.* **2012**, *354*, 457–468.
8. Dasgupta, A.; Ramkumar, V.; Sankararaman, S. *Eur. J. Org. Chem.* **2016**, *28*, 4817–4823.
9. Negishi, E.; Qian, M.; Zeng, F.; Anastasia, L.; Babinski, D. *Org. Lett.* **2003**, *5*, 1597–1600.
10. Okamoto, K.; Shimbayashi, T.; Tamura, E.; Ohe, K. *Org. Lett.* **2015**, *17*, 5843–5845.
11. Zhang, C.; Liu, J.; Xia, C. *Org. Biomol. Chem.* **2014**, *12*, 9702–9706.
12. Vasilyev, A. V.; Walspurger, S.; Haouas, M.; Sommer, J.; Pale, P.; Rudenko, A. P. *Org. Biomol. Chem.* **2004**, *2*, 3483–3489.
13. Waldo, J. P.; Larock, R. C. *J. Org. Chem.* **2007**, *72*, 9643–9647.
14. Taylor, C. J.; Motevalli, M.; Richards, C. J. *Organometallics* **2006**, *25*, 2899–2902.
15. Ueda, S.; Nagasawa, H. *Angew. Chem. Int. Ed.* **2008**, *47*, 6411–6413.
16. Tang, L.; Yang, Z.; Sun, T.; Zhang, D.; Ma, X.; Rao, W.; Zhou, Y. *Adv. Synth. Catal.* **2018**, *360*, 3055–3062.
17. Ackermann, L.; Barfusser, S.; Pospech, J. *Org. Lett.* **2010**, *12*, 724–726.
18. Zhang, M.; Zhang, S.; Liu, M.; Cheng, J. *Chem. Commun.* **2011**, *47*, 11522–11524.
19. Gopalaiah, K.; Chandrudu, S. N. *RSC Adv.* **2015**, *5*, 5015–5023.
20. Li, W.-C.; Zeng, C.-C.; Hu, L.-M.; Tian, H.-Y.; Little, R. D. *Adv. Synth. Catal.* **2013**, *355*, 2884–2890.
21. Steinberg, D. F.; Turk, M. C.; Kalyani, D. *Tetrahedron* **2017**, *73*, 2196–2209.

22. Wang, L.; Ma, Z.-G.; Wei, X.-J.; Meng, Q.-Y.; Yang, D.-T.; Du, S.-F.; Chen, Z.-F.; Wu, L.-Z.; Liu, Q. *Green Chem.* **2014**, *16*, 3752–3757.
23. Yao, T.; Hirano, K.; Satoh, T.; Miura, M. *Angew. Chem. Int. Ed.* **2012**, *51*, 775–779.
24. Mayo, M. S.; Yu, X.; Zhou, X.; Feng, X.; Yamamoto, Y.; Bao, M. *J. Org. Chem.* **2014**, *79*, 6310–6314.

Copies of NMR spectra ( $^1\text{H}$ ,  $^{13}\text{C}$ , and  $^{19}\text{F}$ )

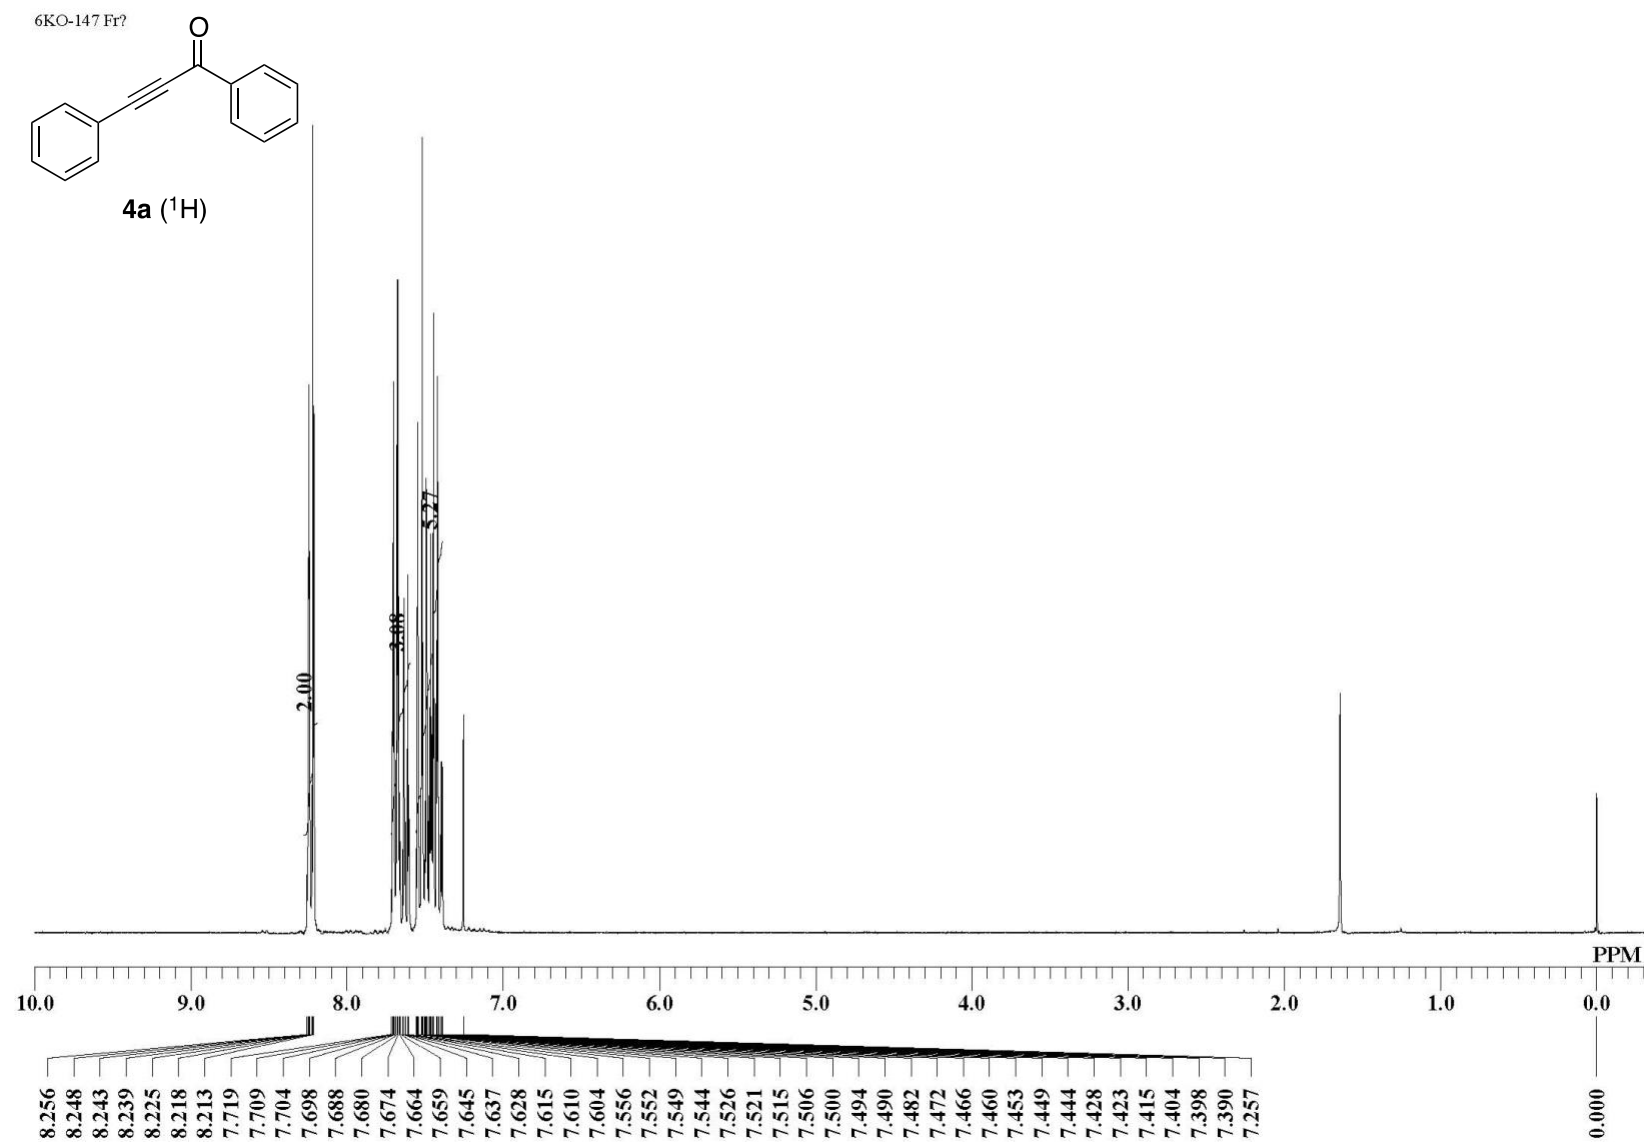

7KH-9-recrystallization2

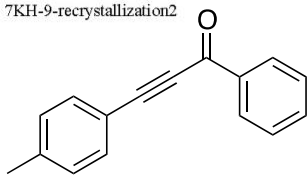

**4b** (<sup>1</sup>H)

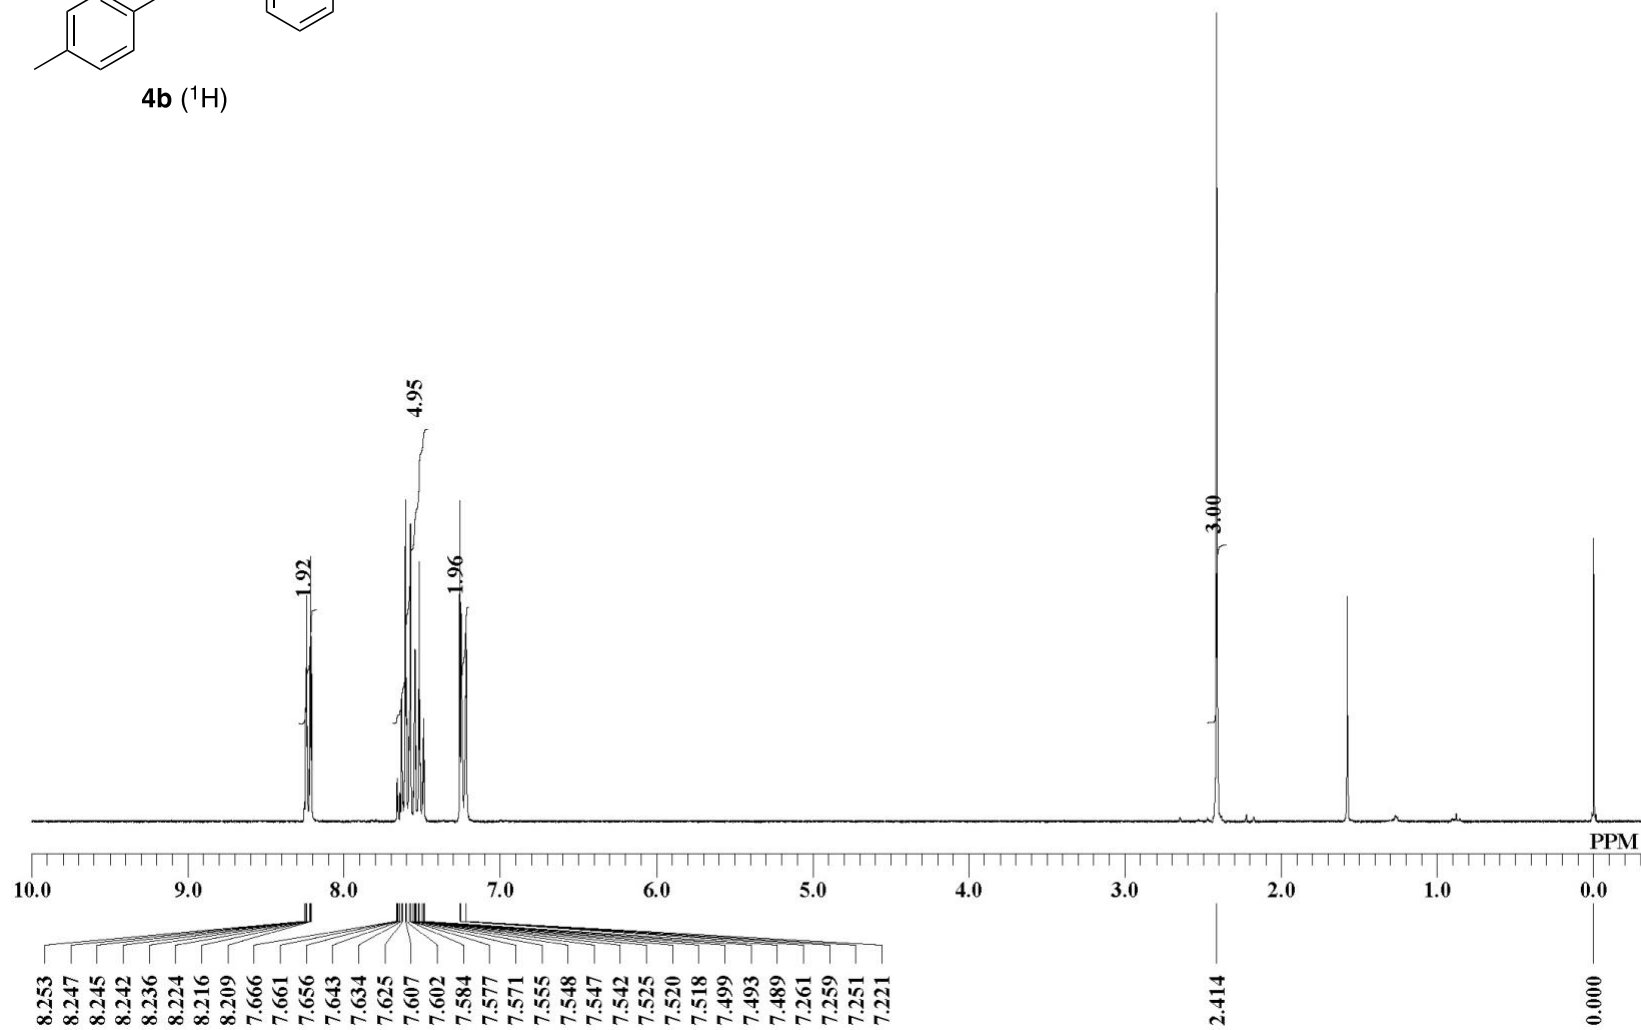

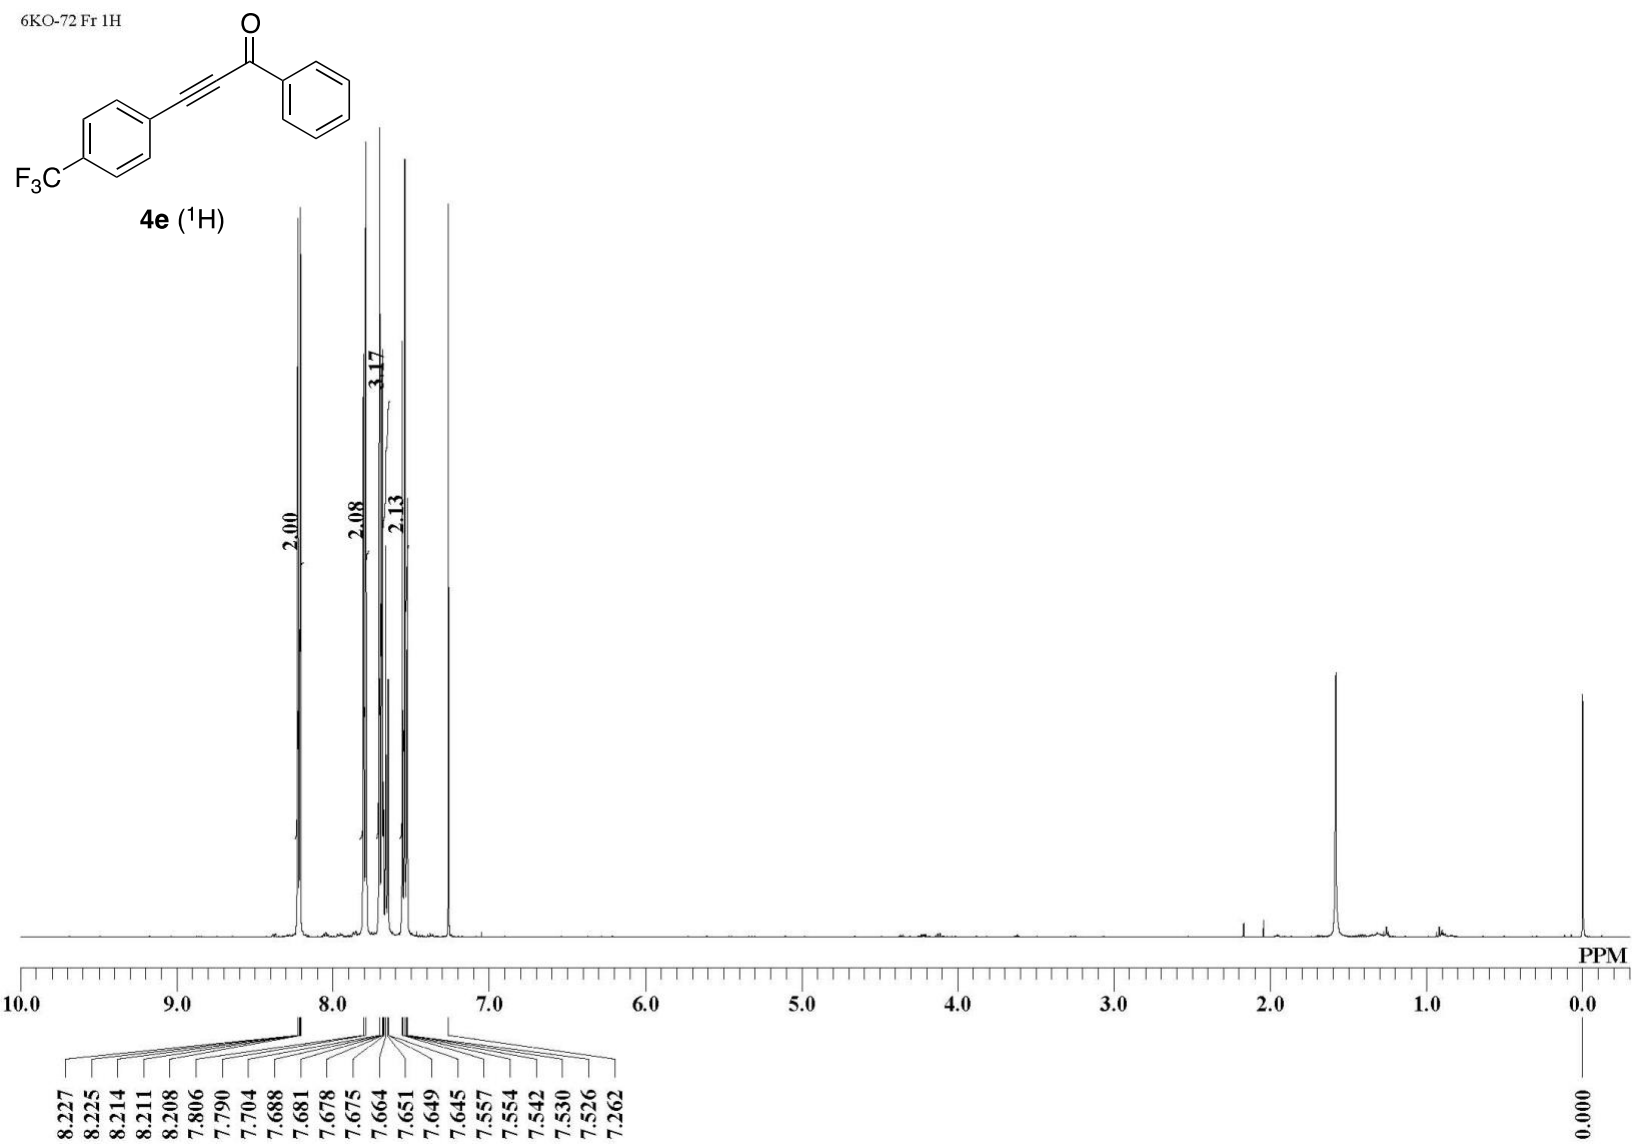

6KO-174 Fr

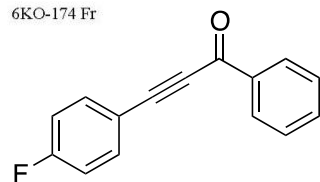

**4g** ( $^1\text{H}$ )

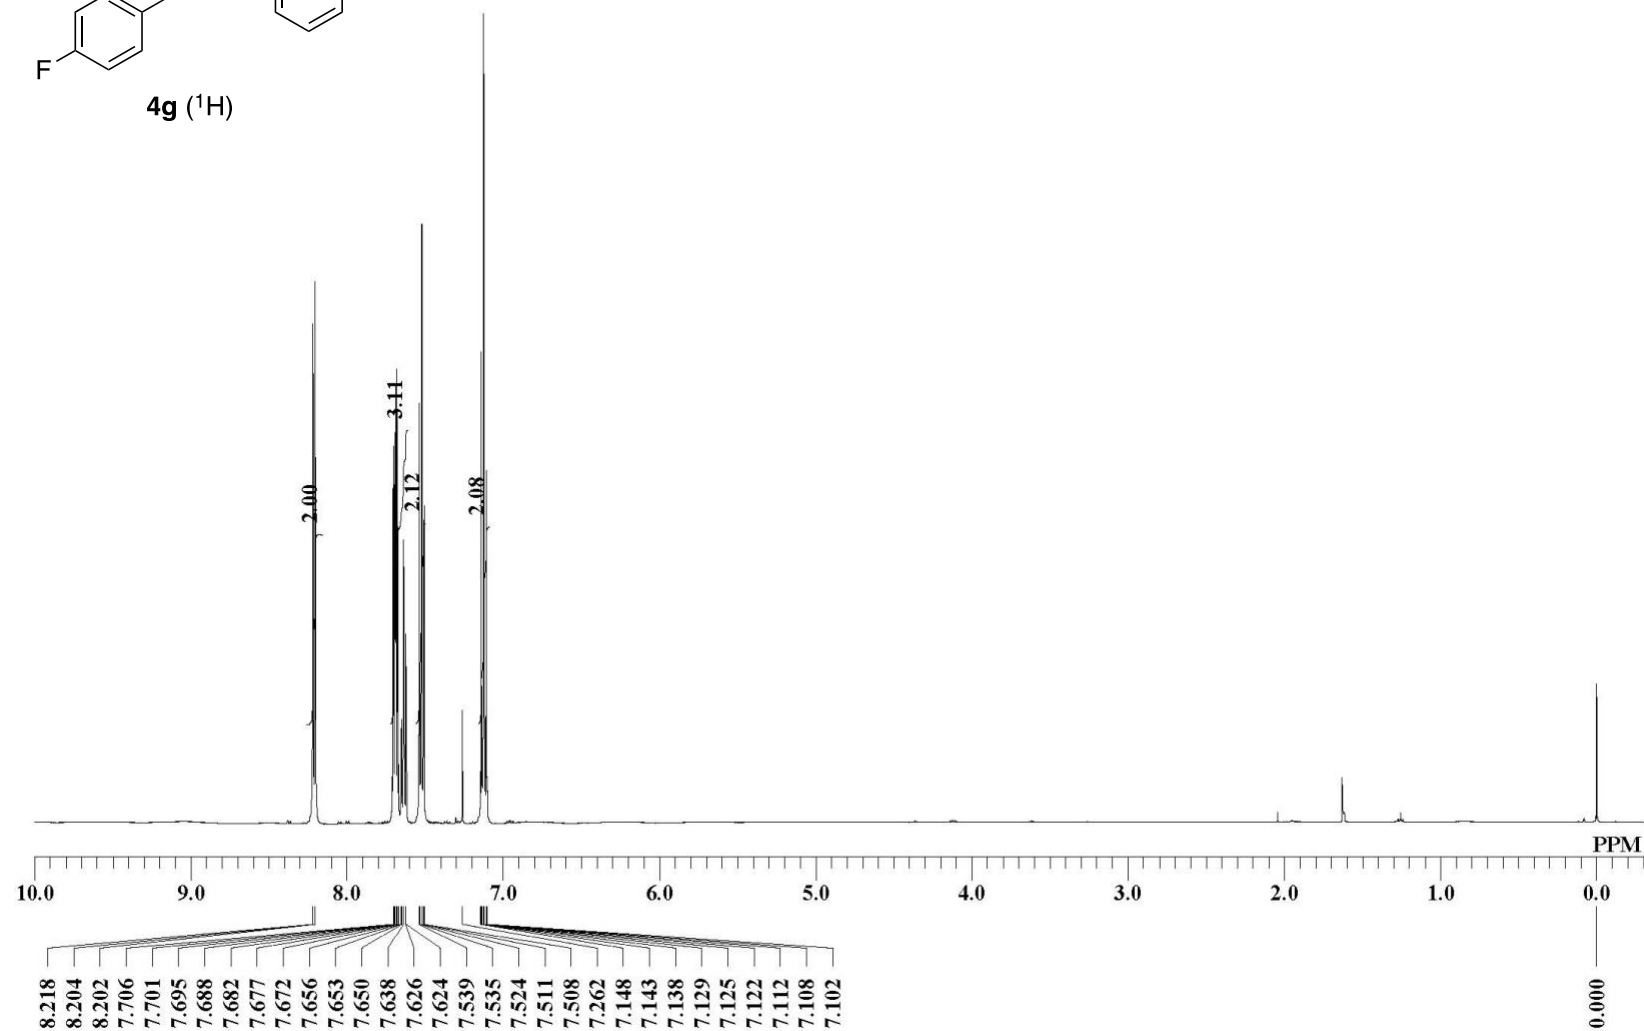

7KH-7-fraction-1H

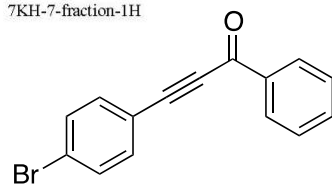

**4h** (<sup>1</sup>H)

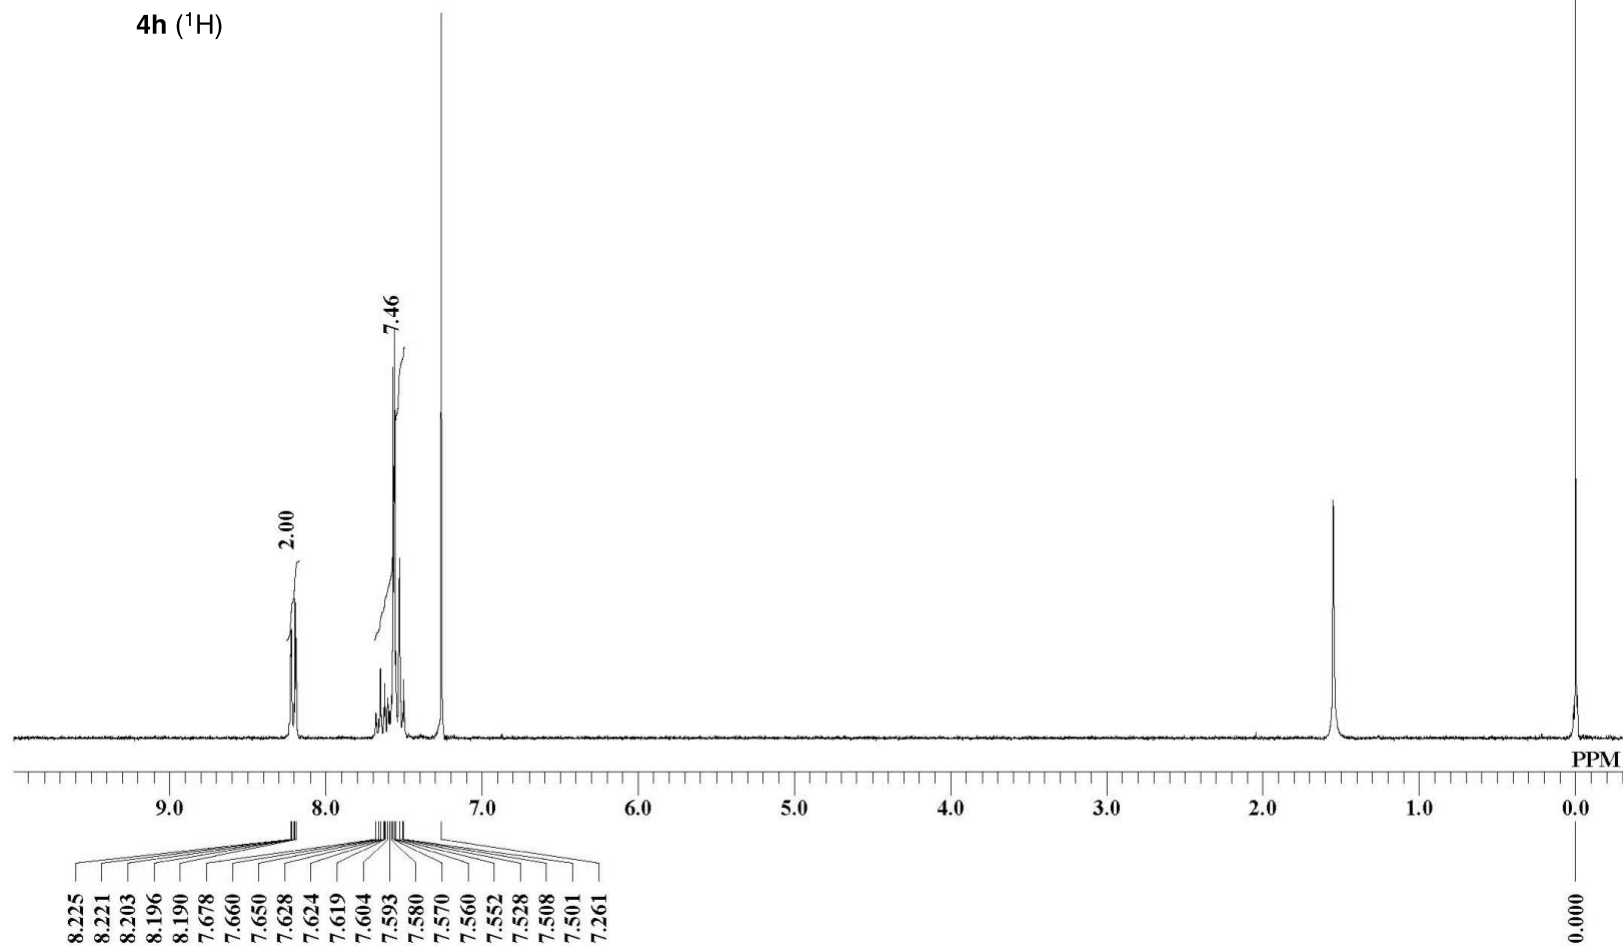

7KH-10-fraction-1H

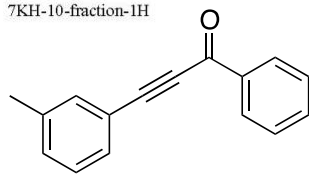

**4k** (<sup>1</sup>H)

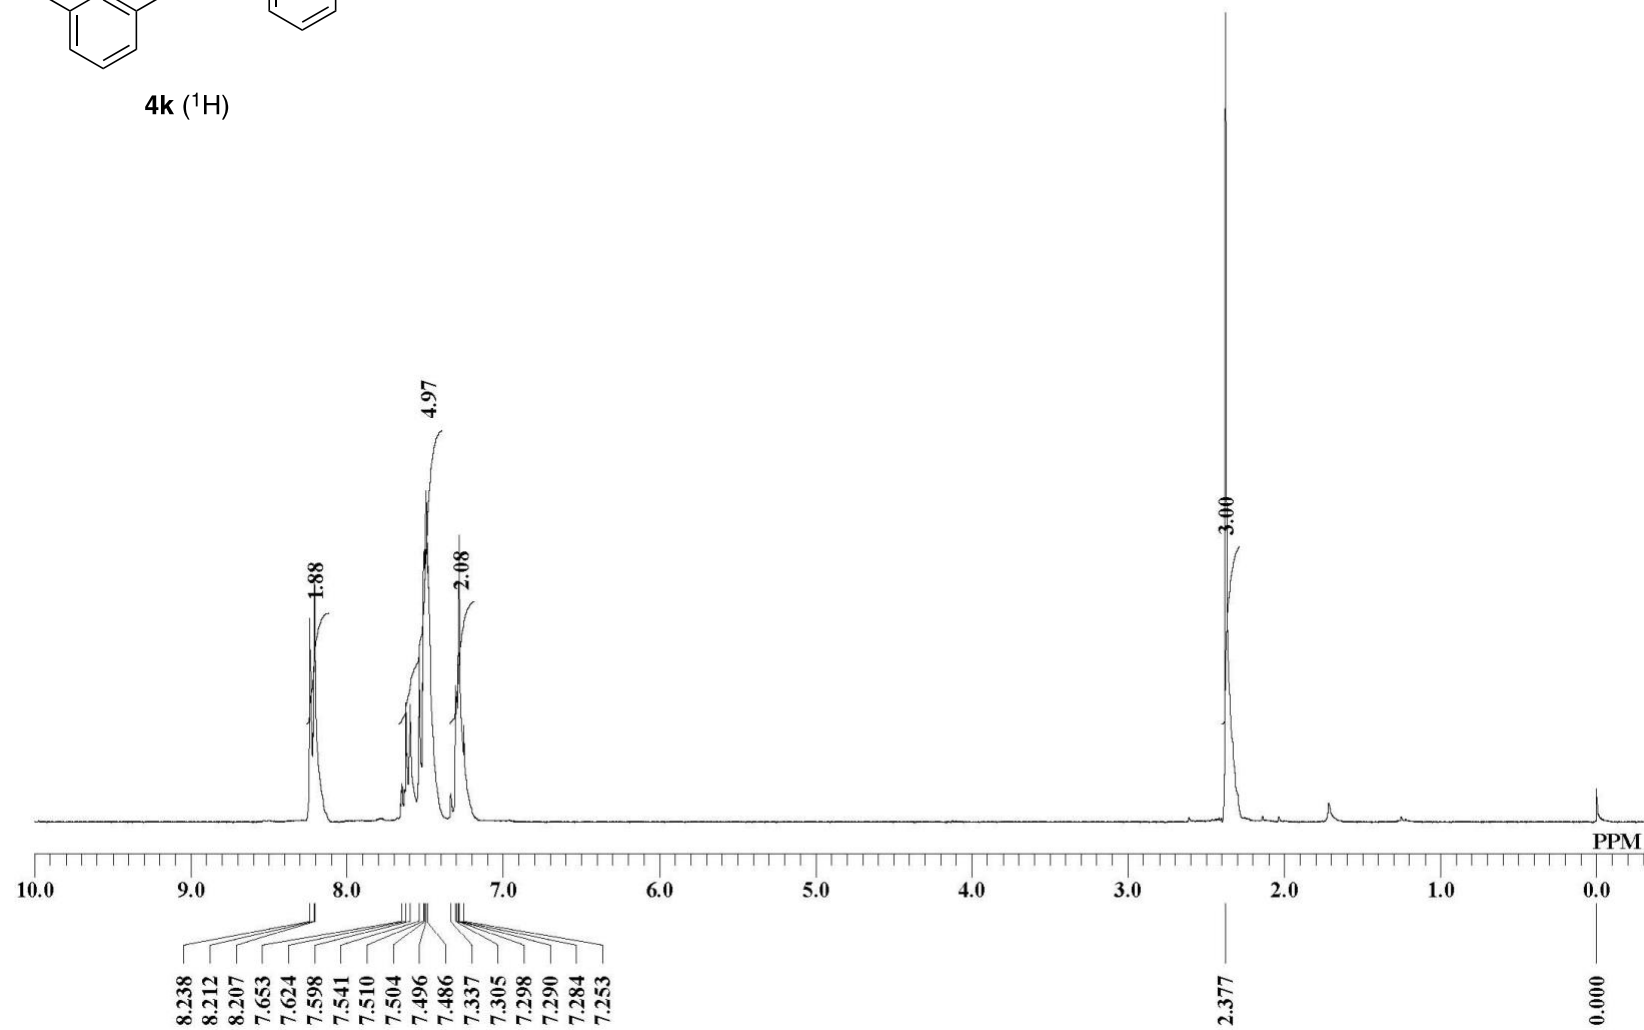

7KH-8-fraction1-1H-2

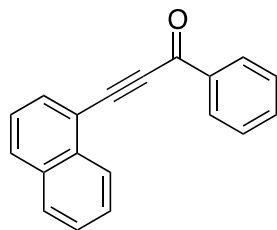

**4o** (<sup>1</sup>H)

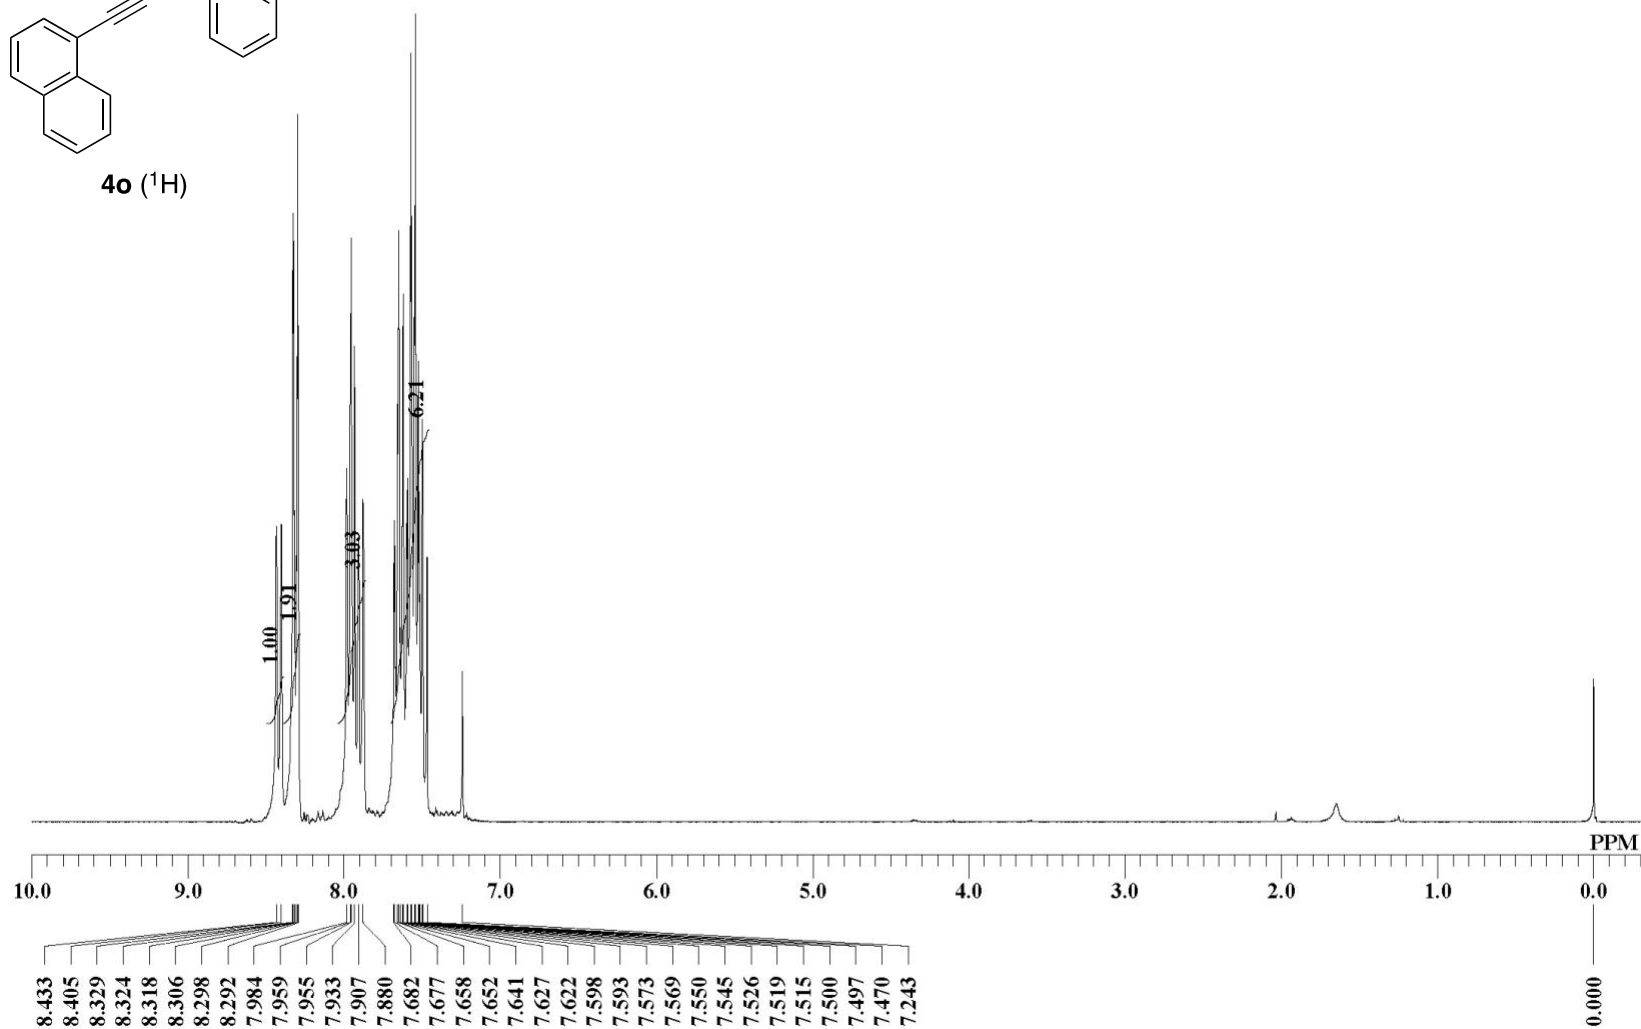

6KO-273 Fr

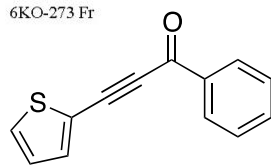

**4p** (<sup>1</sup>H)

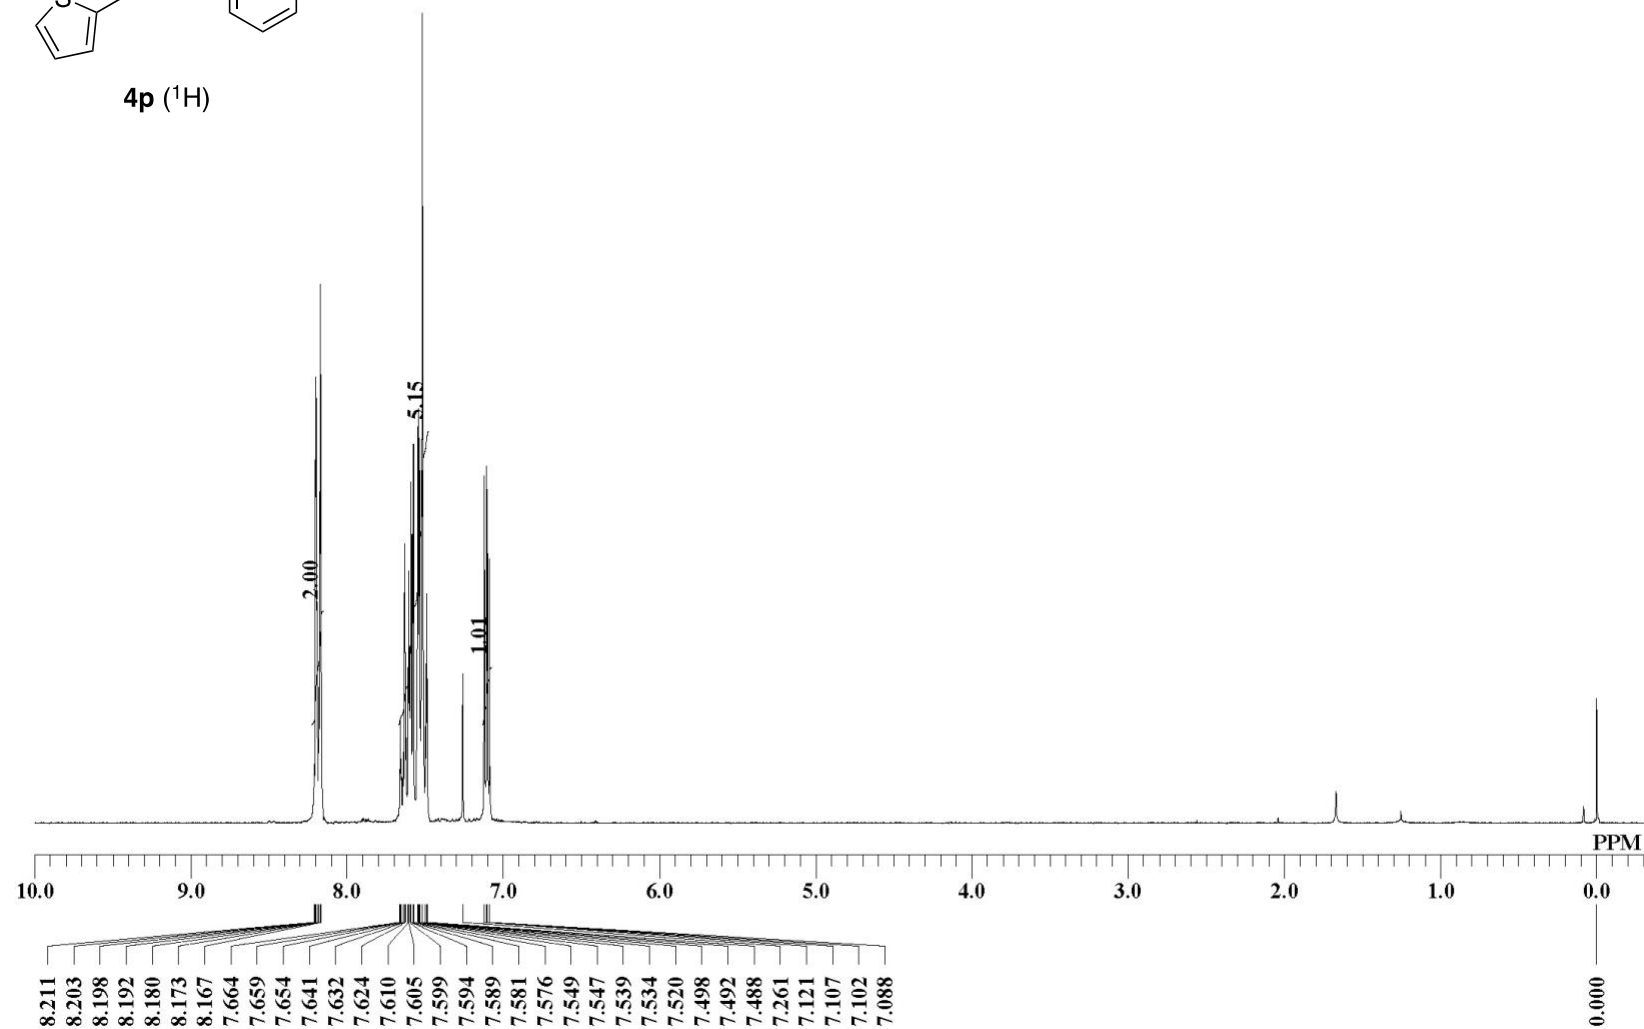

6KO-182 Fr

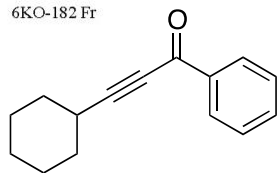

**4q** (<sup>1</sup>H)

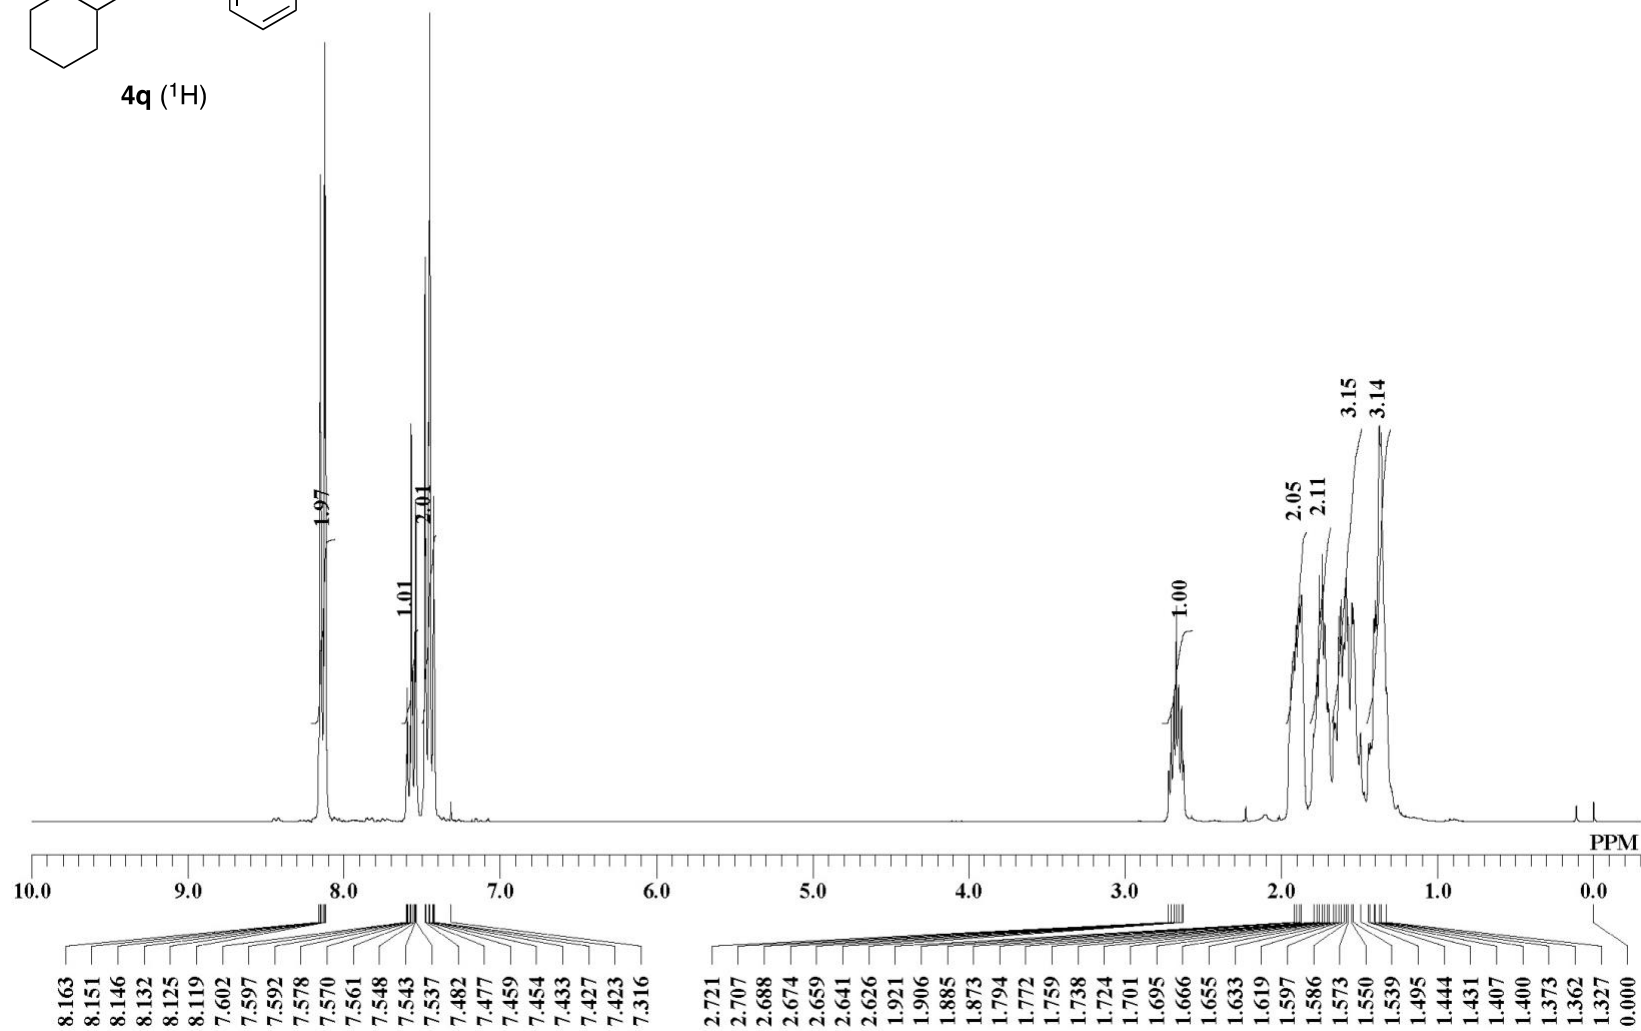

6KO-180 Fr 500MHz

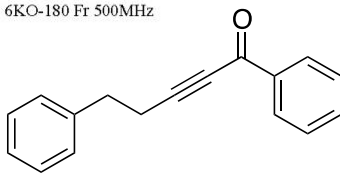

**4r** (<sup>1</sup>H)

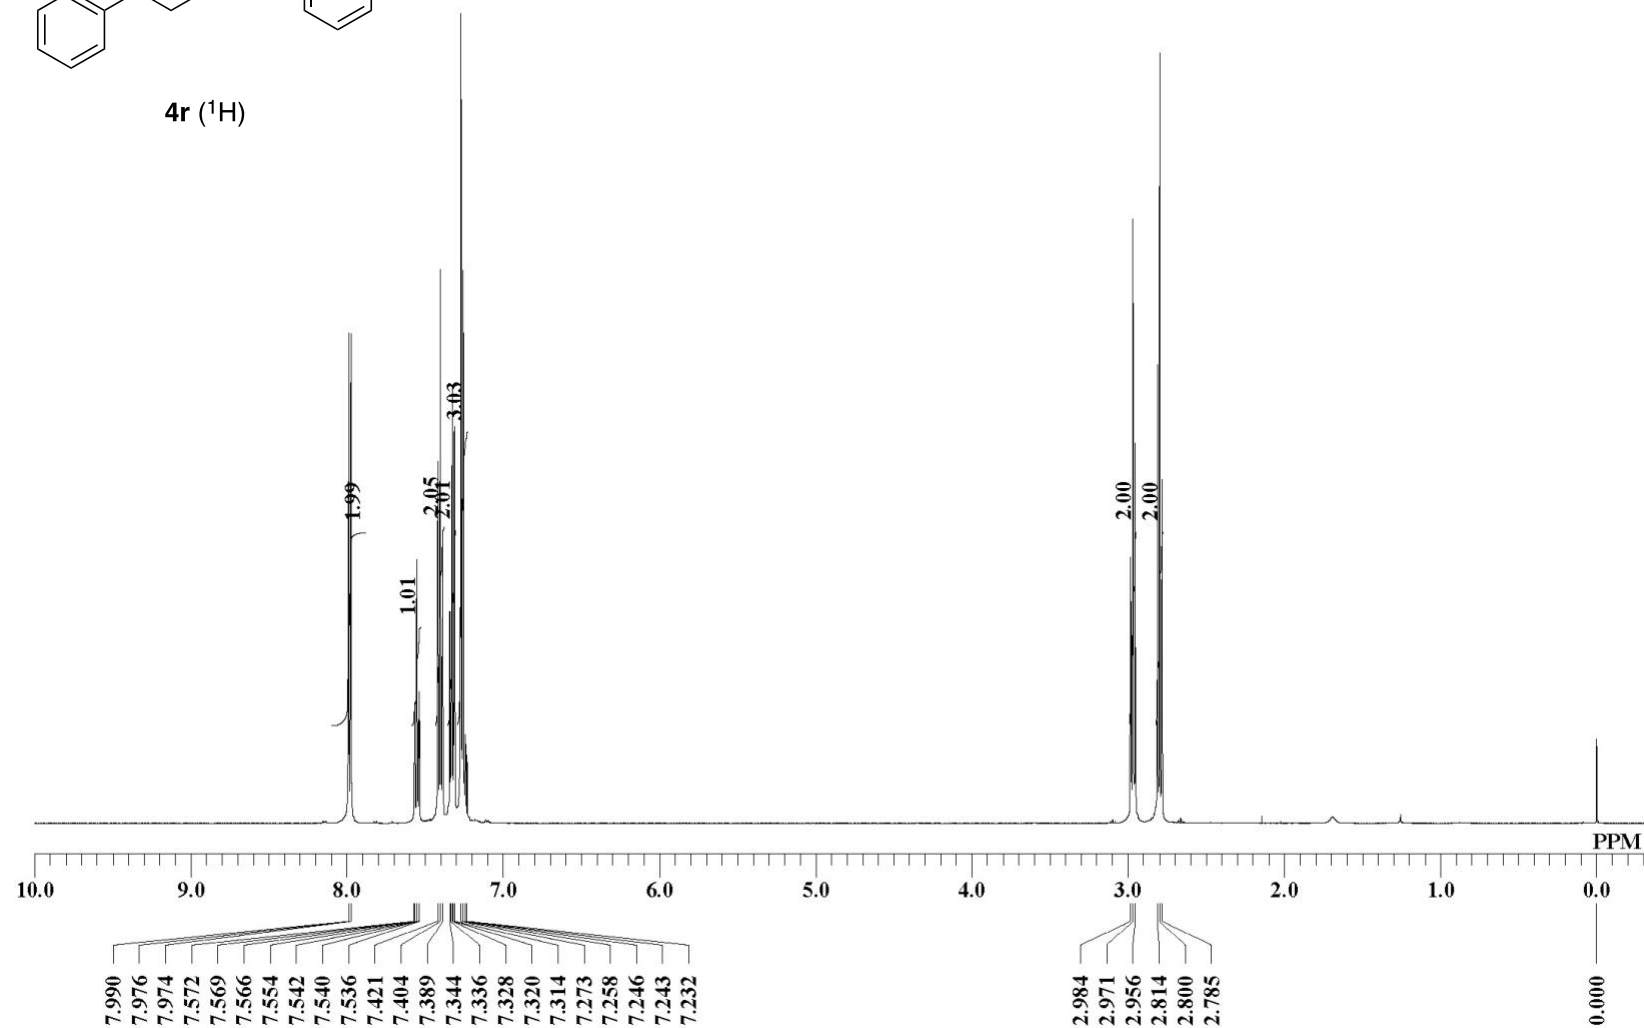

6KO-180 Fr  $^{13}\text{C}$

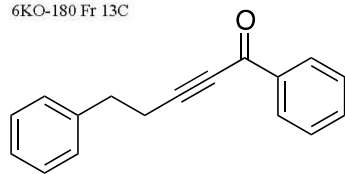

**4r** ( $^{13}\text{C}$ )

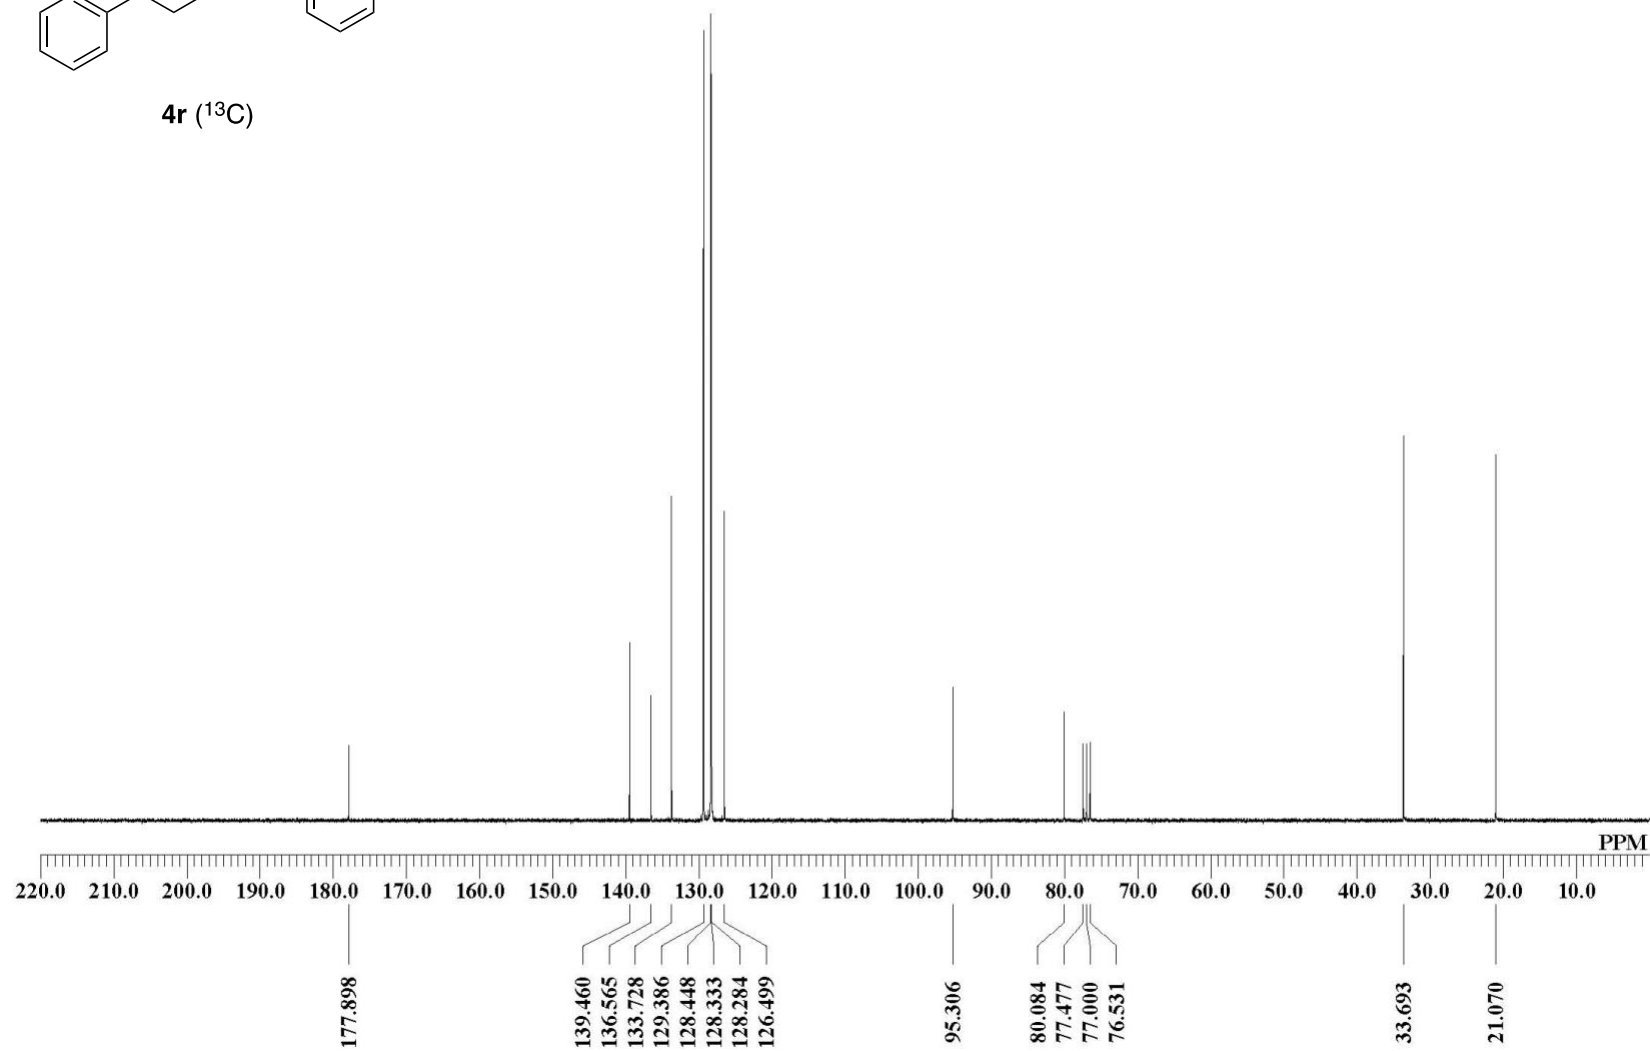

6KO-202 Fr

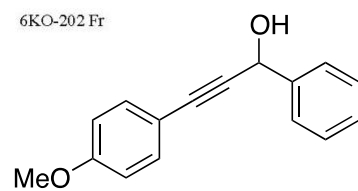

**4d'** ( $^1\text{H}$ )

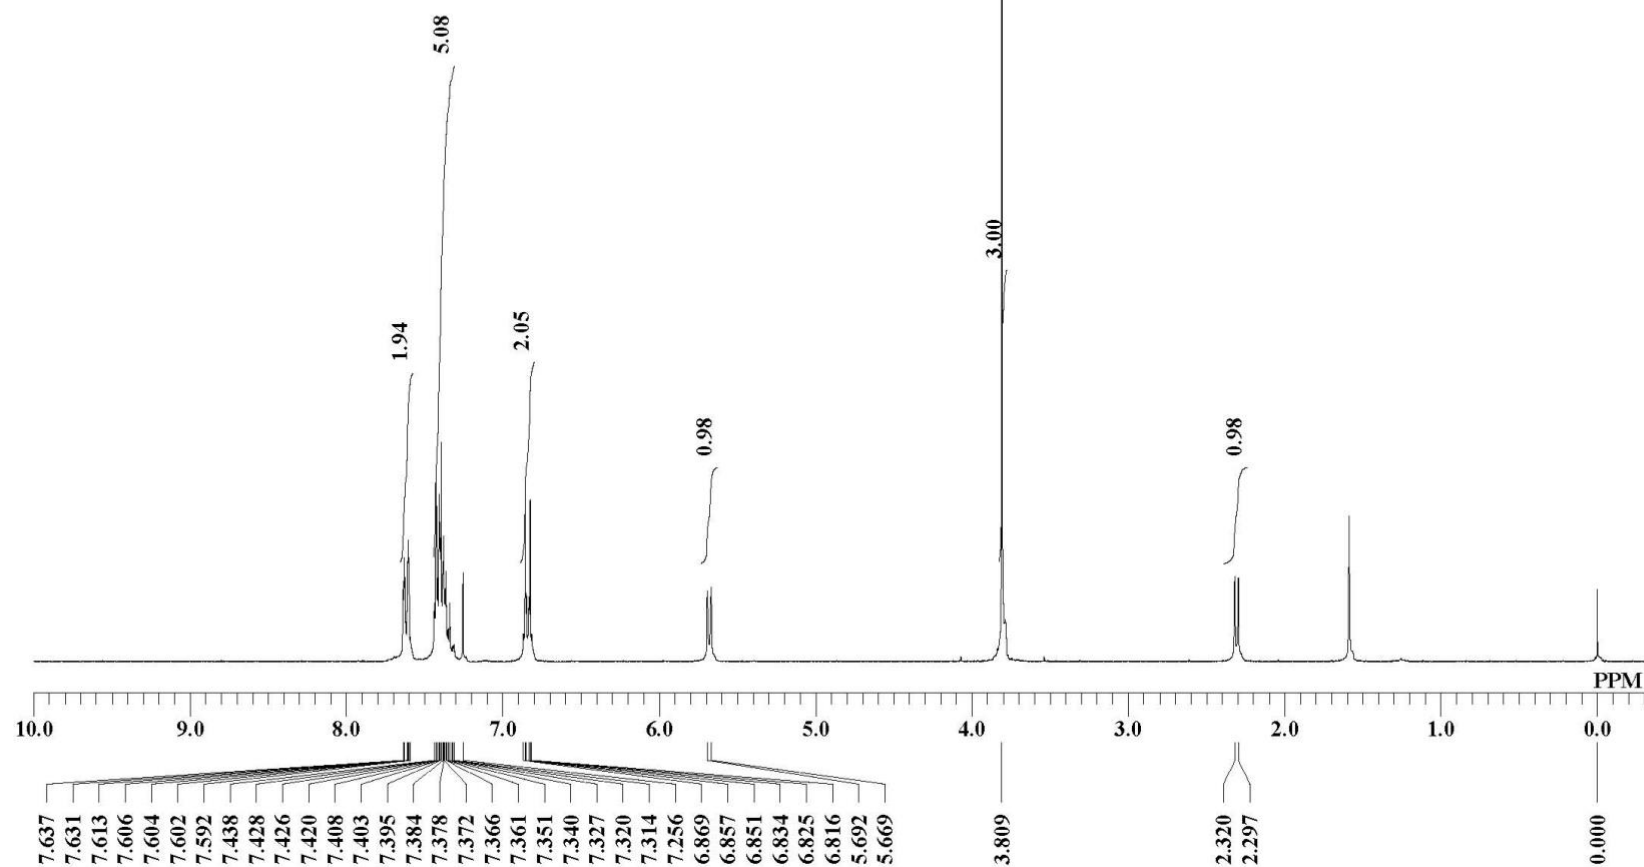

6KO-202 Fr 13C

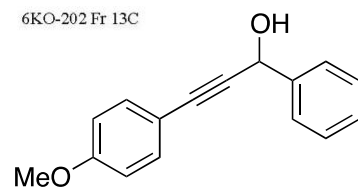

**4d'** (<sup>13</sup>C)

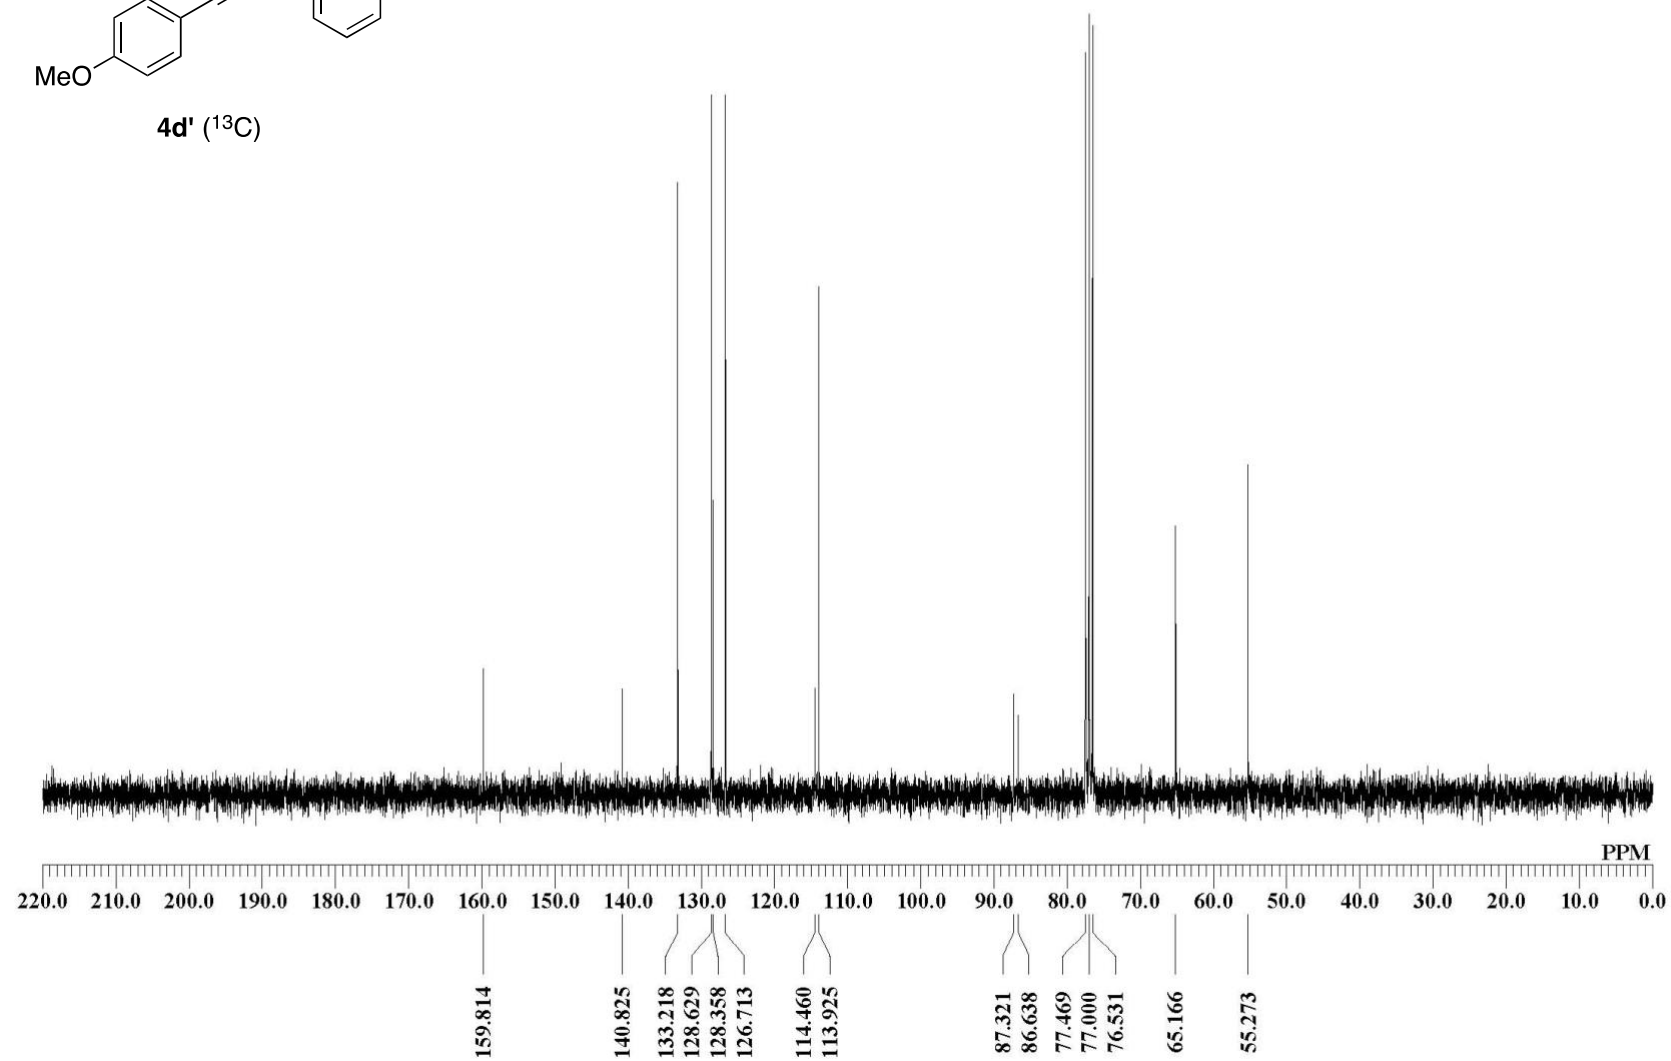

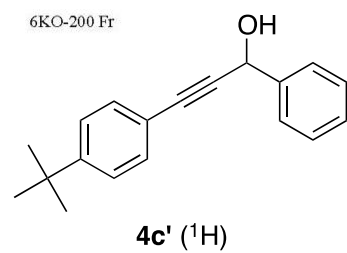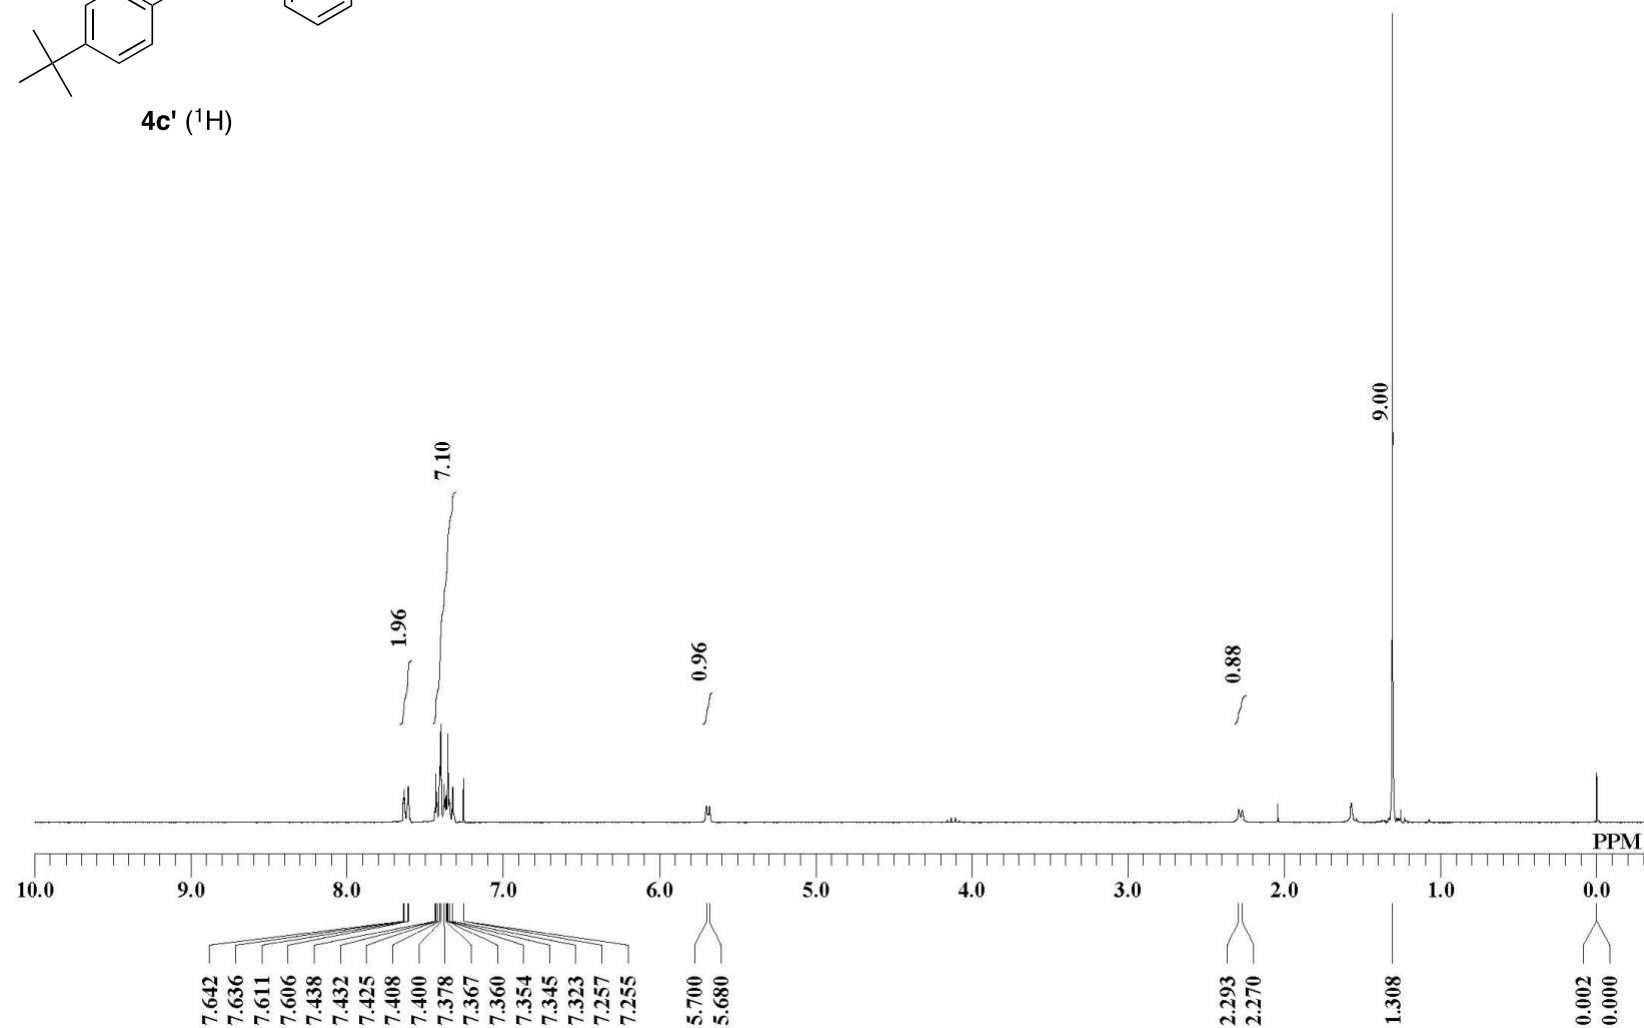

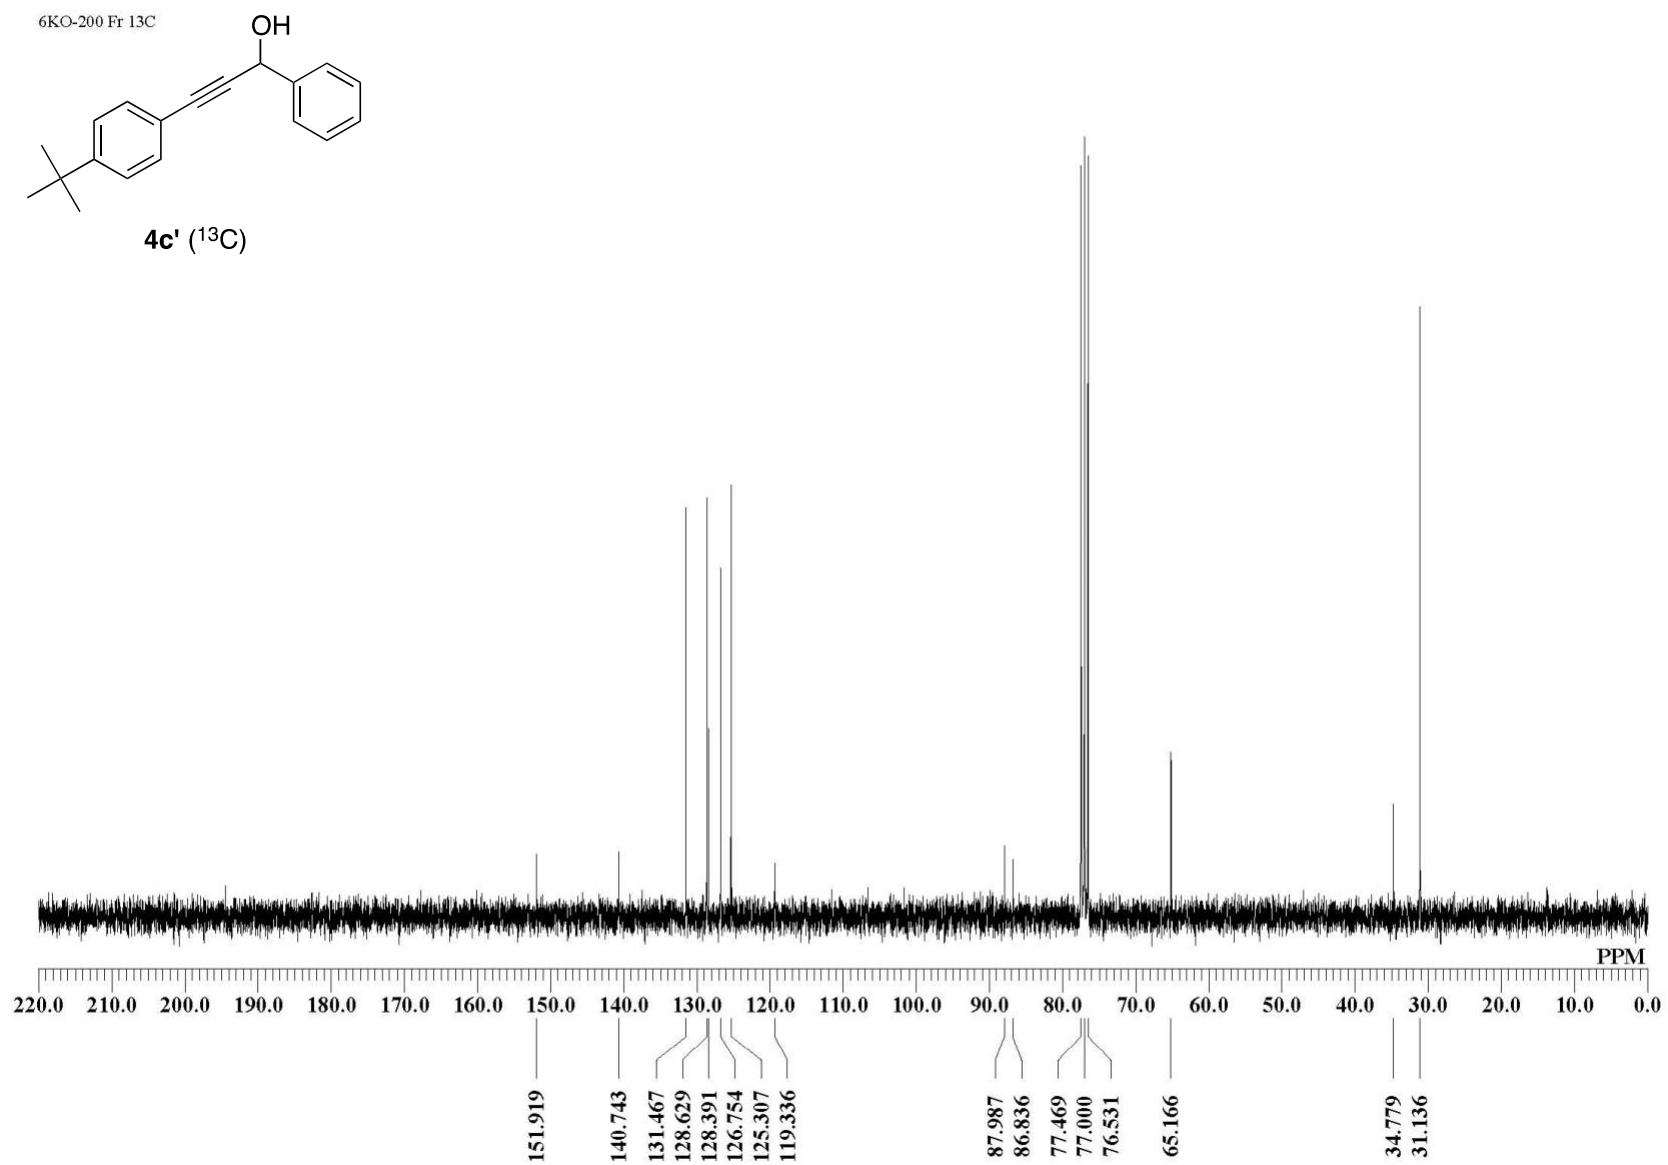

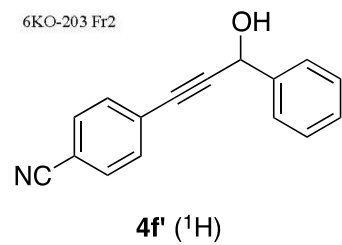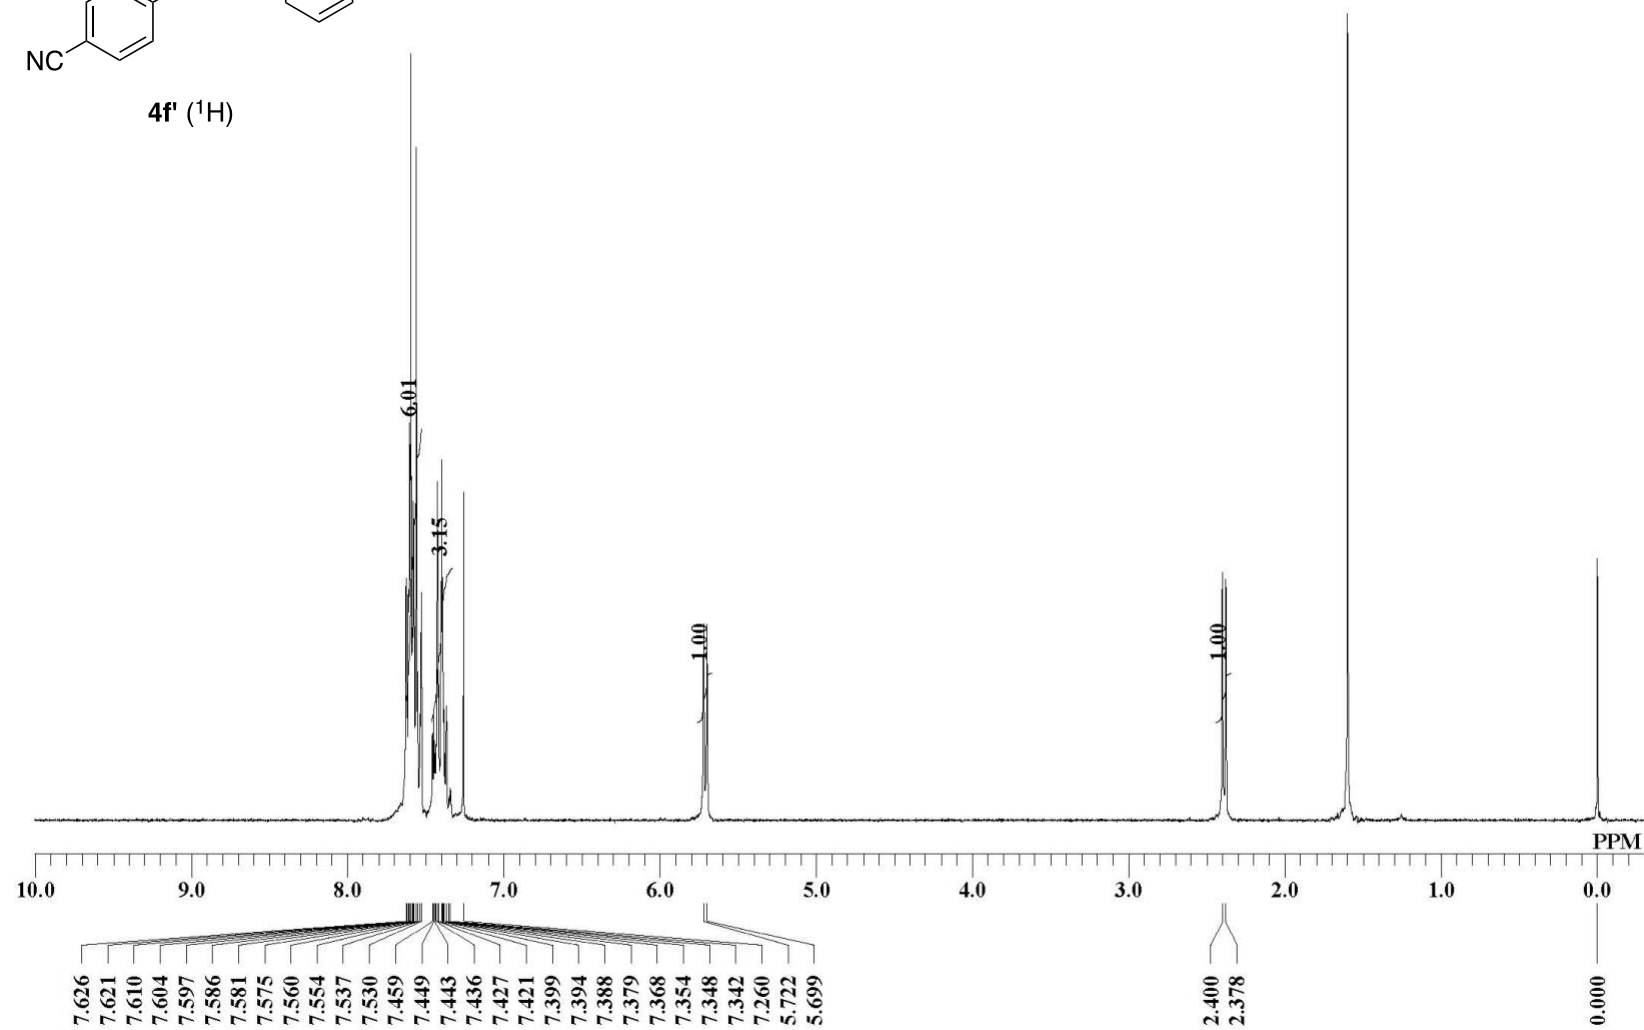

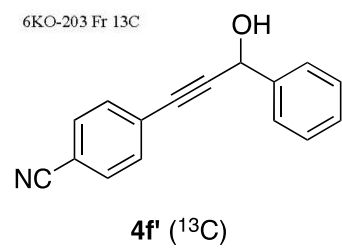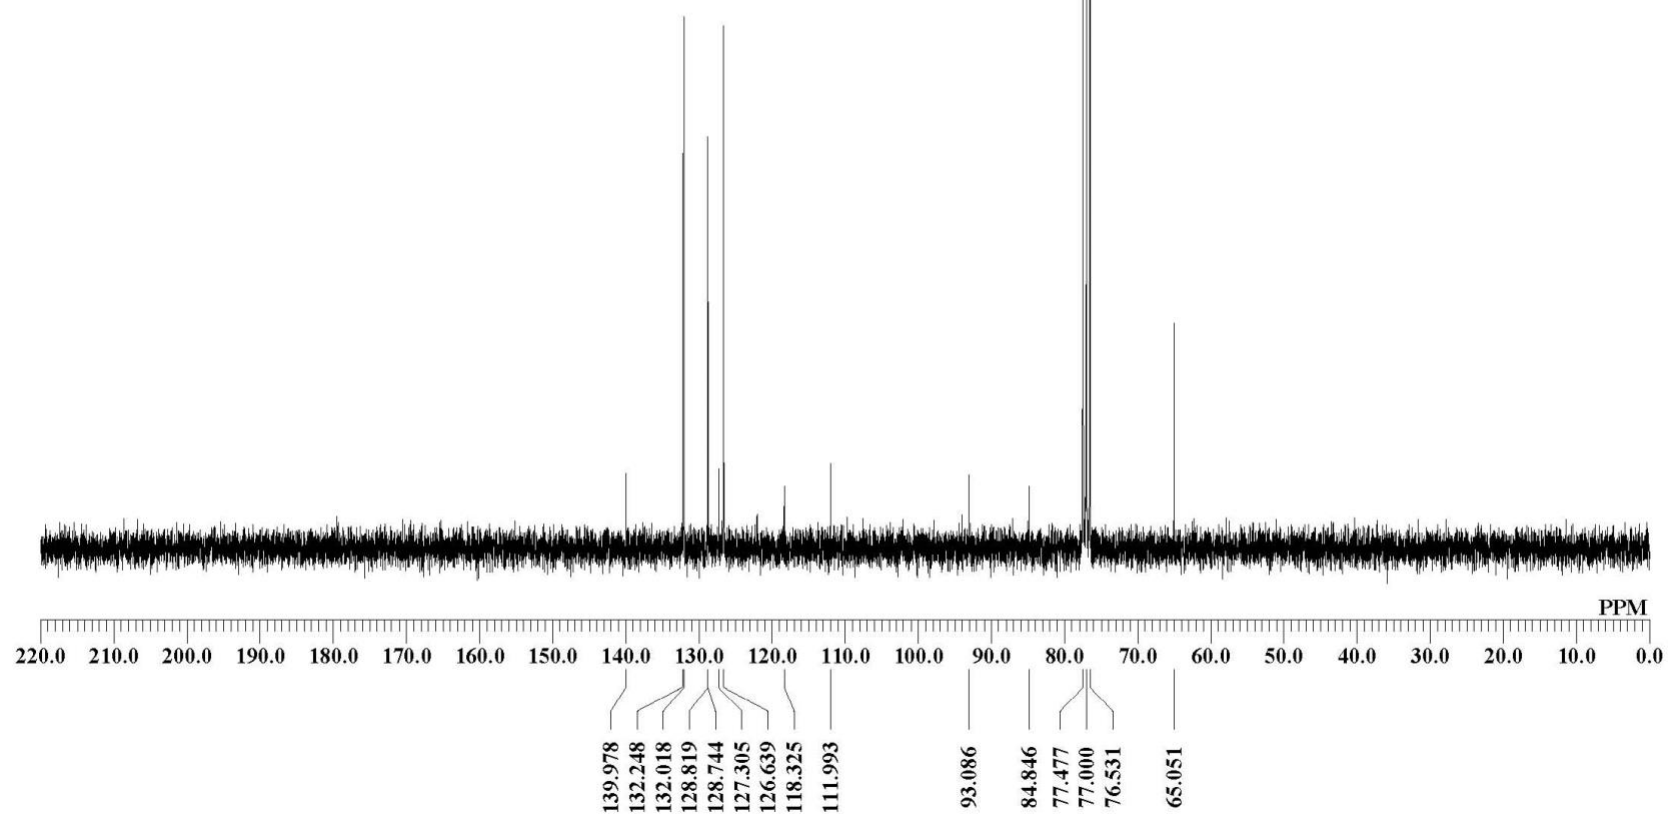

6KO-222 Fr

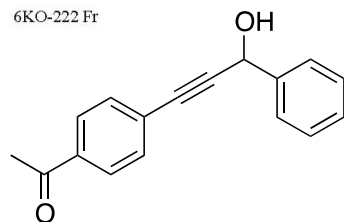

4i' ( $^1\text{H}$ )

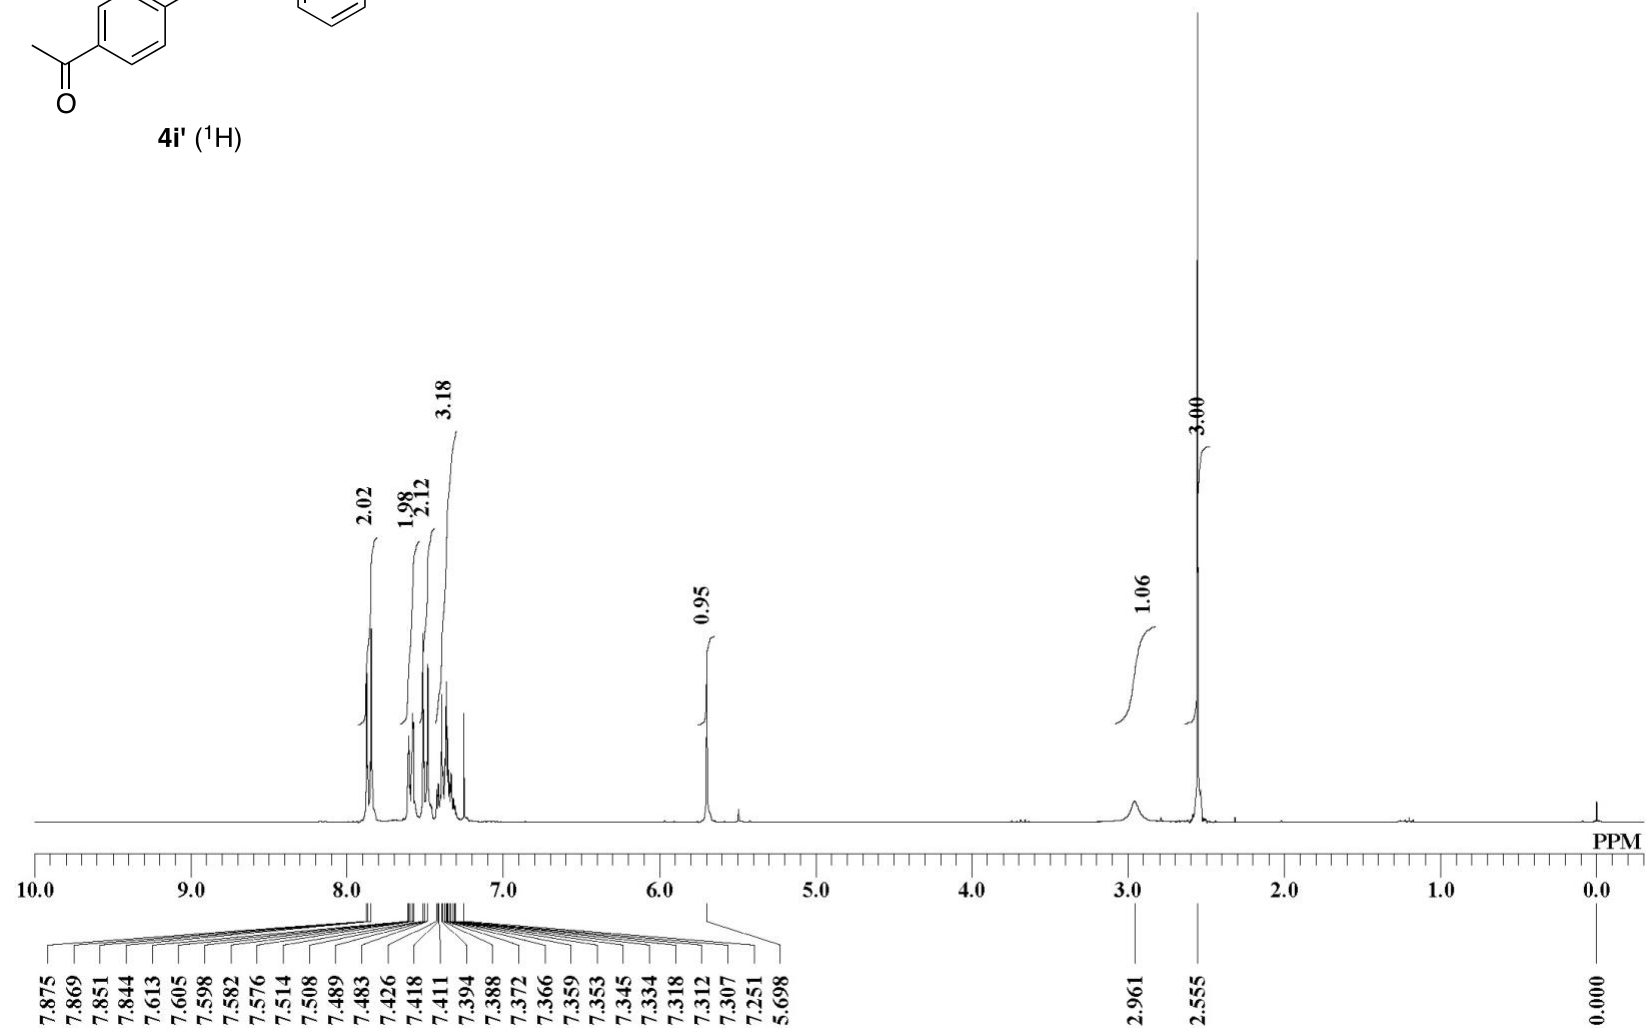

6KO-222 Fr  $^{13}\text{C}$

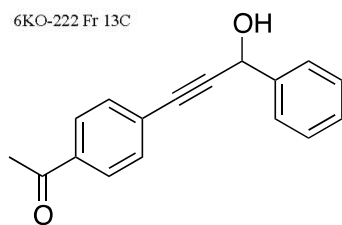

**4i'** ( $^{13}\text{C}$ )

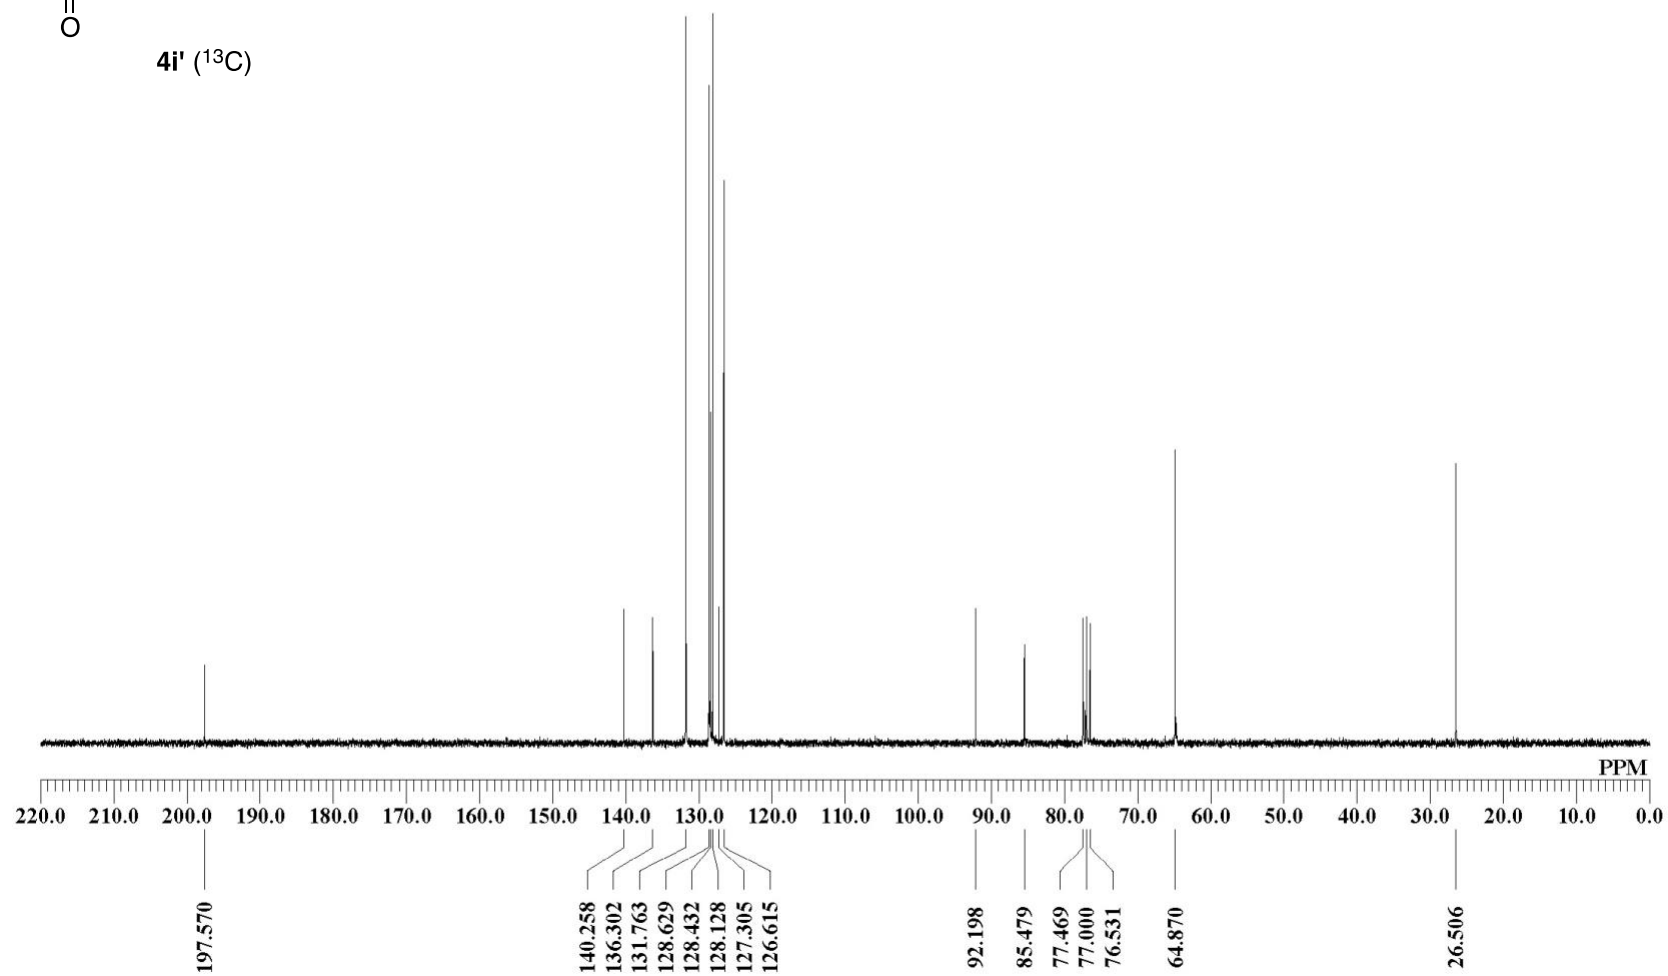

6KO-204 Fr2

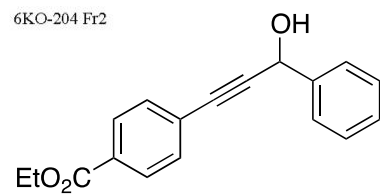

4j' (<sup>1</sup>H)

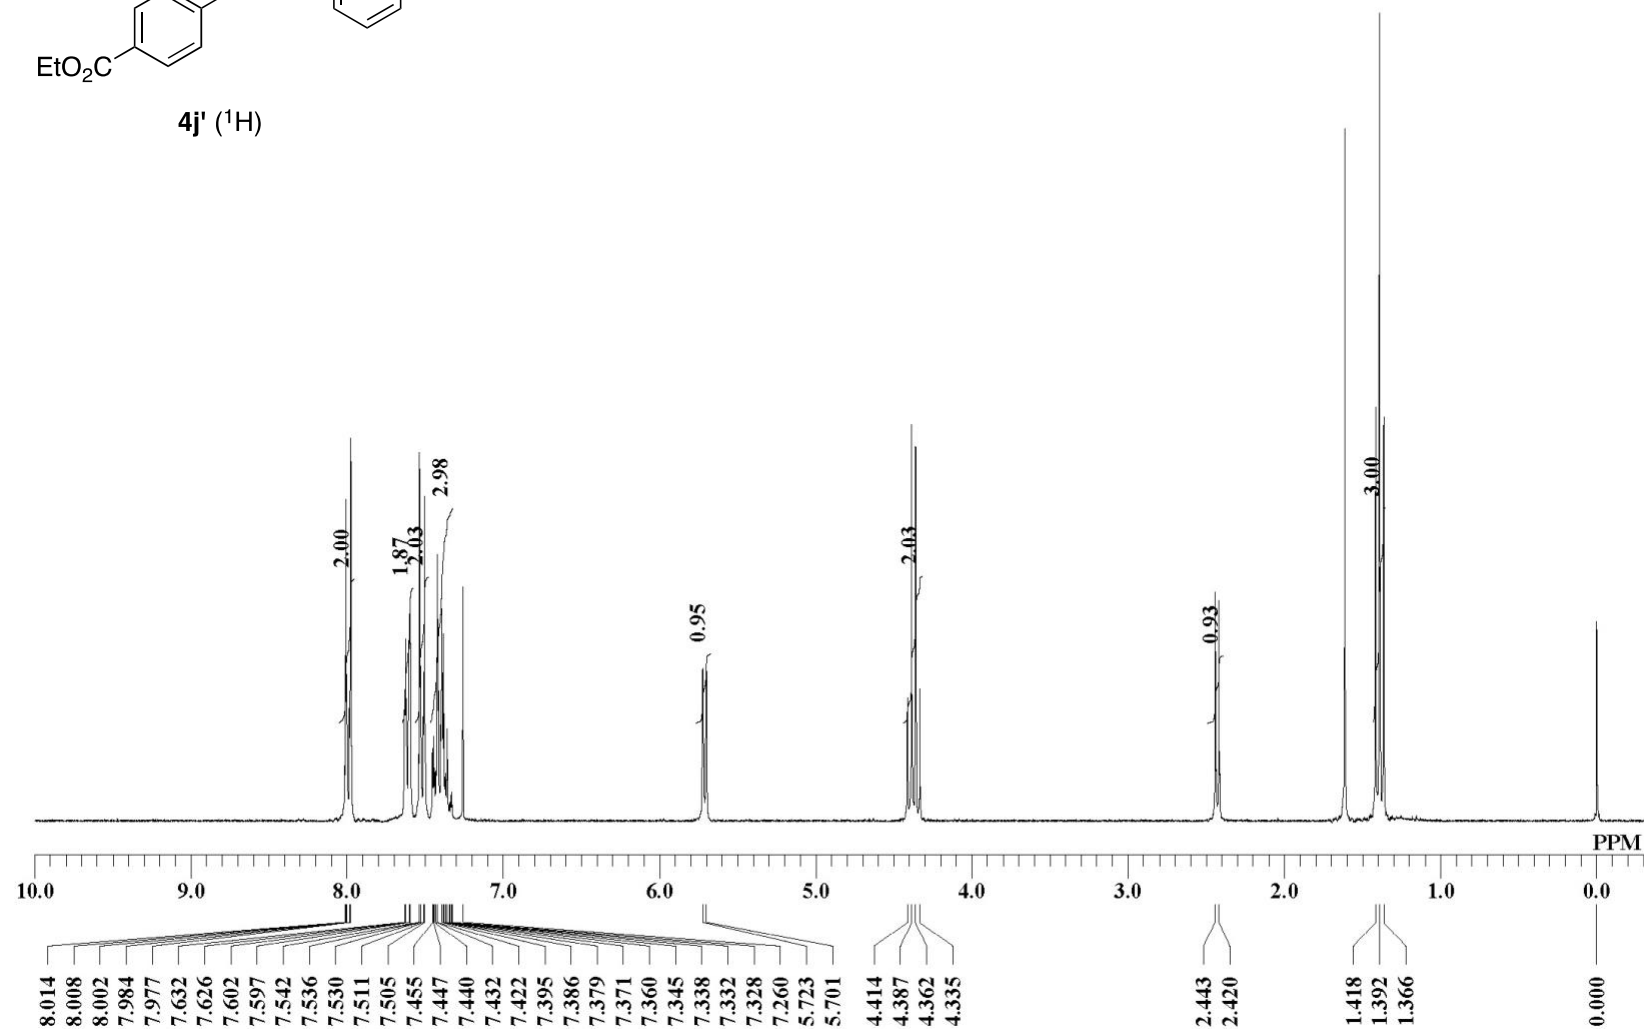

6KO-204 Fr  $^{13}\text{C}$

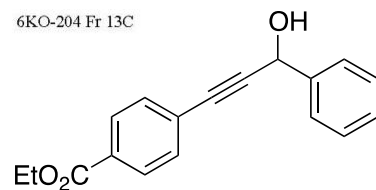

**4j'** ( $^{13}\text{C}$ )

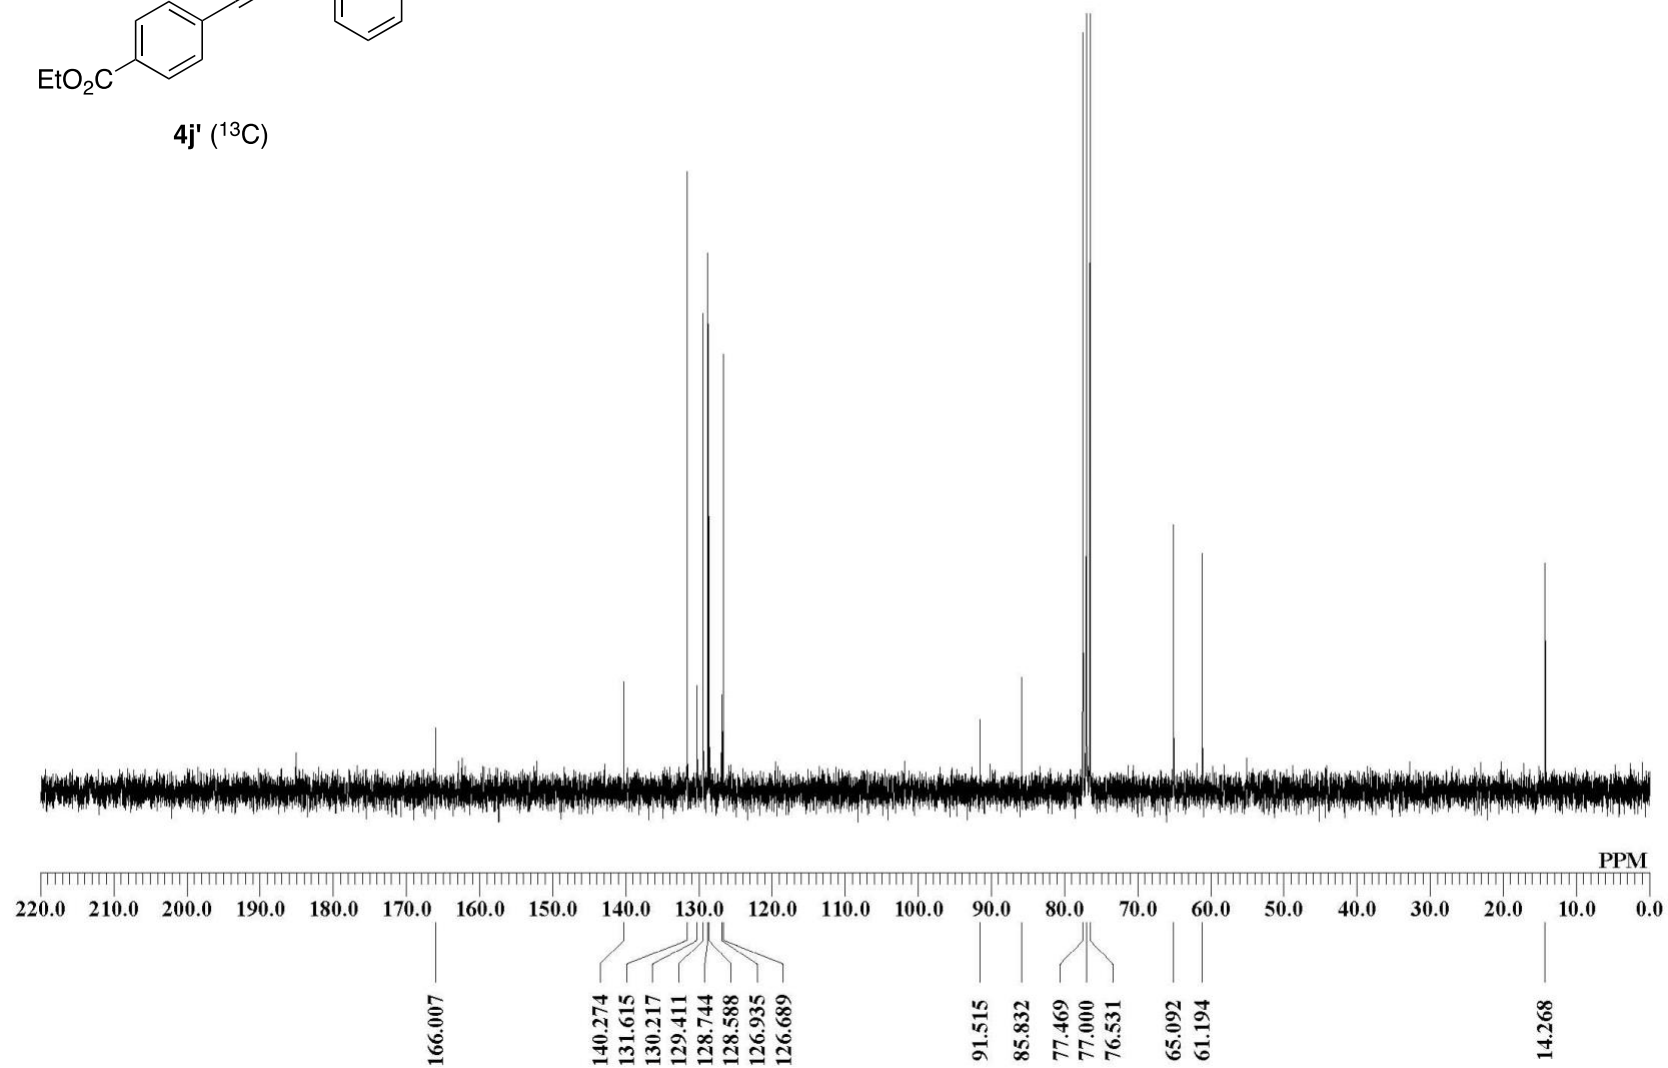

6KO-221 Fr3

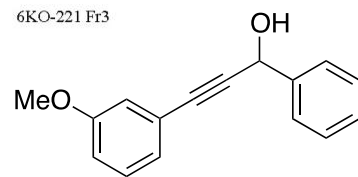

4I' (<sup>1</sup>H)

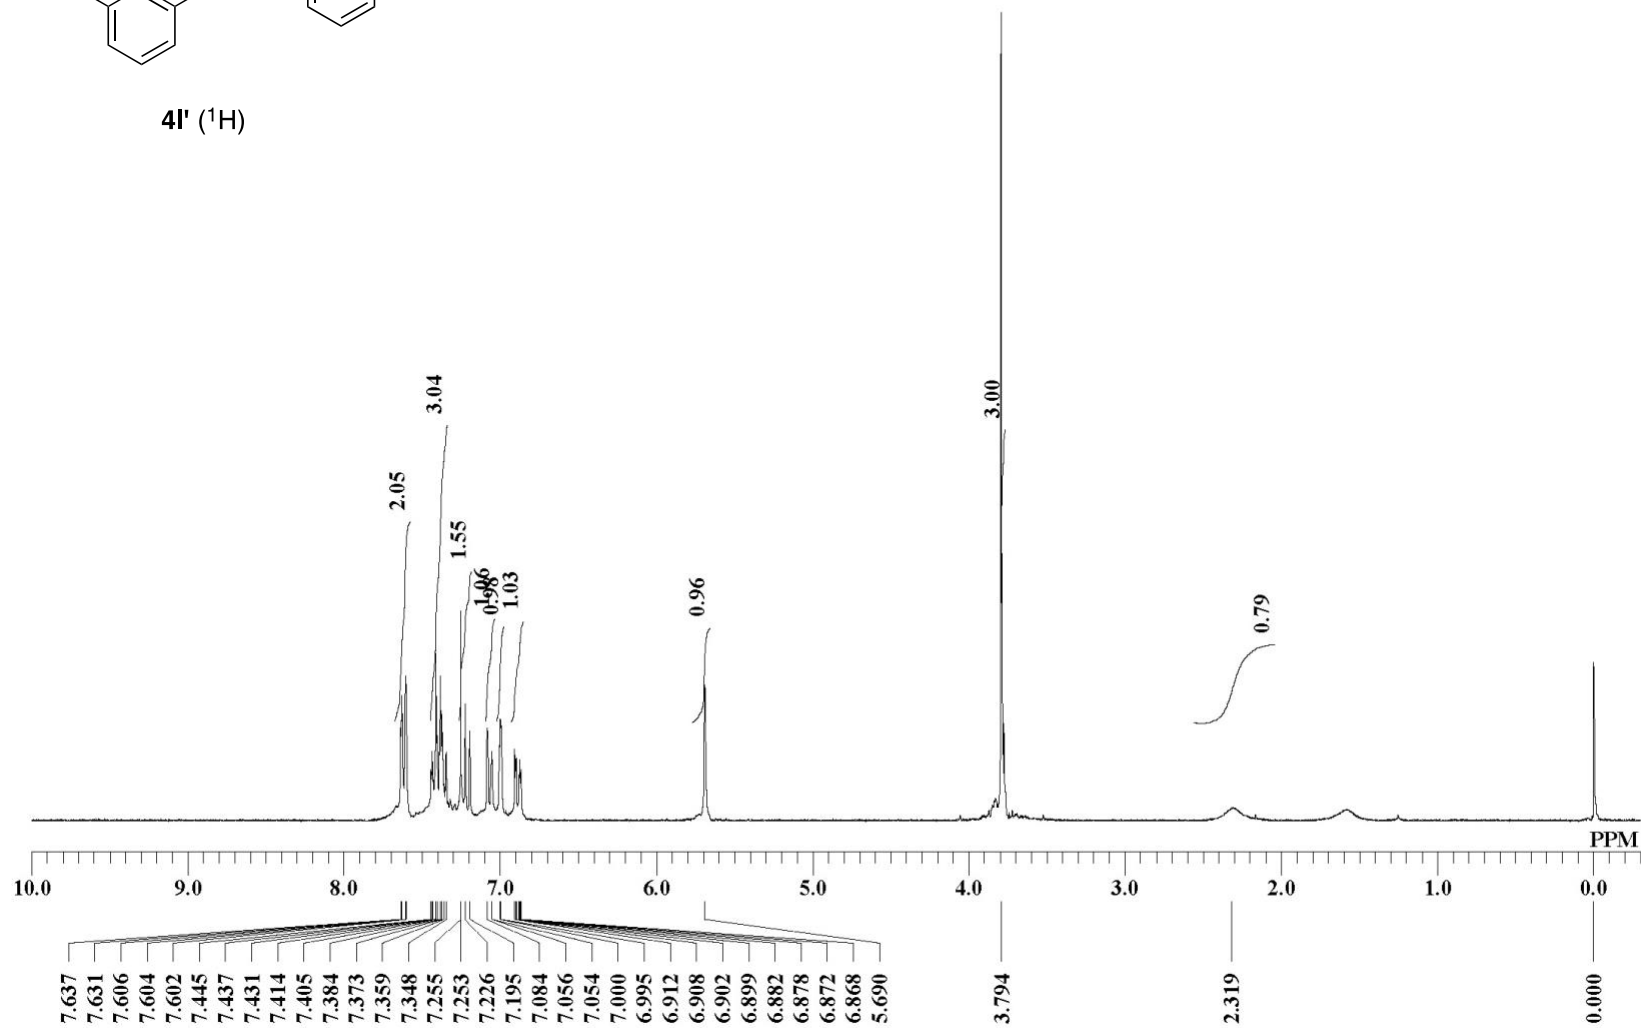

6KO-221 Fr  $^{13}\text{C}$

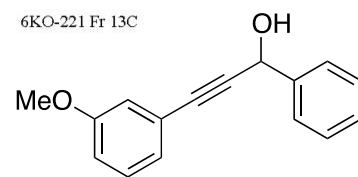

**4I'** ( $^{13}\text{C}$ )

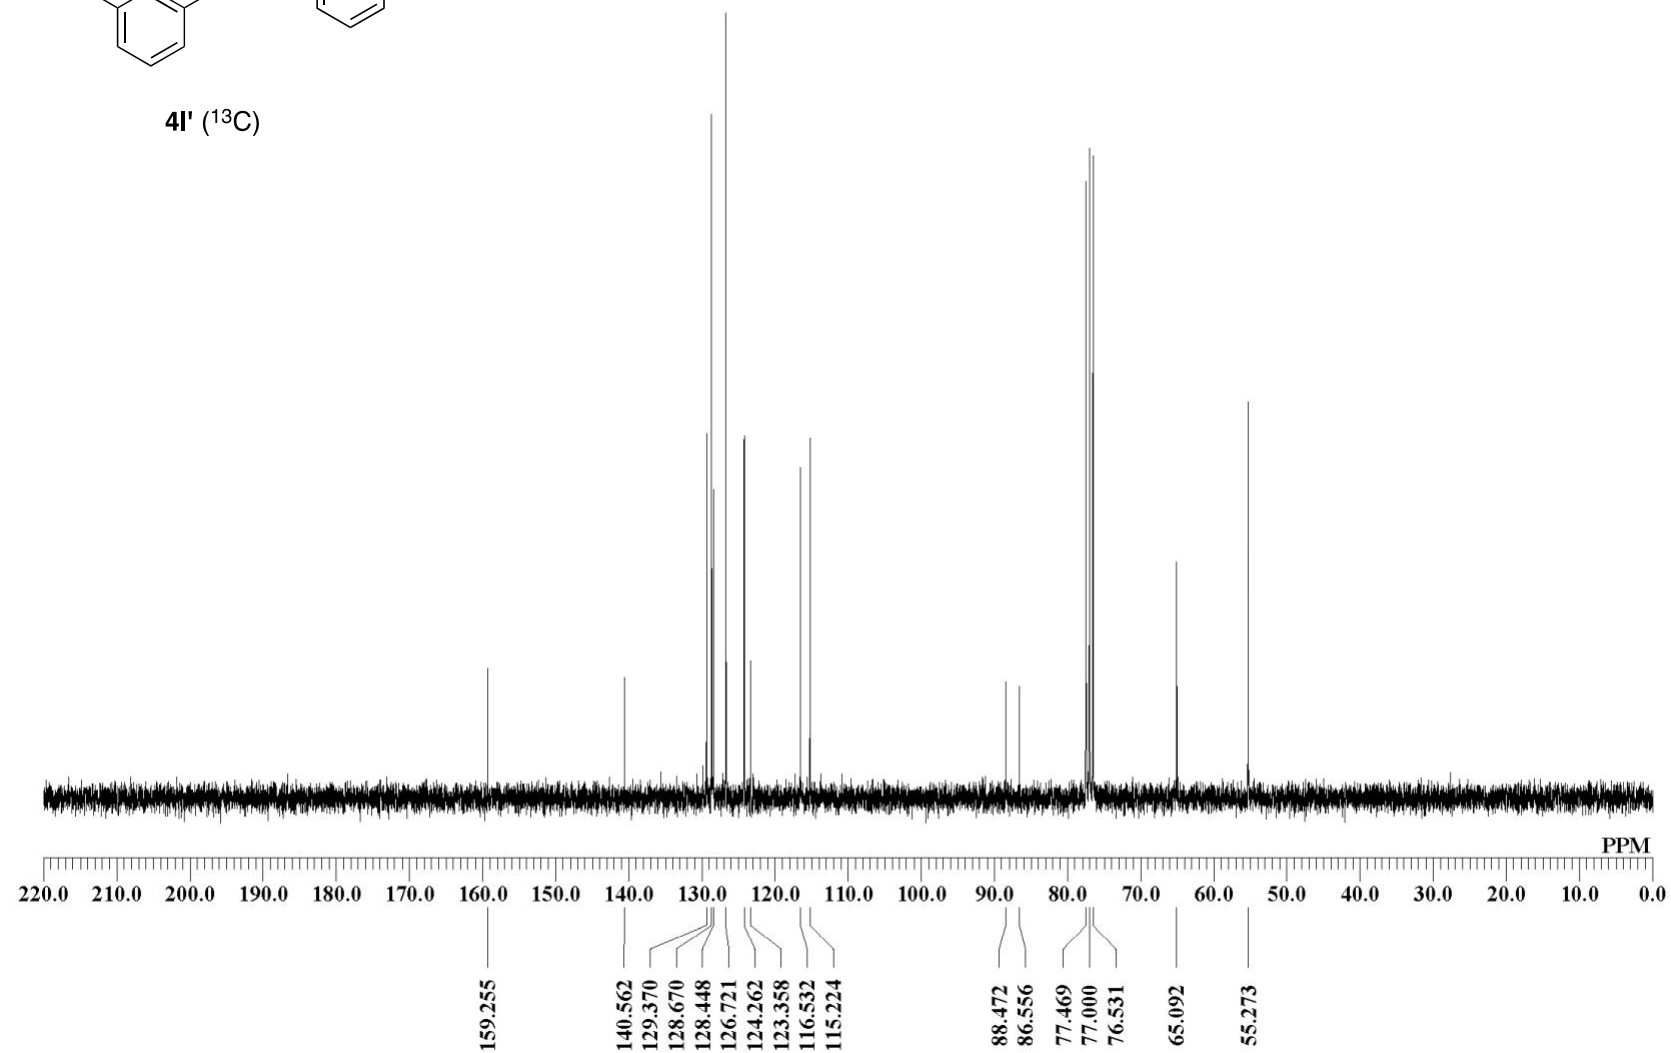

6KO-220 Fr2

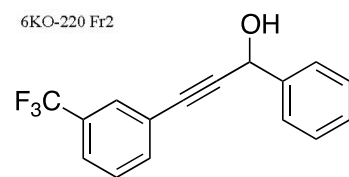

4m' (<sup>1</sup>H)

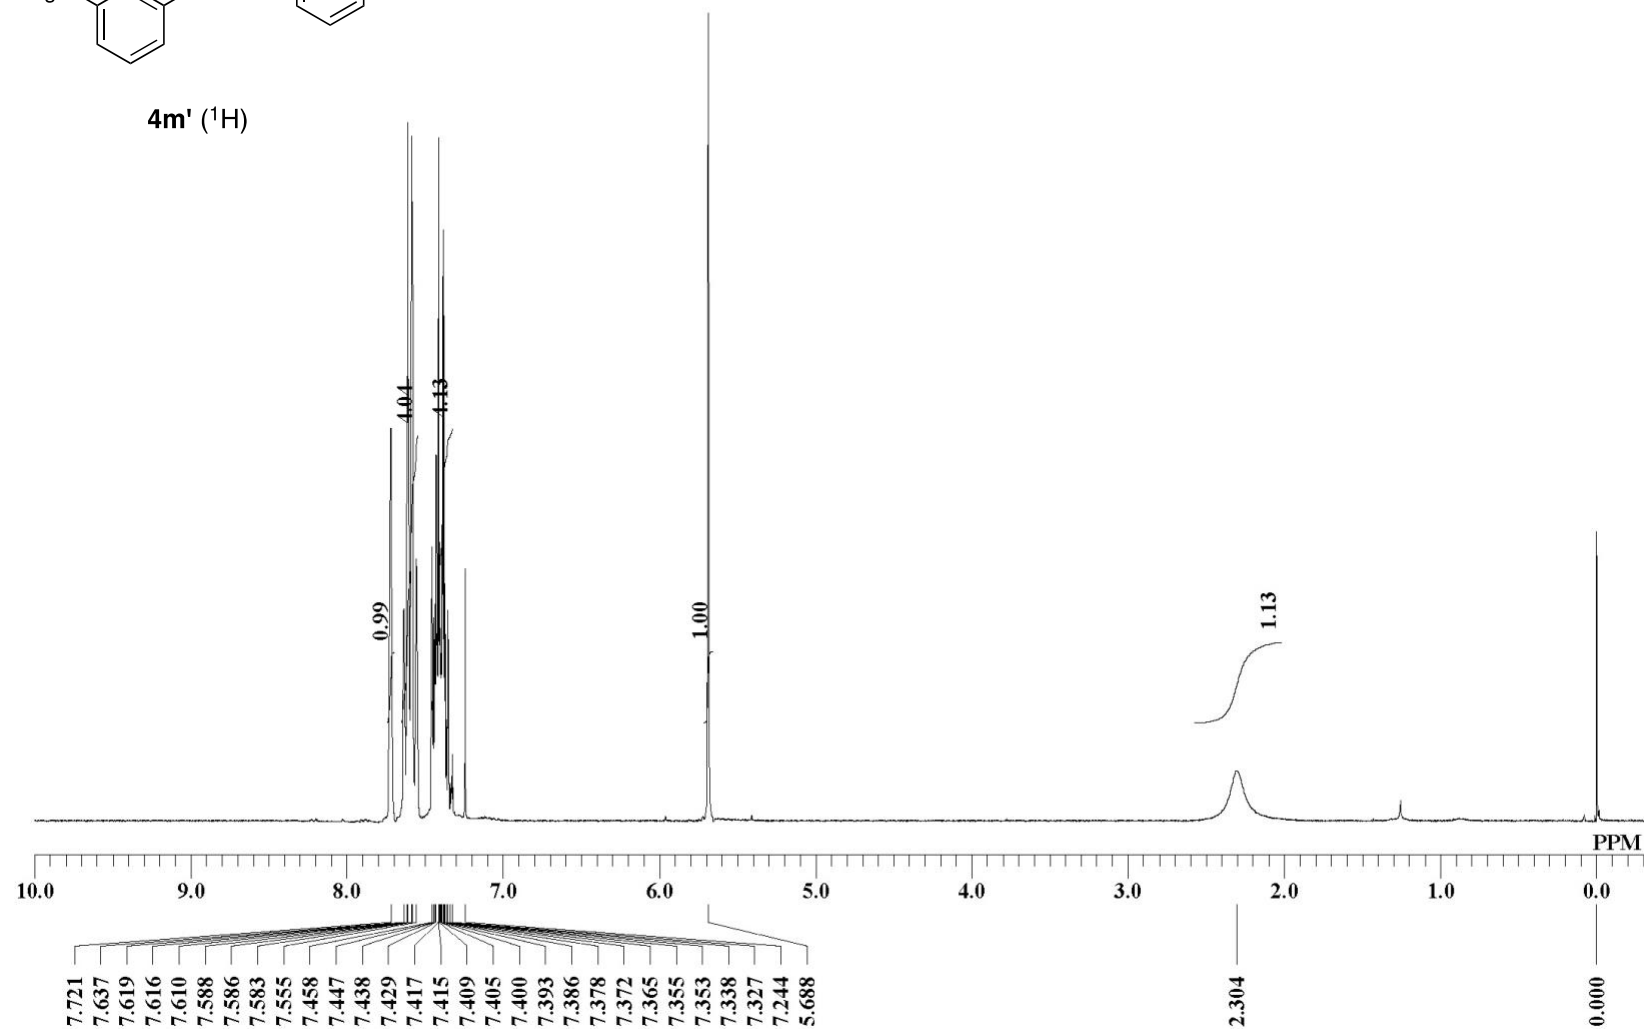

6KO-220 Fr 13C 500MHz

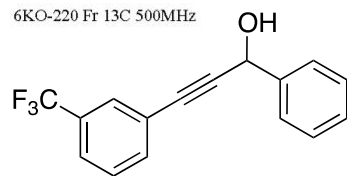

**4m'** (<sup>13</sup>C)

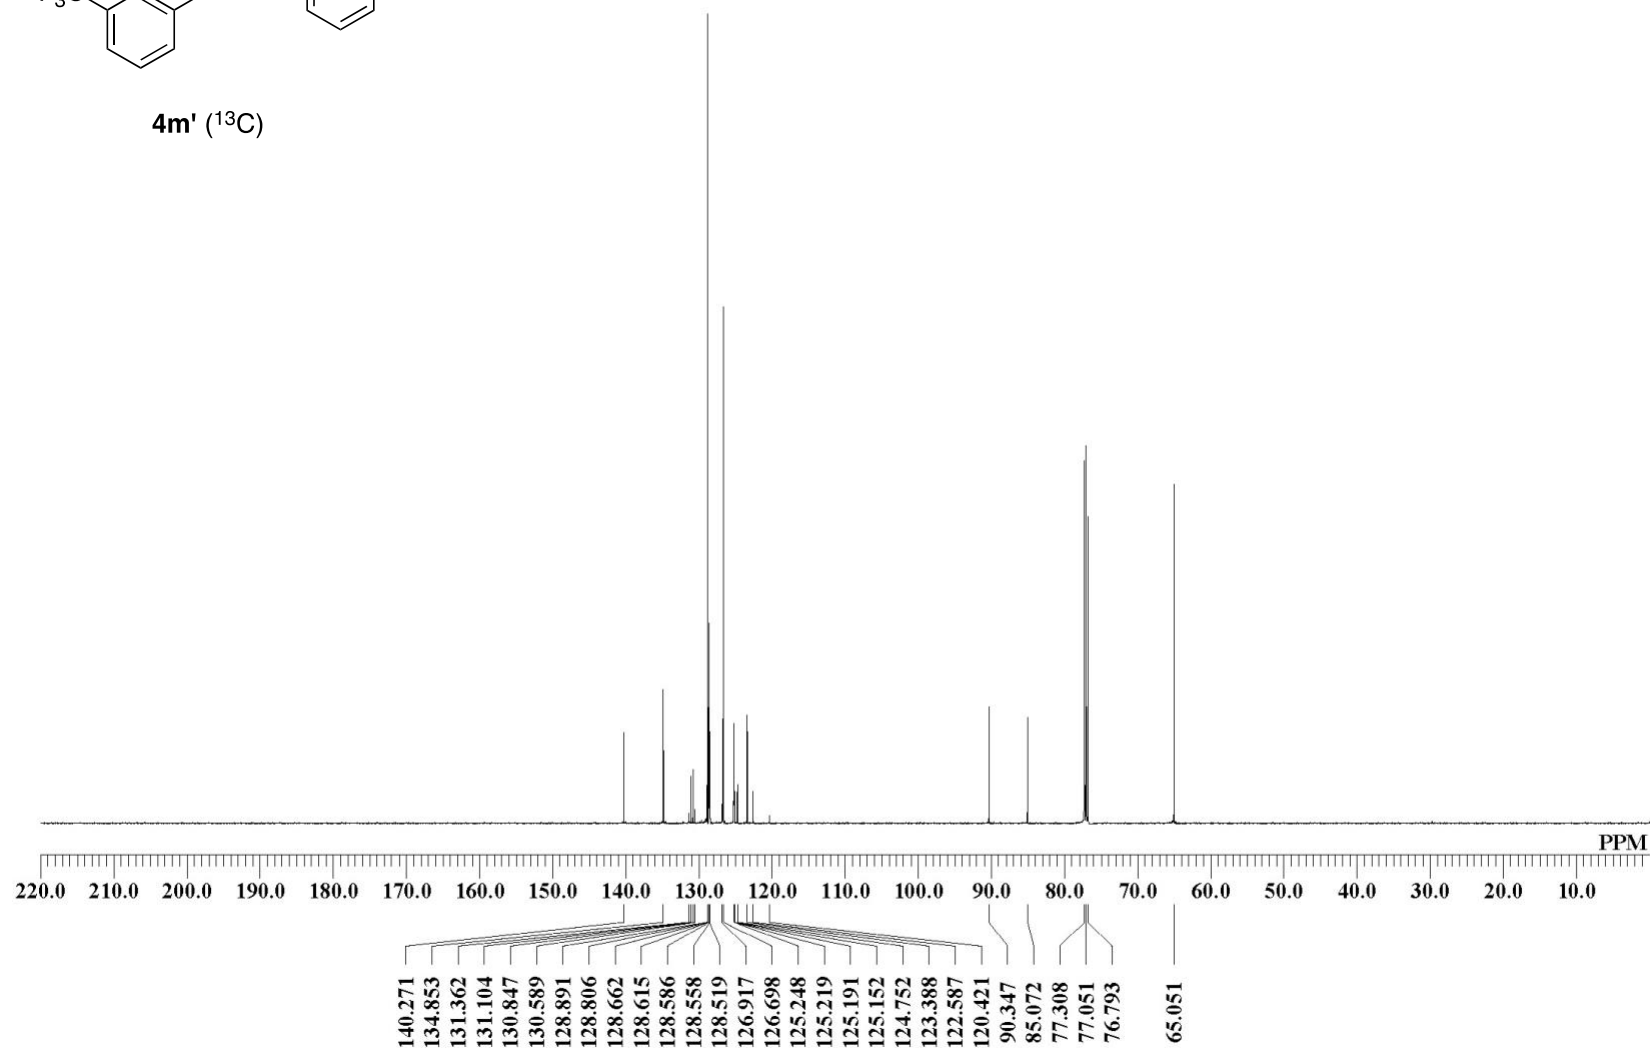

6KO-220 Fr  $^{19}\text{F}$

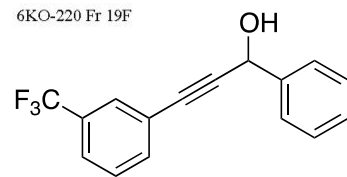

**4m'** ( $^{19}\text{F}$ )

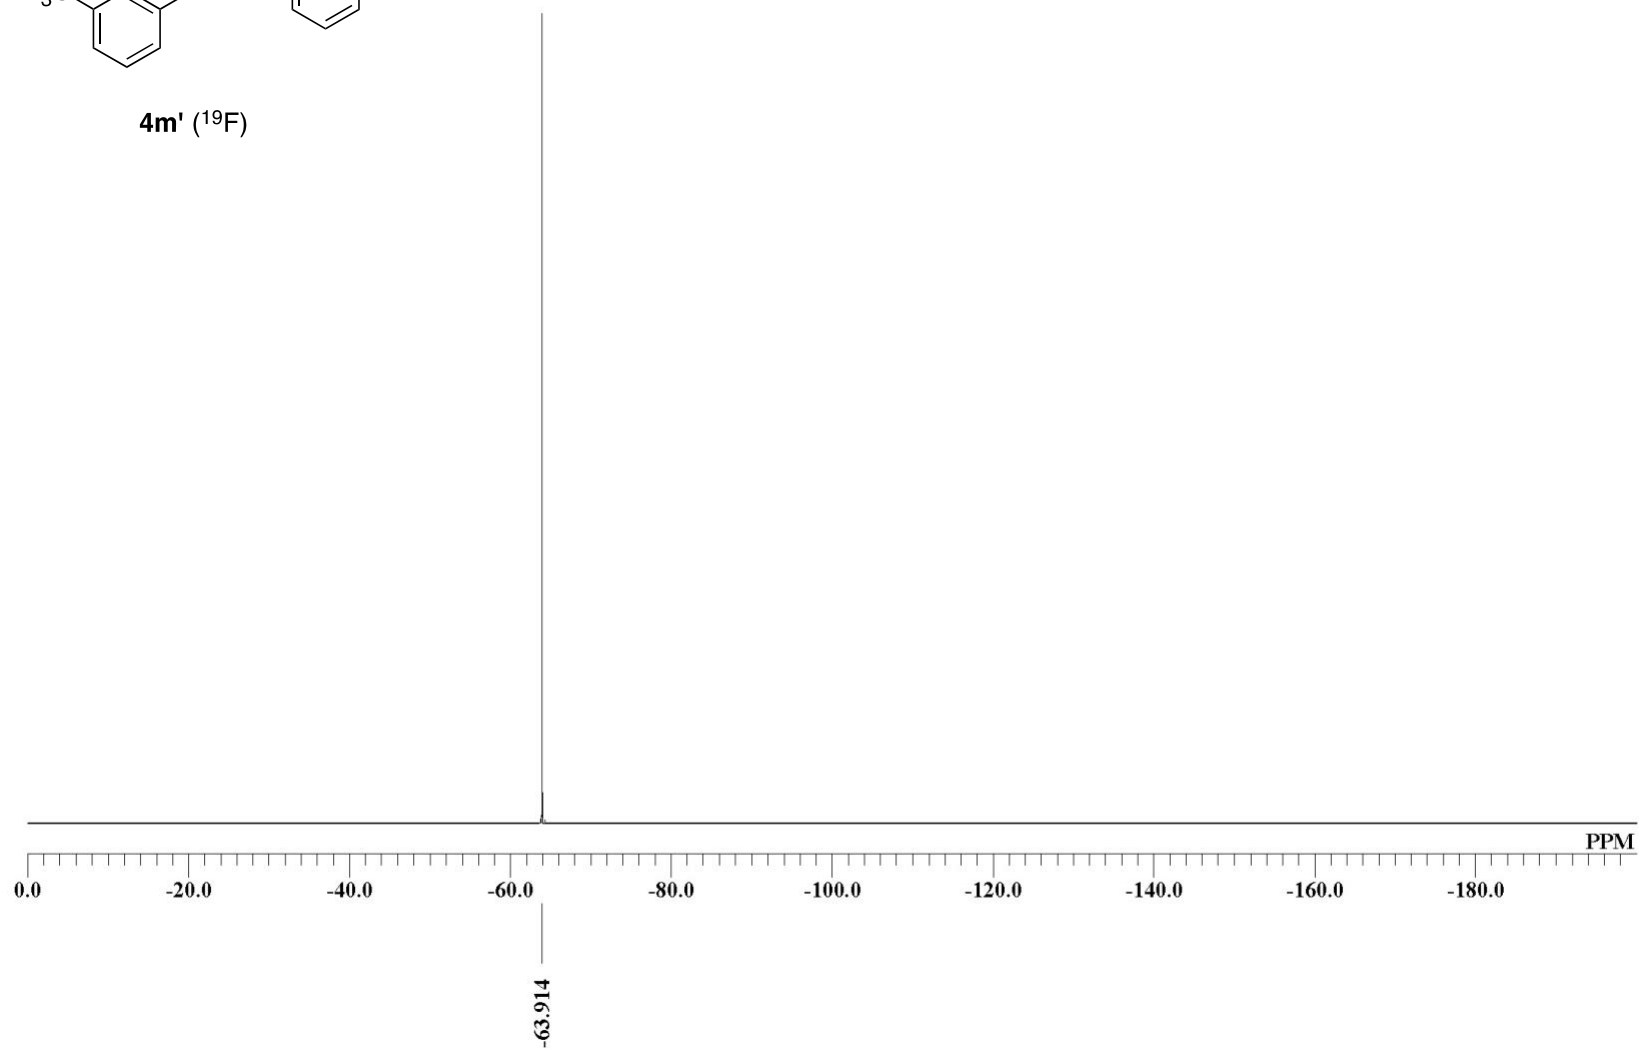

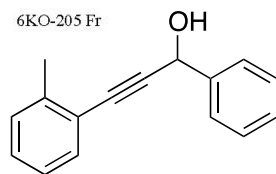

4n' (<sup>1</sup>H)

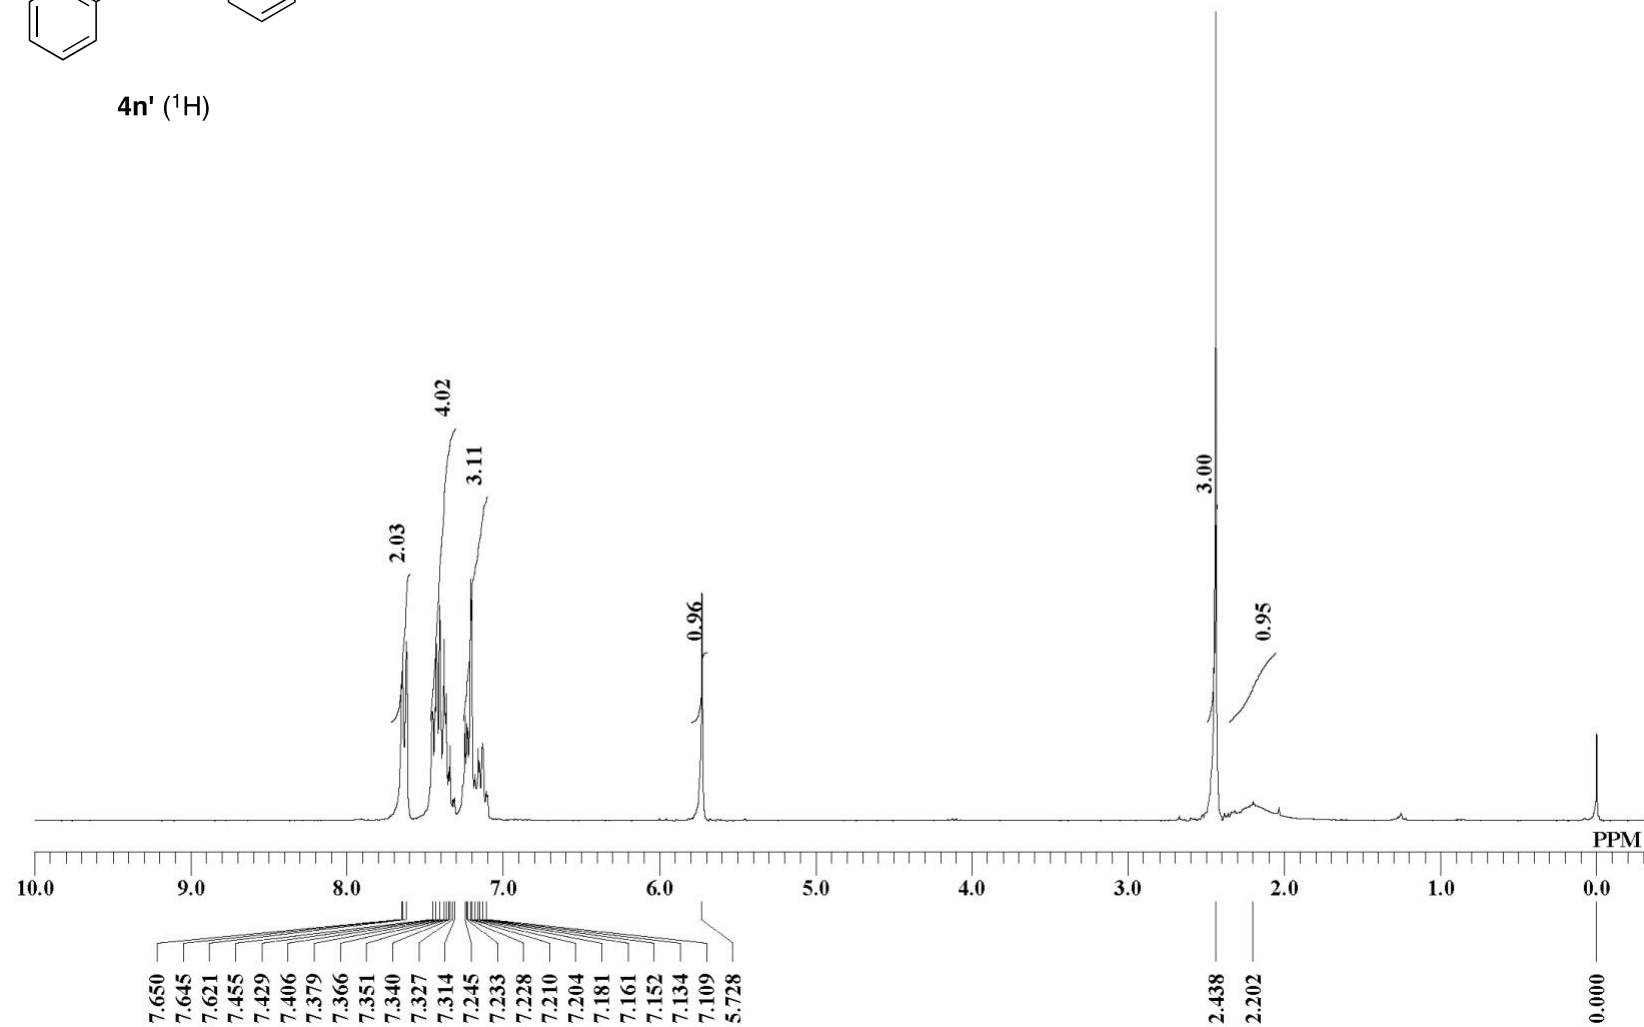

6KO-205 Fr 13C

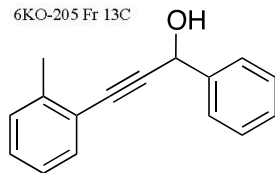

**4n'** (<sup>13</sup>C)

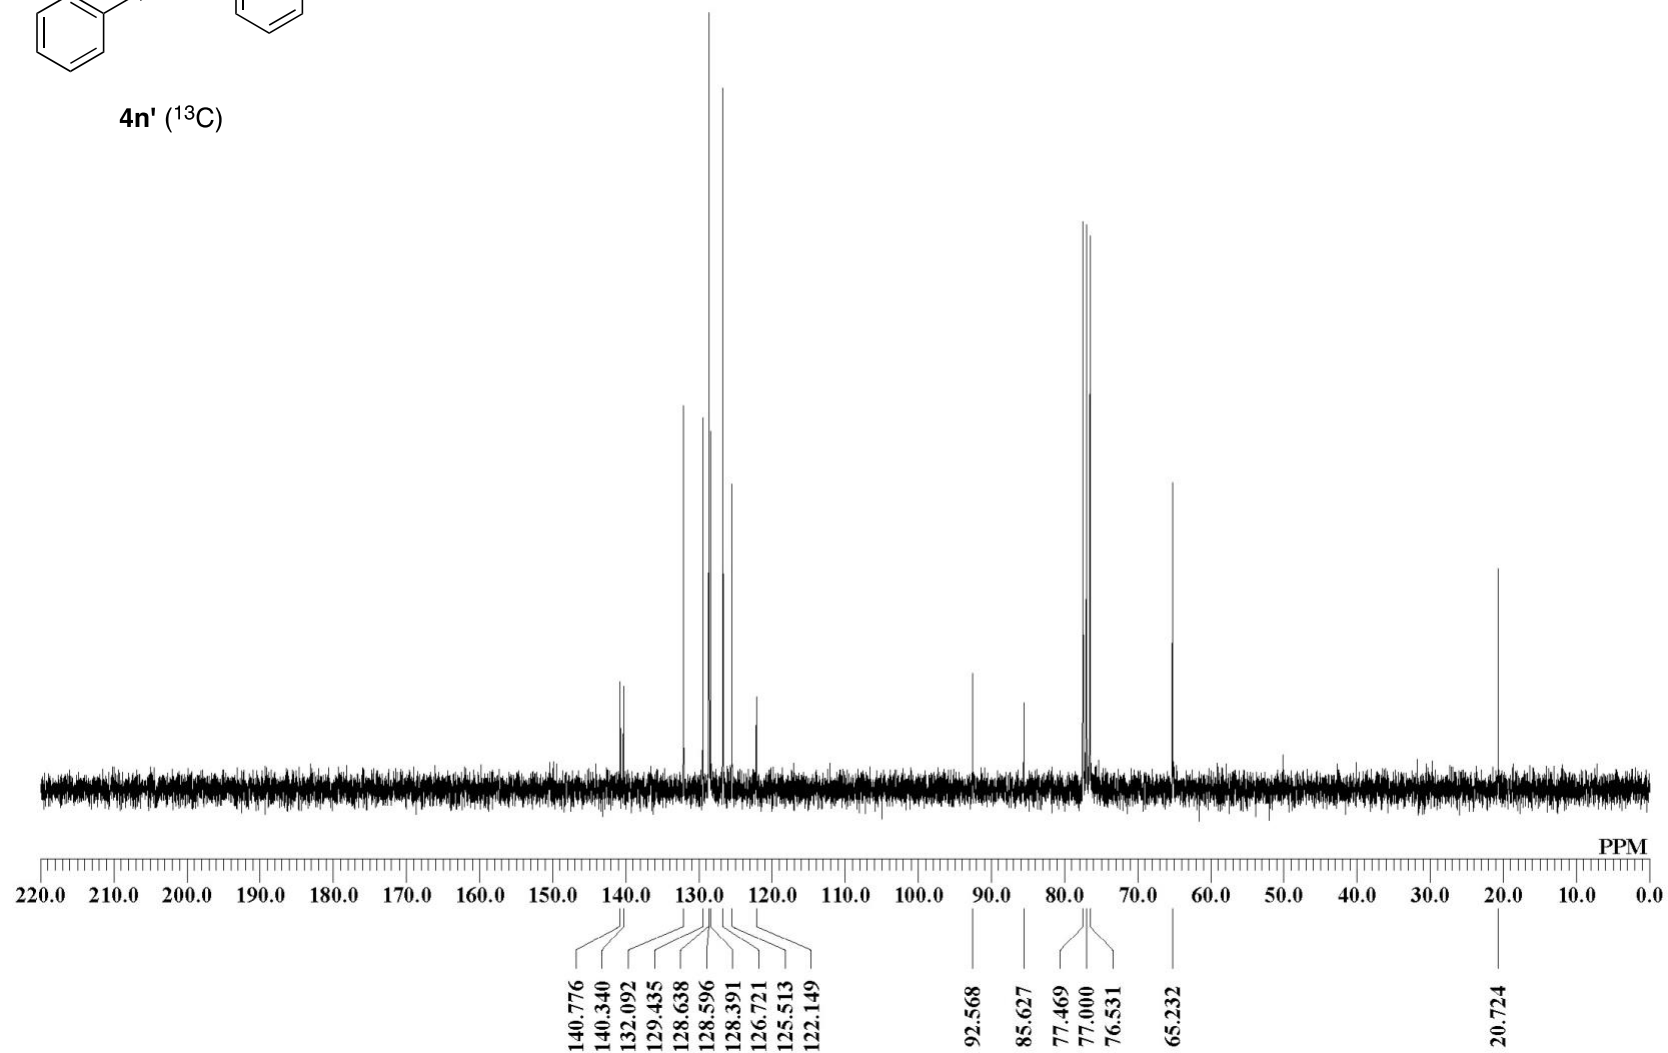

7YT-19-fr

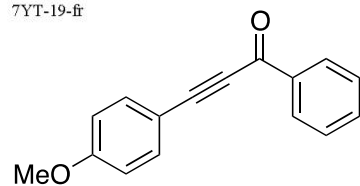

**4d** ( $^1\text{H}$ )

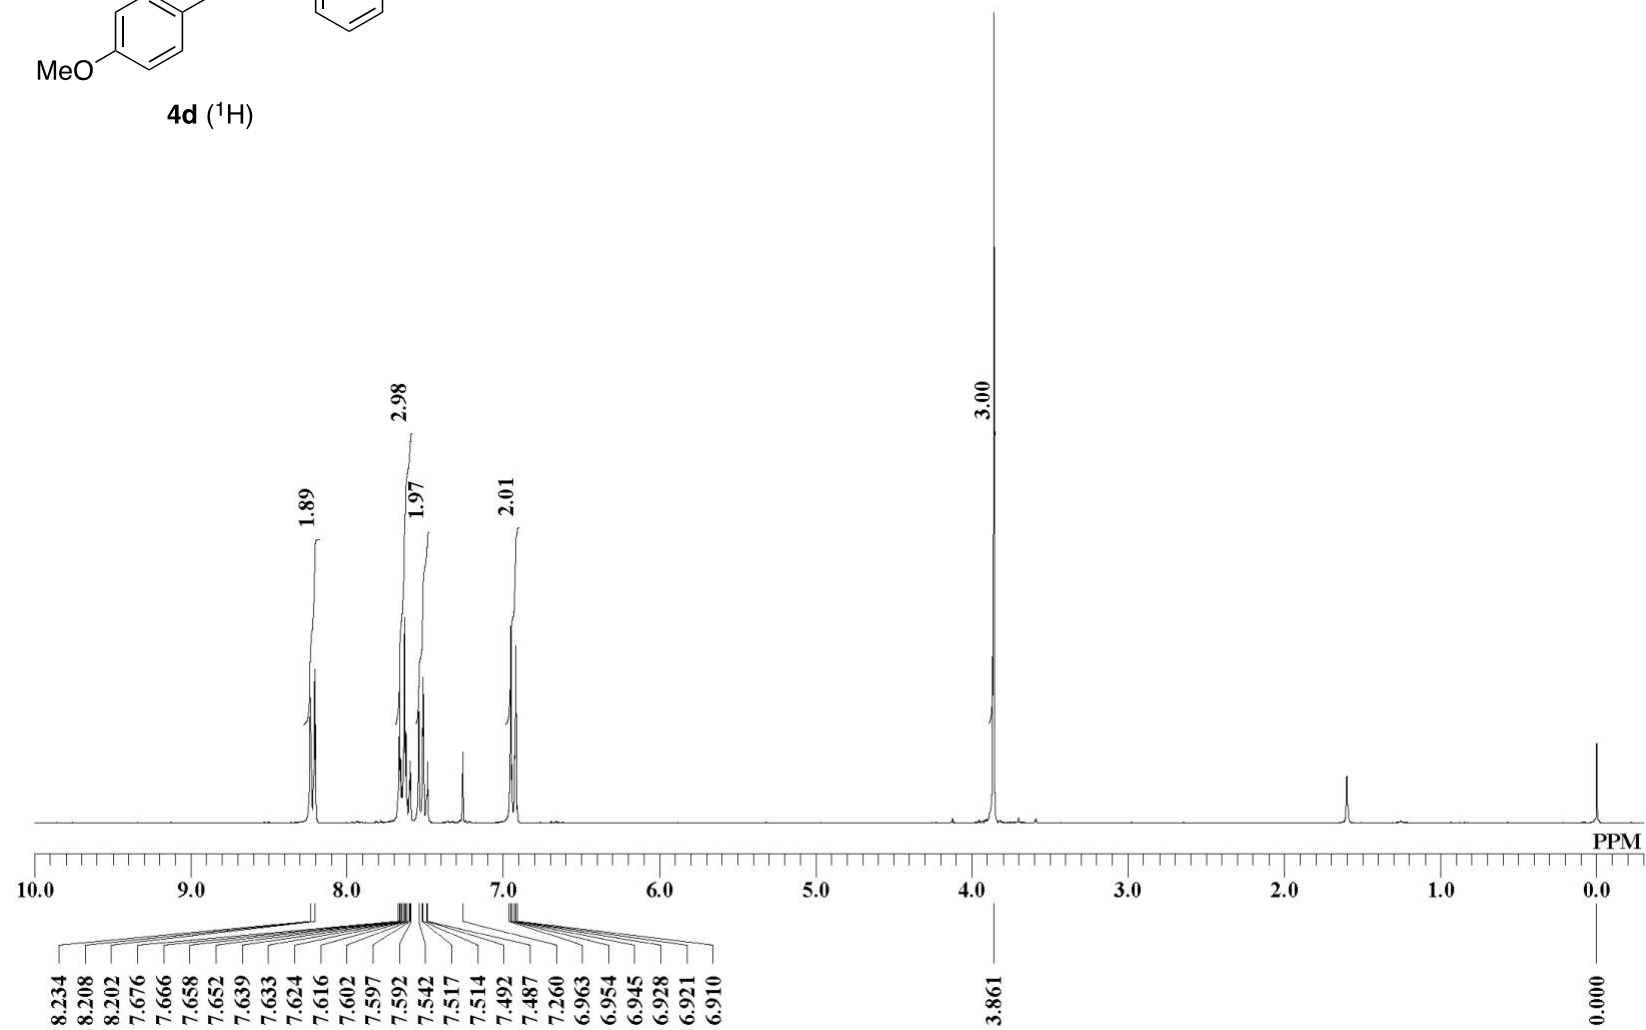

6KO-206 Fr

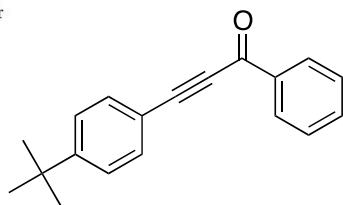

**4c** (<sup>1</sup>H)

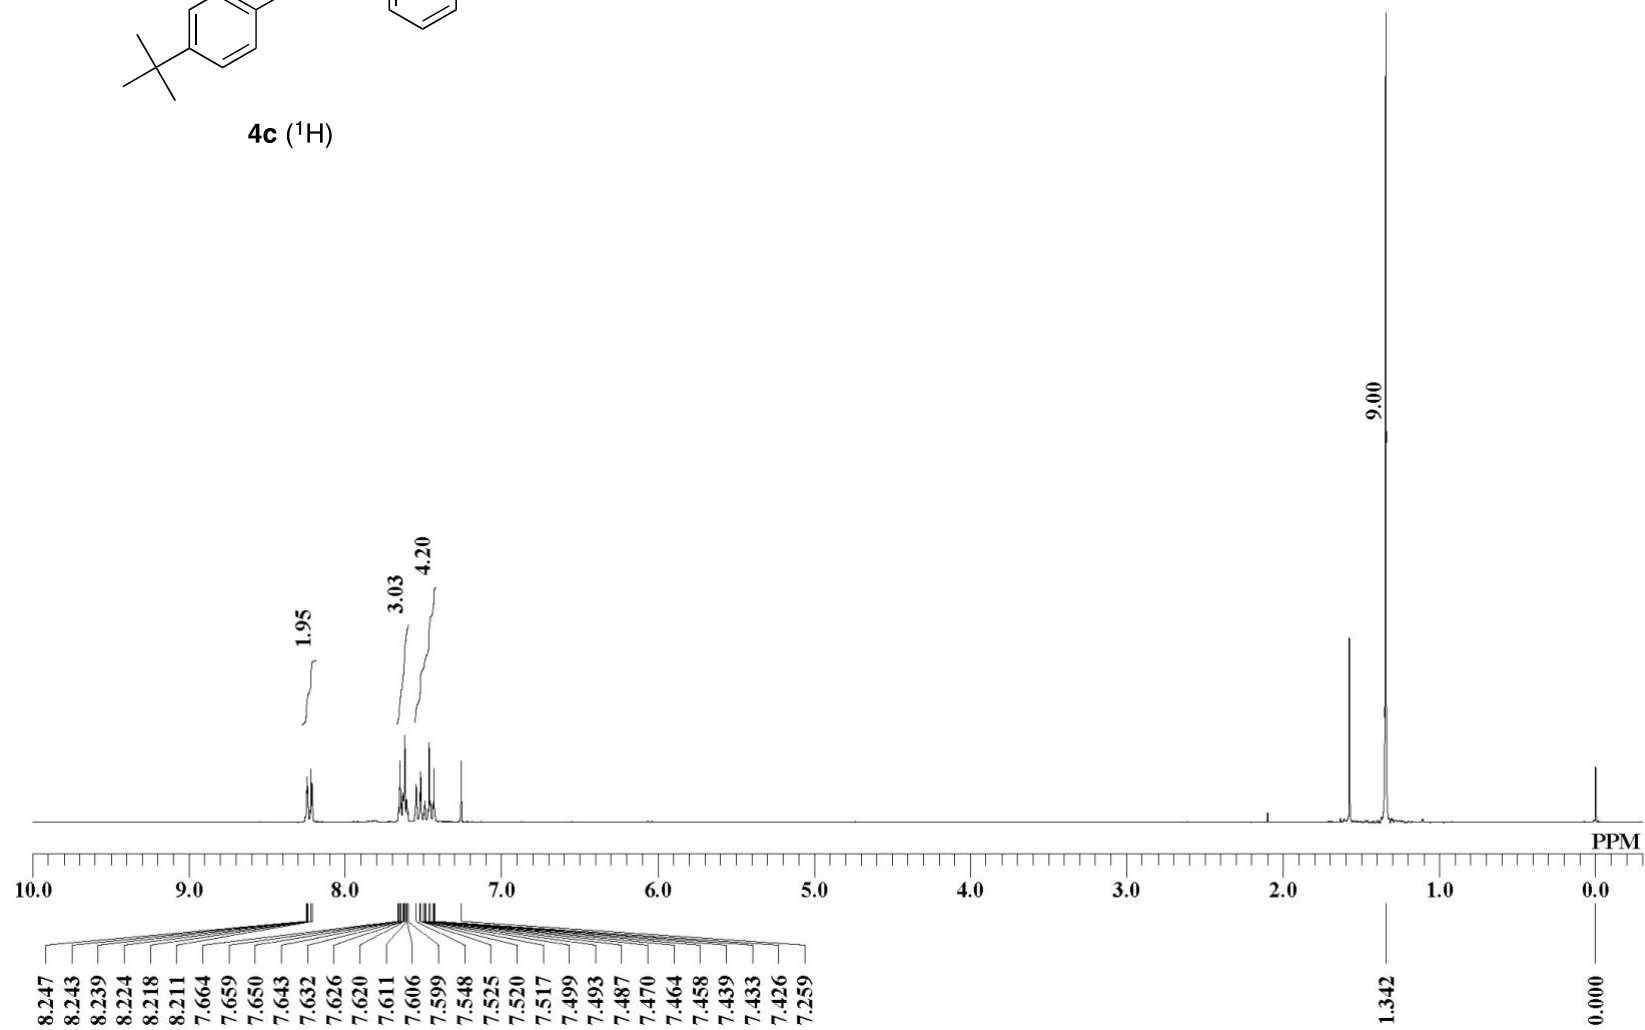

7YT-20 Fr 500MHz

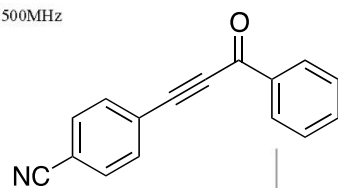

**4f** ( $^1\text{H}$ )

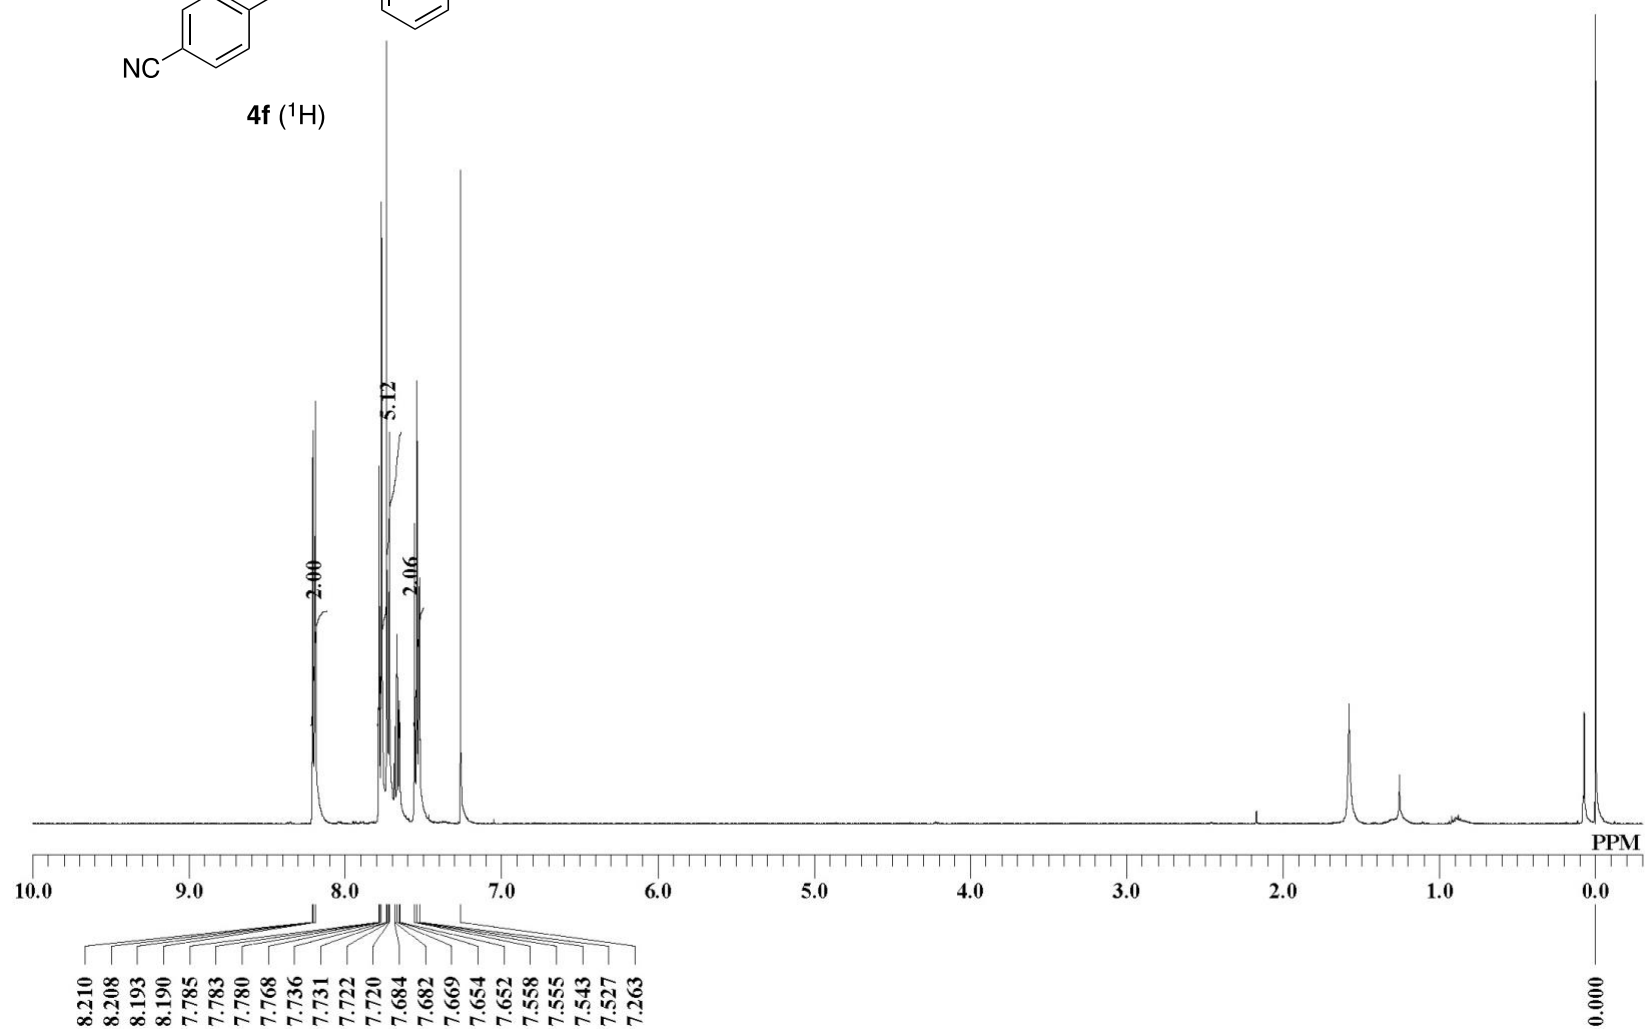

6KO-233 Fr3

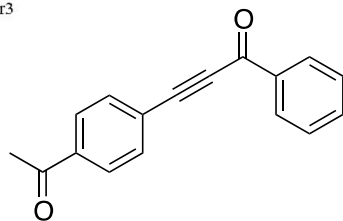

4i (<sup>1</sup>H)

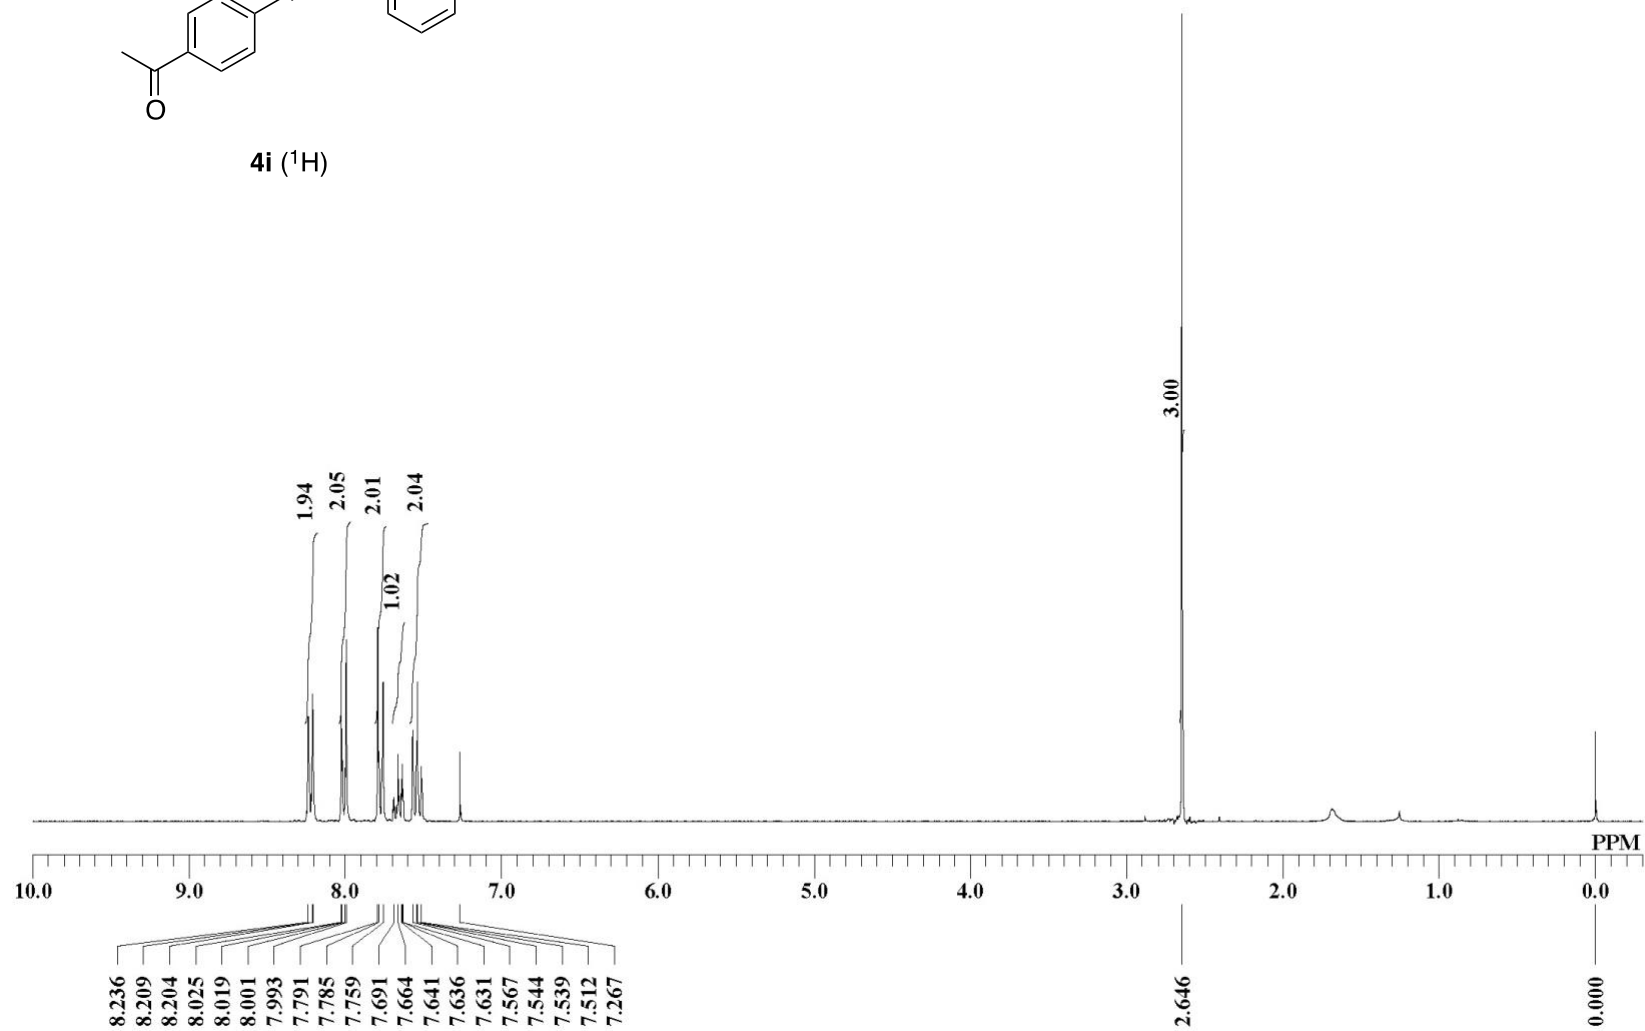

7YT-18

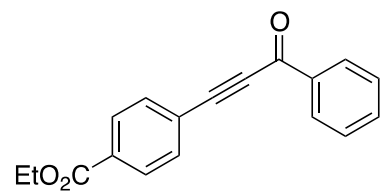

4j ( $^1\text{H}$ )

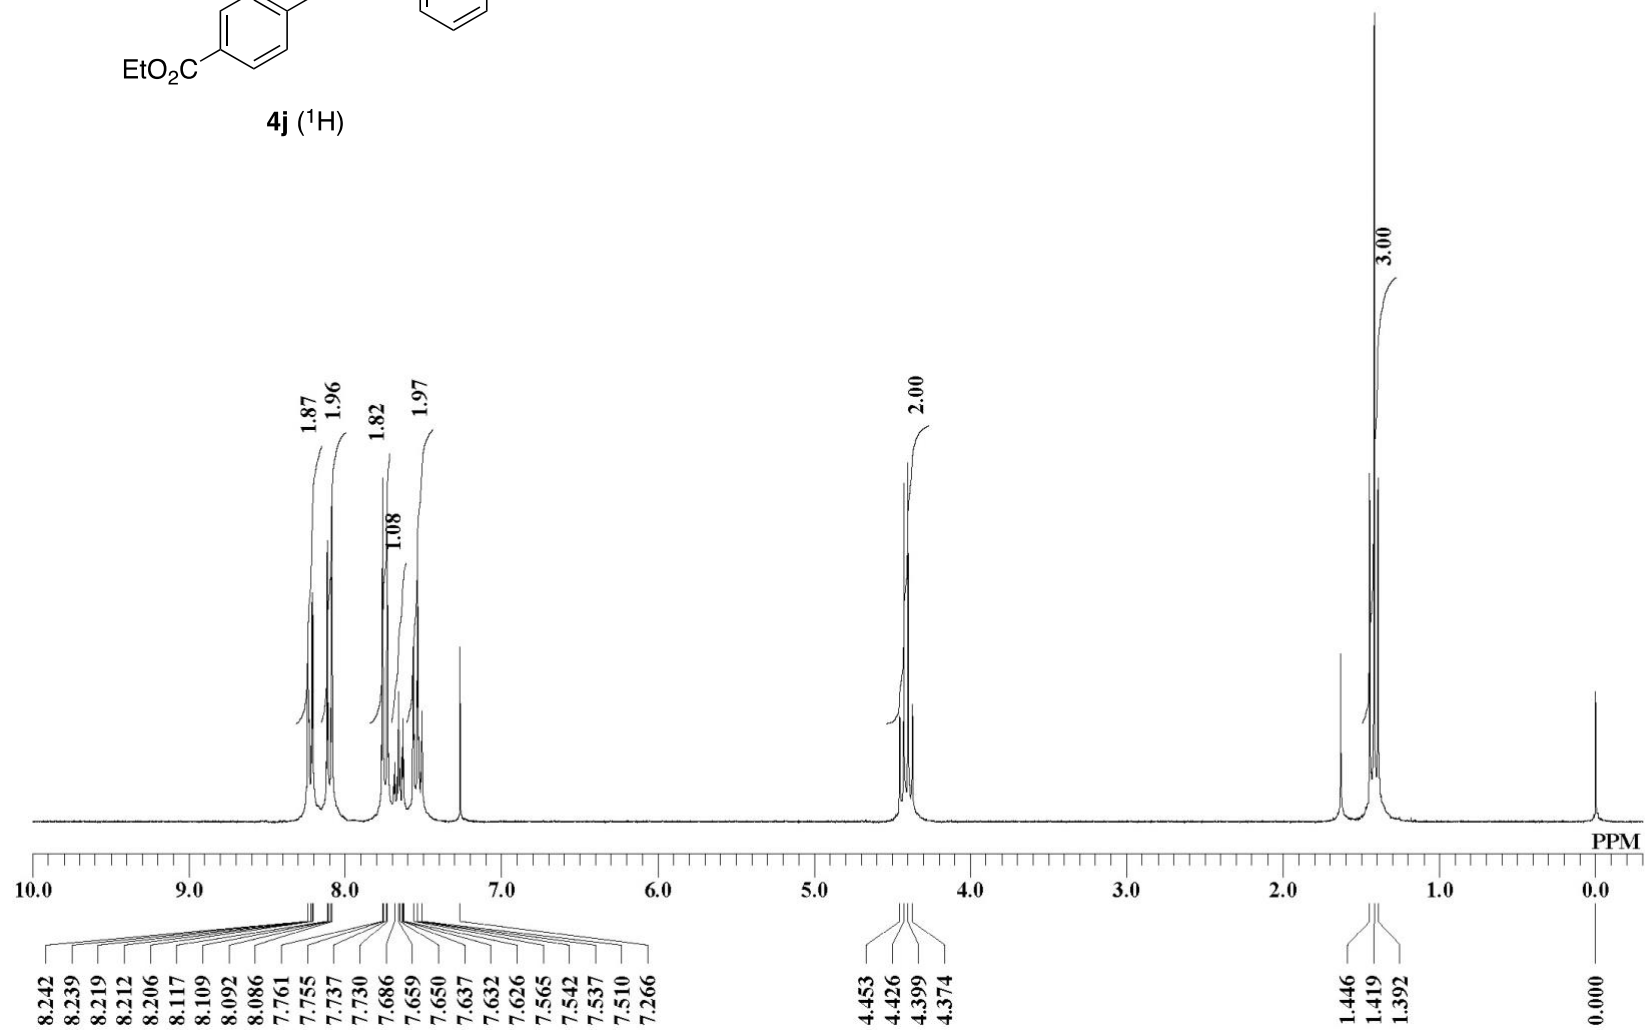

6KO-227 Fr

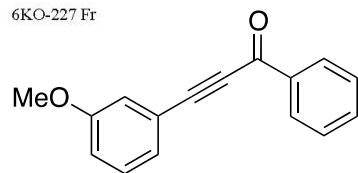

**4l** (<sup>1</sup>H)

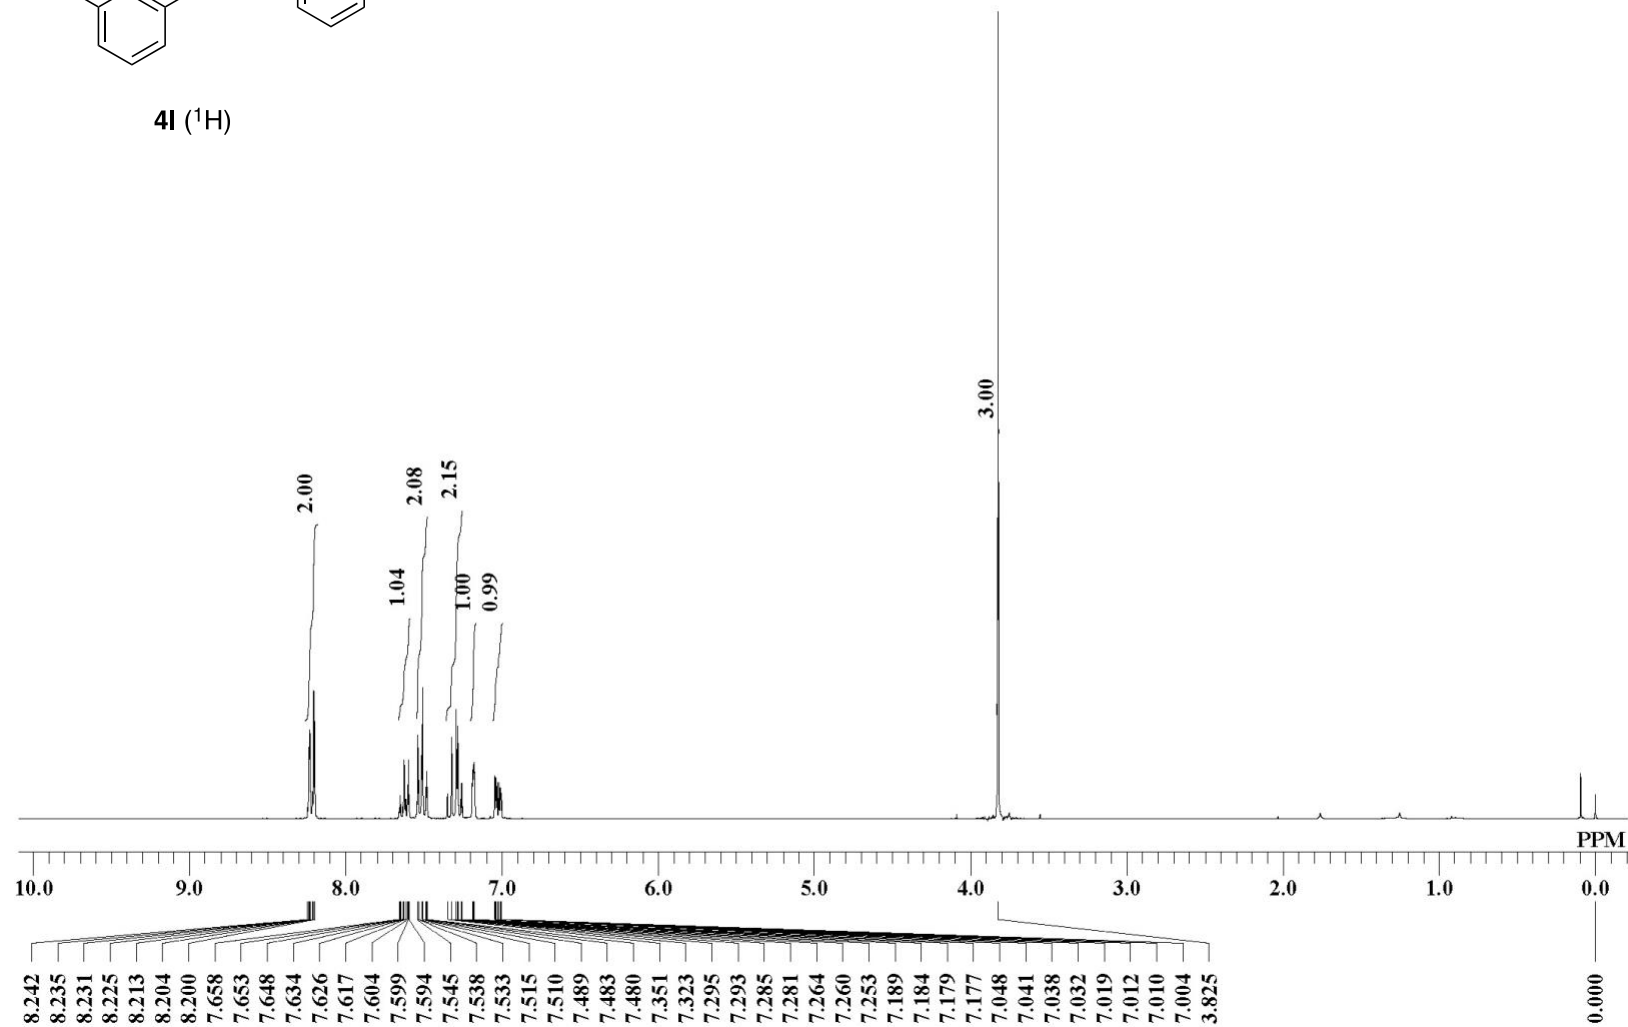

6KO-227 Fr  $^{13}\text{C}$

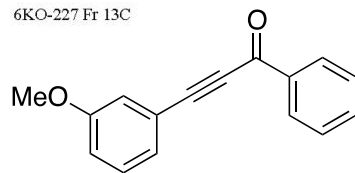

**41** ( $^{13}\text{C}$ )

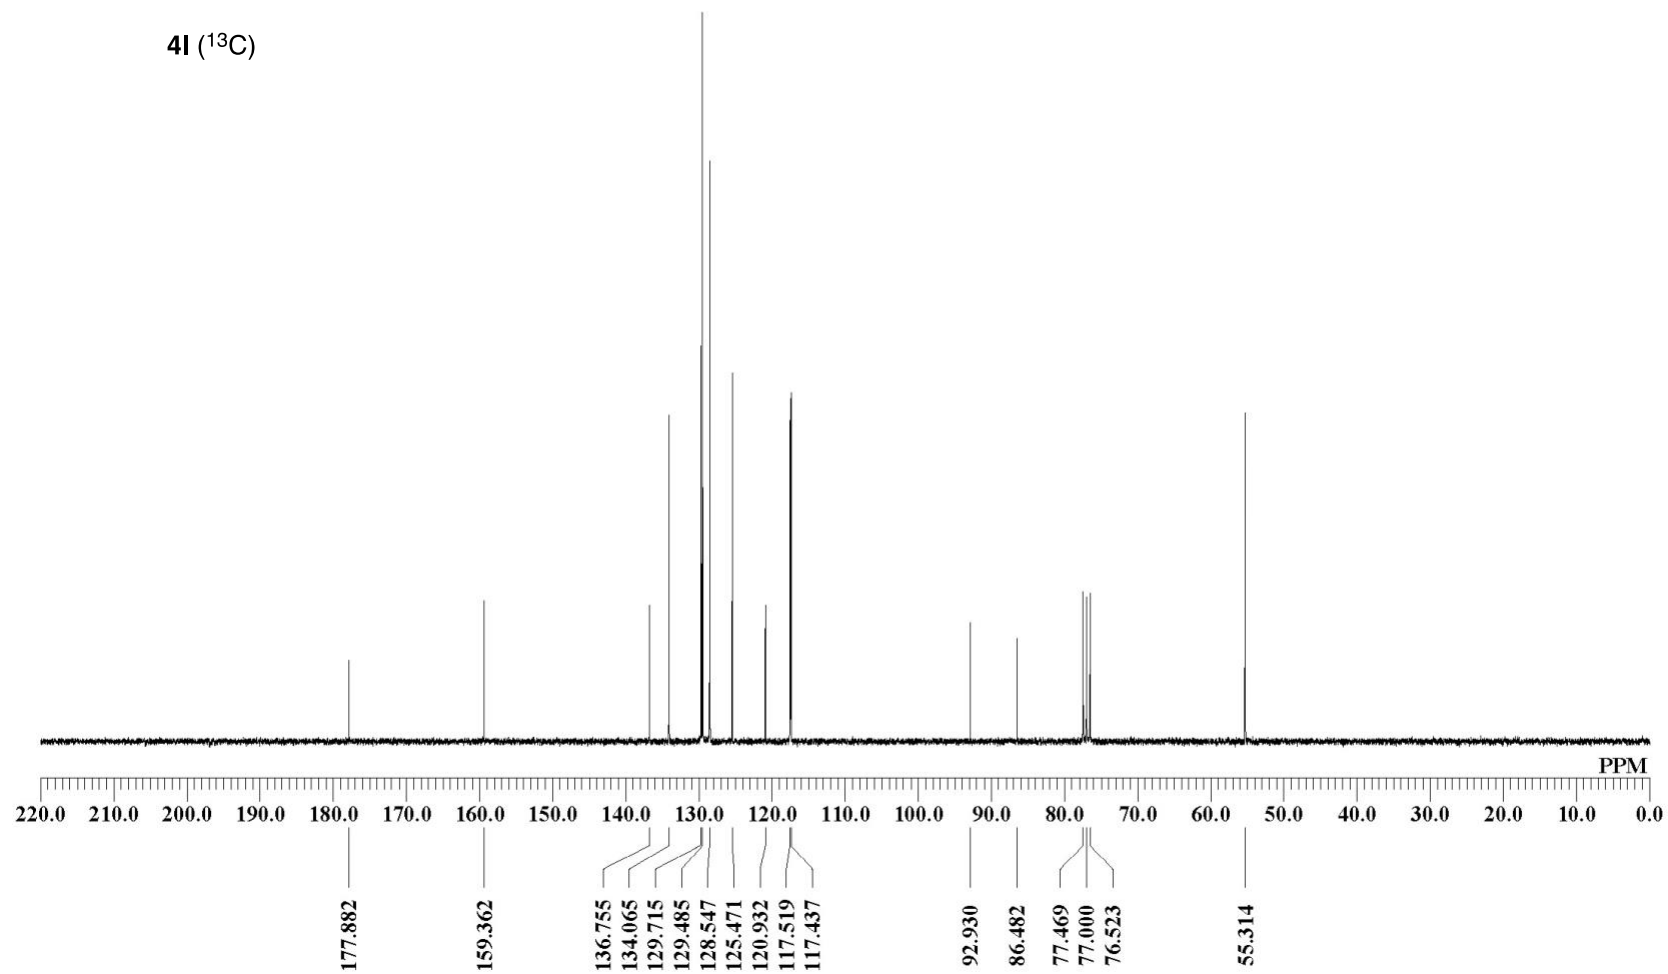

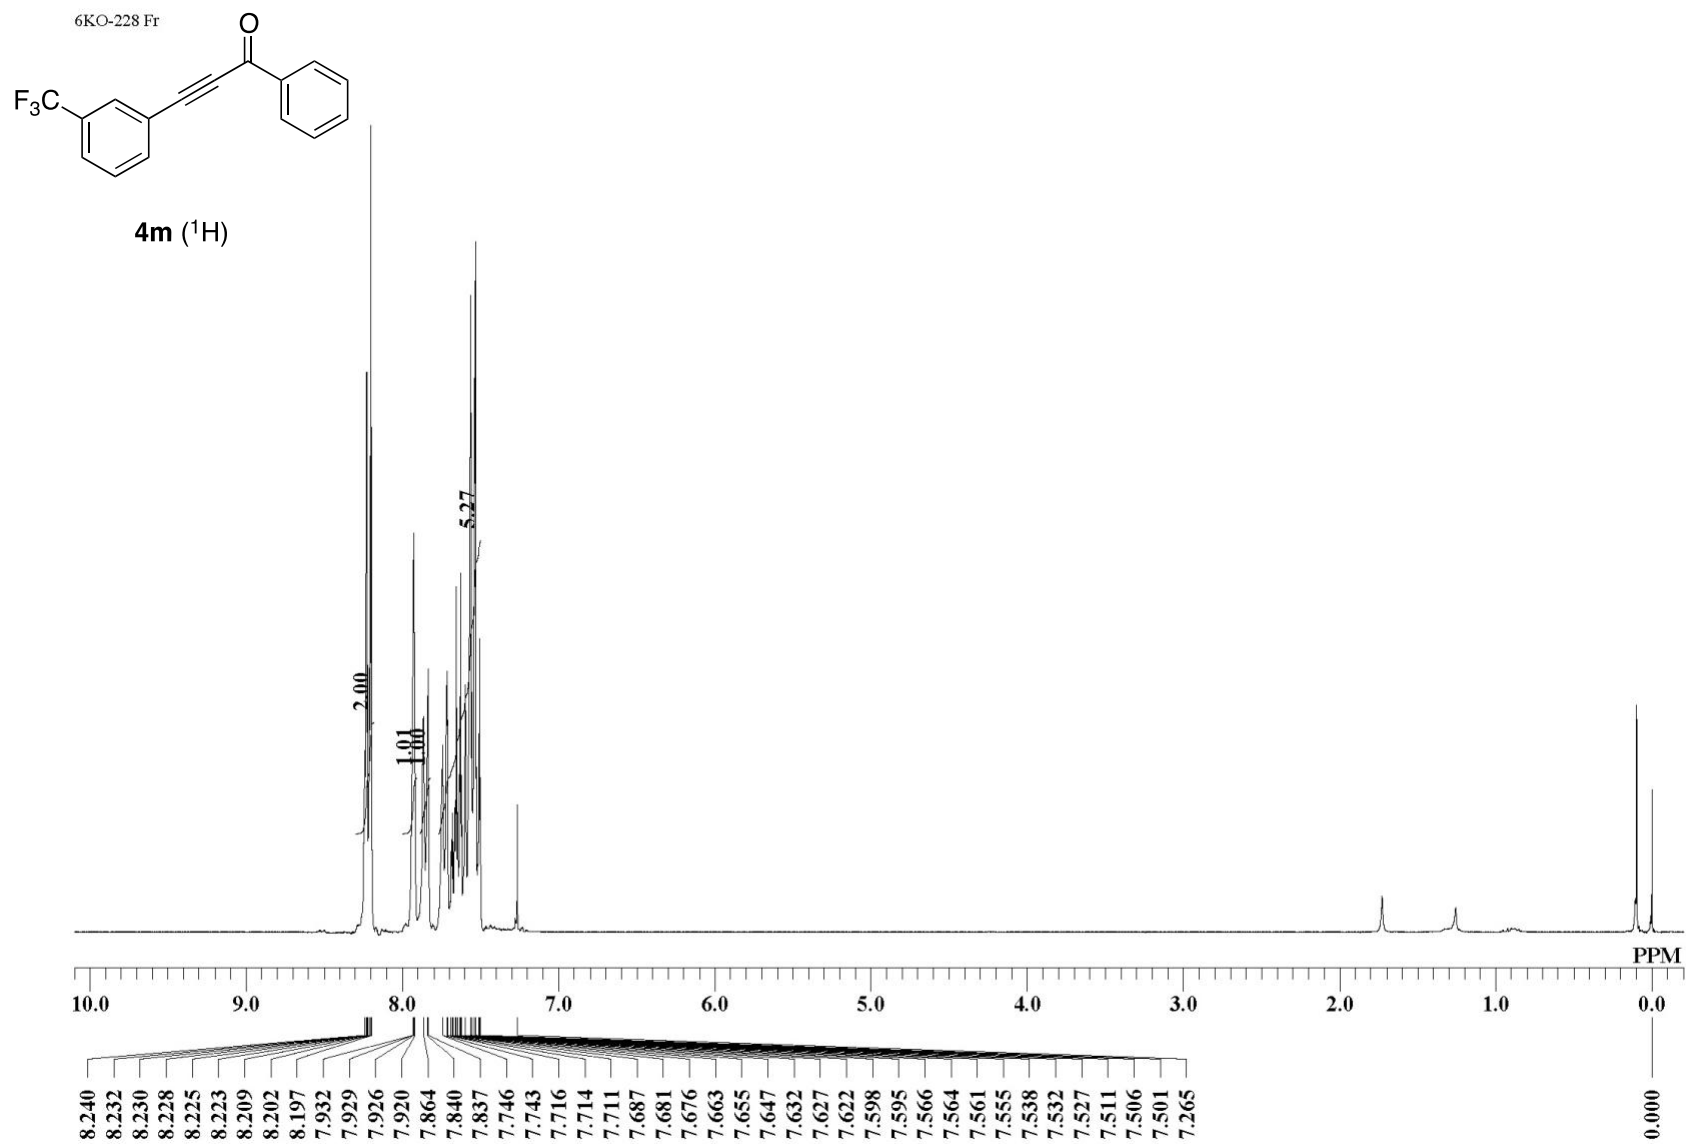

6KO-228 Fr  $^{13}\text{C}$  500MHz

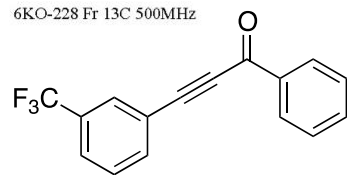

**4m** ( $^{13}\text{C}$ )

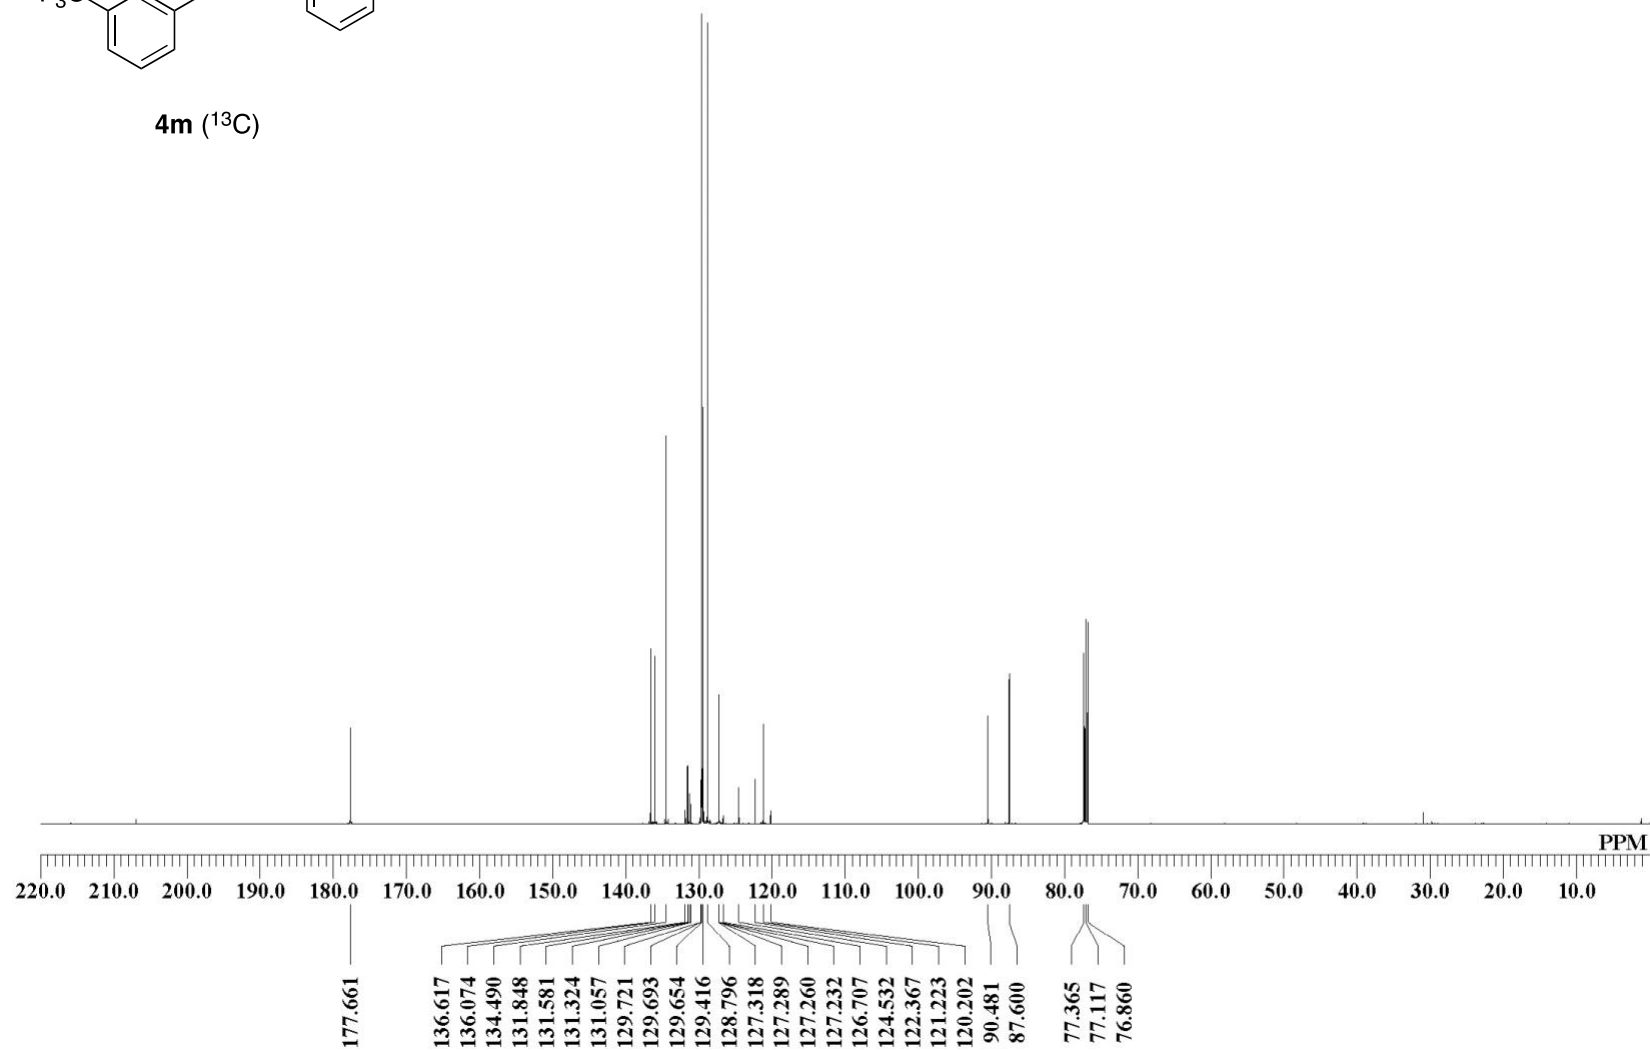

6KO-228 Fr  $^{19}\text{F}$

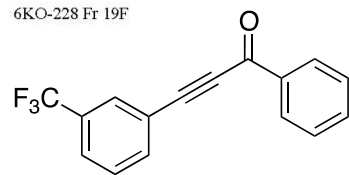

**4m** ( $^{19}\text{F}$ )

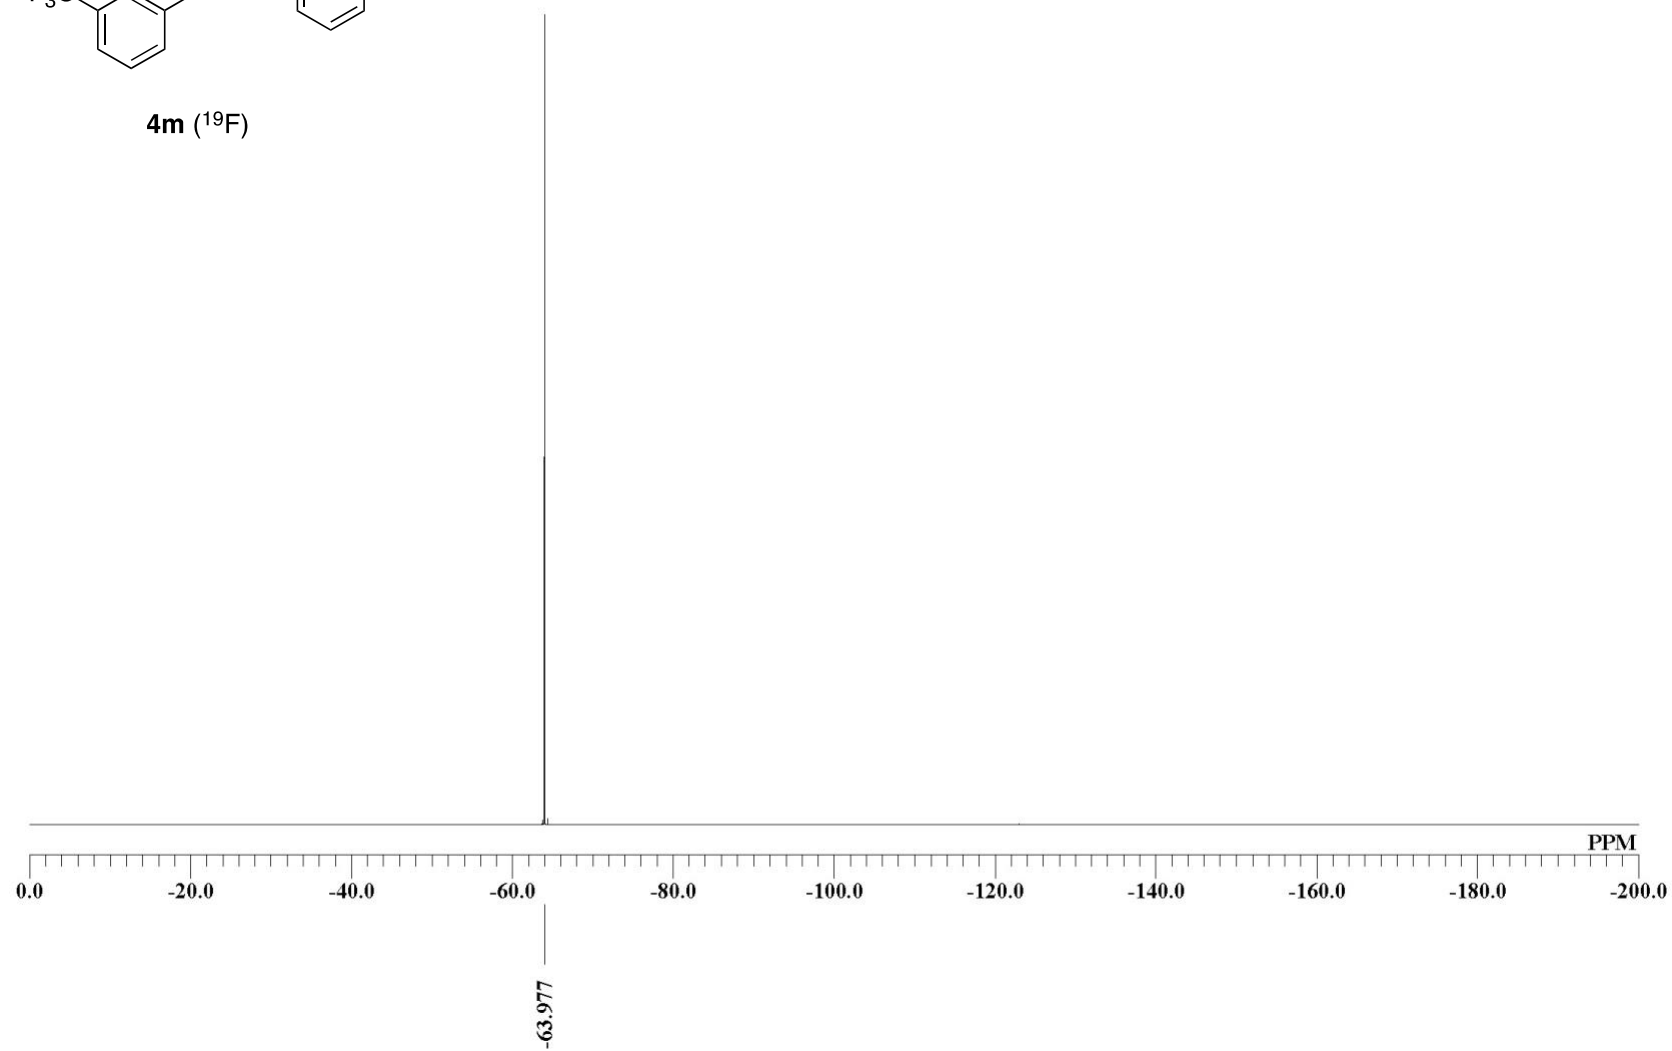

6KO-226 Fr

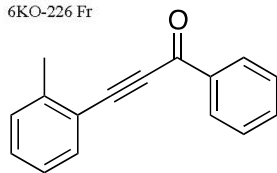

**4n** ( $^1\text{H}$ )

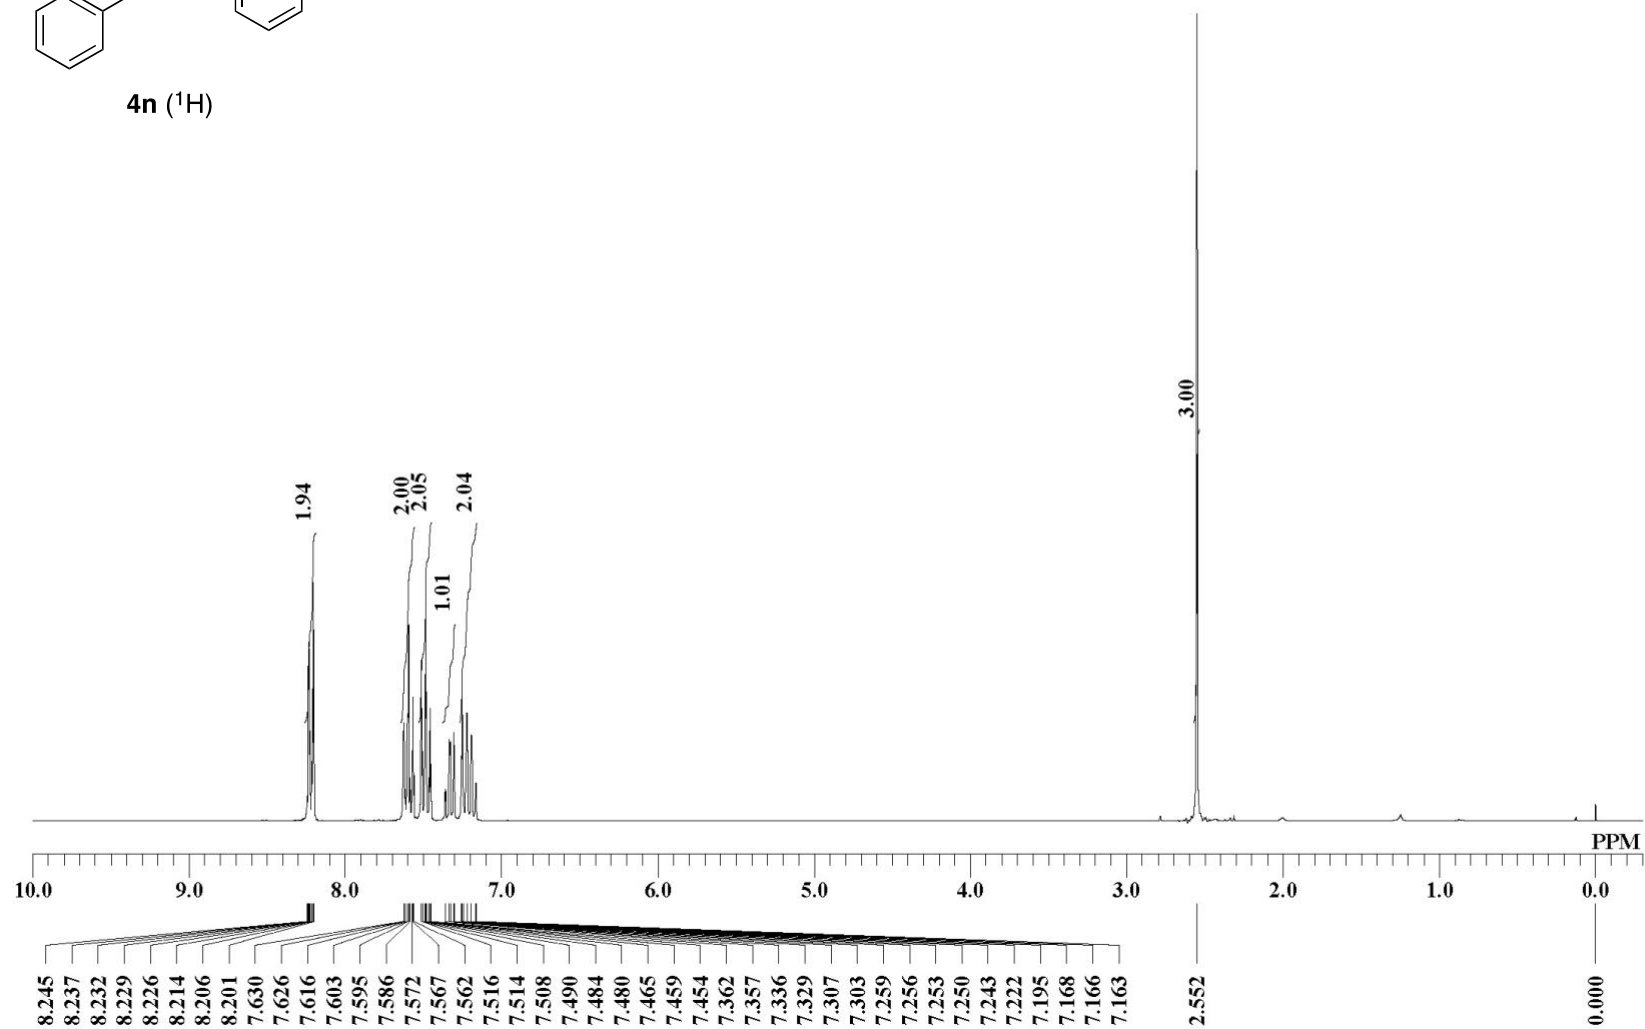

7YT-21-ft

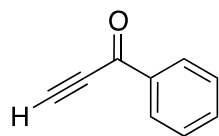

**4s** ( $^1\text{H}$ )

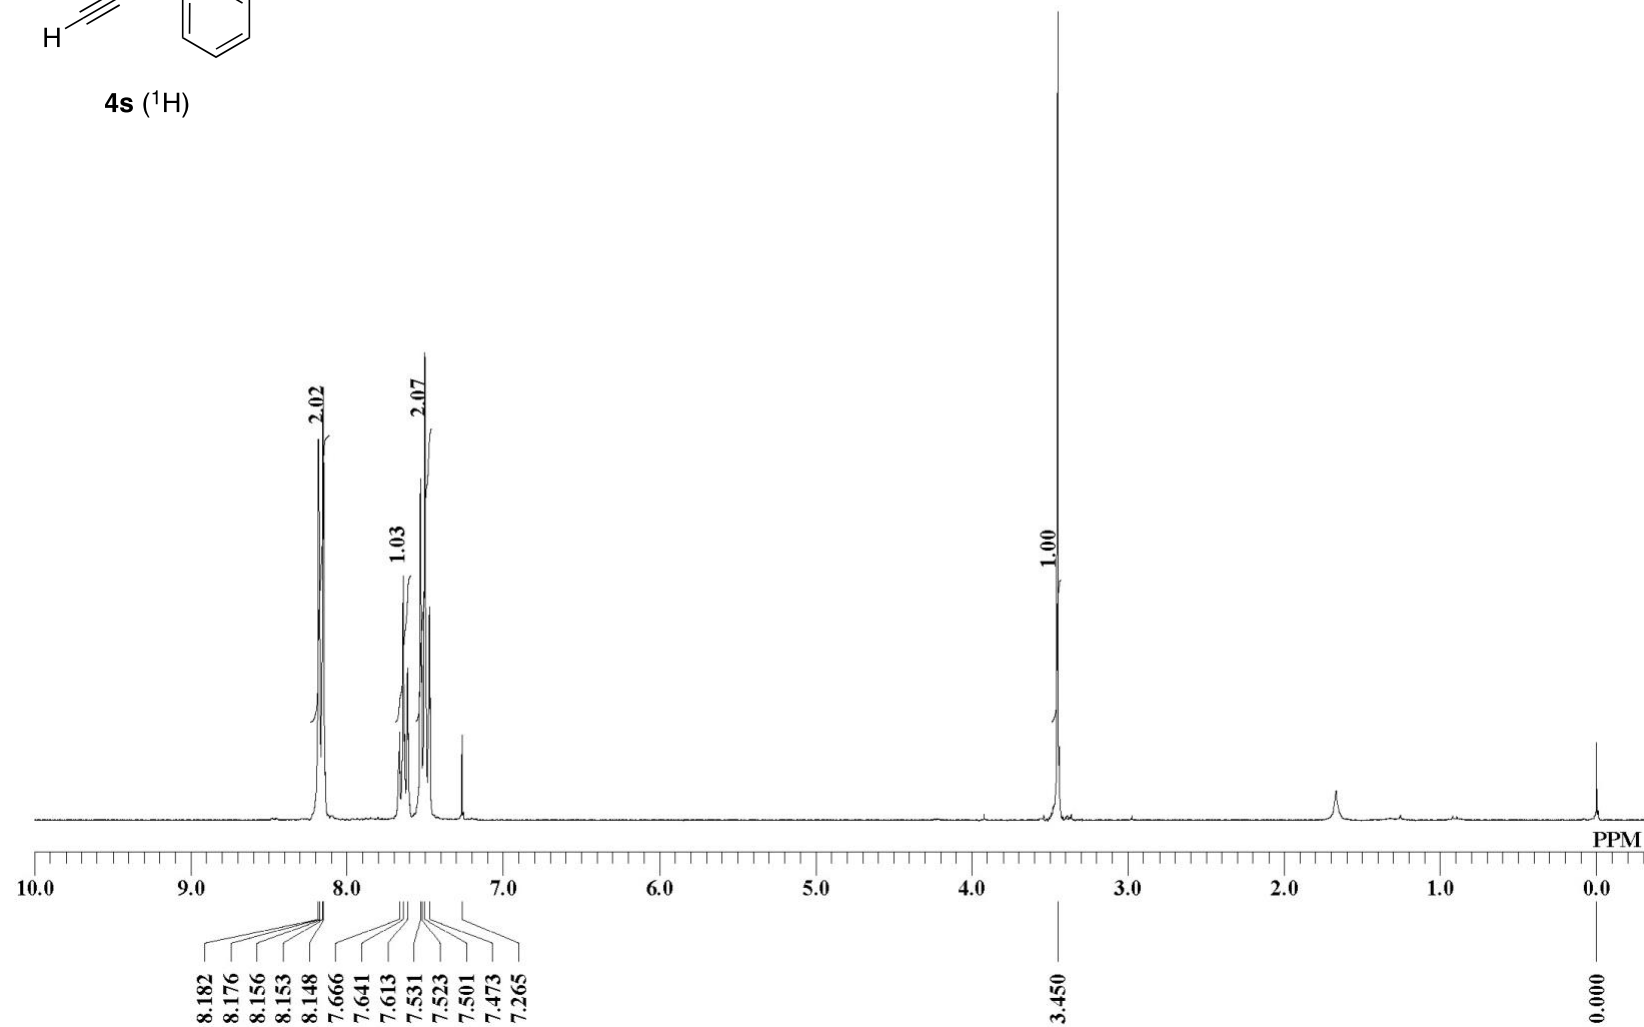

7YT-21 fr 13C

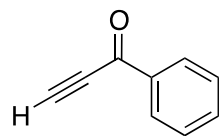

**4s** (<sup>13</sup>C)

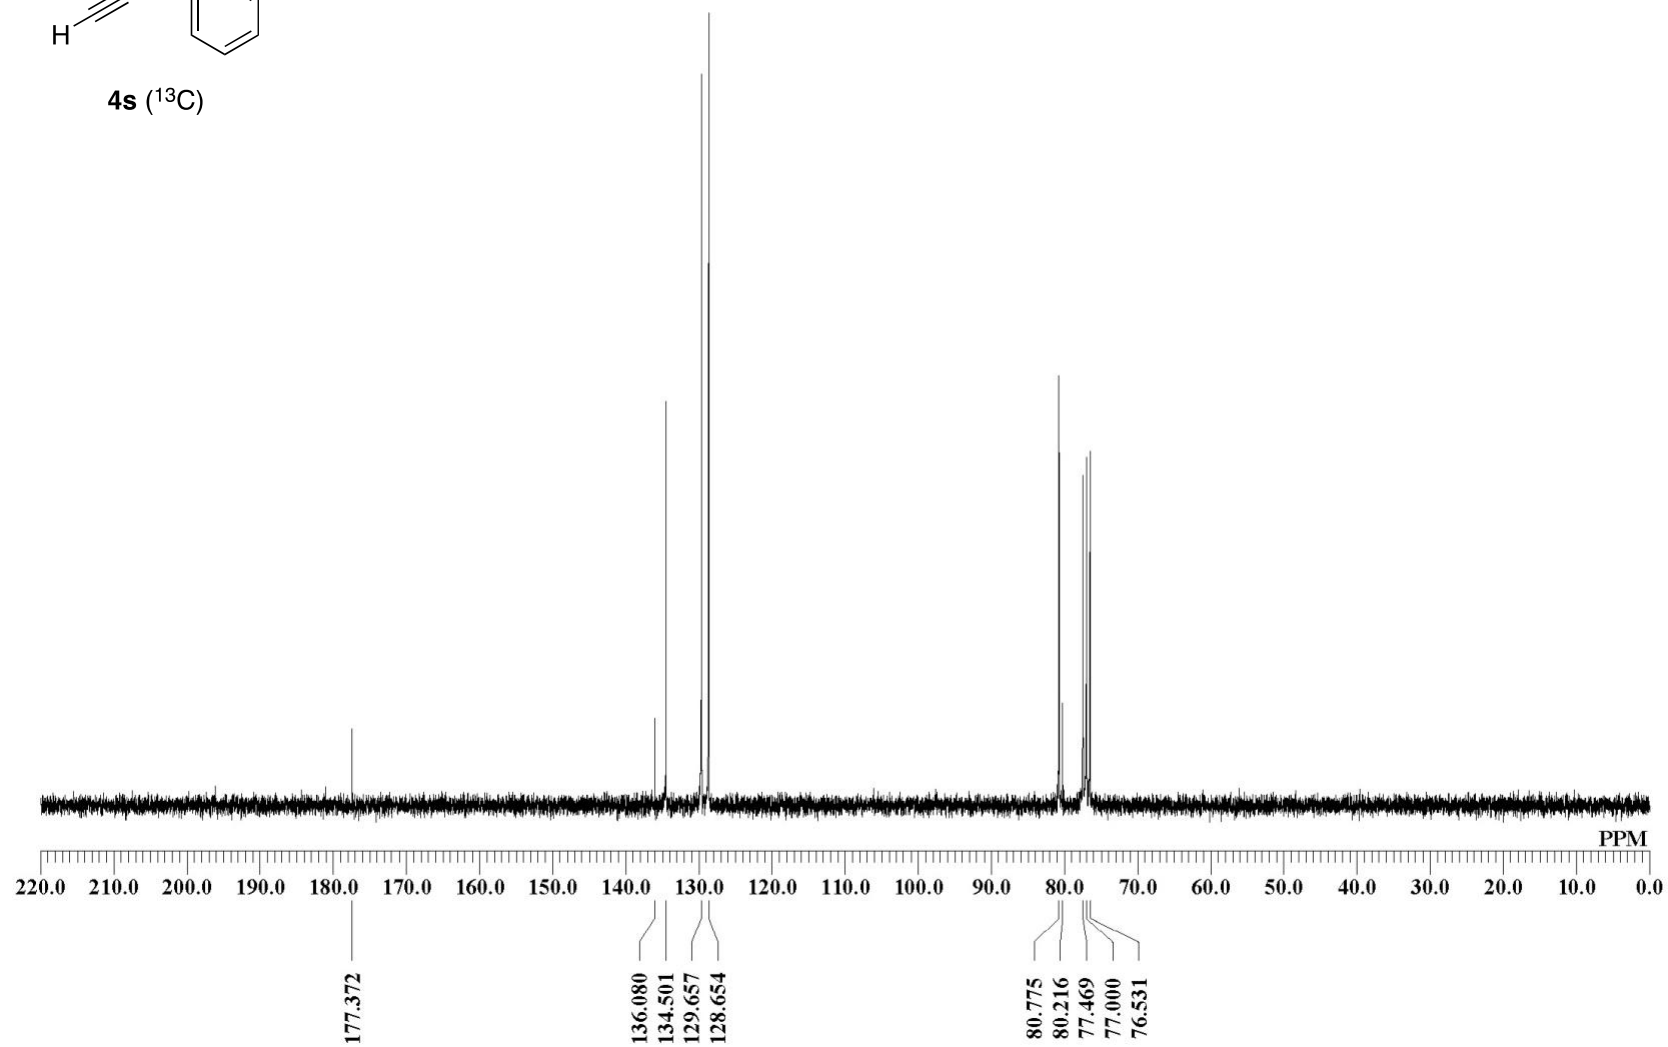

4-Phenyl-3-butyne-2-ol

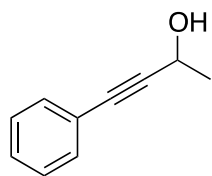

**3'** ( $^1\text{H}$ )

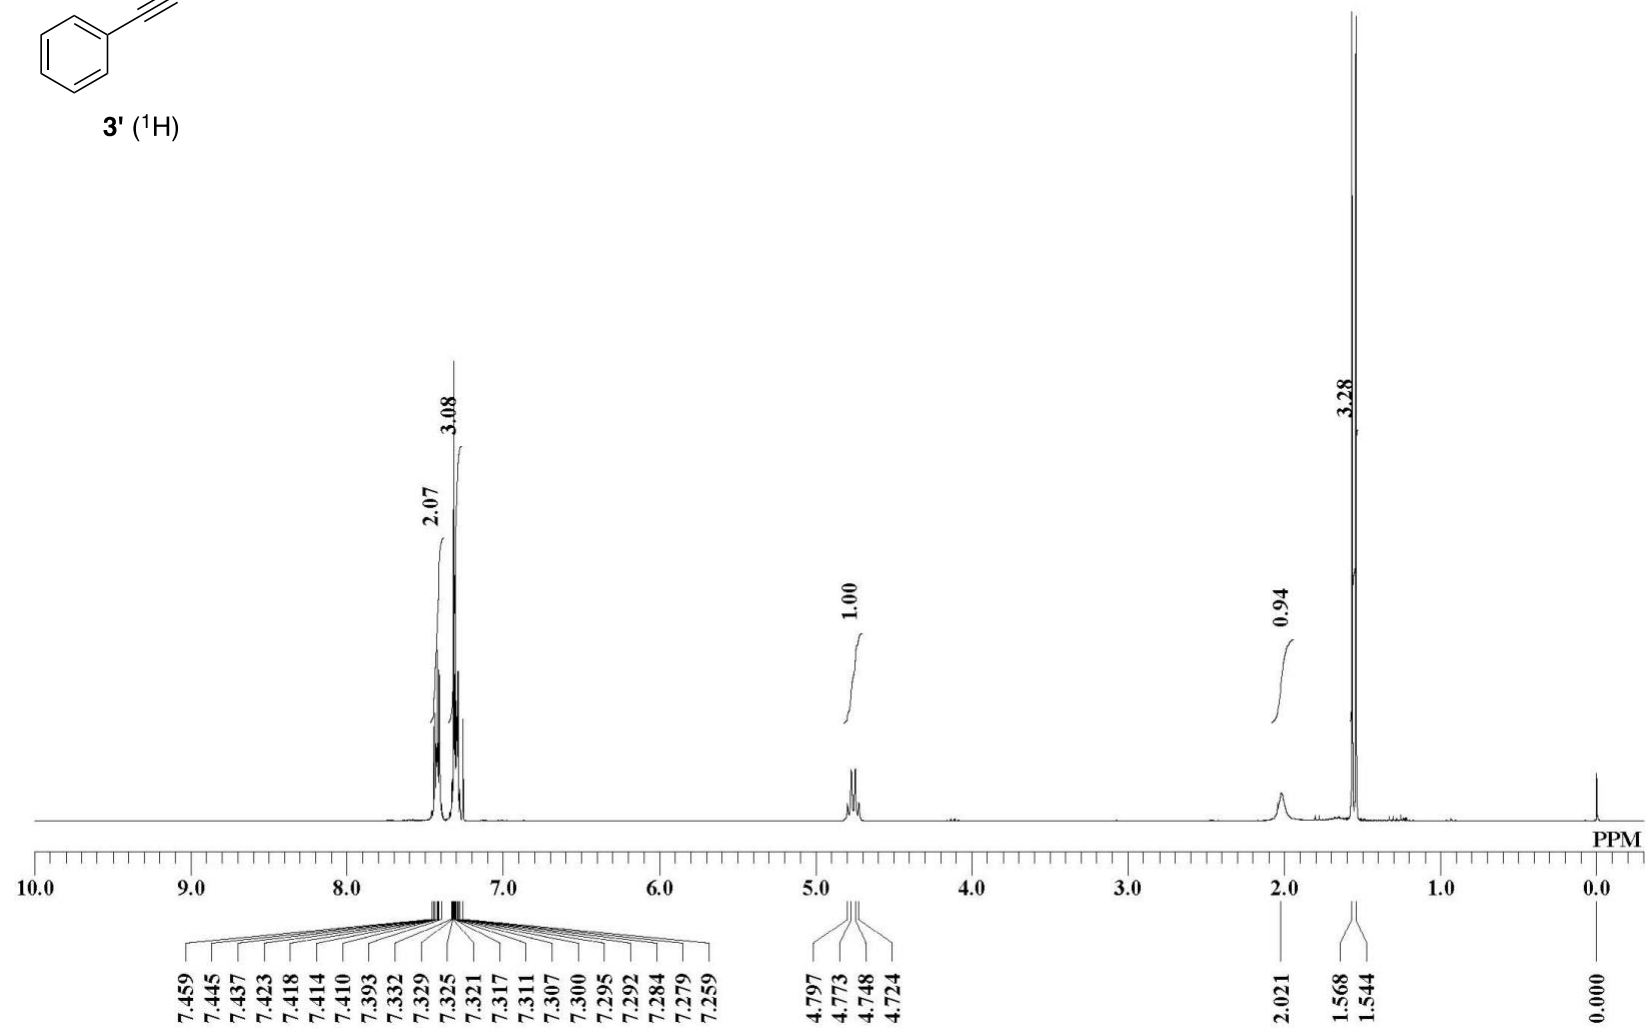

6KO-104-ft

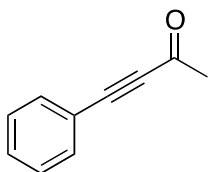

**3** ( $^1\text{H}$ )

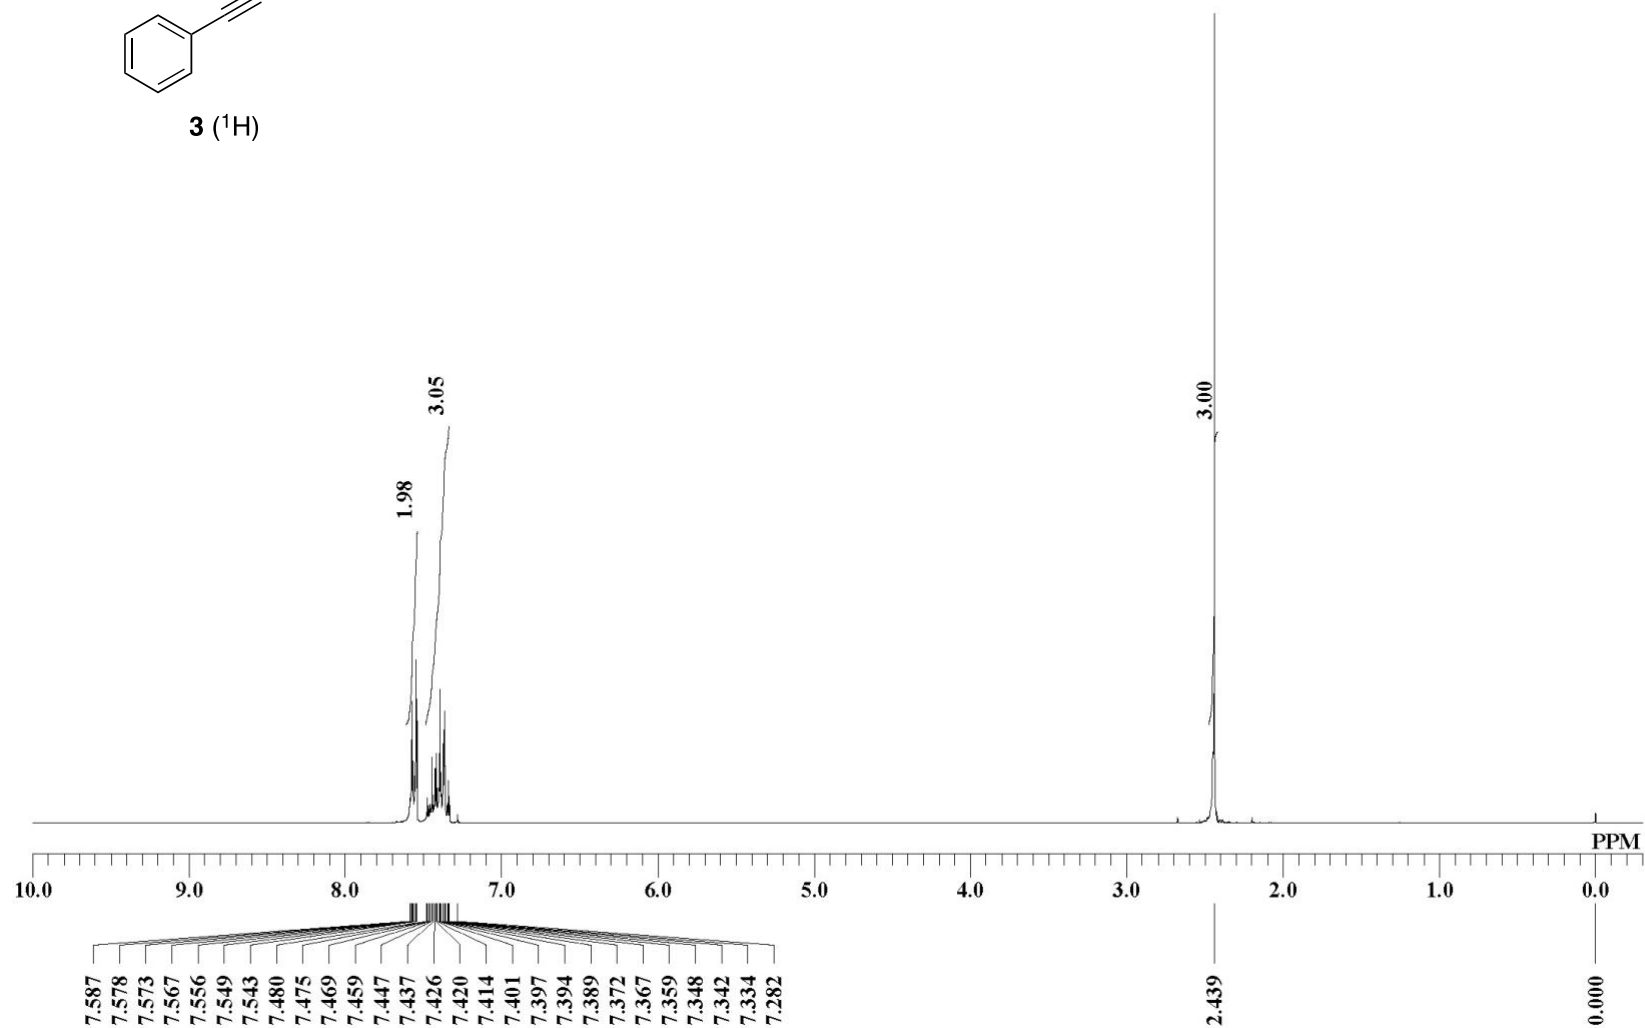

6KO-219 Fr3

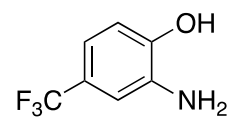

**5f** (<sup>1</sup>H)

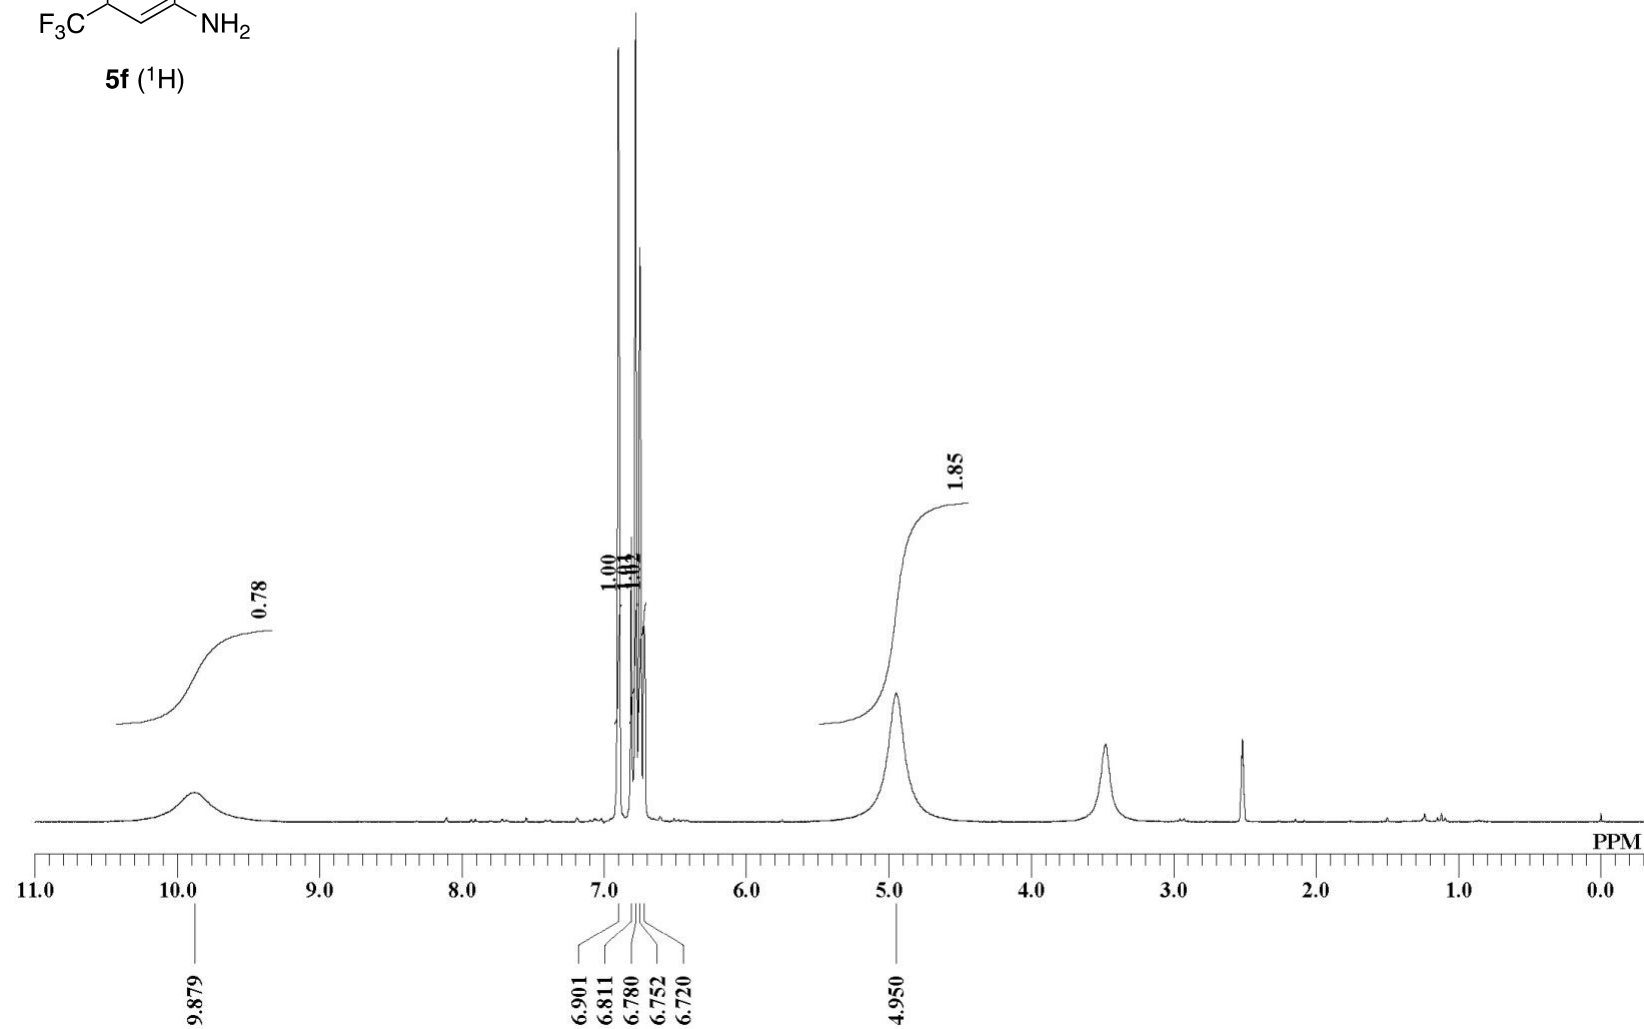

6KO-219 Fr 13C 500MHz

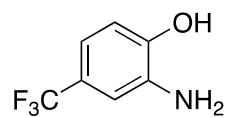

**5f** ( $^{13}\text{C}$ )

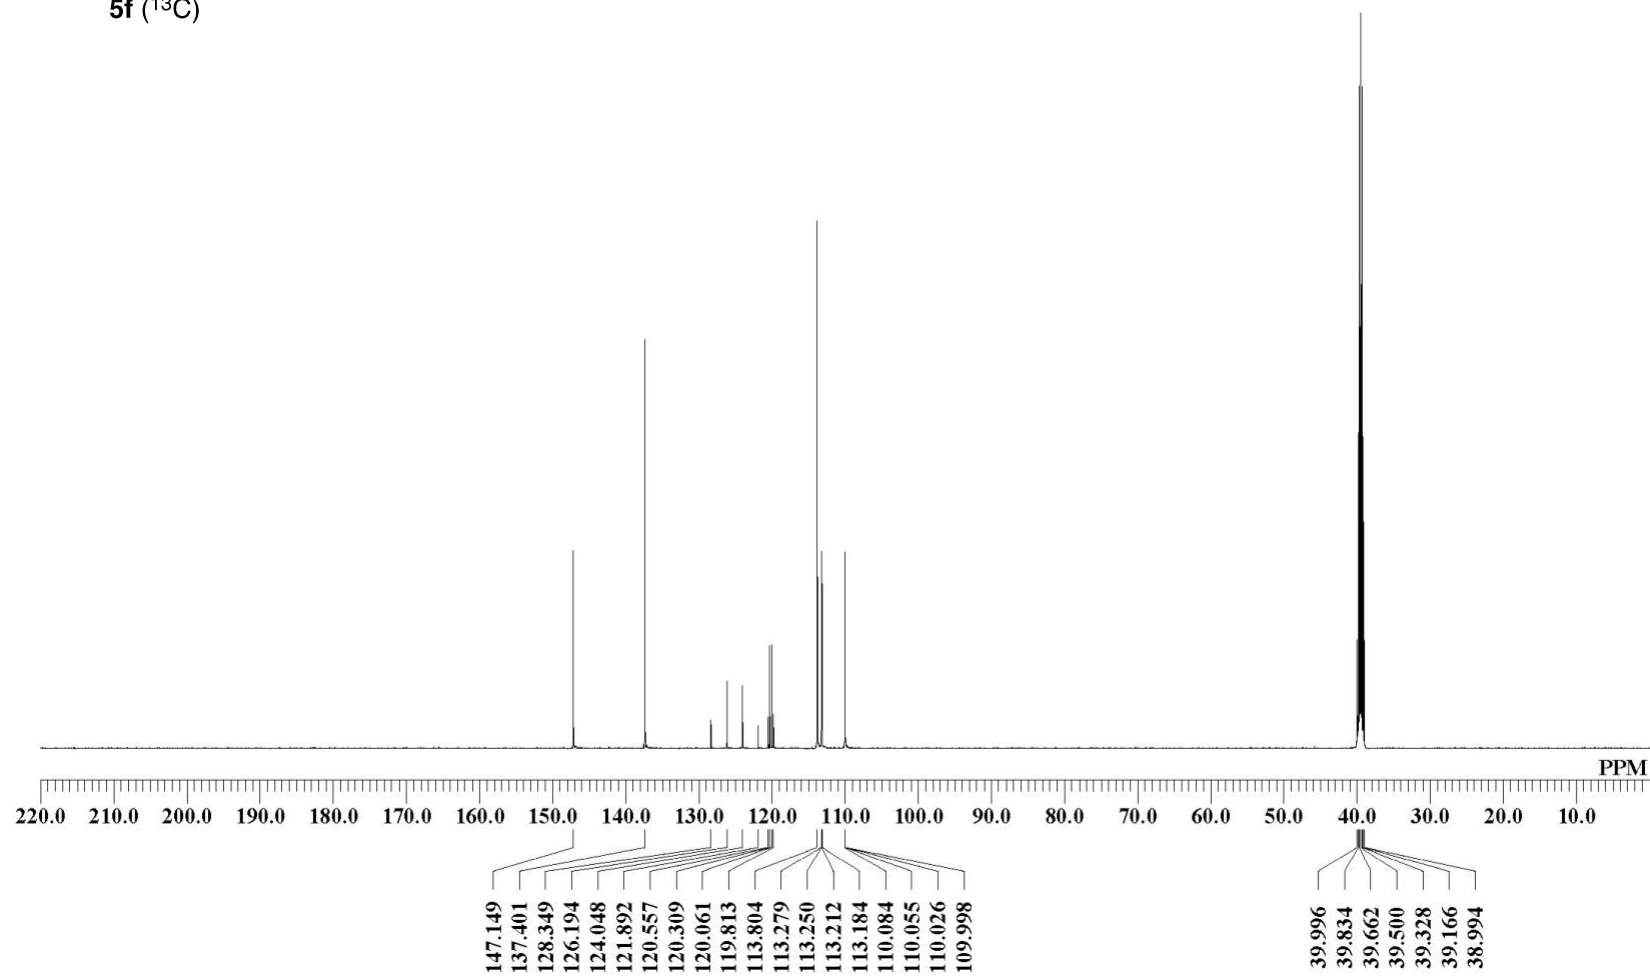

6KO-219 Fr 19F2

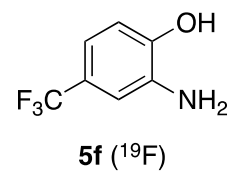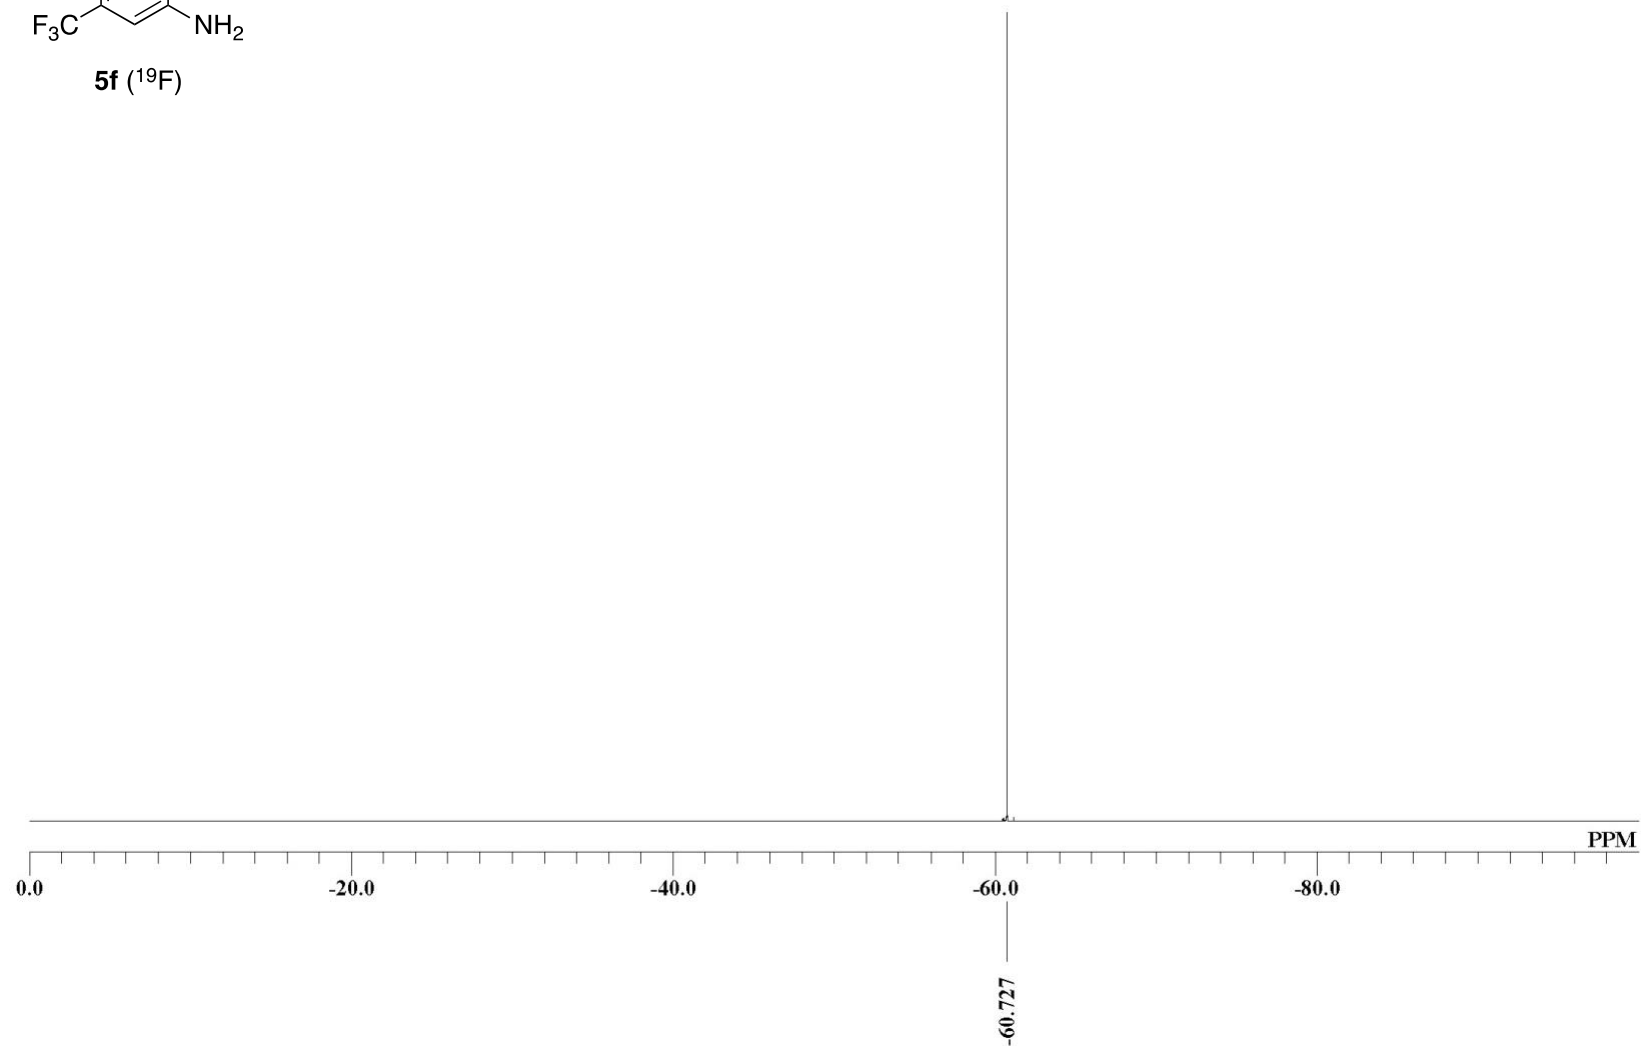

6KO-232 Fr

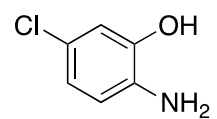

**5h** ( $^1\text{H}$ )

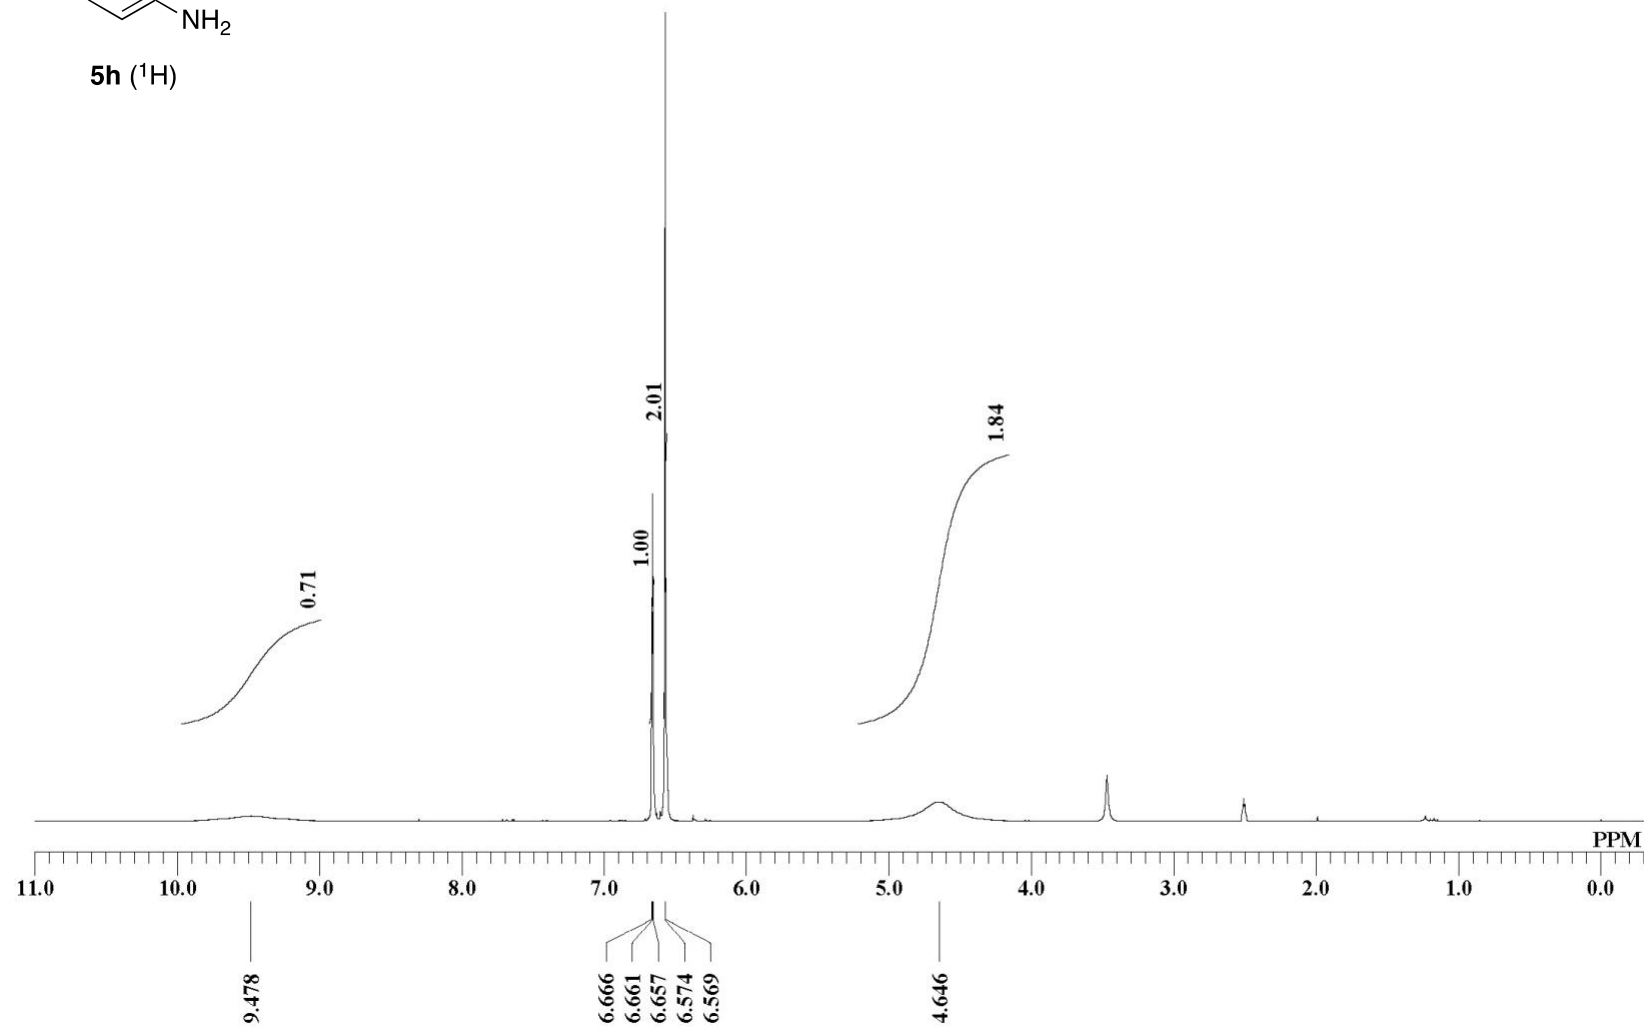

6KO-232 Fr  $^{13}\text{C}$

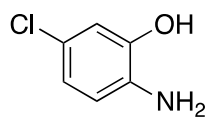

**5h** ( $^{13}\text{C}$ )

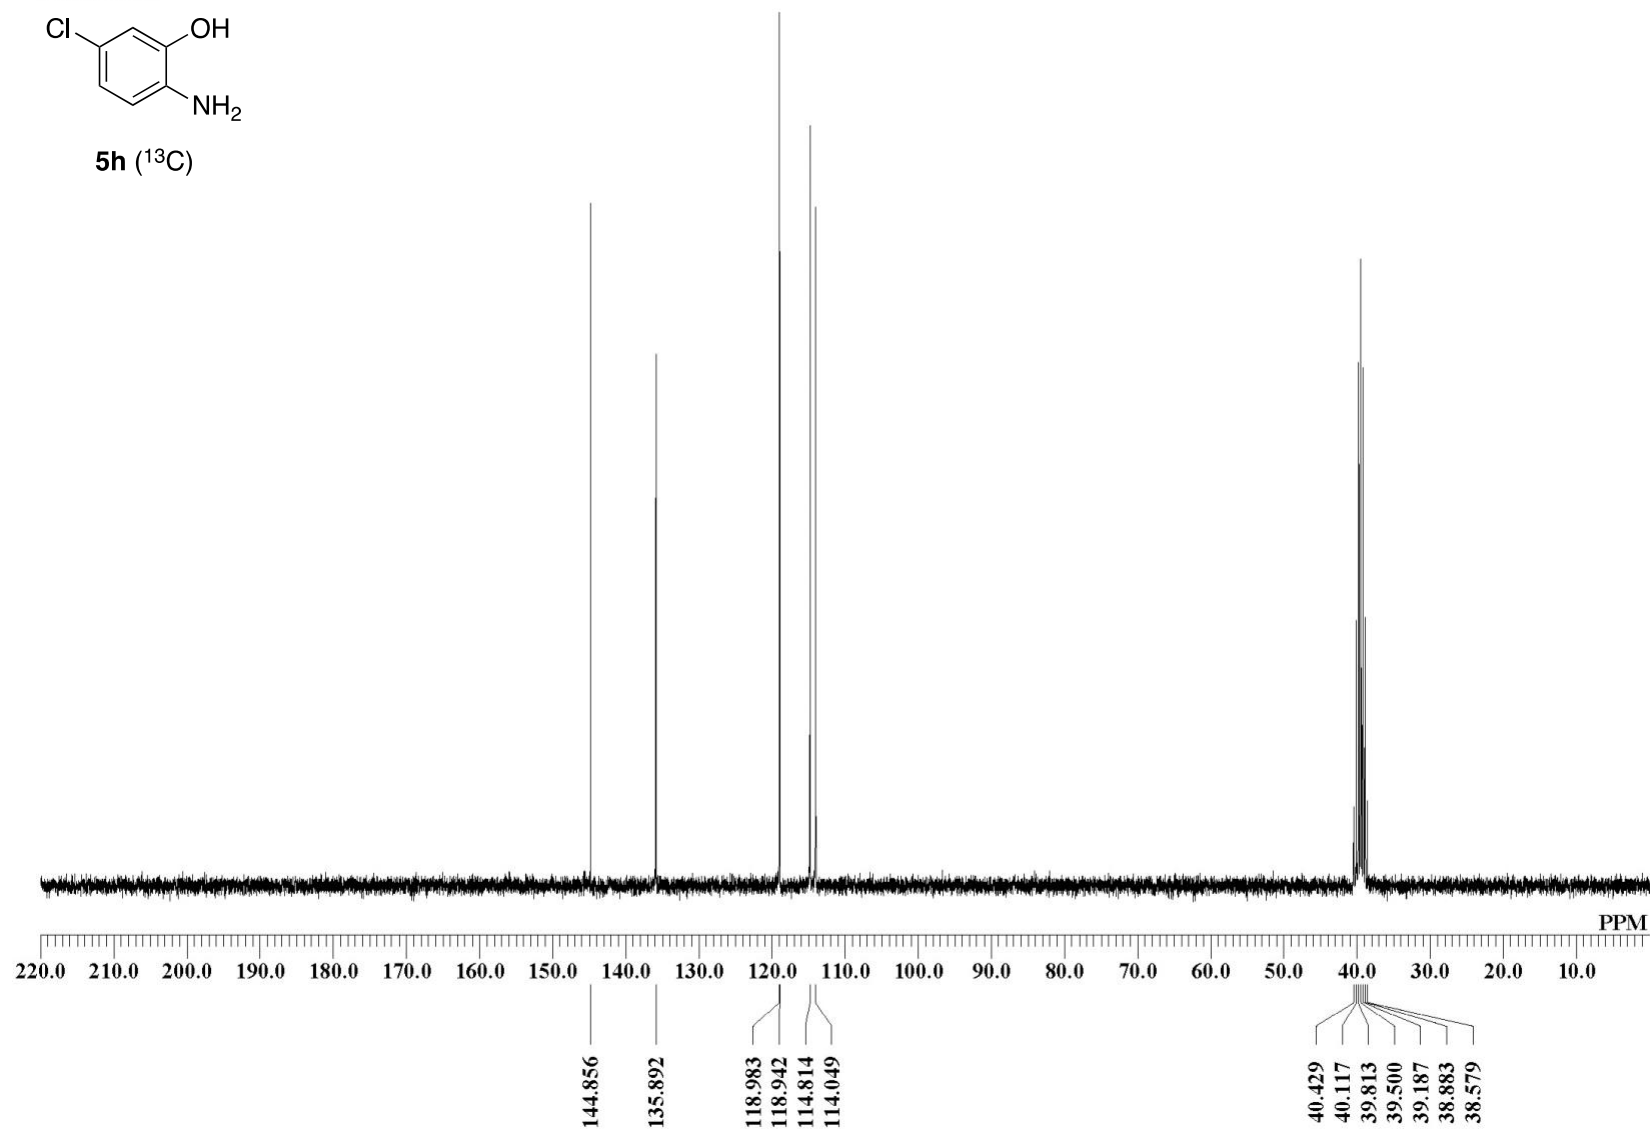

7YT-23-ft2

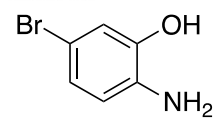

**5j** ( $^1\text{H}$ )

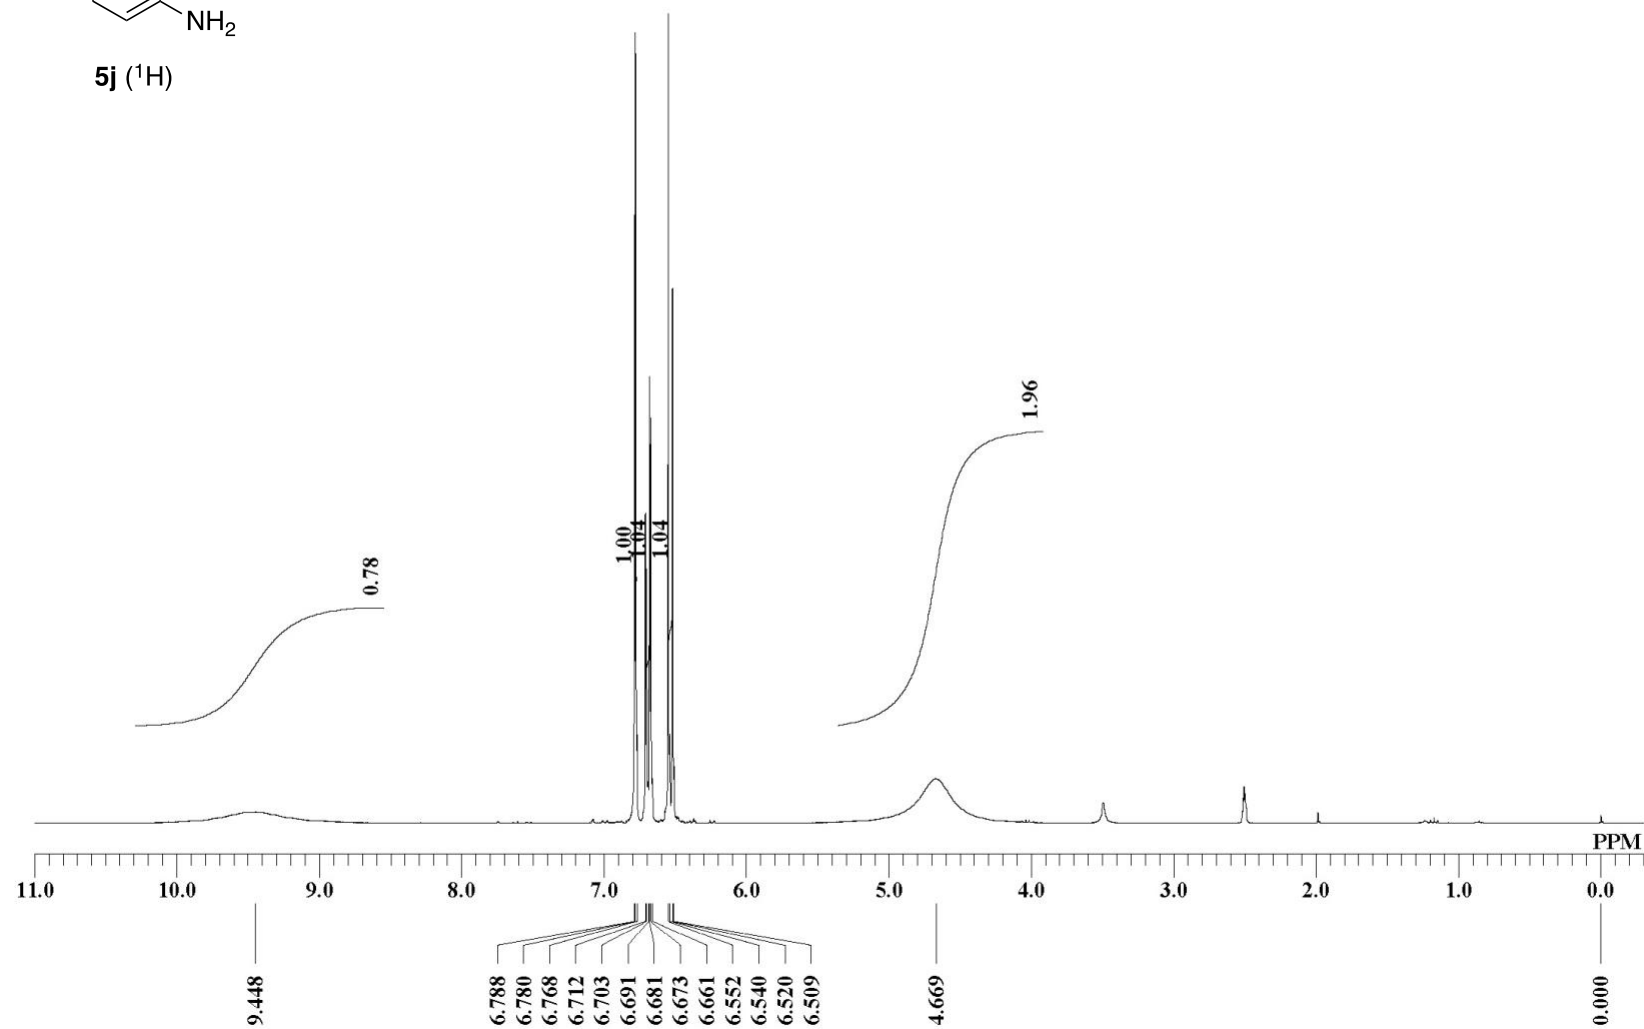

7YT-23 fr 13C DMSO

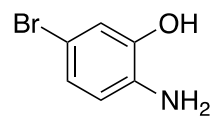

**5j** (<sup>13</sup>C)

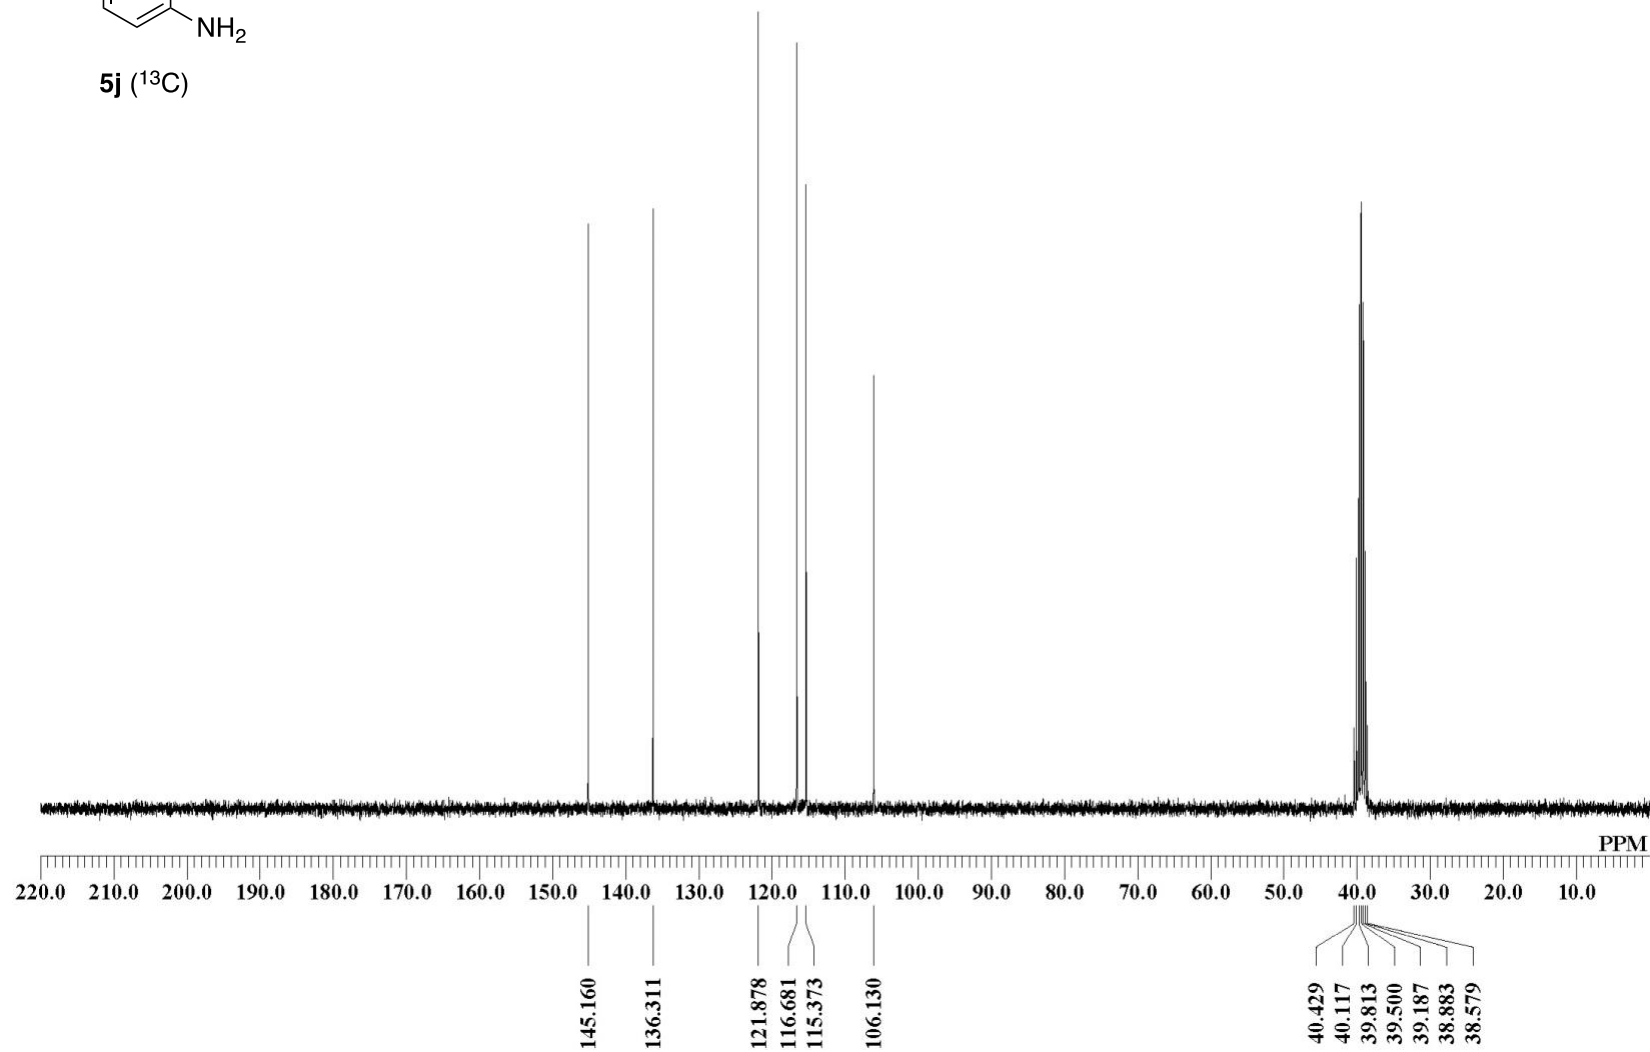

6KO-218 recy Fr

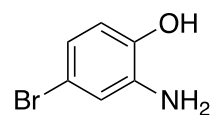

**5k** ( $^1\text{H}$ )

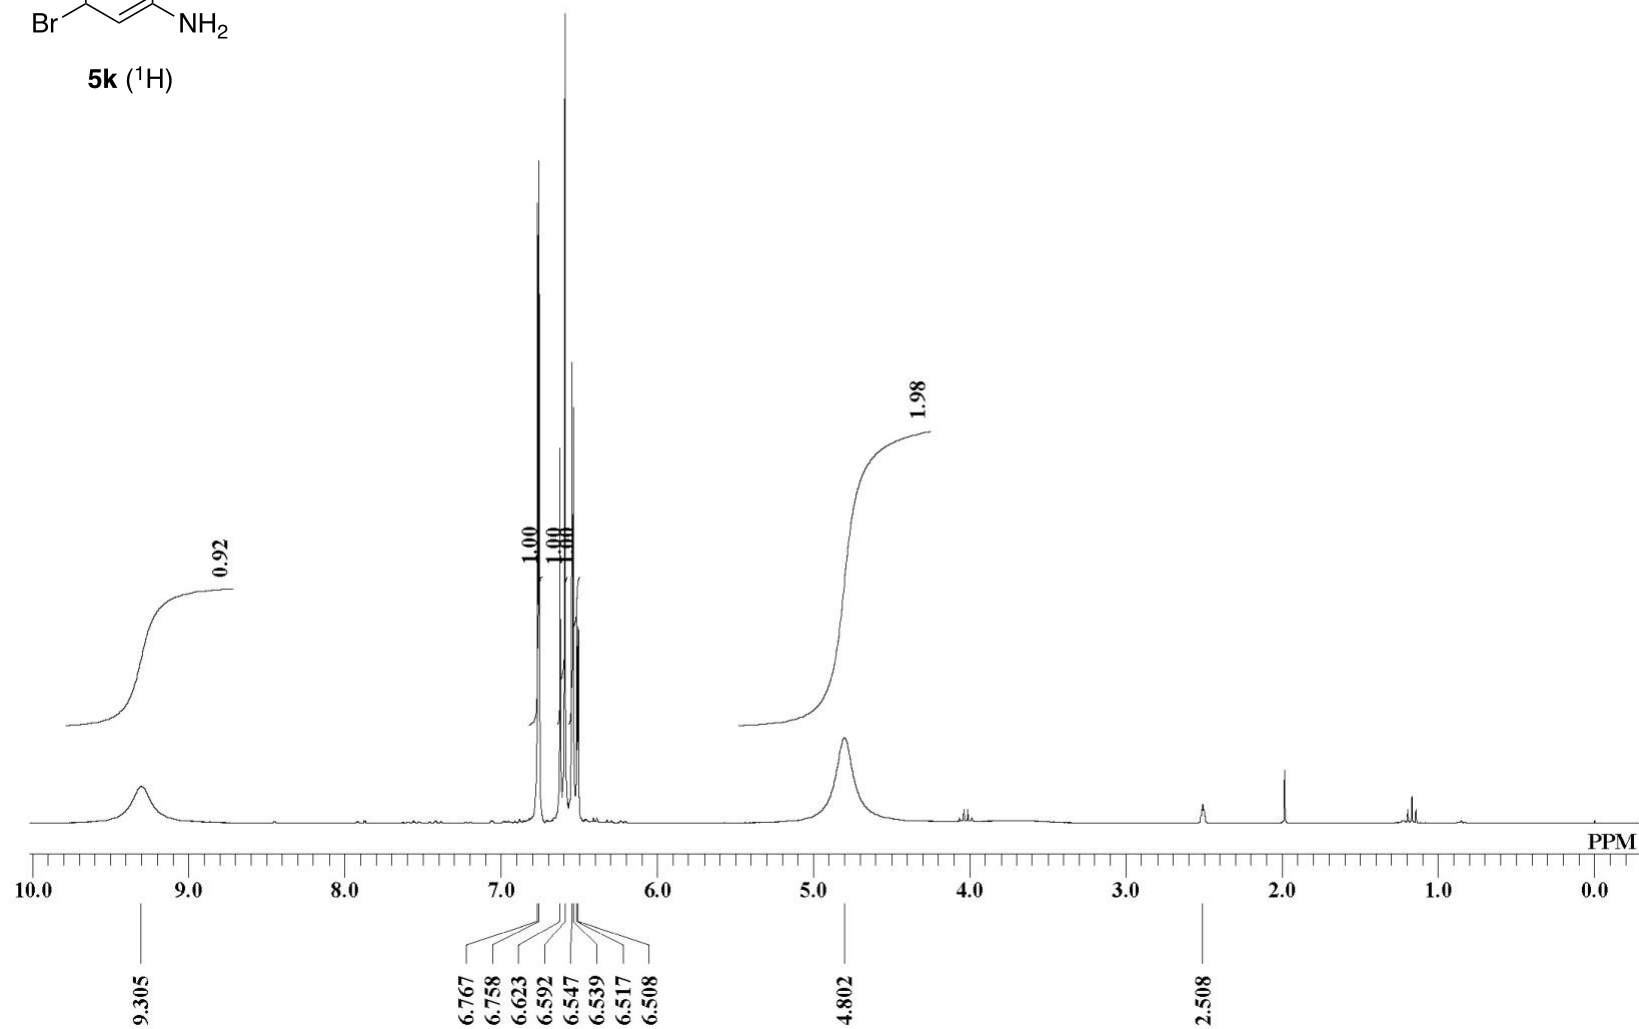

6KO-218 recy Fr  $^{13}\text{C}$

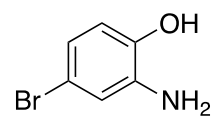

**5k** ( $^{13}\text{C}$ )

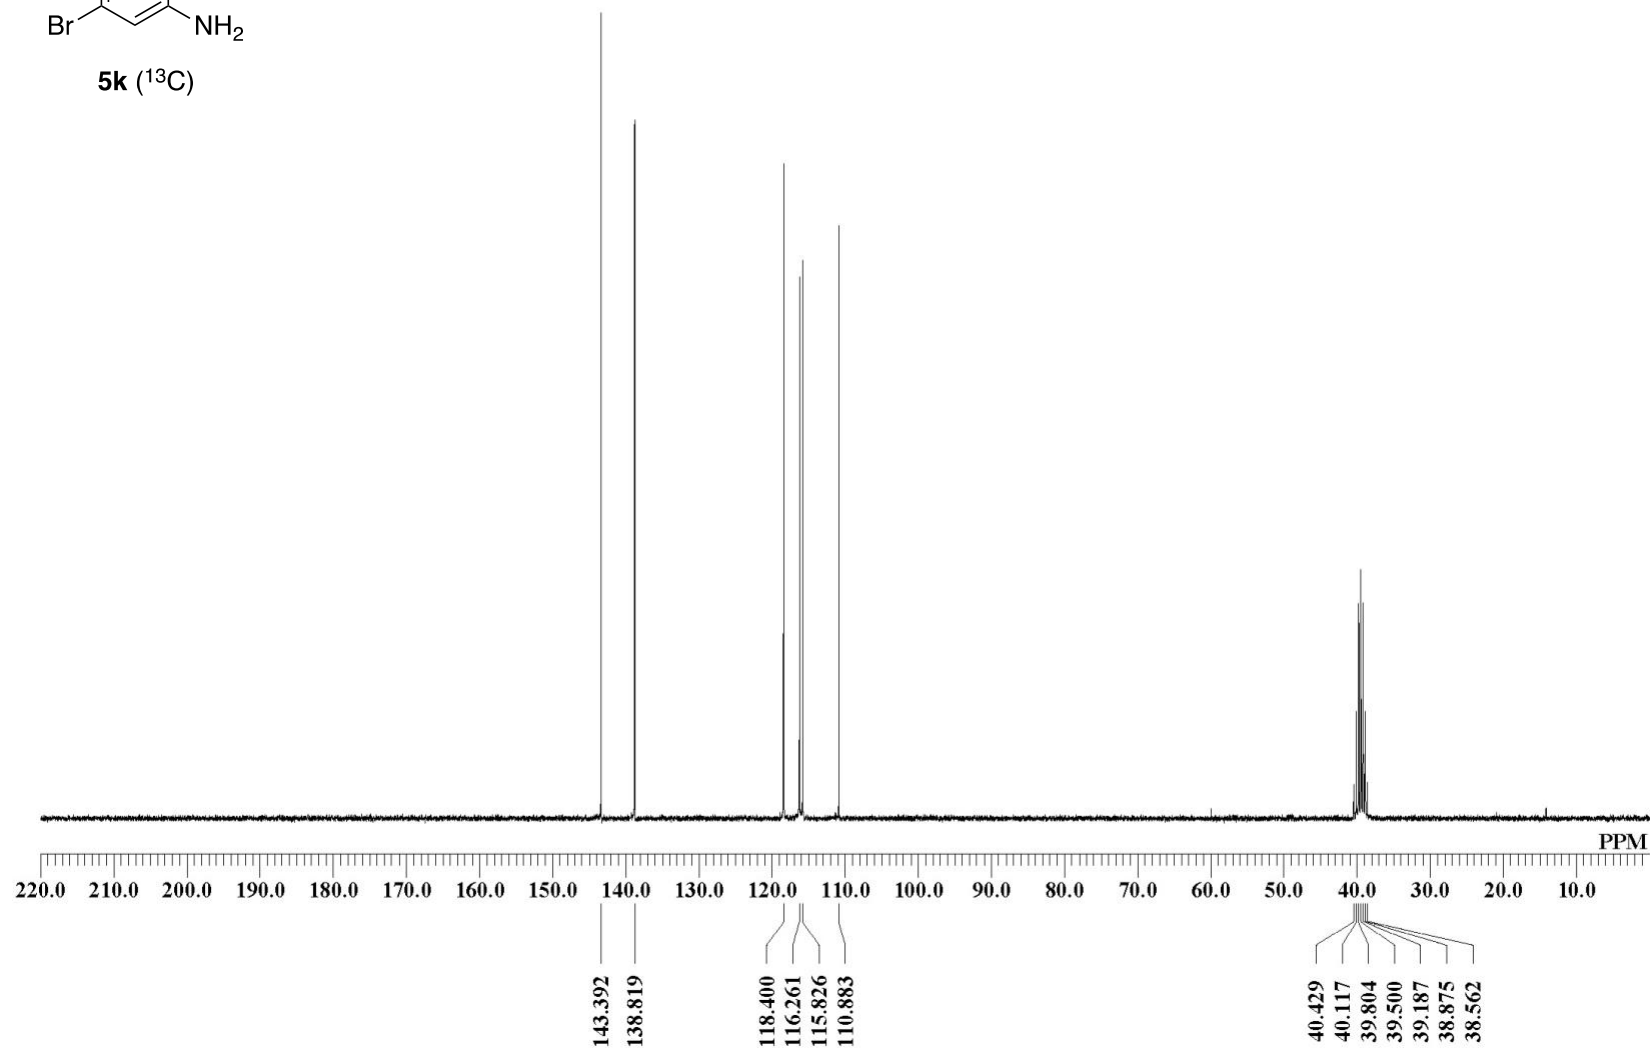

6KO-235 Fr

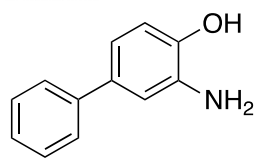

**5I** (<sup>1</sup>H)

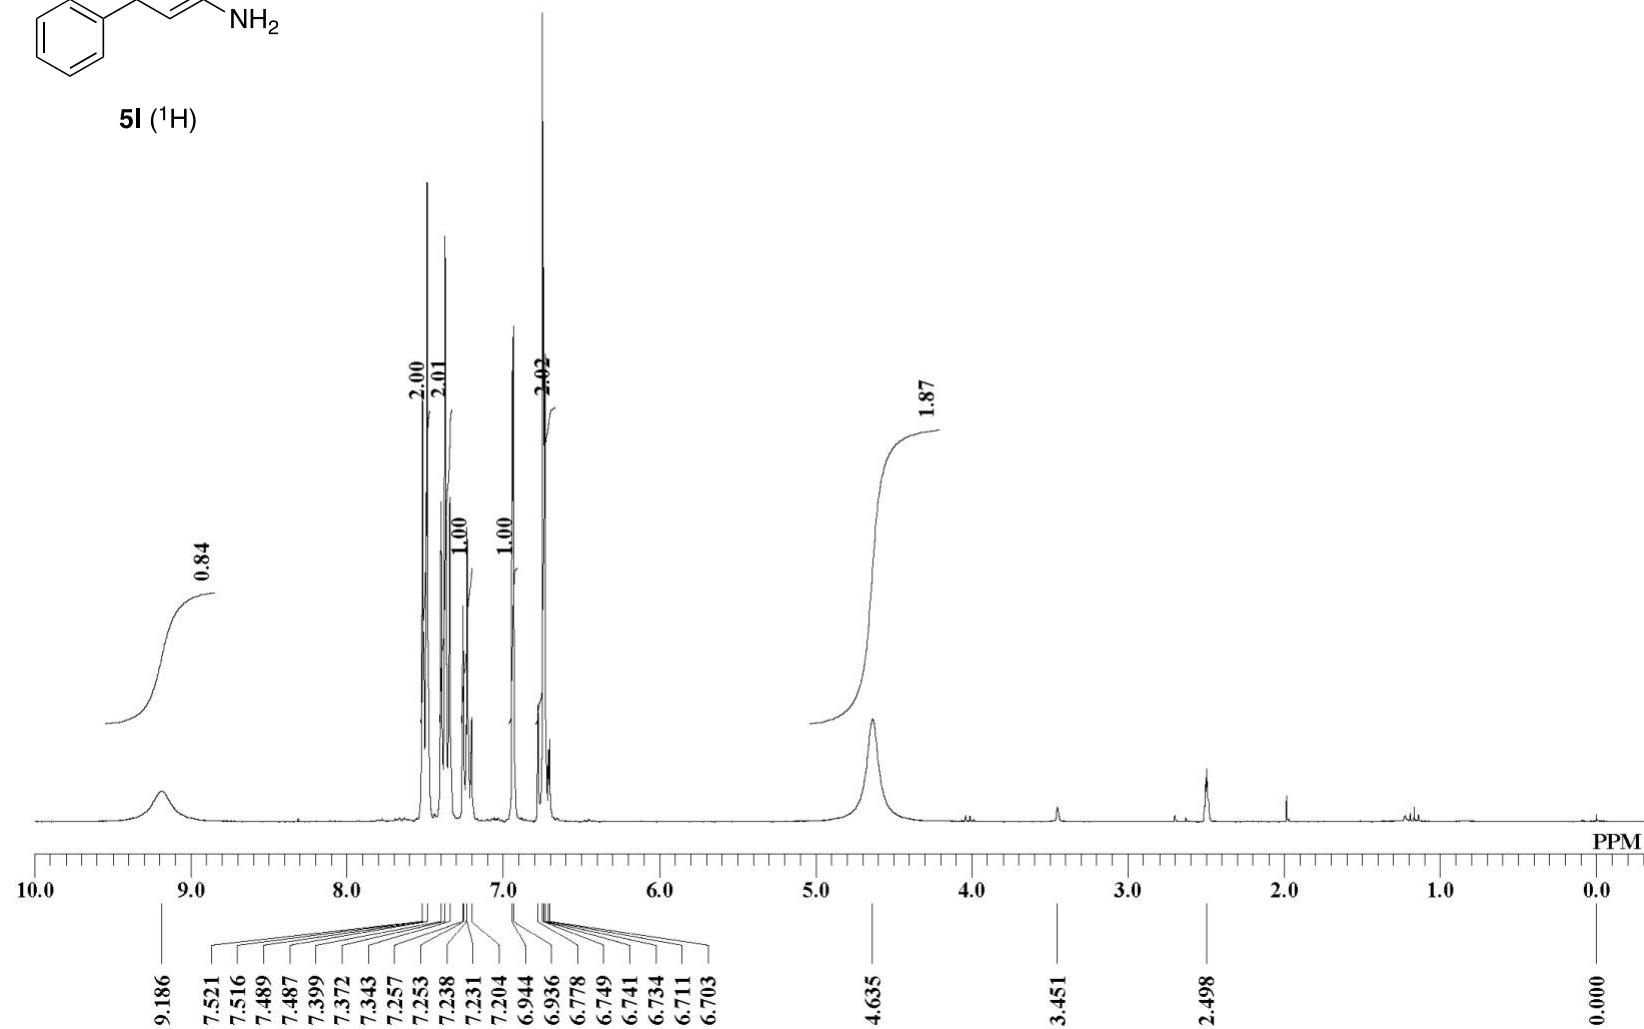

6KO-235 Fr  $^{13}\text{C}$

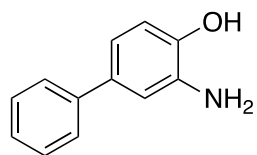

**5I** ( $^{13}\text{C}$ )

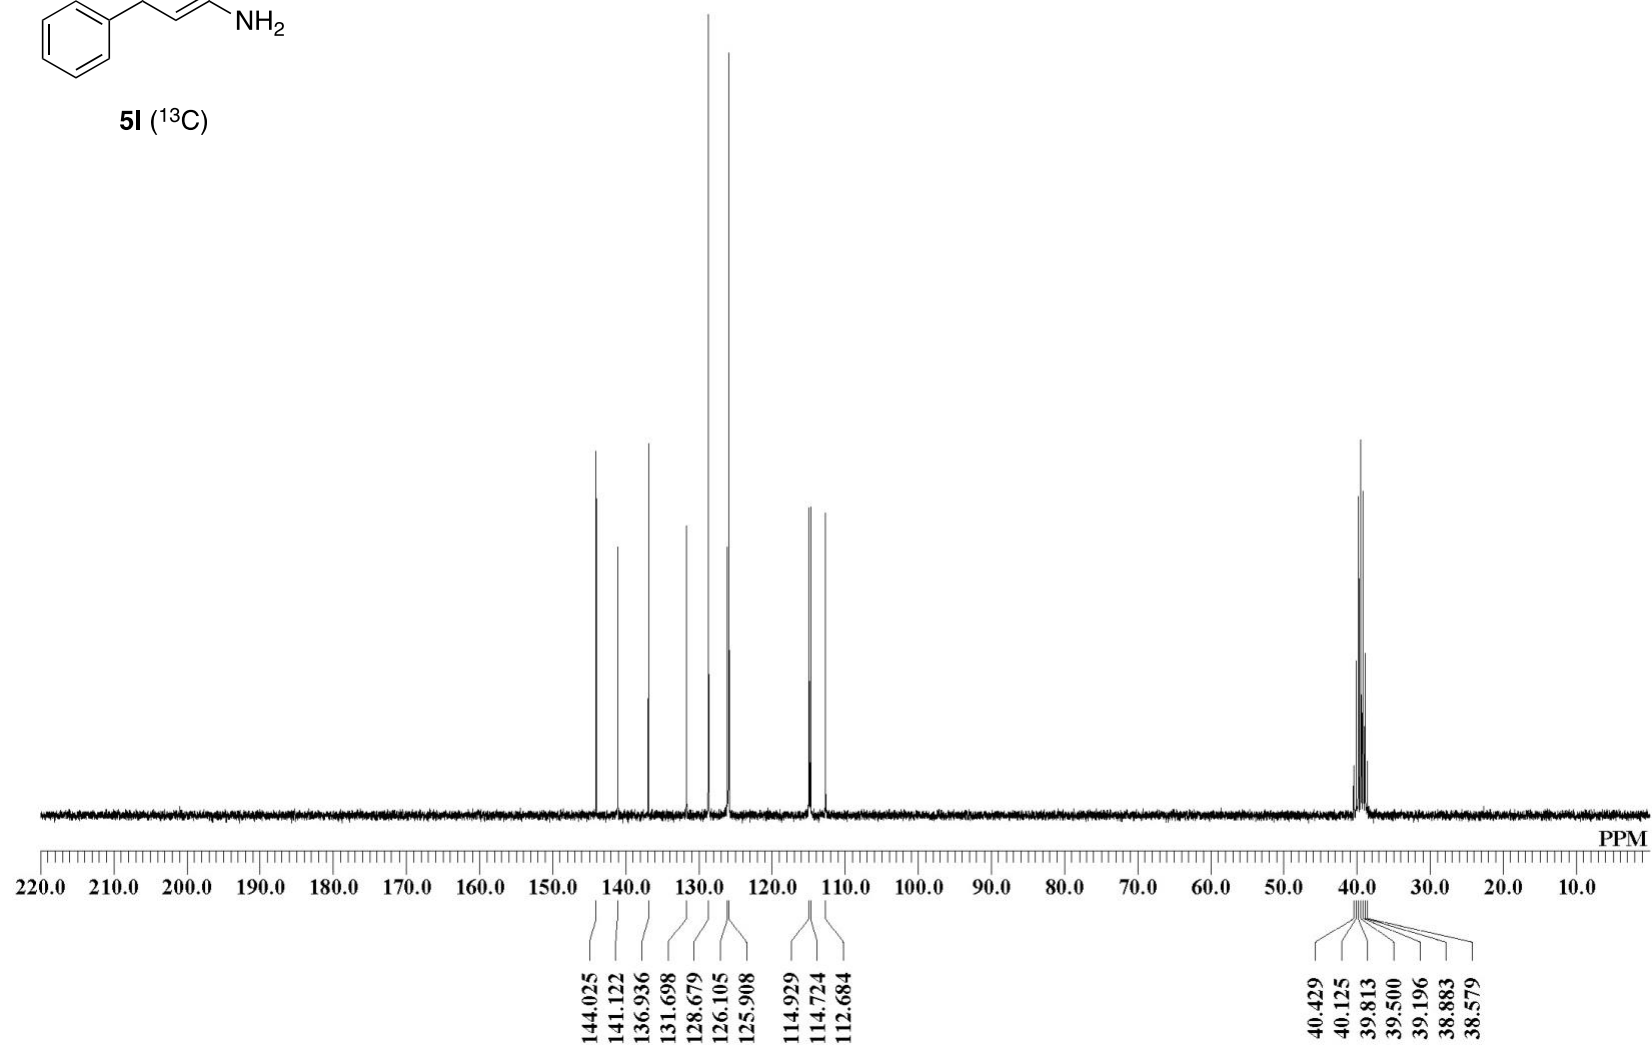

6KO-229 Fr

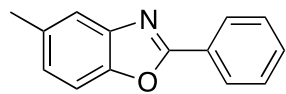

**6aa** ( $^1\text{H}$ )

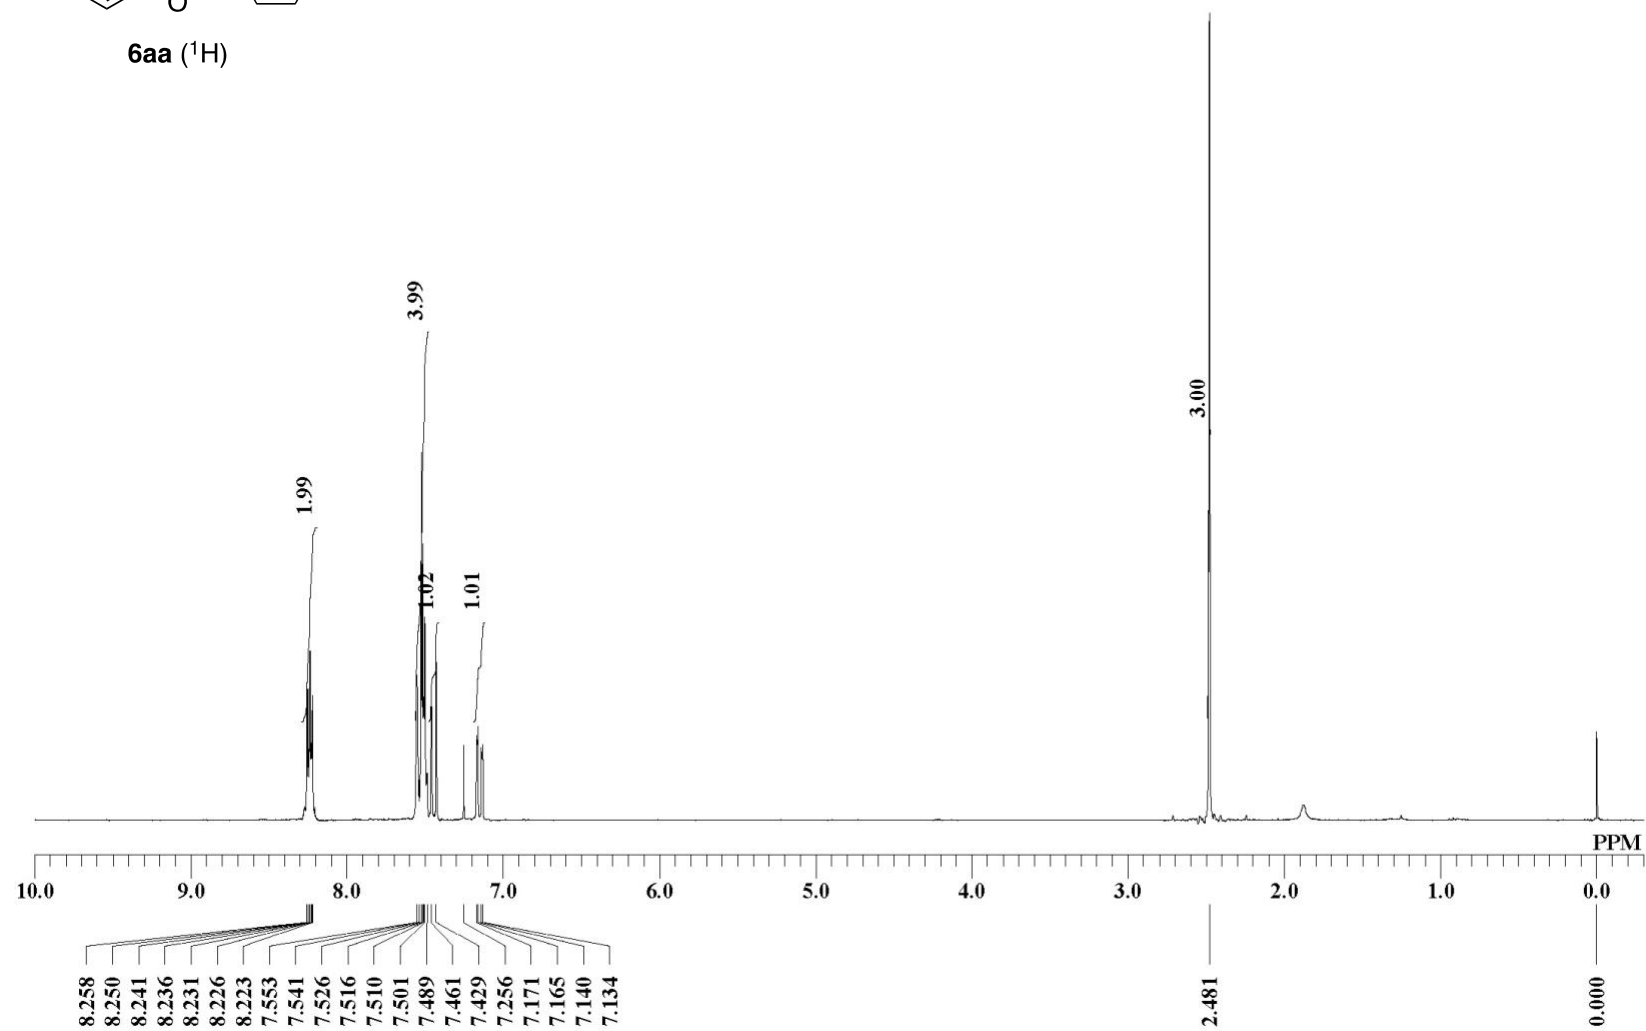

6KO-217 Fr3

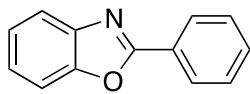

**6ab** ( $^1\text{H}$ )

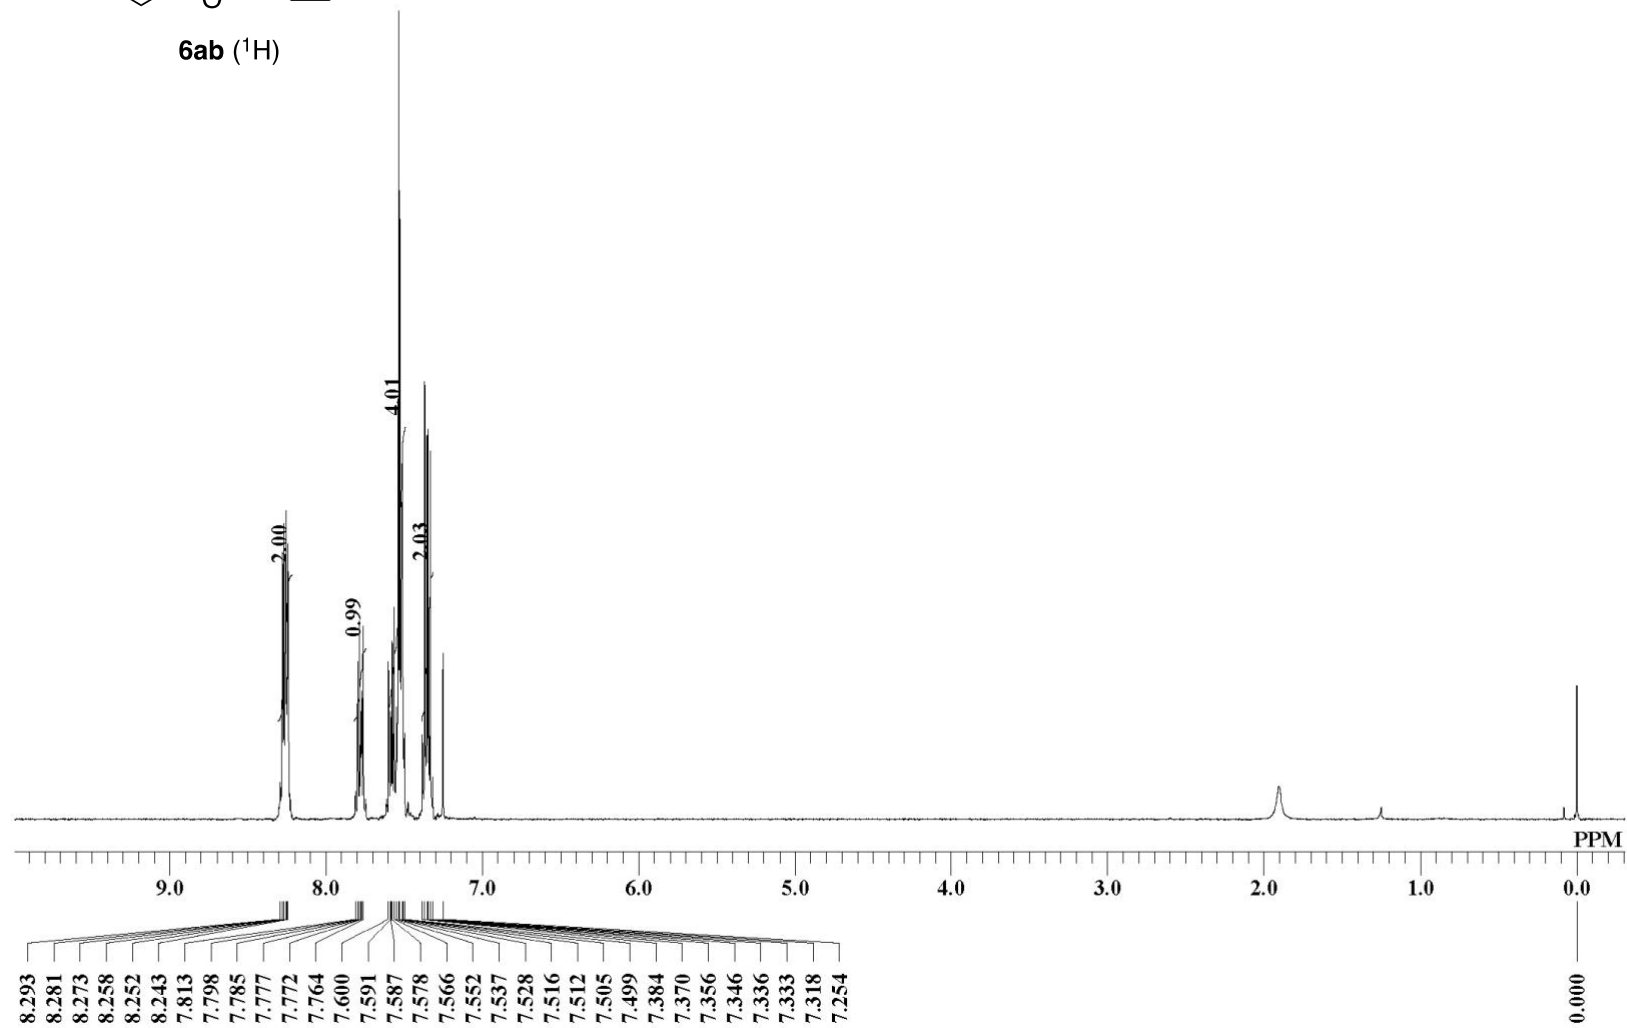

6KO-225 Fr2

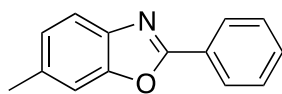

**6ac** (<sup>1</sup>H)

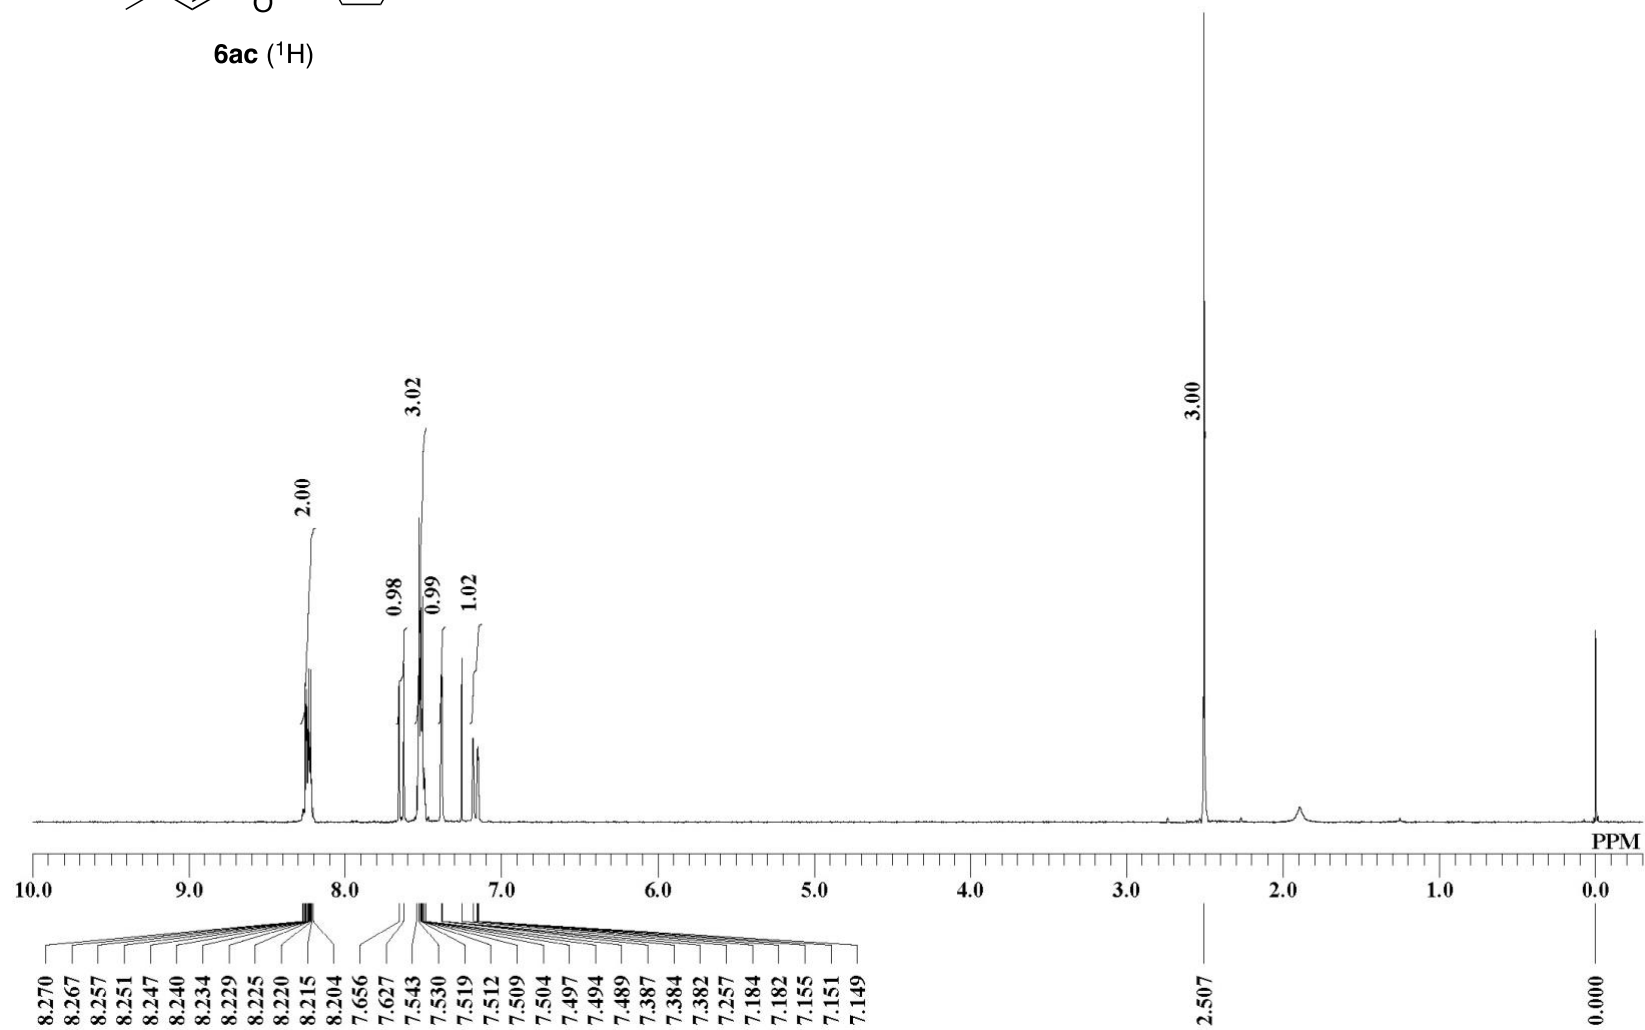

6KO-254 Fr

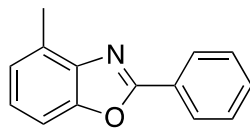

**6ad** ( $^1\text{H}$ )

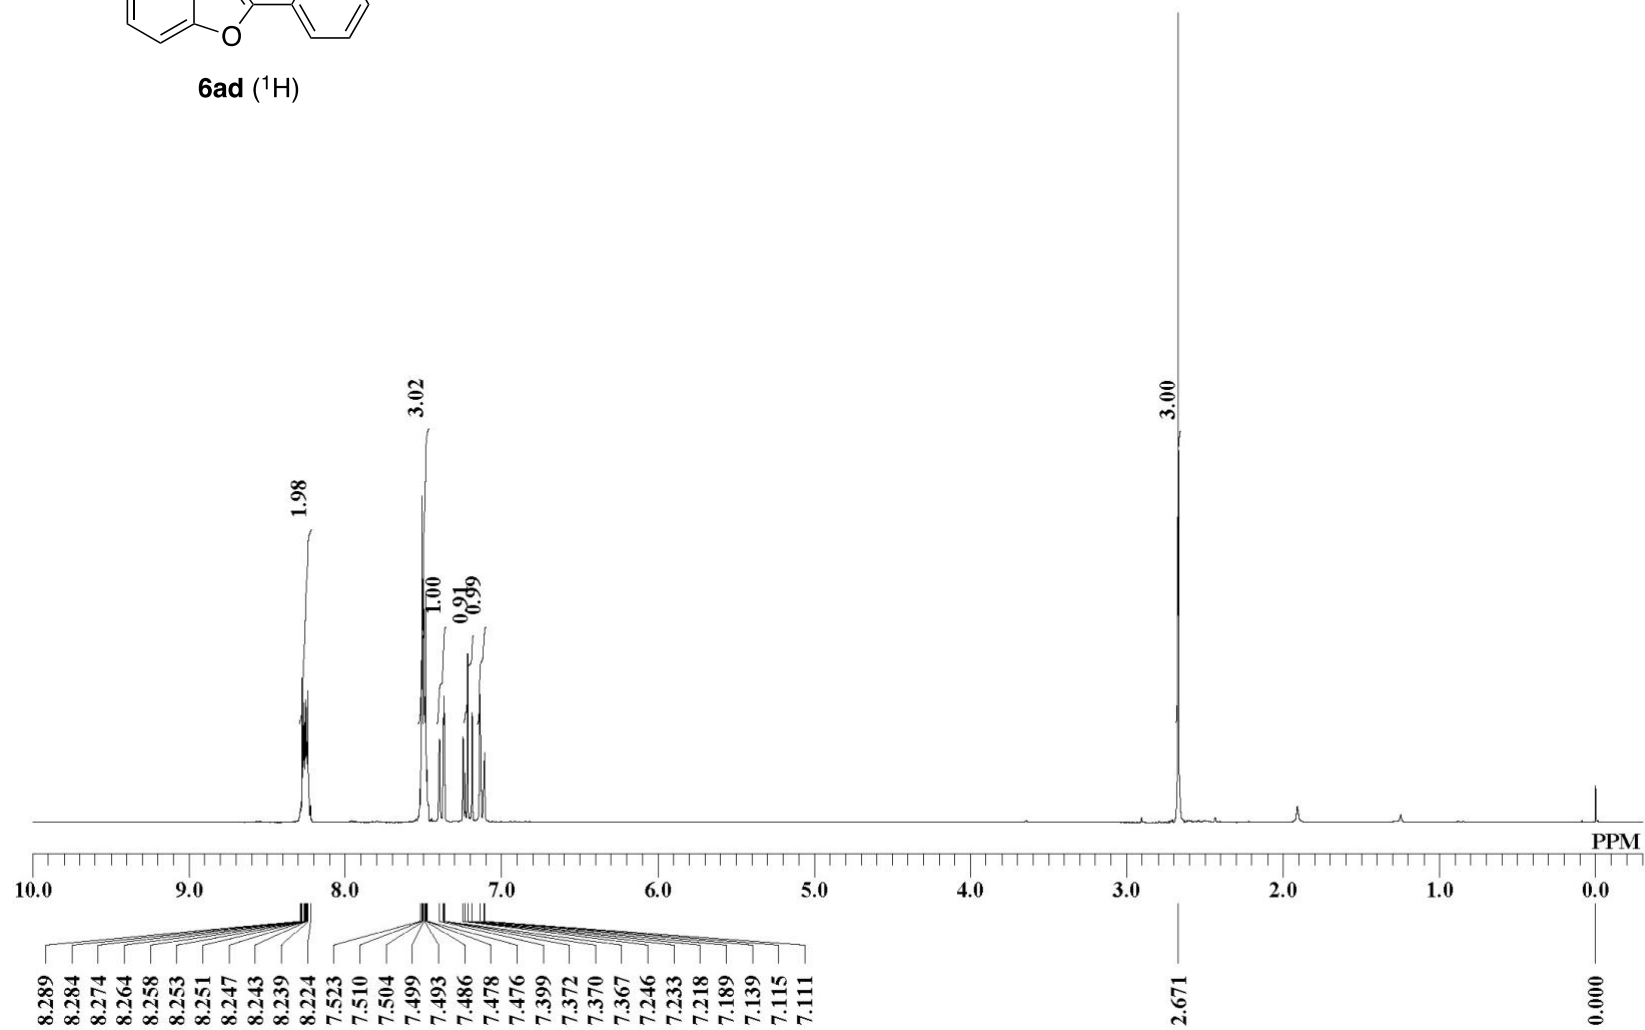

6KO-255 Fr2

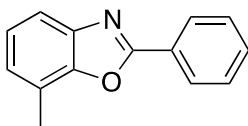

**6ae** ( $^1\text{H}$ )

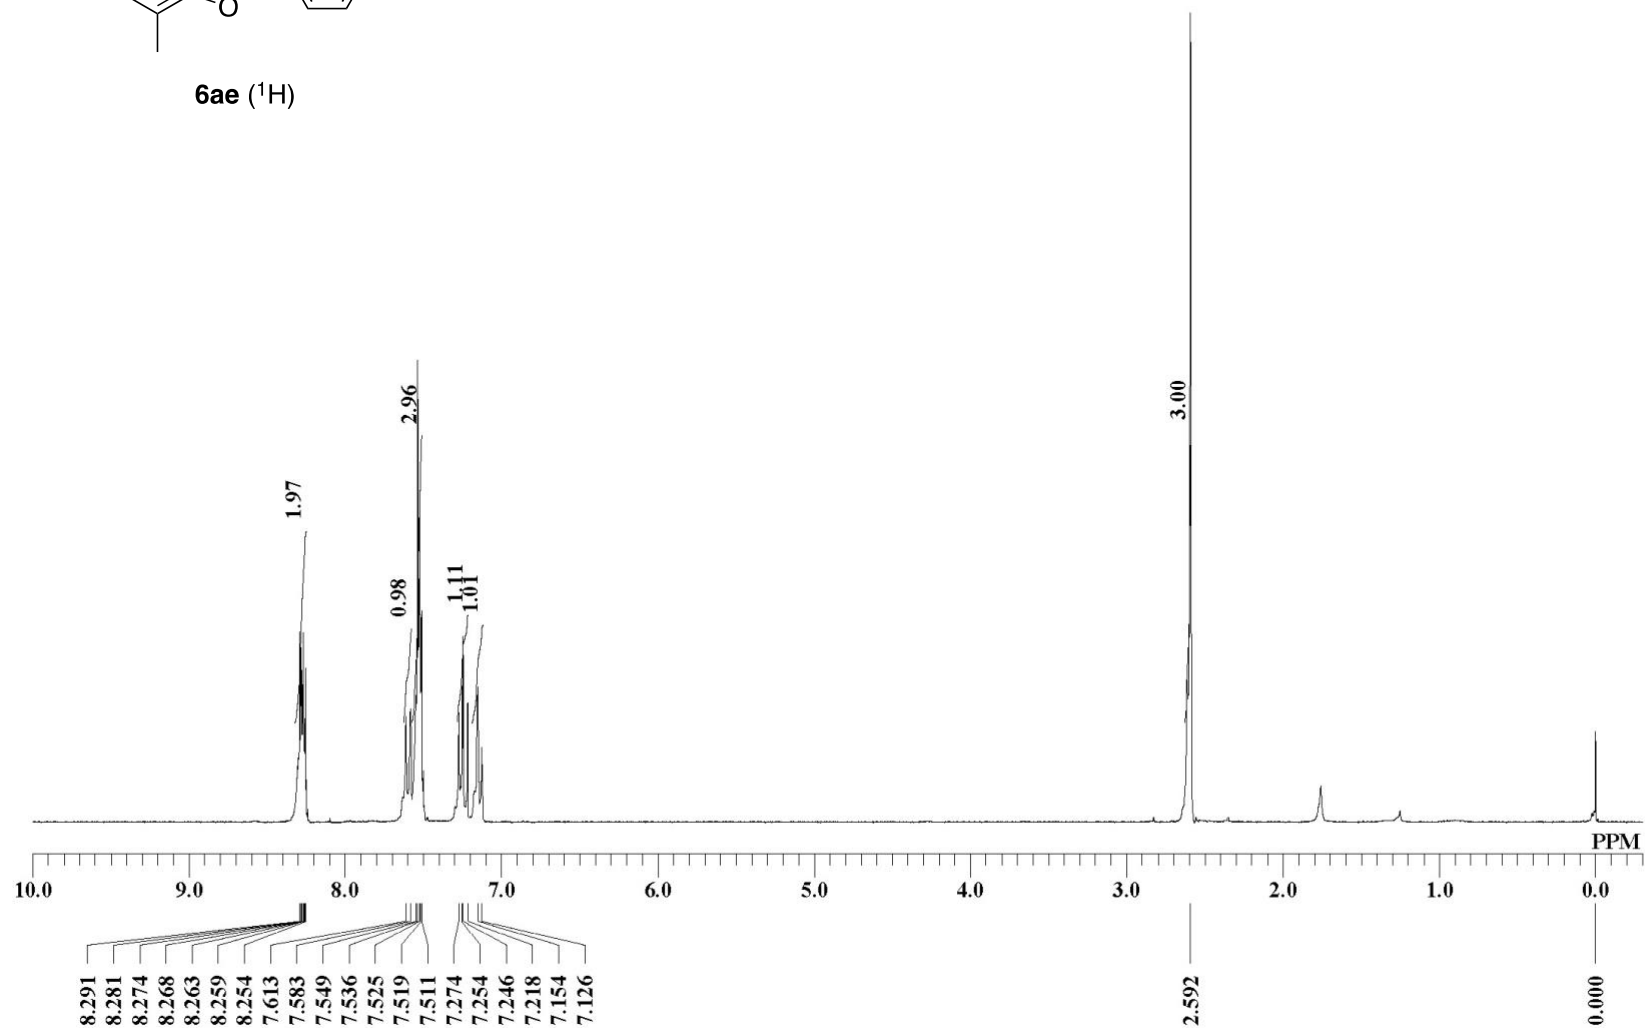

6KO-255 Fr 13C 500MHz

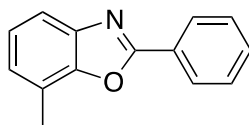

**6ae** ( $^{13}\text{C}$ )

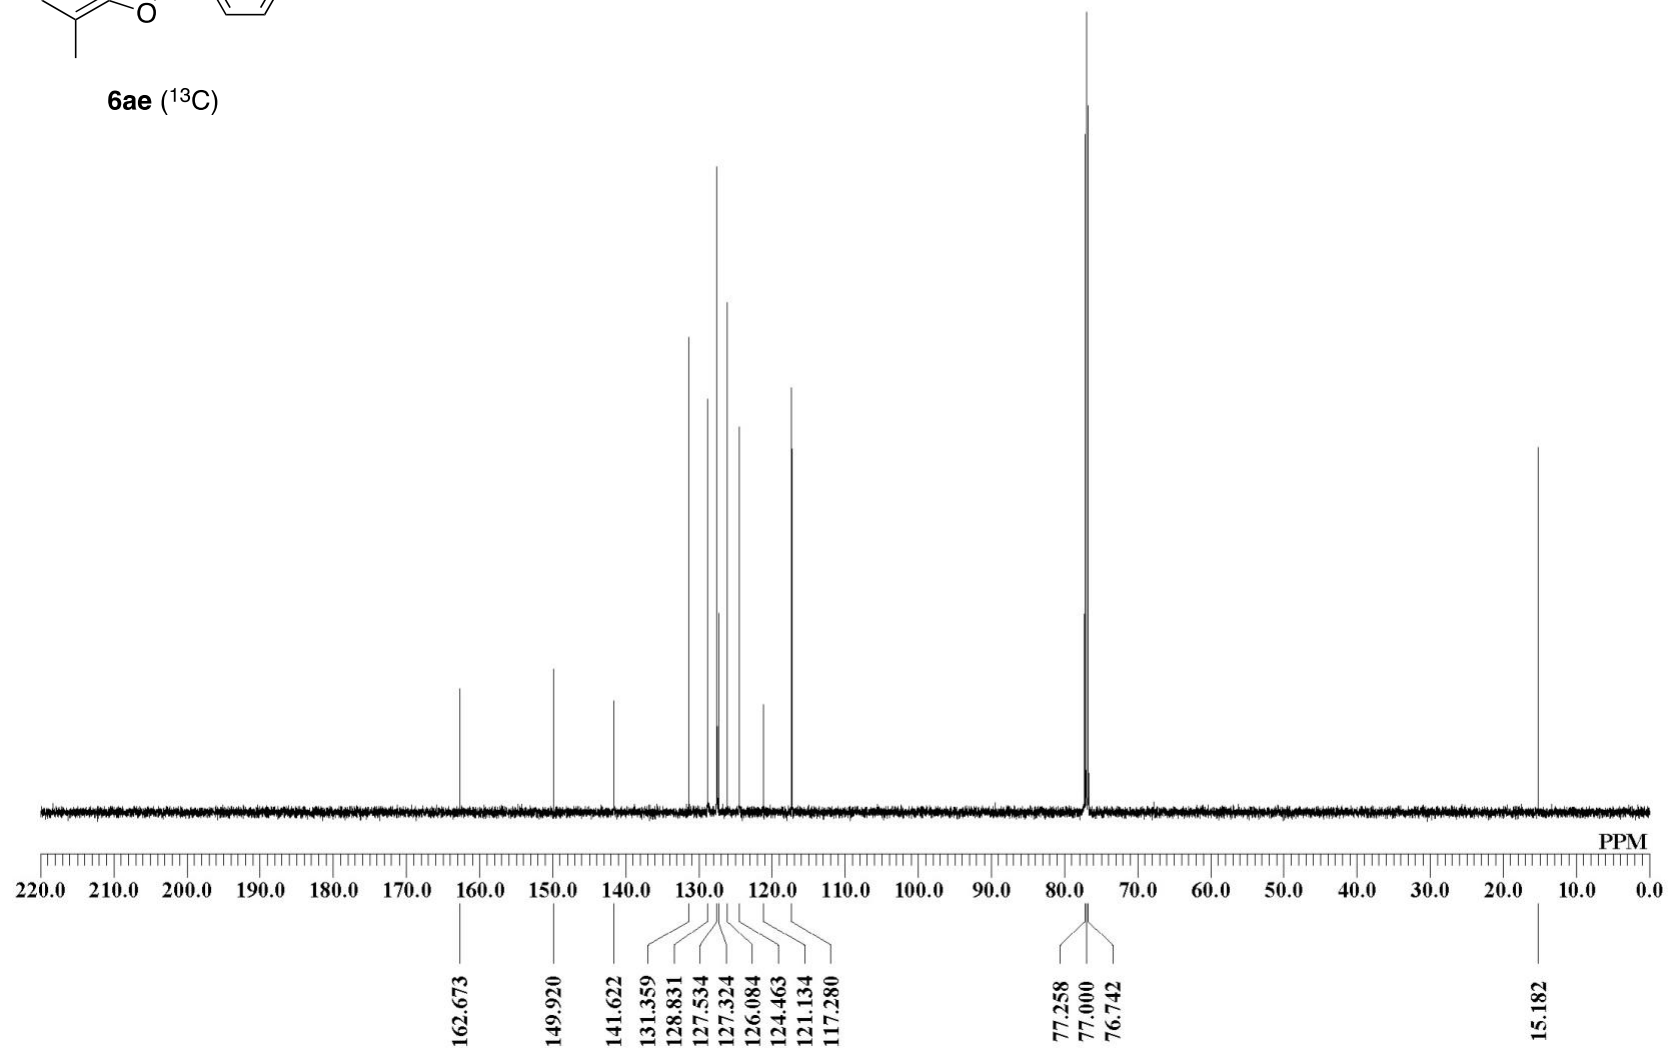

6KO-234 Fr

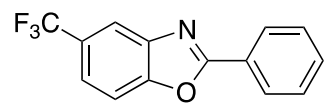

**6af** ( $^1\text{H}$ )

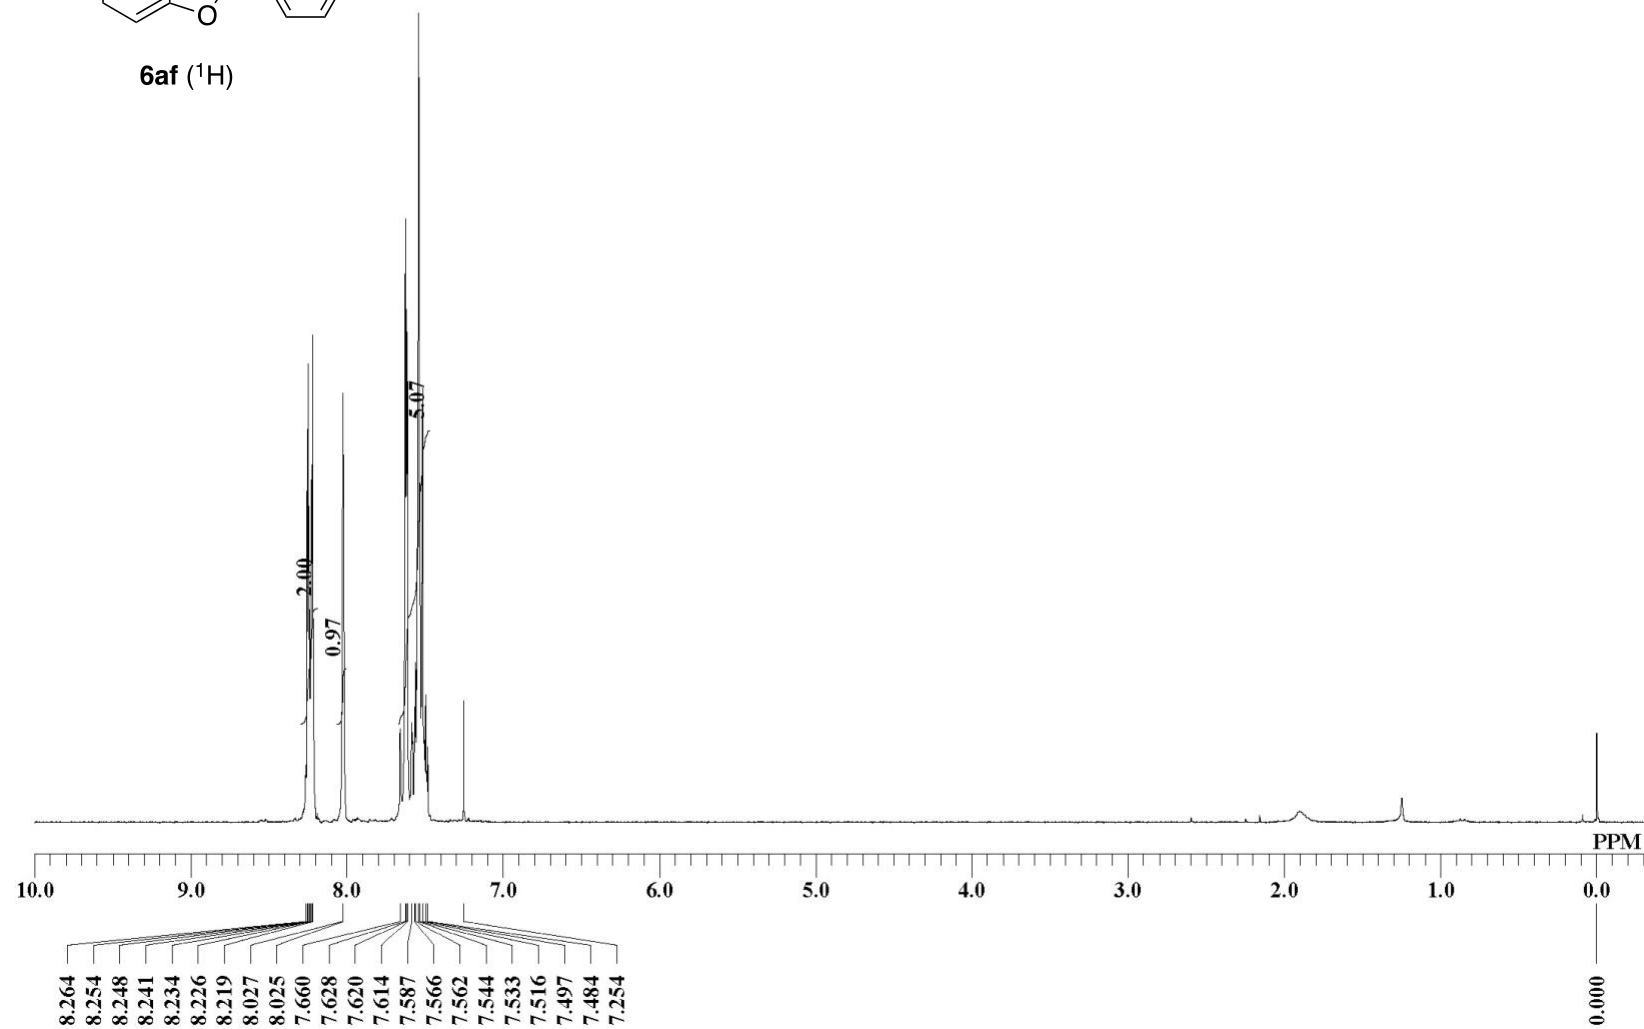

6KO-234 Fr 13C 500MHz 2

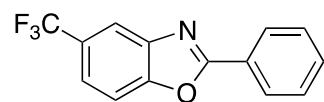

**6af** (<sup>13</sup>C)

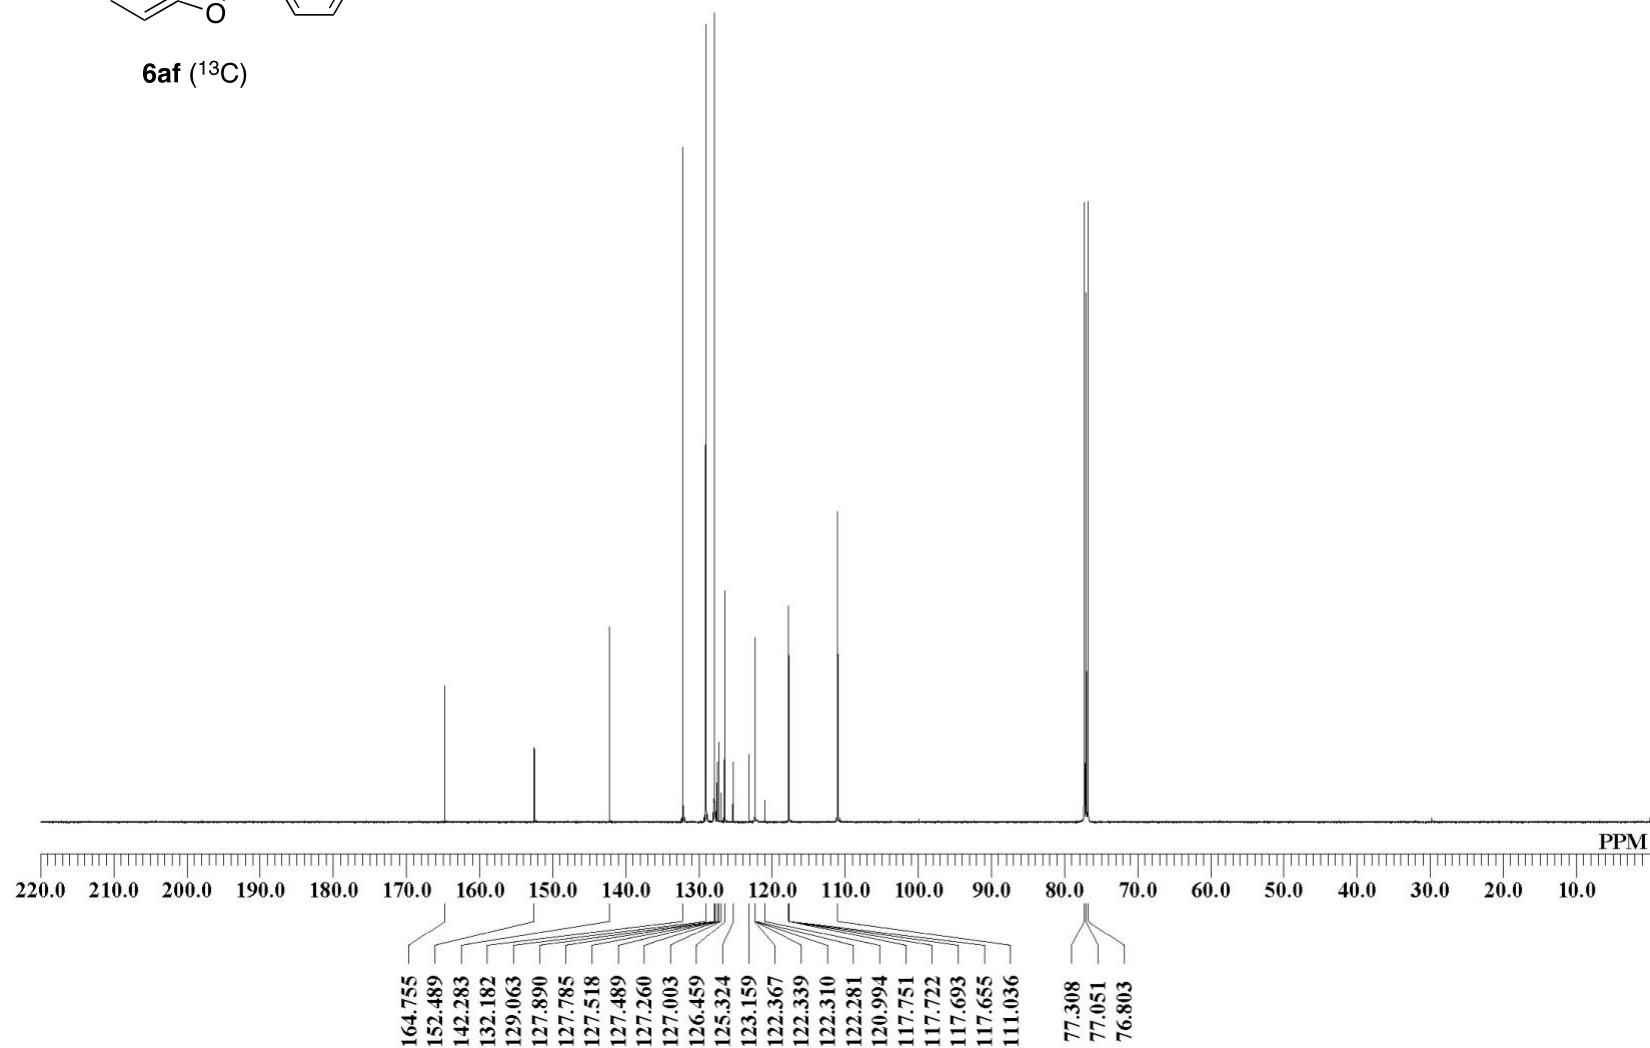

6KO-234 Fr 19F

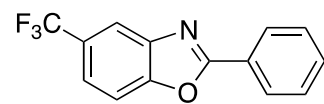

**6af** (<sup>19</sup>F)

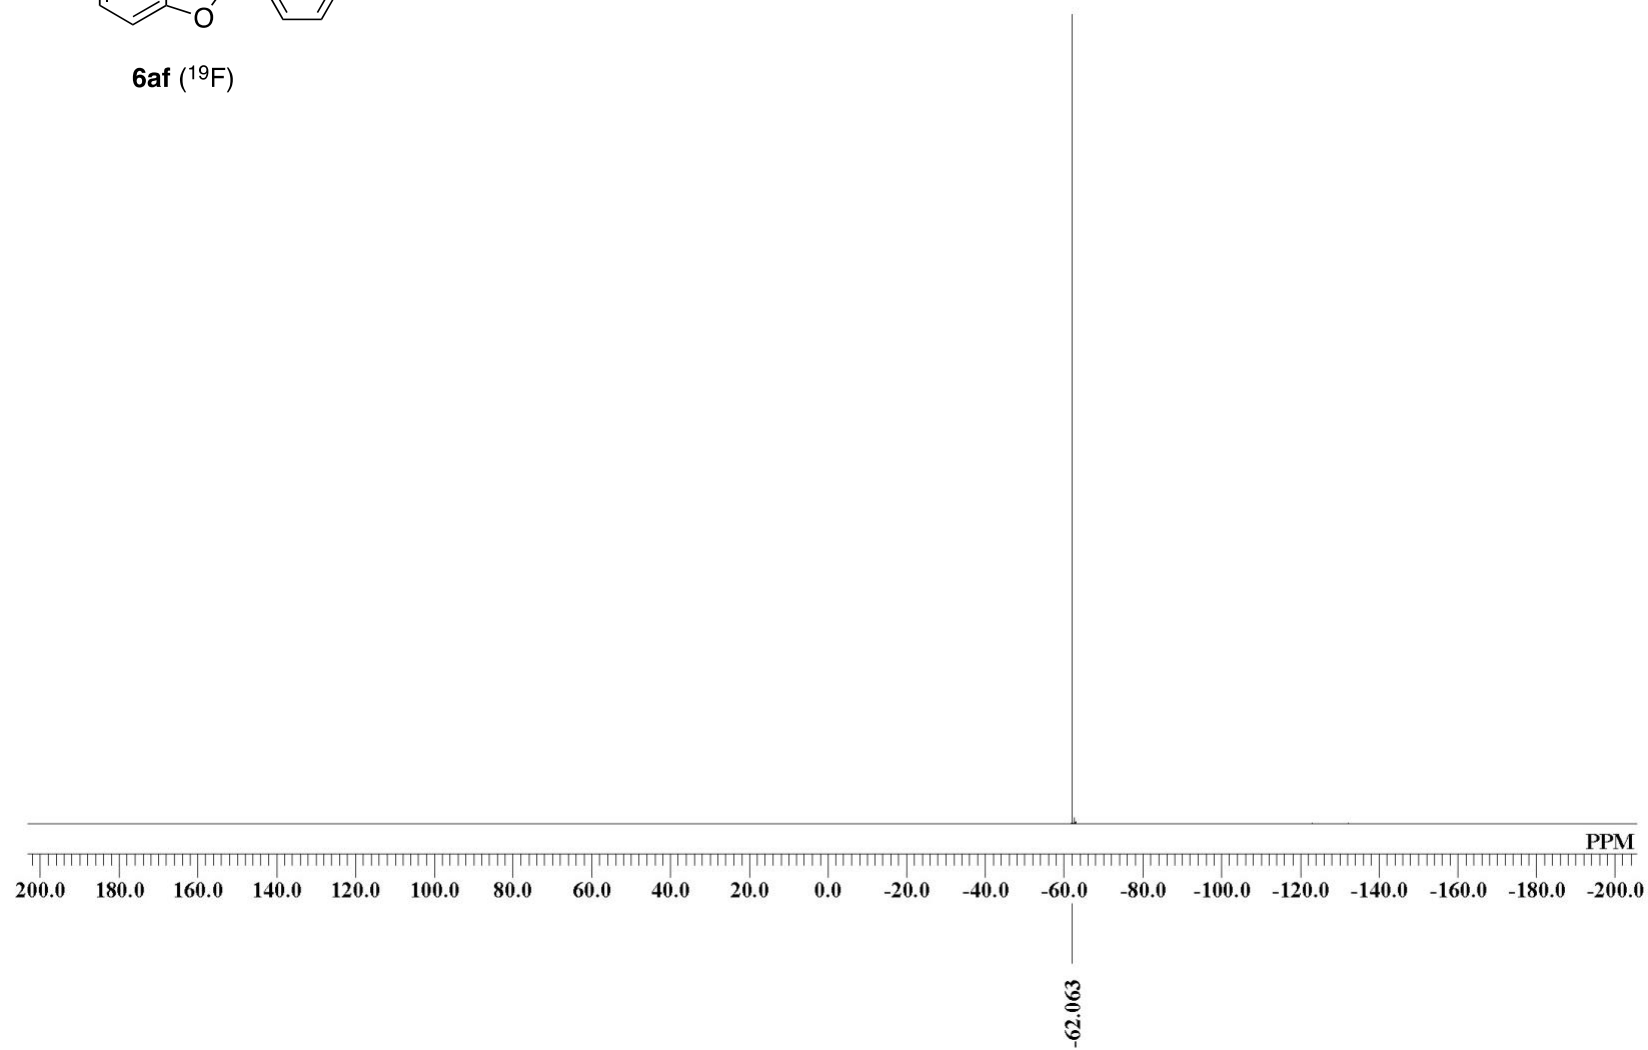

6KO-194 Fr

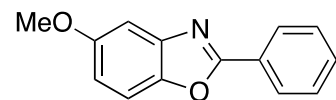

**6ag** ( $^1\text{H}$ )

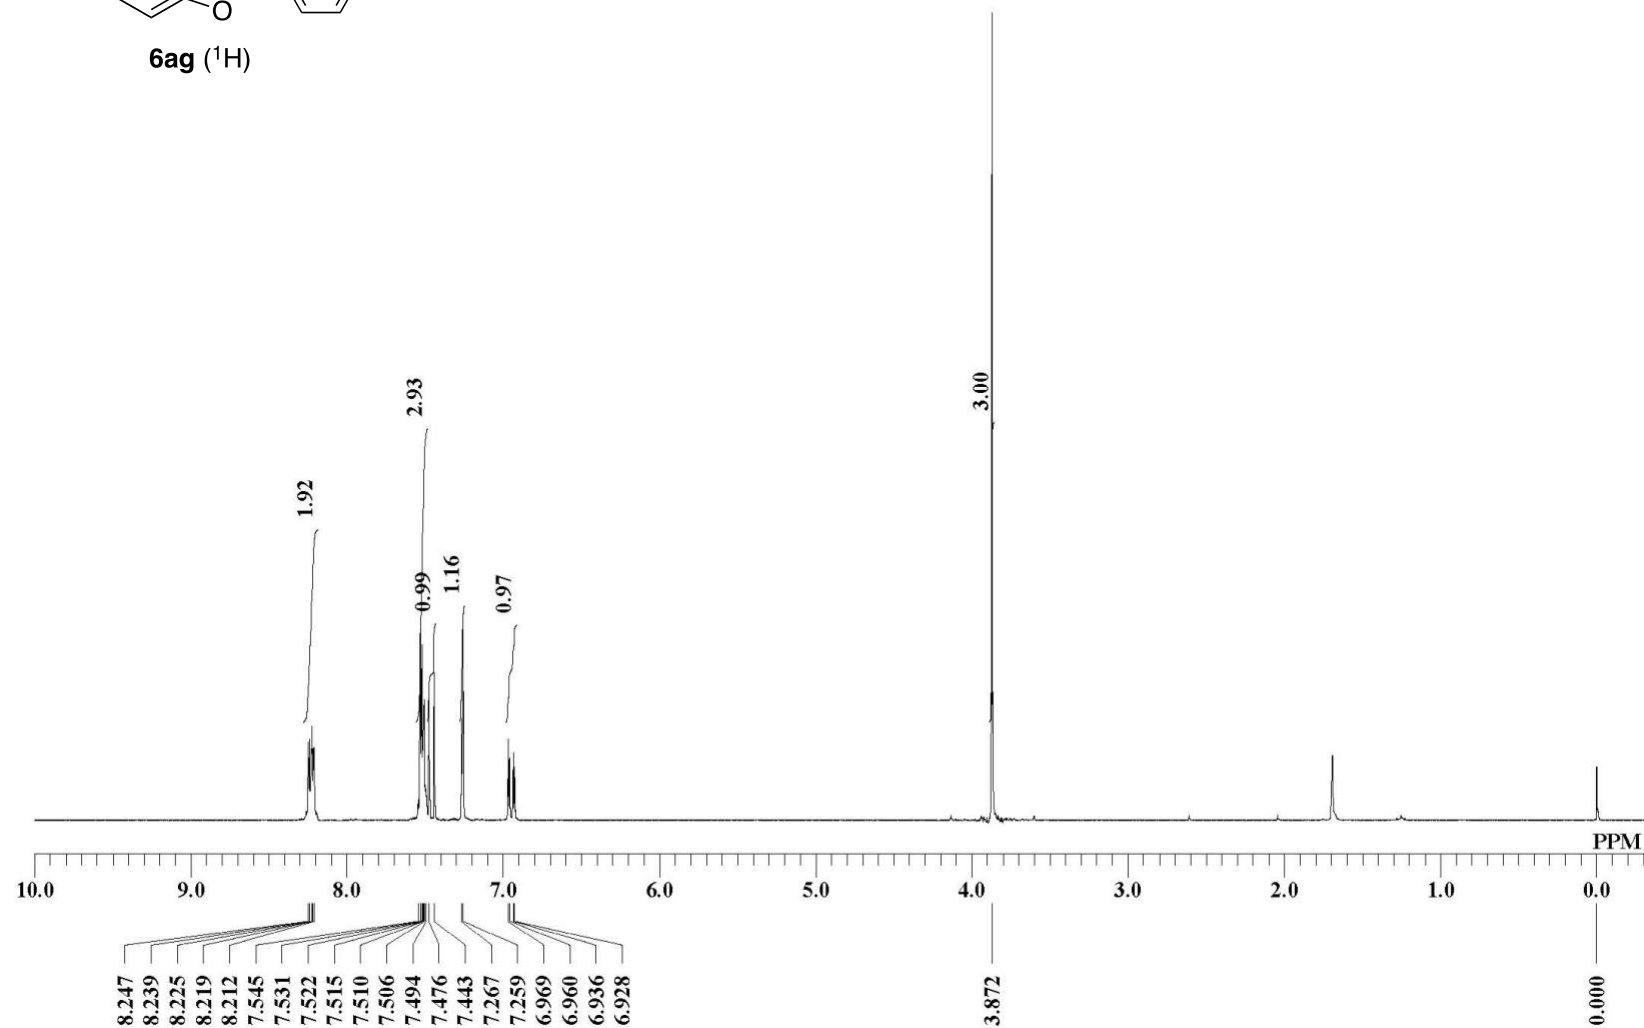

6KO-243 Fr

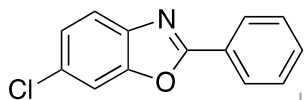

**6ah** ( $^1\text{H}$ )

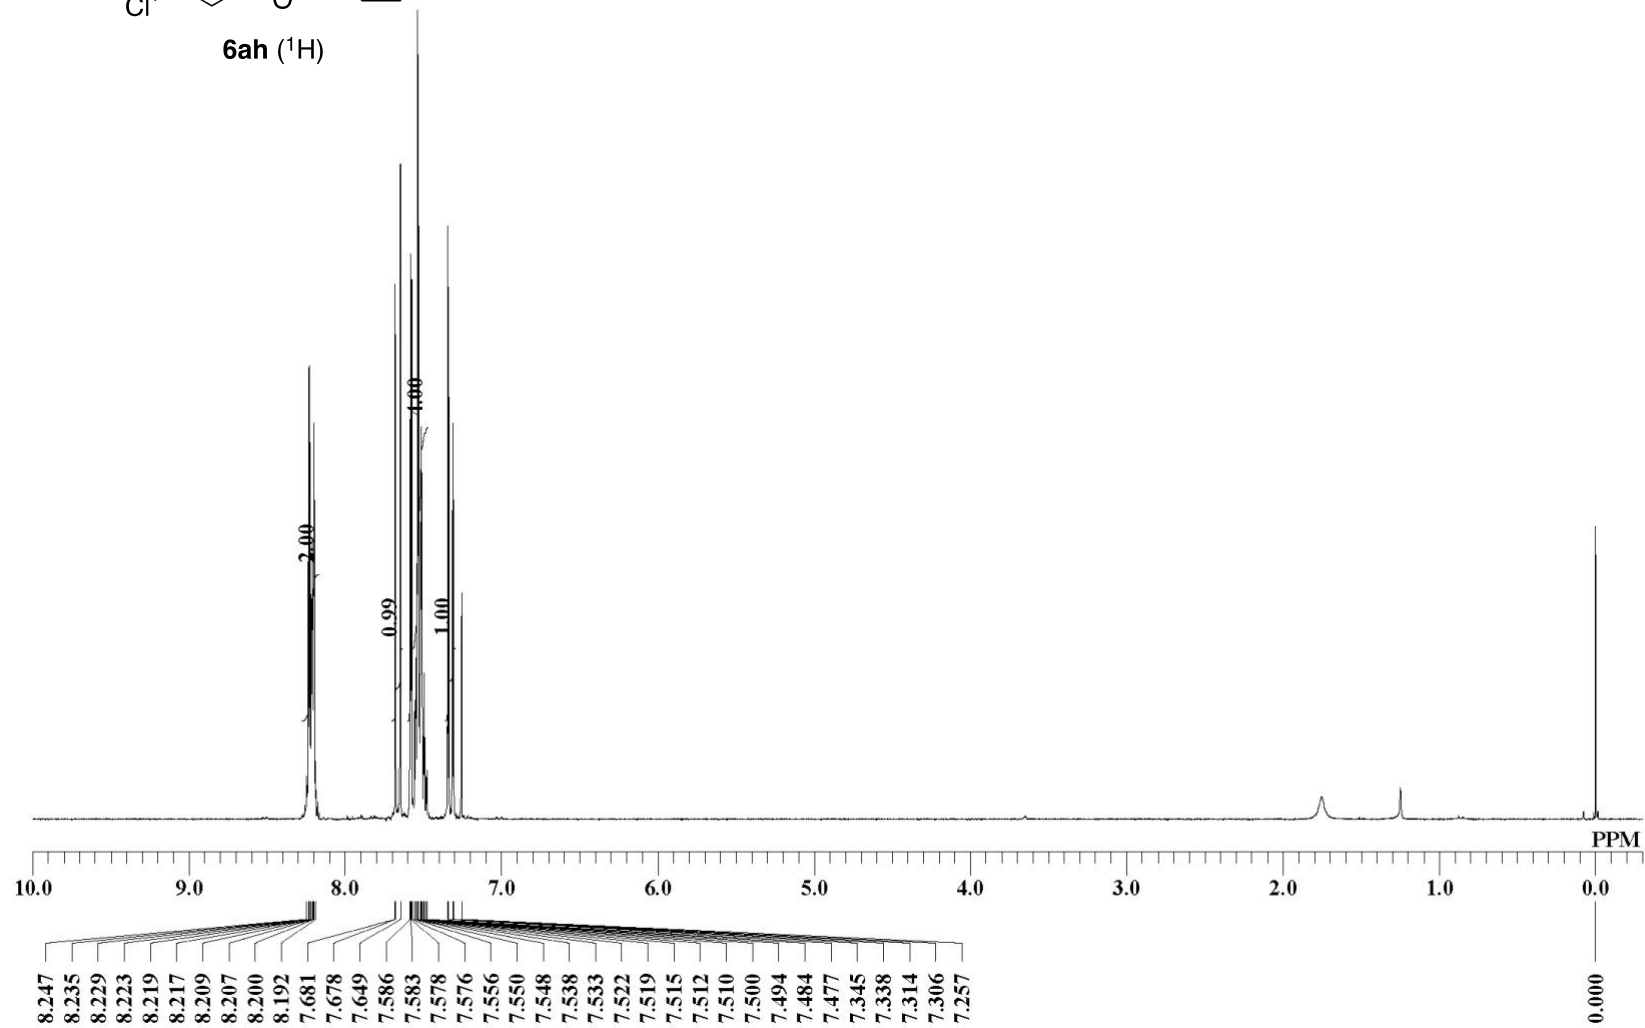

6KO-224 Fr

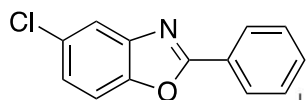

**6ai** ( $^1\text{H}$ )

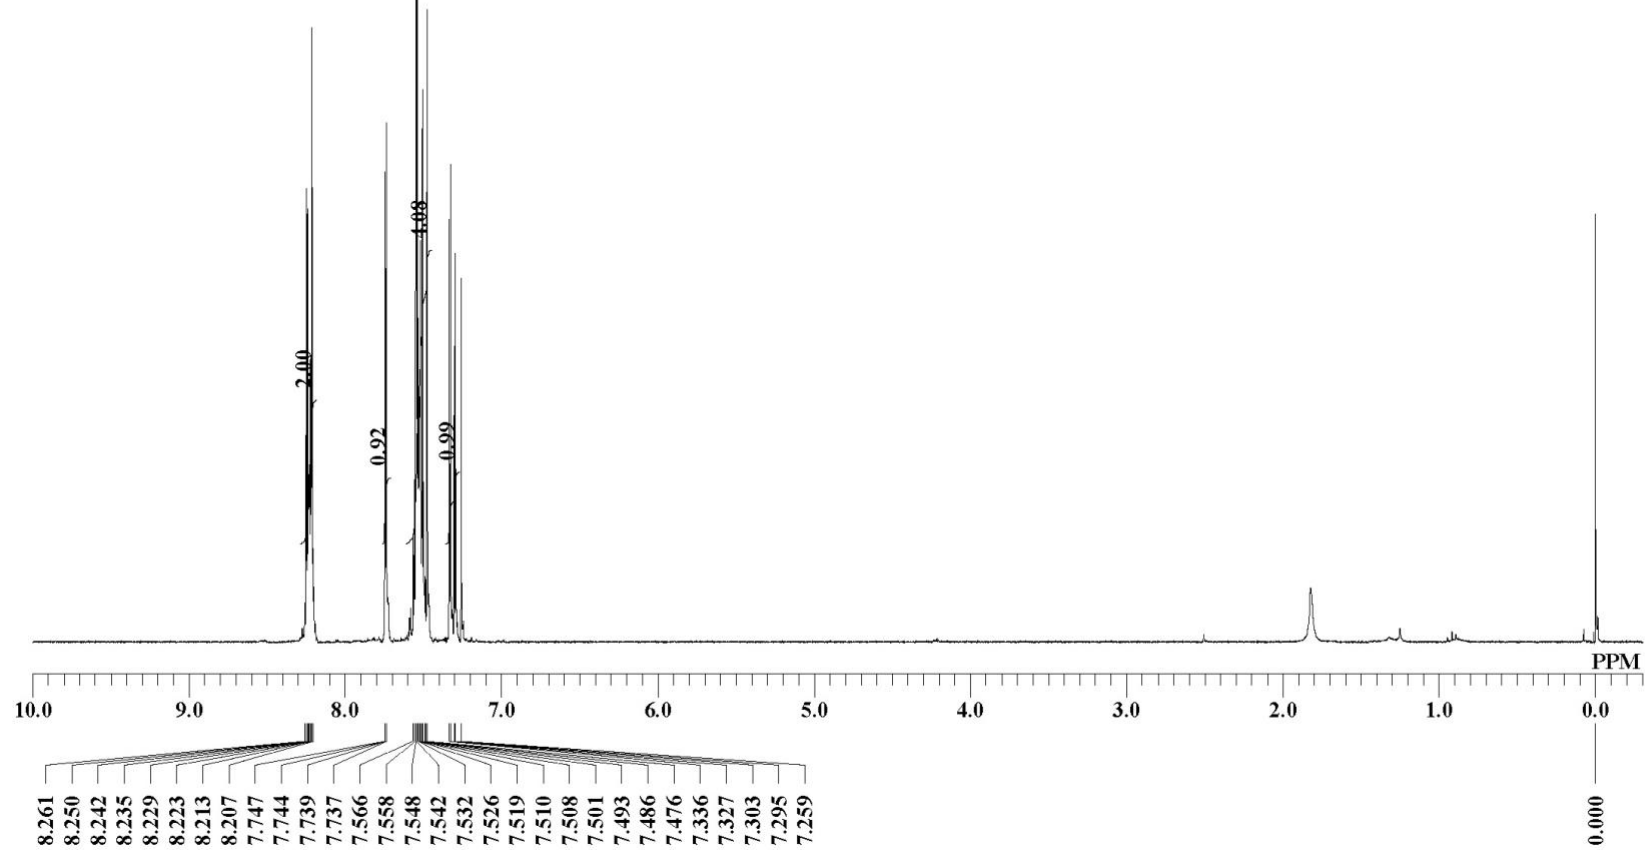

6KO-231.Fr

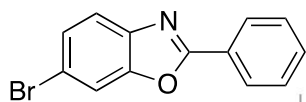

**6aj** ( $^1\text{H}$ )

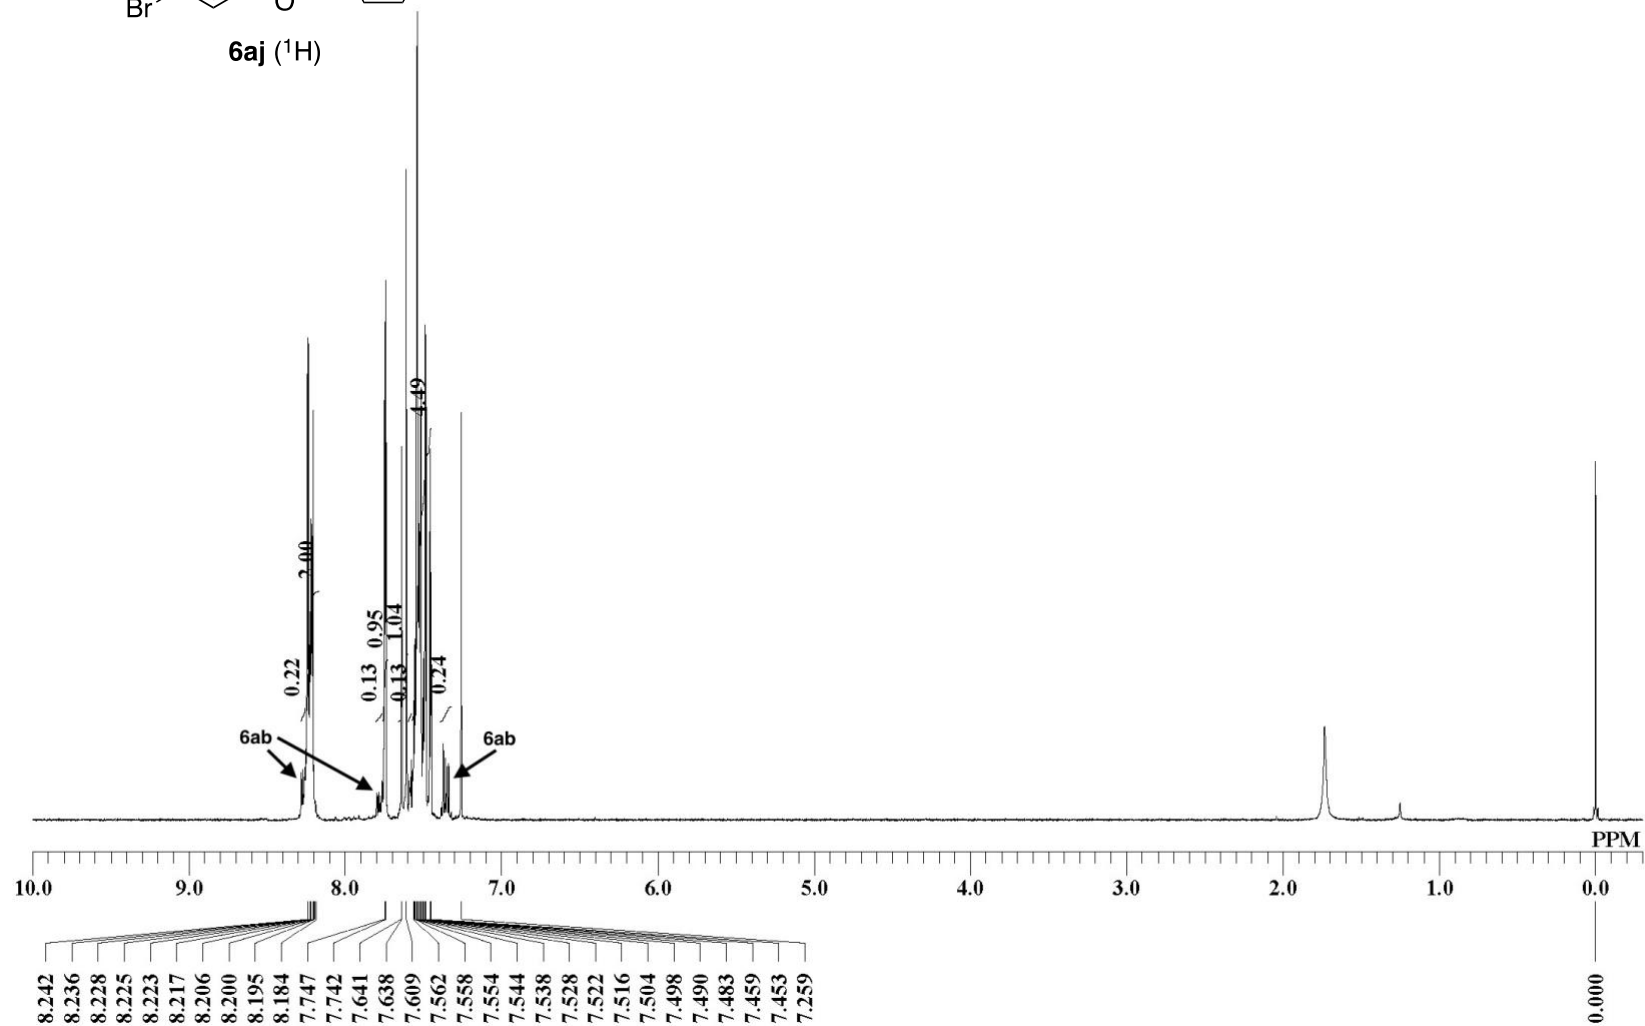

6KO-230 Fr1

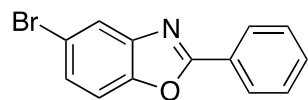

**6ak** (<sup>1</sup>H)

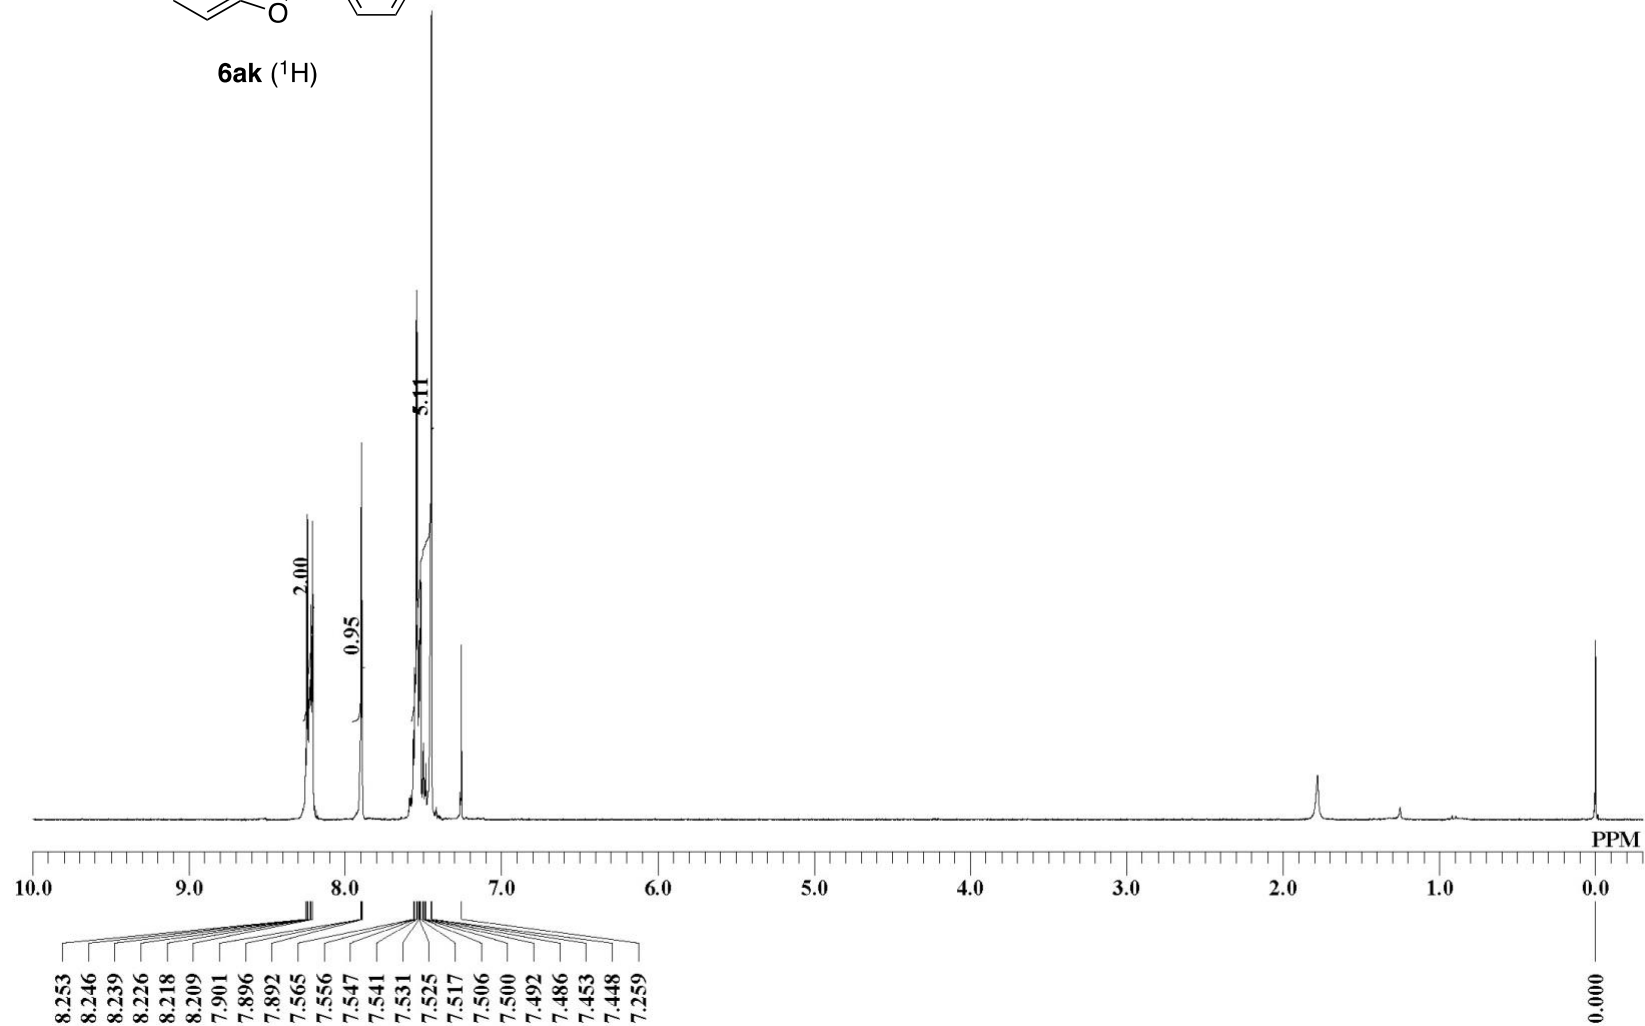

6KO-230 Fr 13C

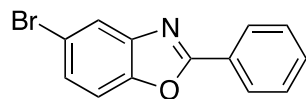

**6ak** ( $^{13}\text{C}$ )

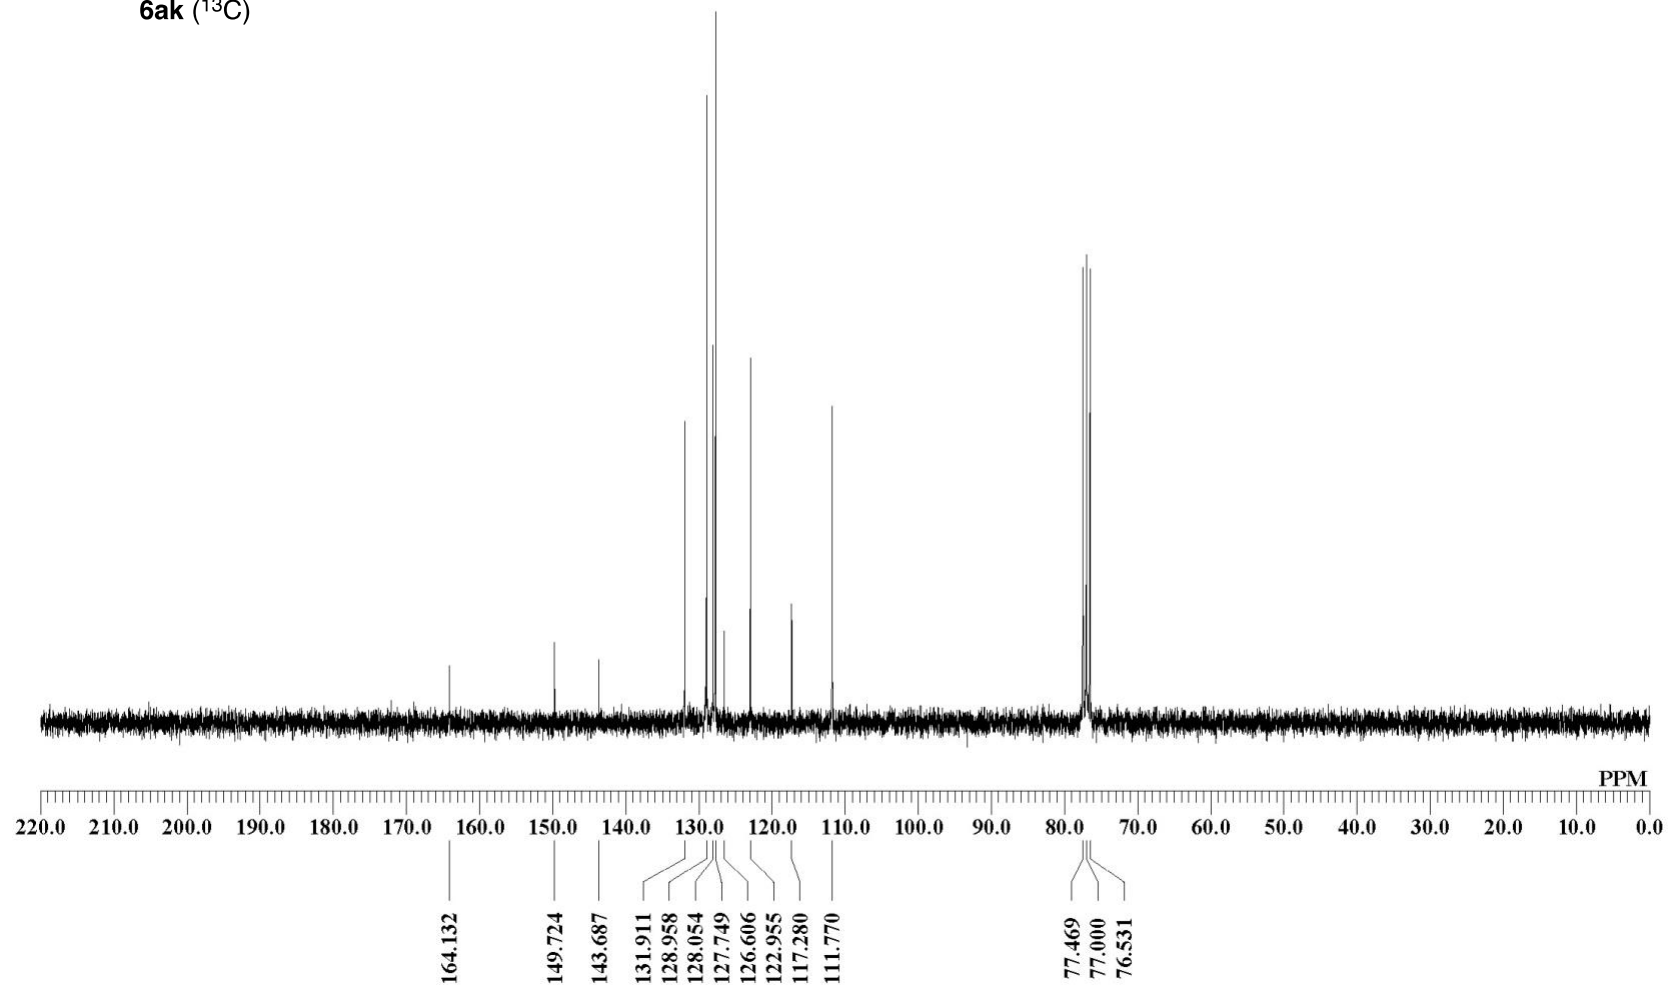

6KO-242 Fr1

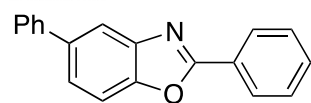

**6al** (<sup>1</sup>H)

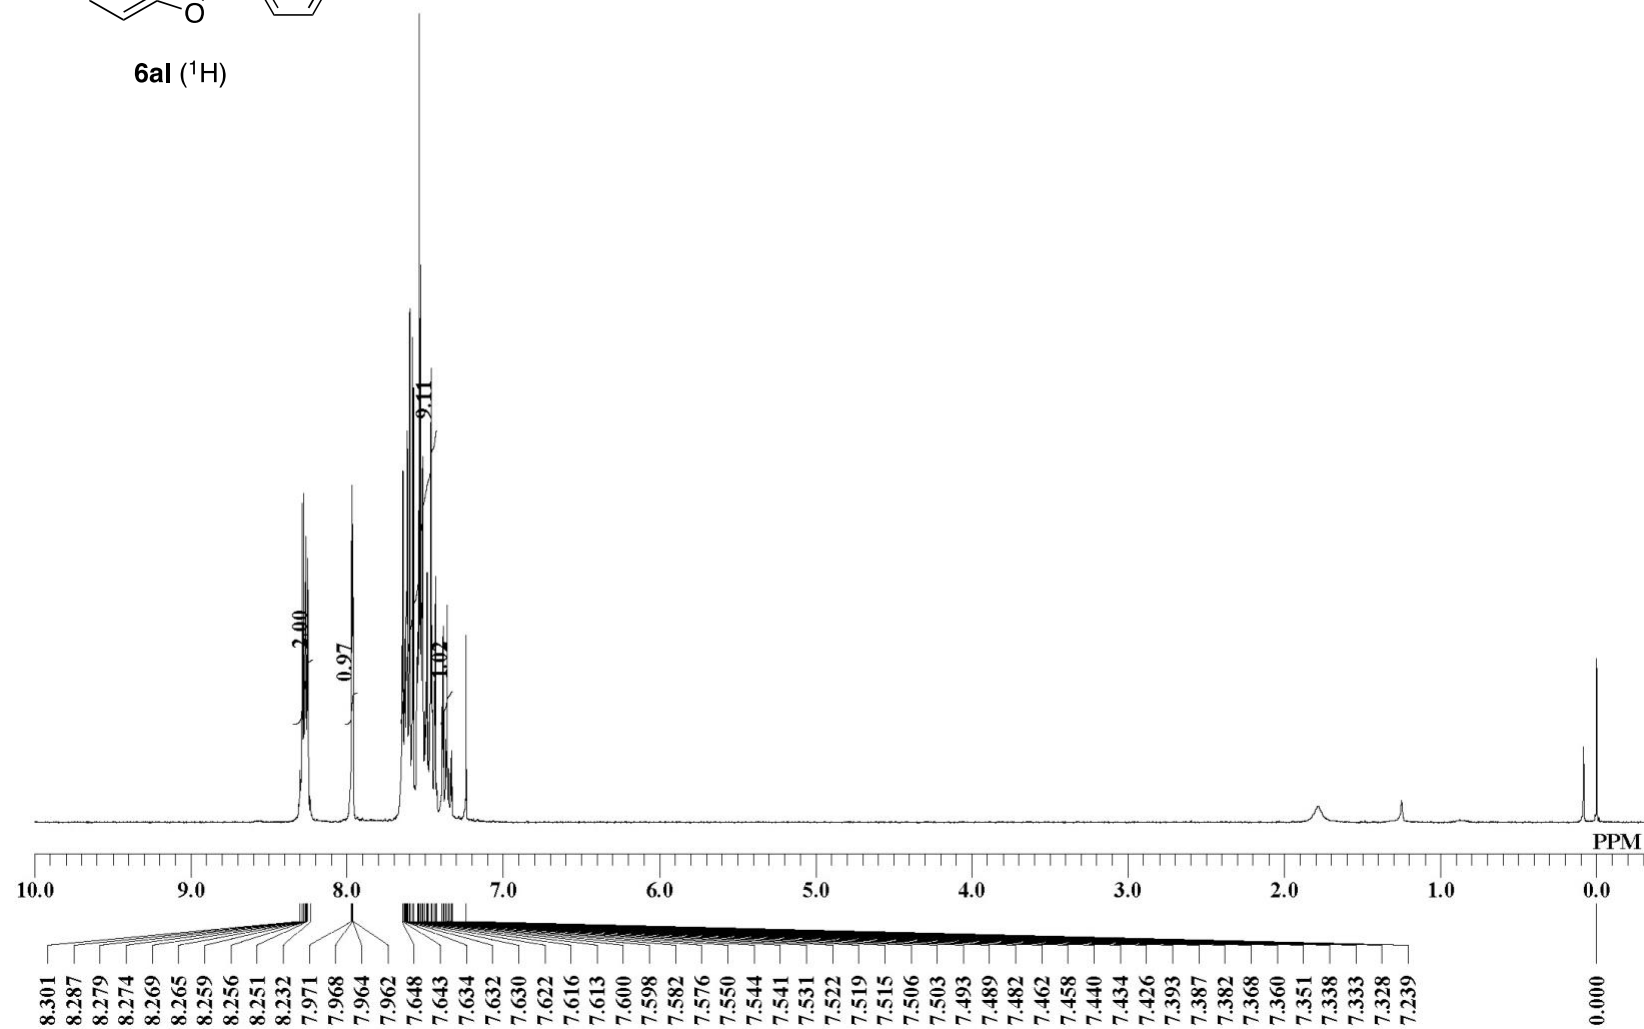

6KO-242 Fr 13C

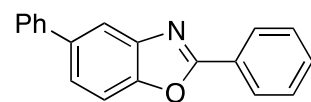

**6al** ( $^{13}\text{C}$ )

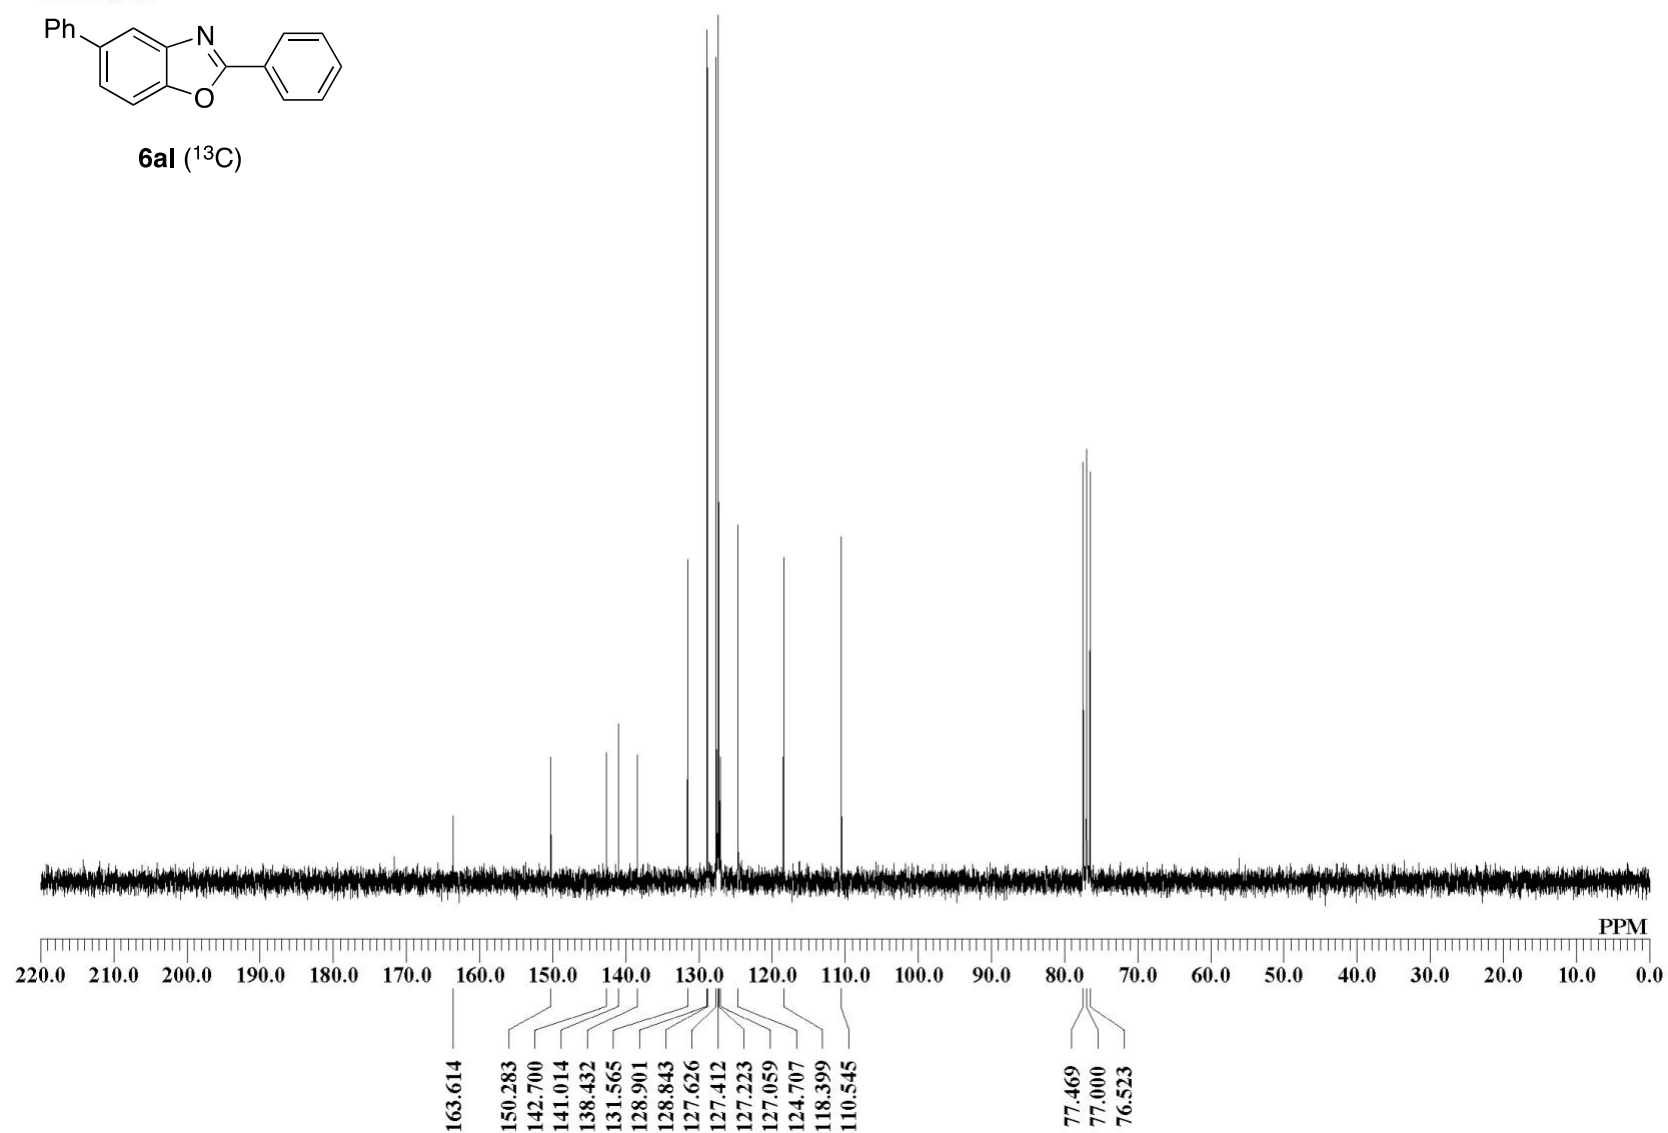

6KO-276 Fr

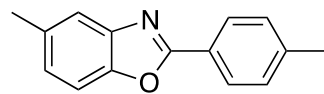

**6ba** ( $^1\text{H}$ )

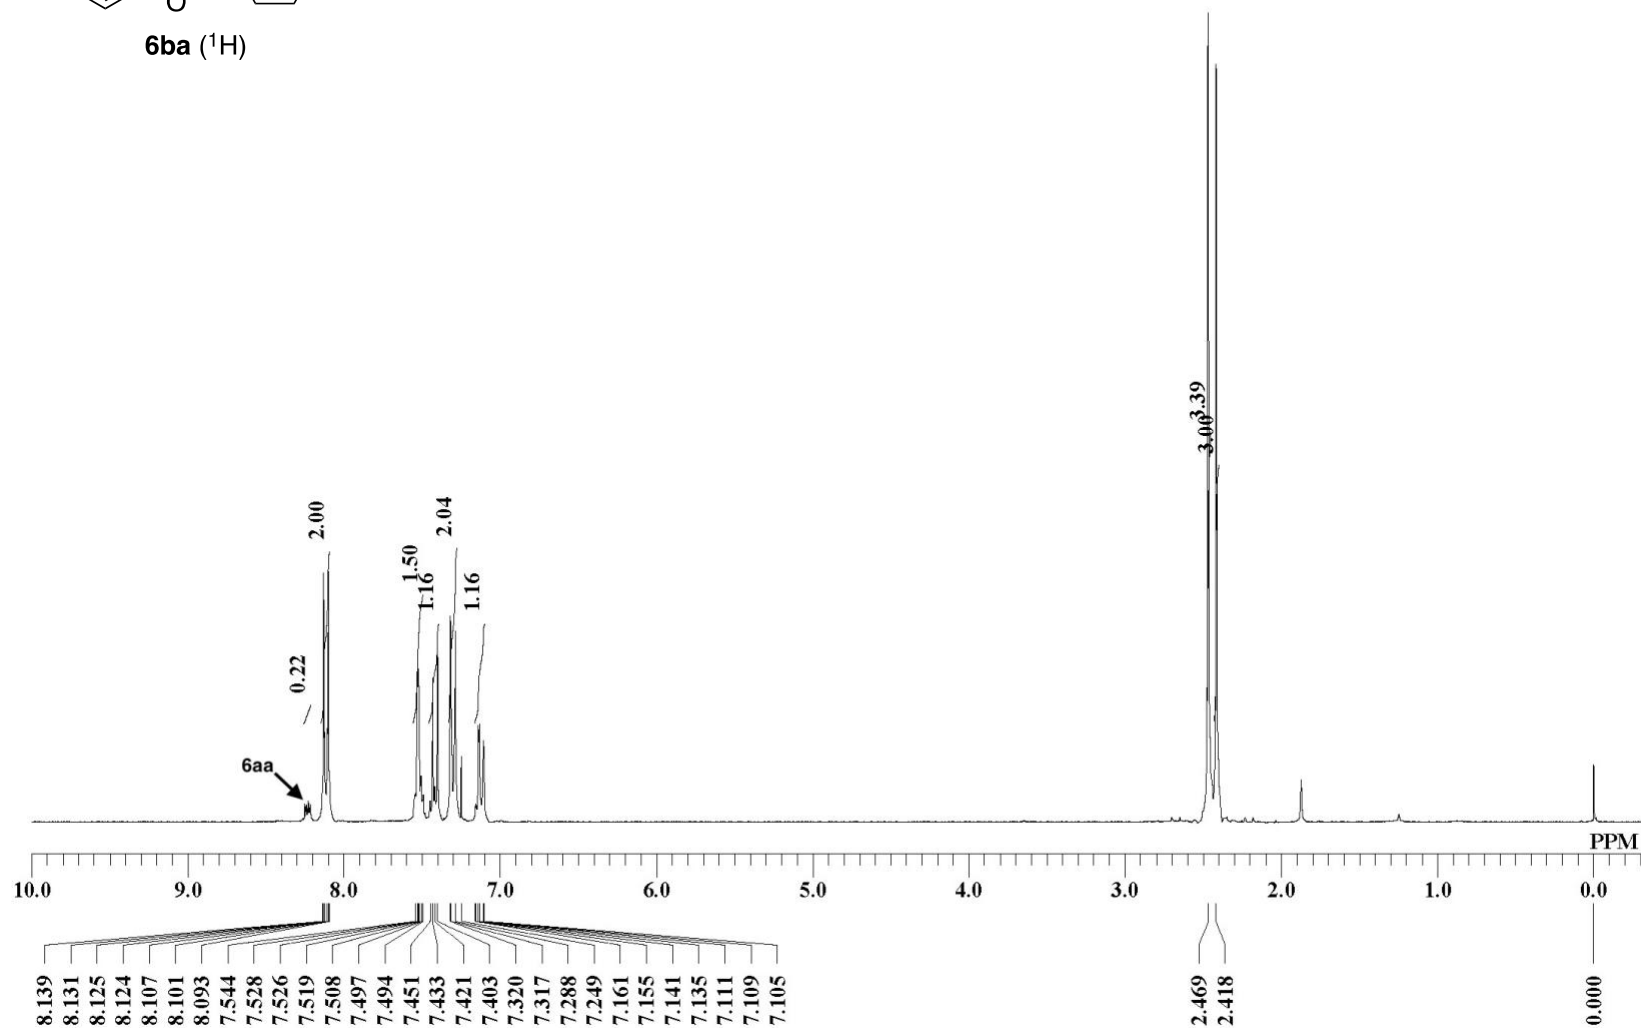

6KO-272 Fr

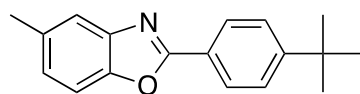

**6ca** ( $^1\text{H}$ )

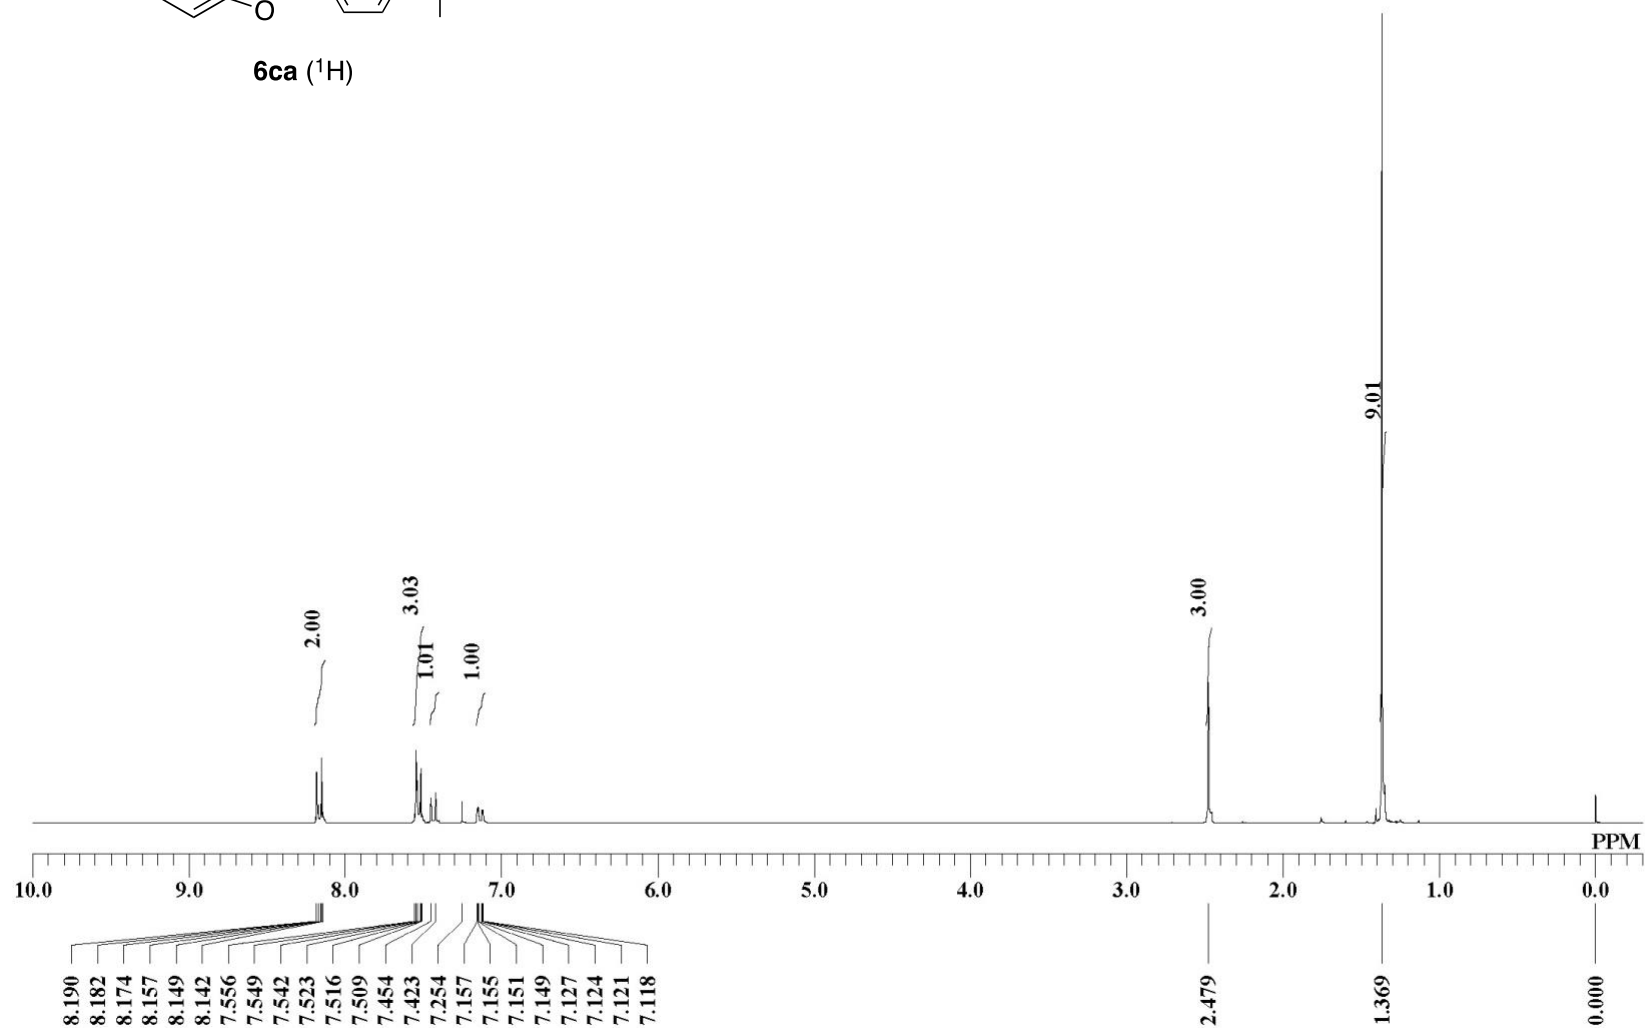

6KO-272 Fr  $^{13}\text{C}$

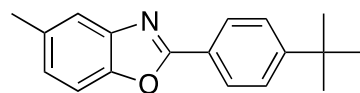

**6ca** ( $^{13}\text{C}$ )

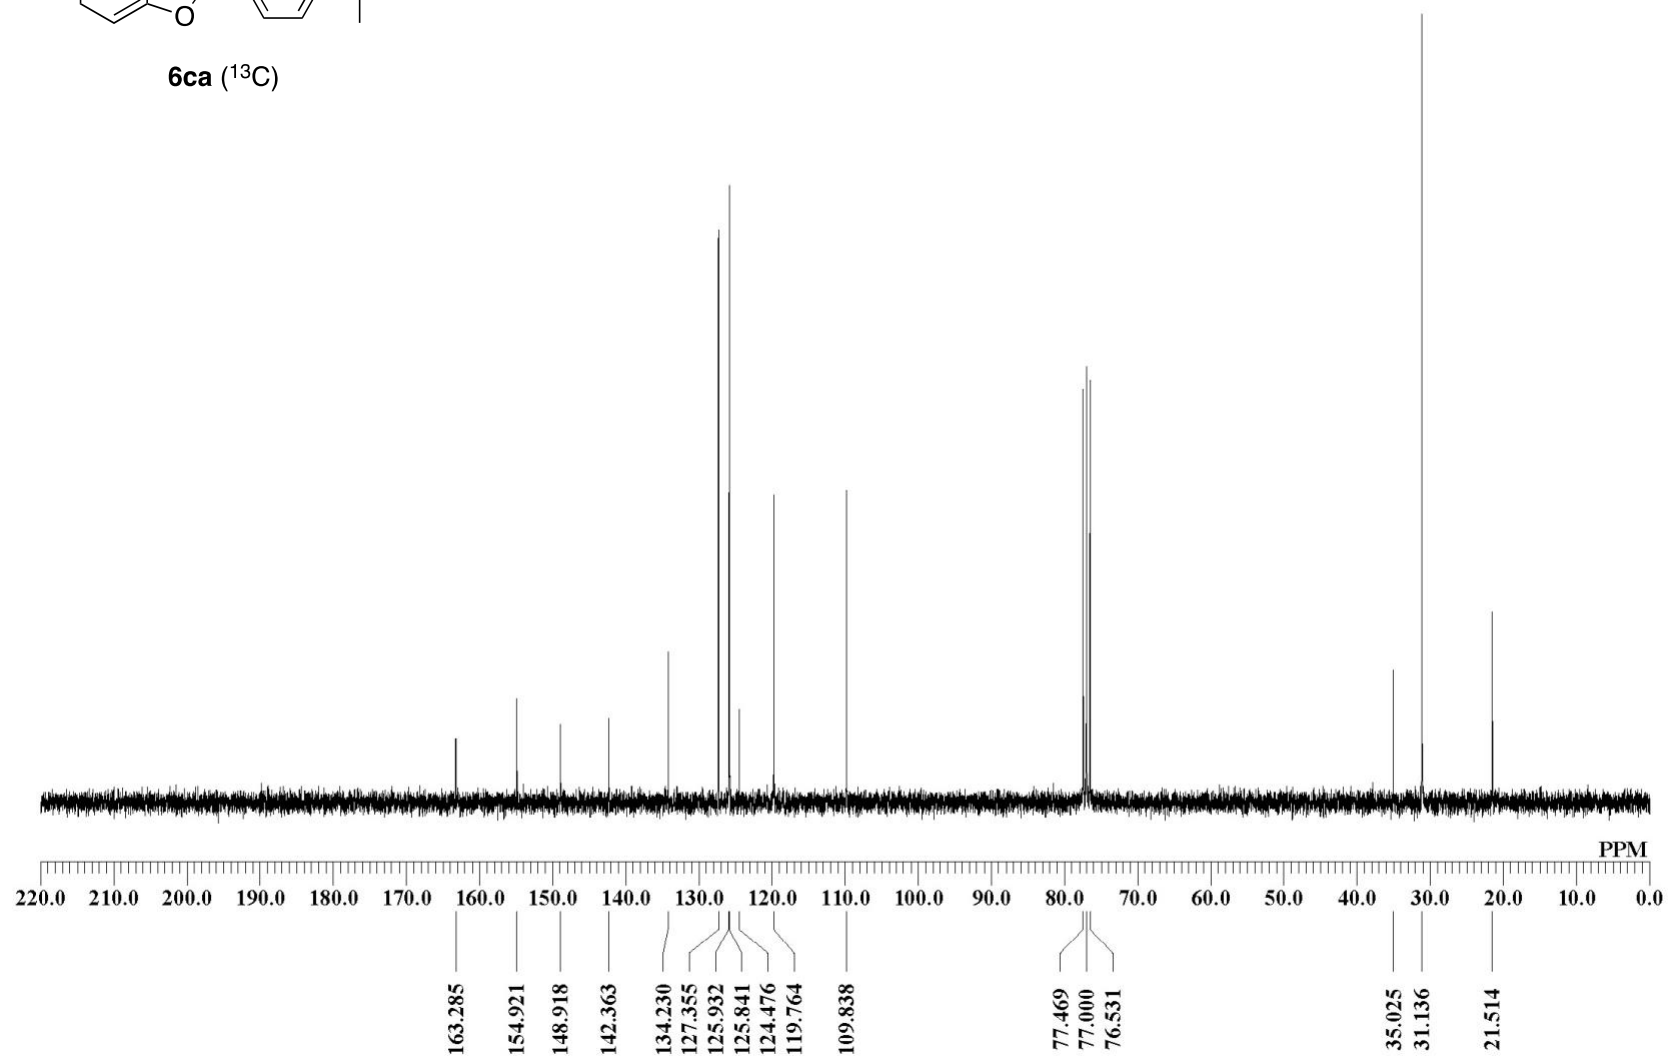

6KO-256 Fr

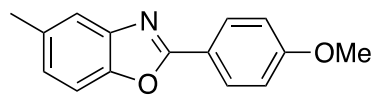

**6da** ( $^1\text{H}$ )

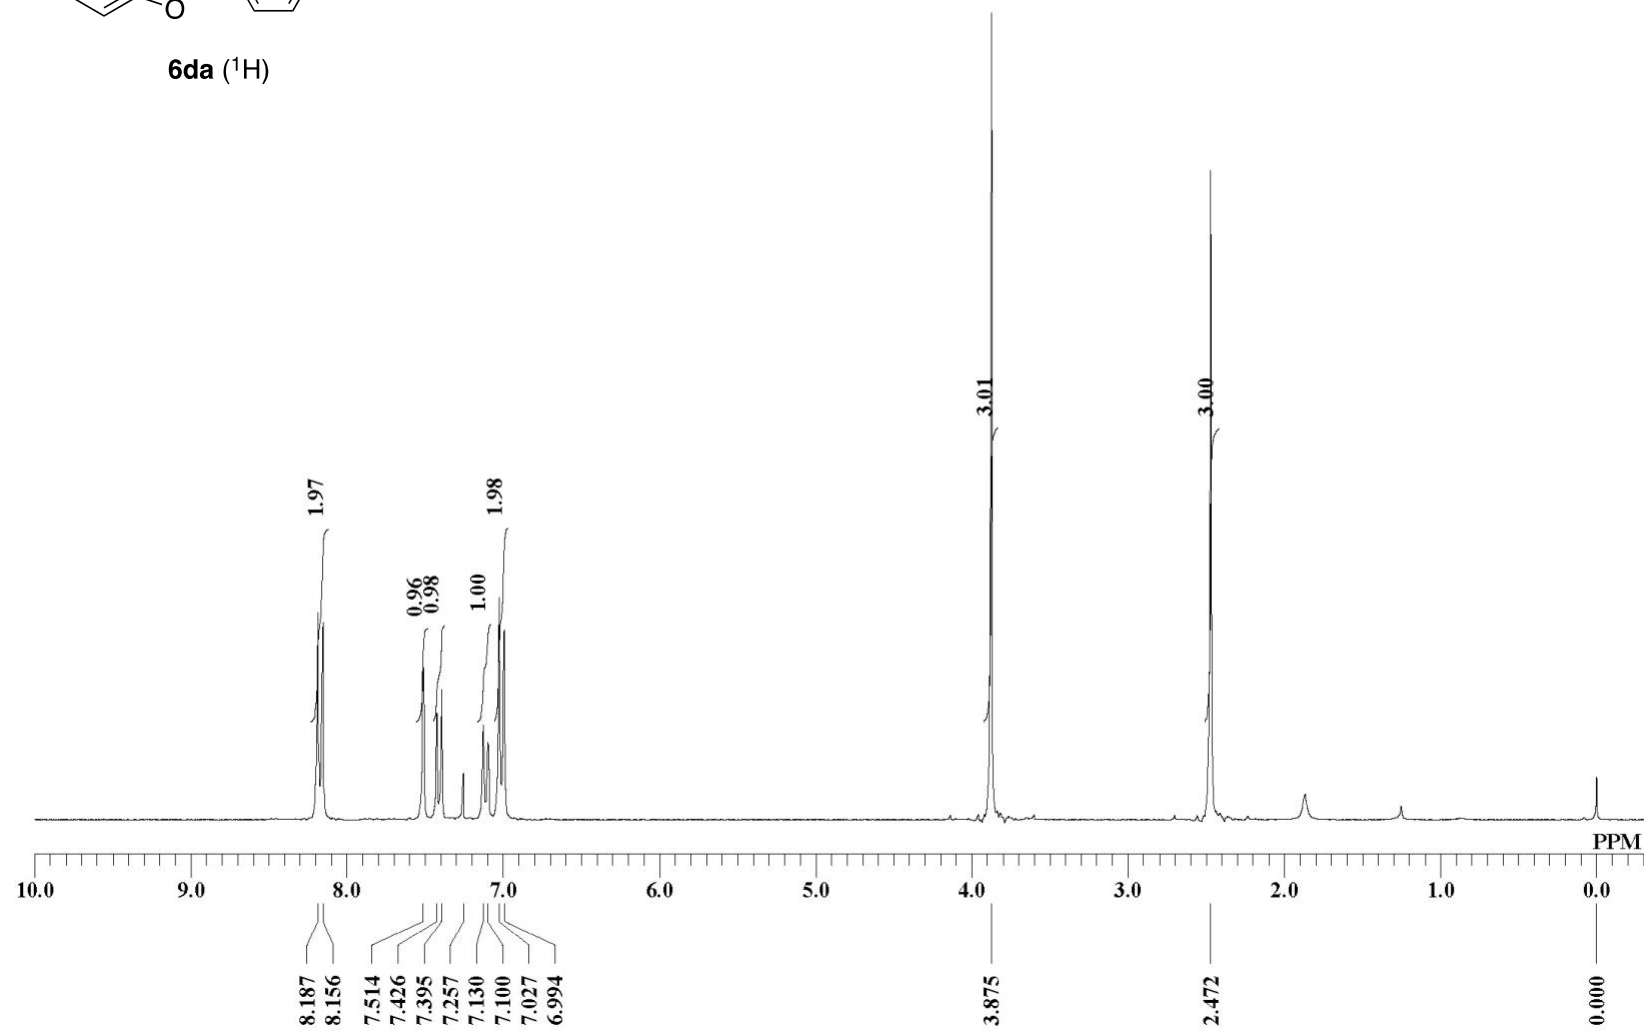

6KO-256 Fr 13C3

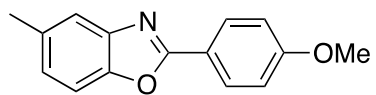

**6da** ( $^{13}\text{C}$ )

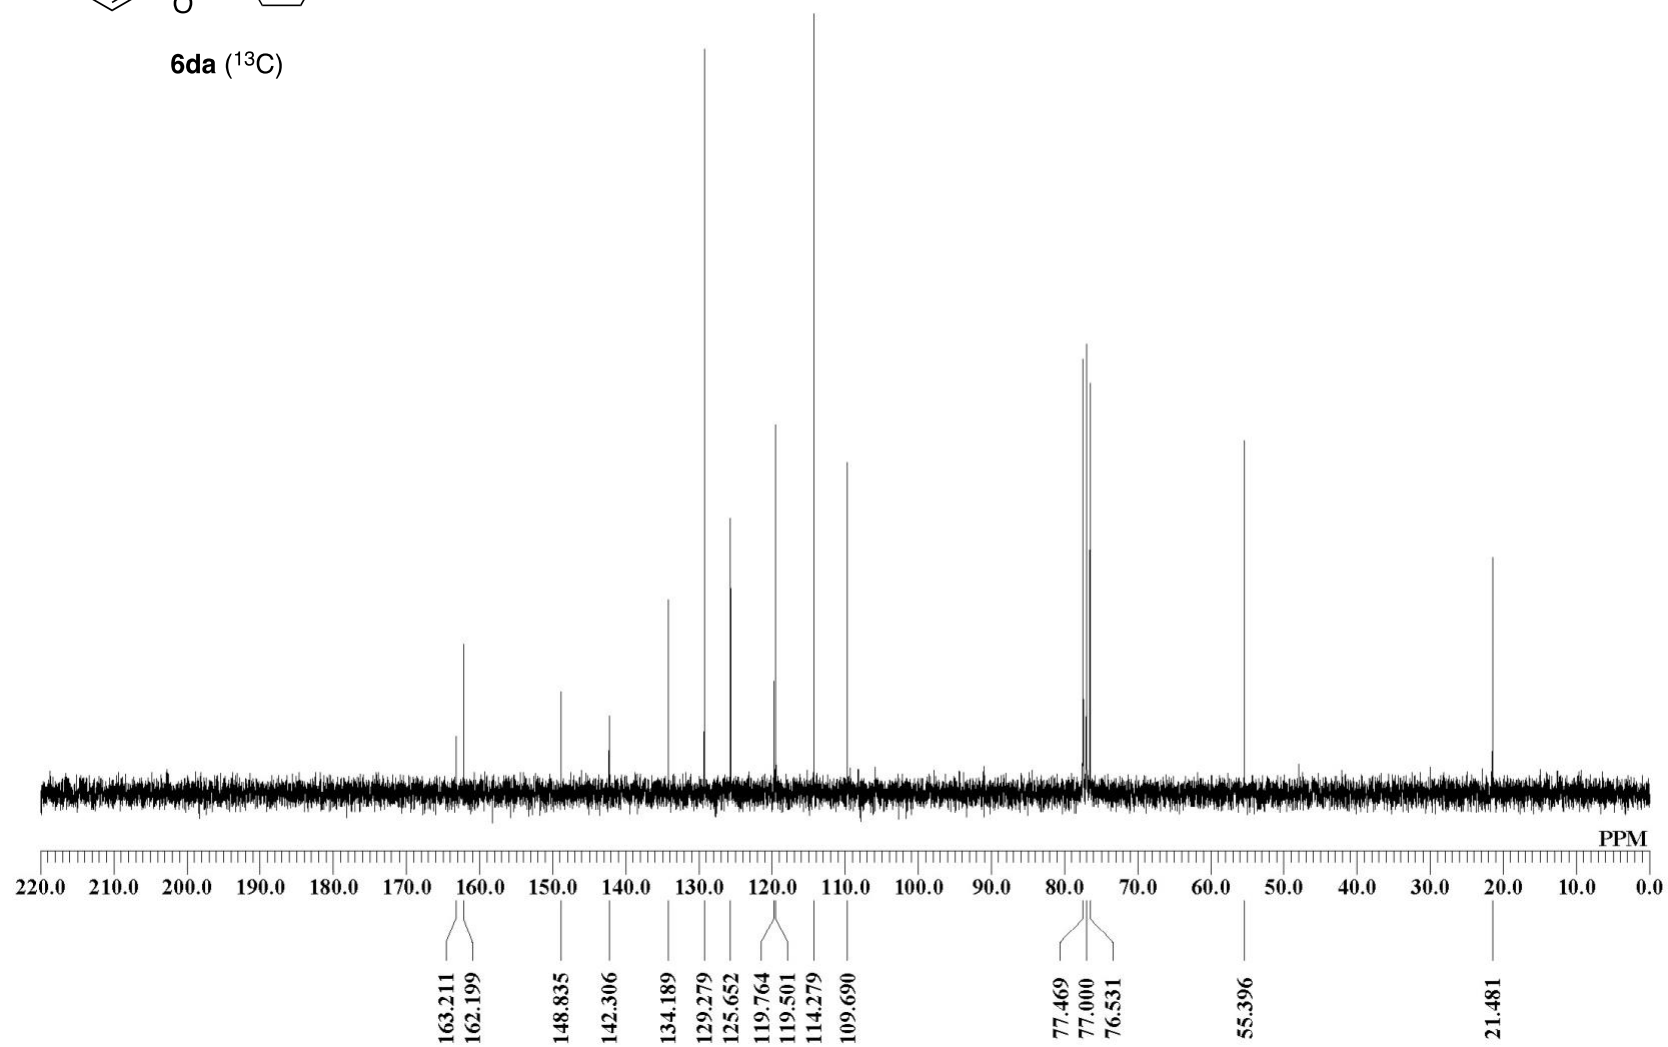

6KO-267 Fr

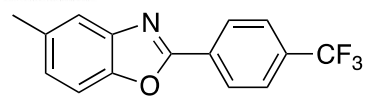

**6ea** (<sup>1</sup>H)

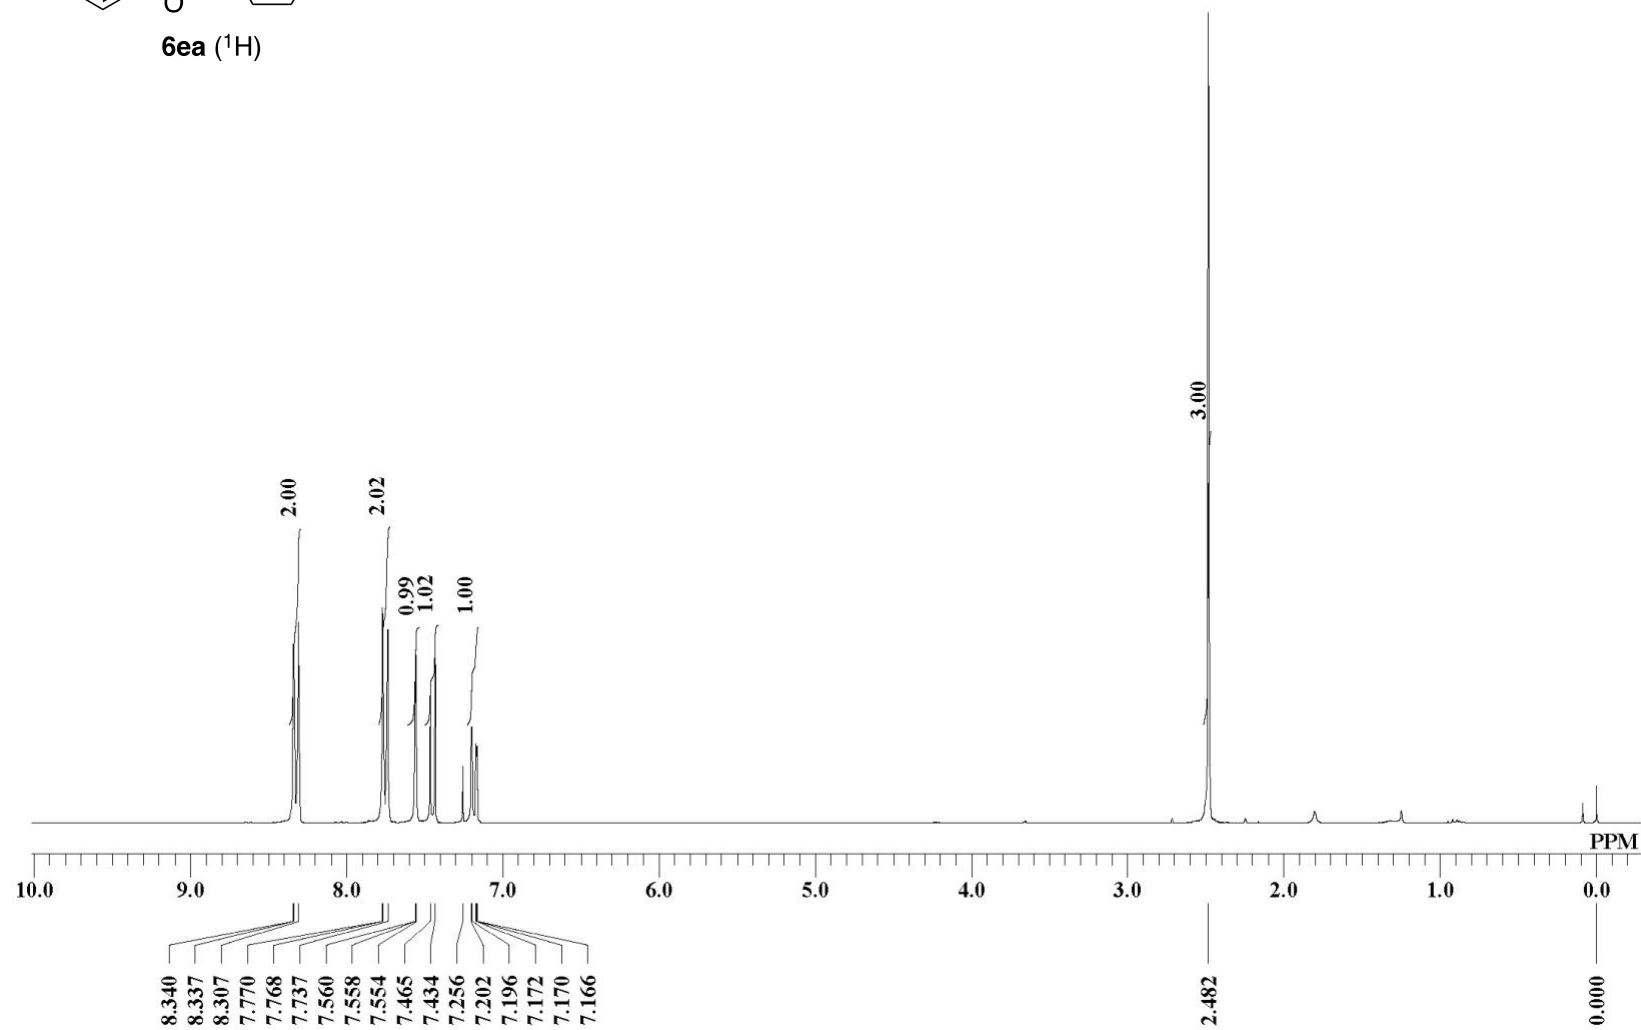

6KO-270 Fr

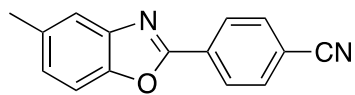

**6fa** ( $^1\text{H}$ )

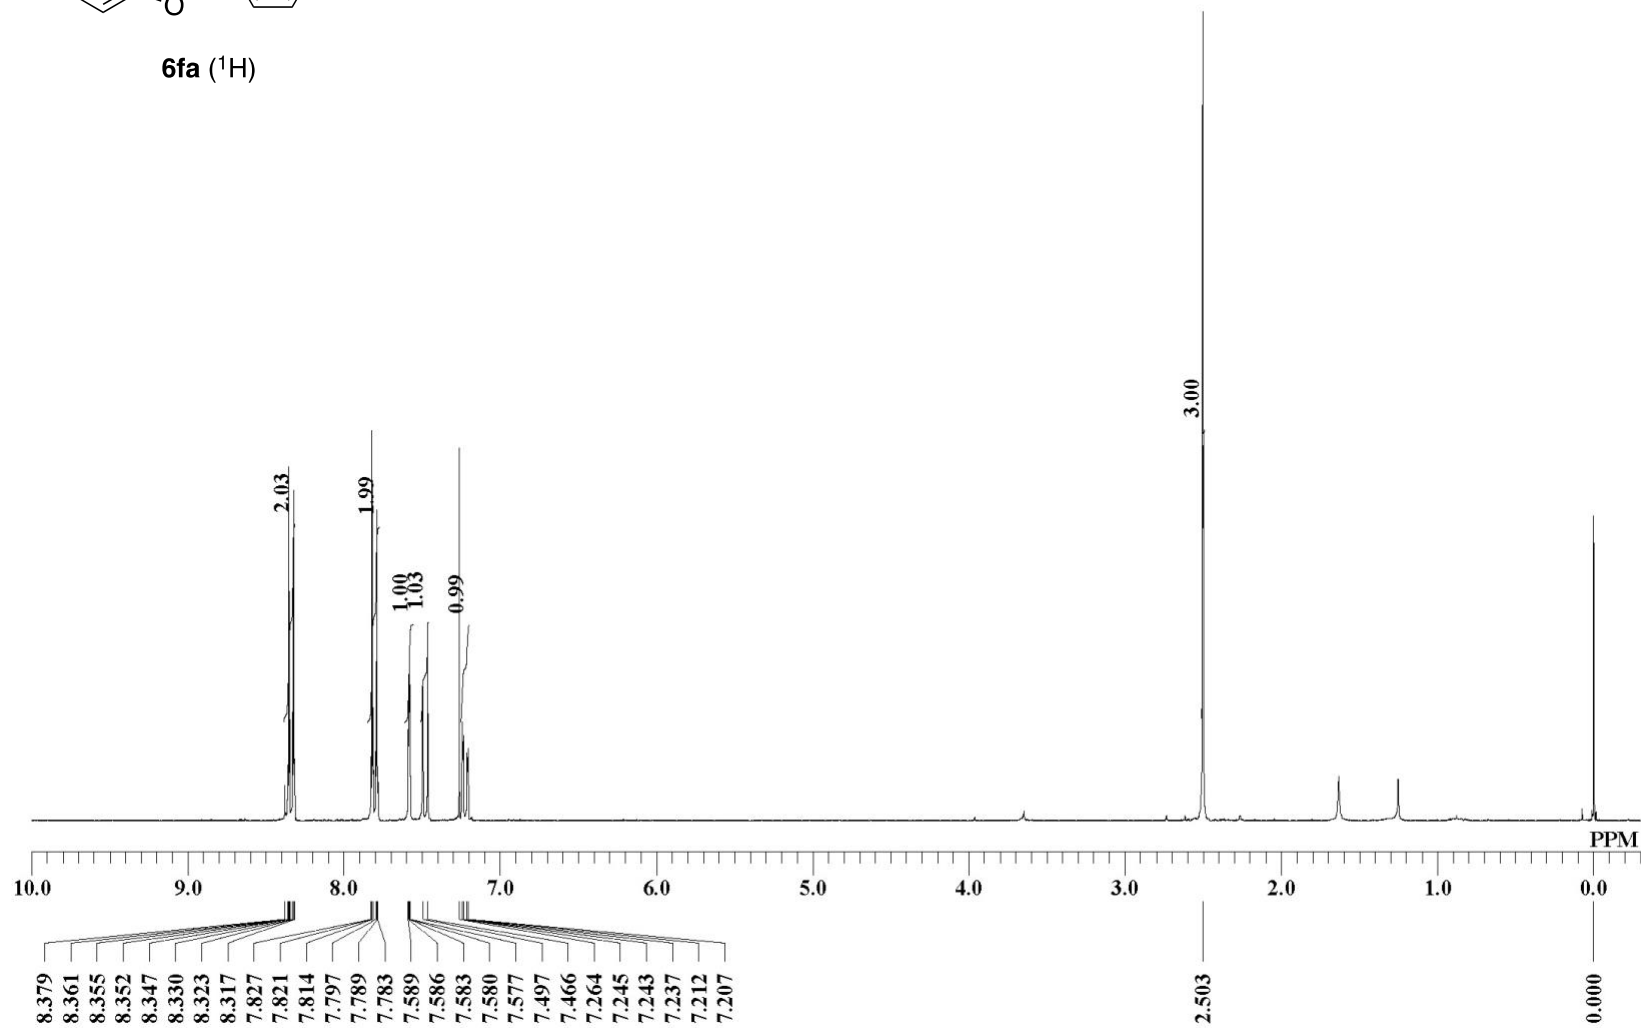

6KO-270 Fr  $^{13}\text{C}$

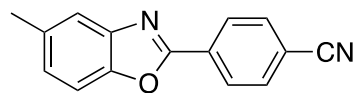

**6fa** ( $^{13}\text{C}$ )

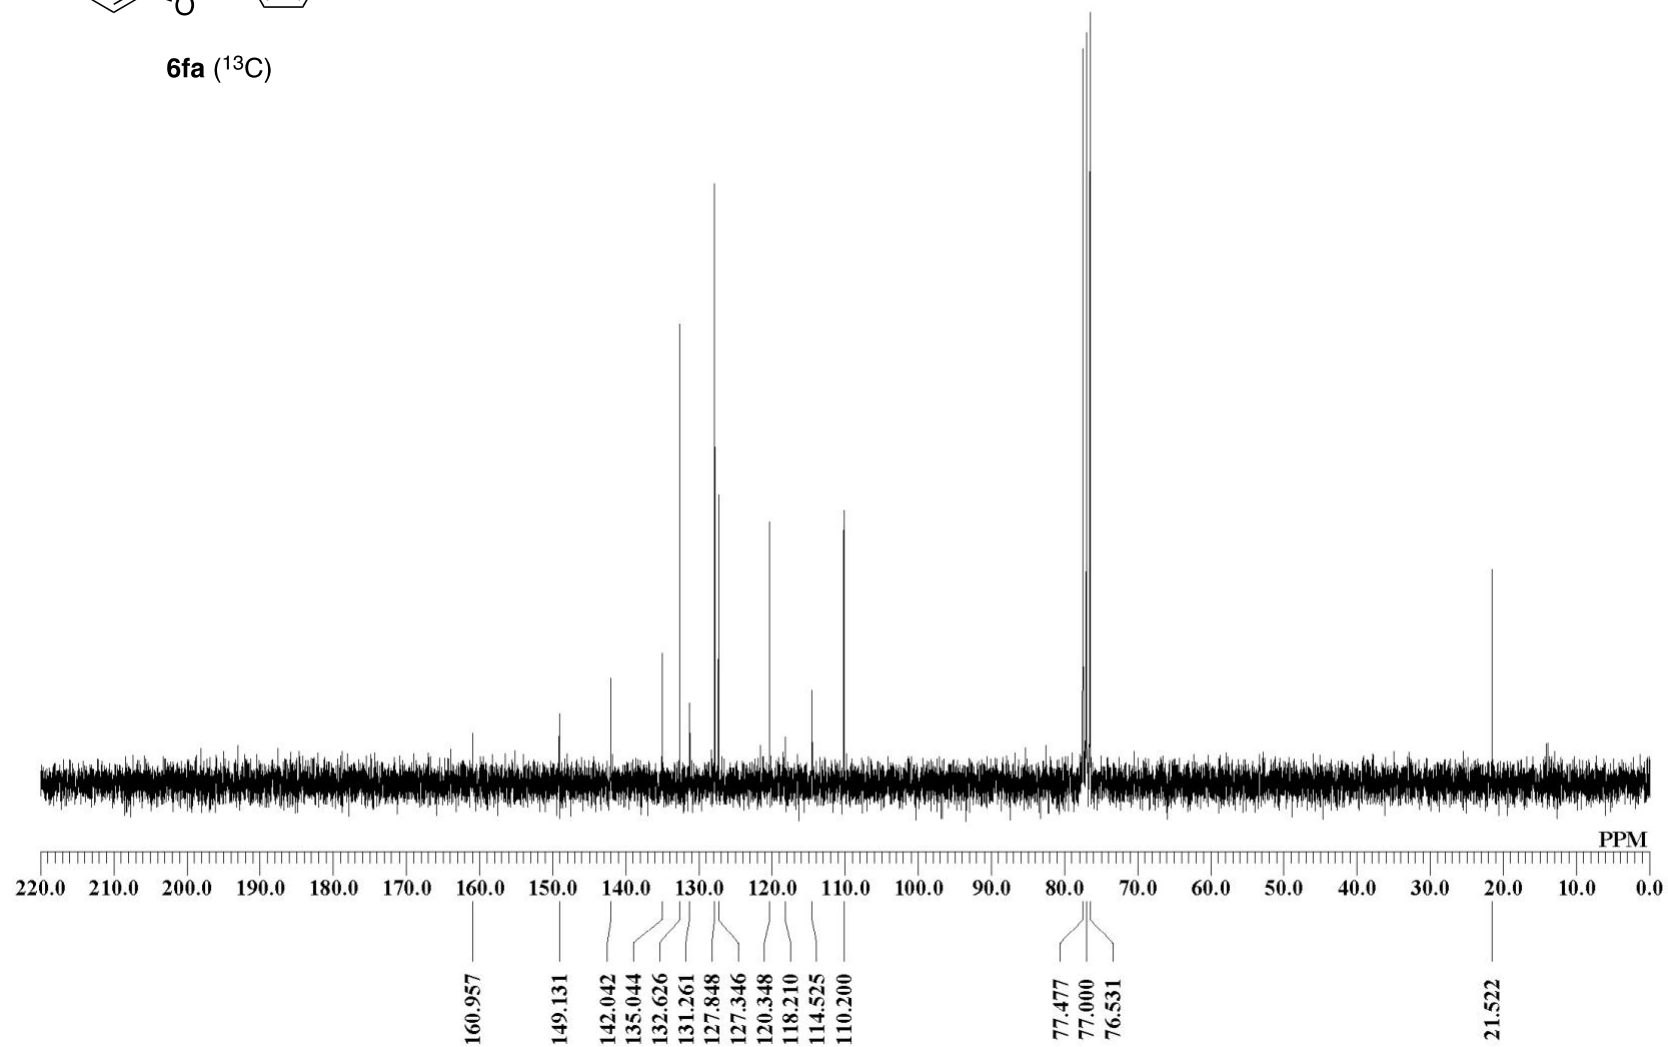

6KO-269 Fr

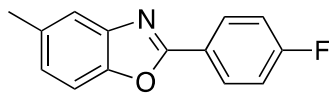

**6ga** ( $^1\text{H}$ )

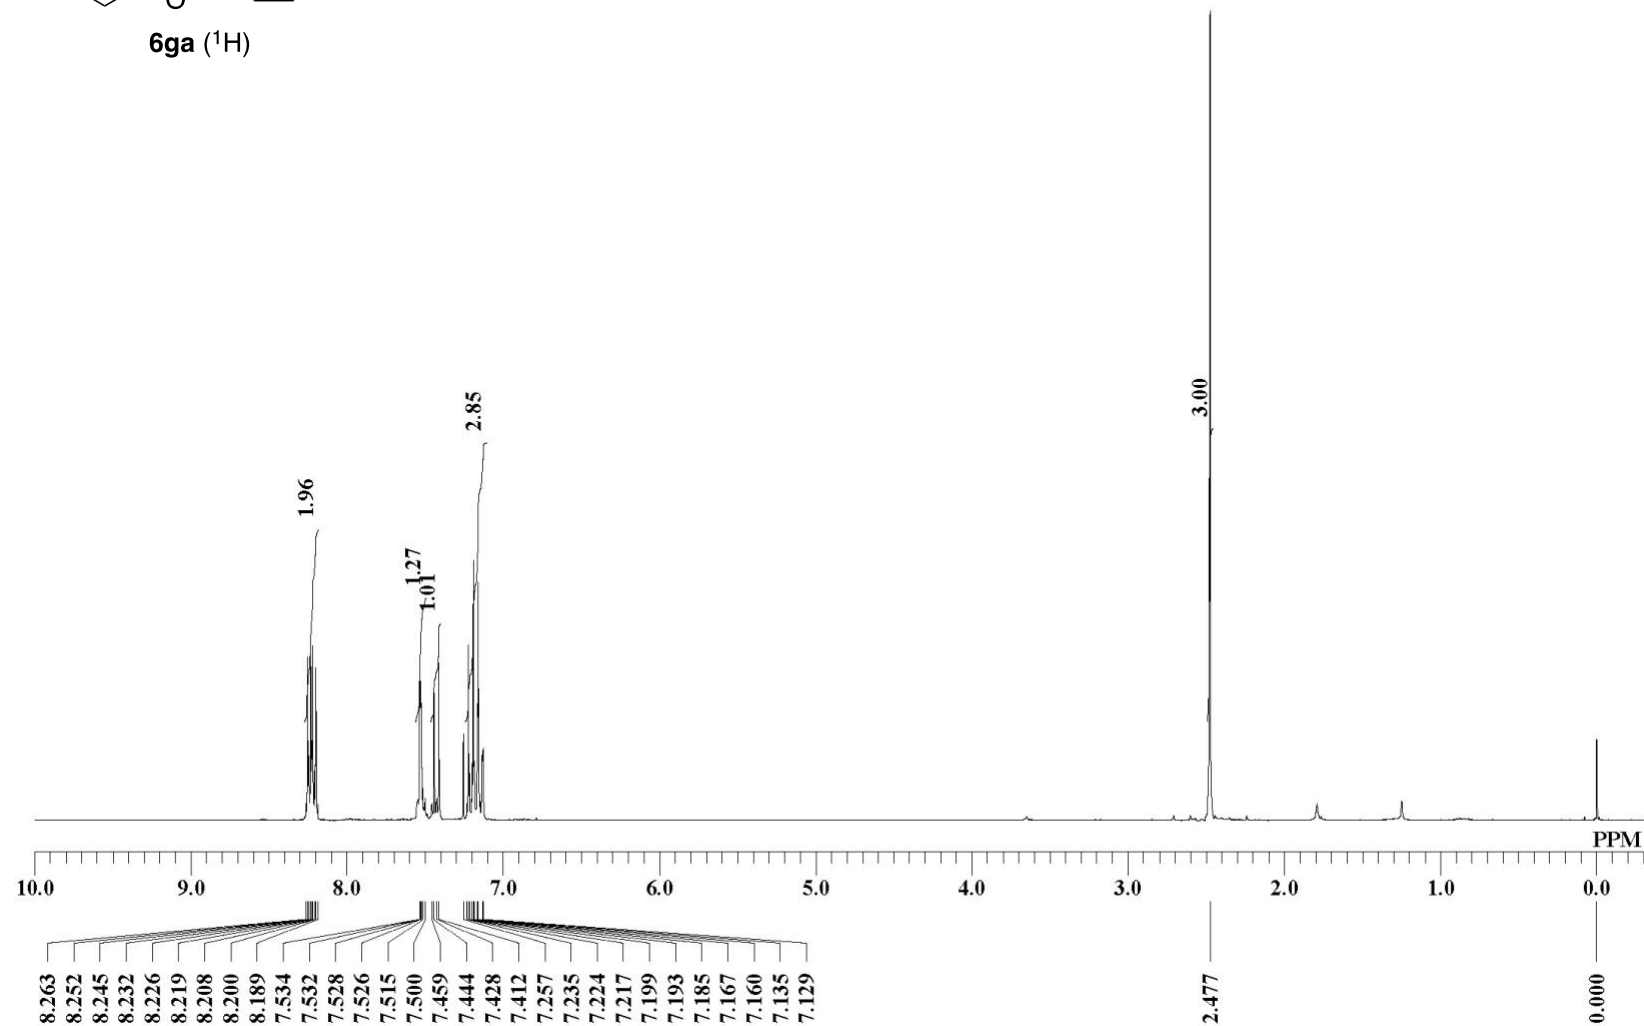

6KO-271 Fr

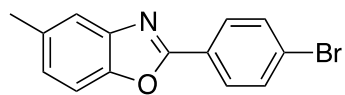

**6ha** ( $^1\text{H}$ )

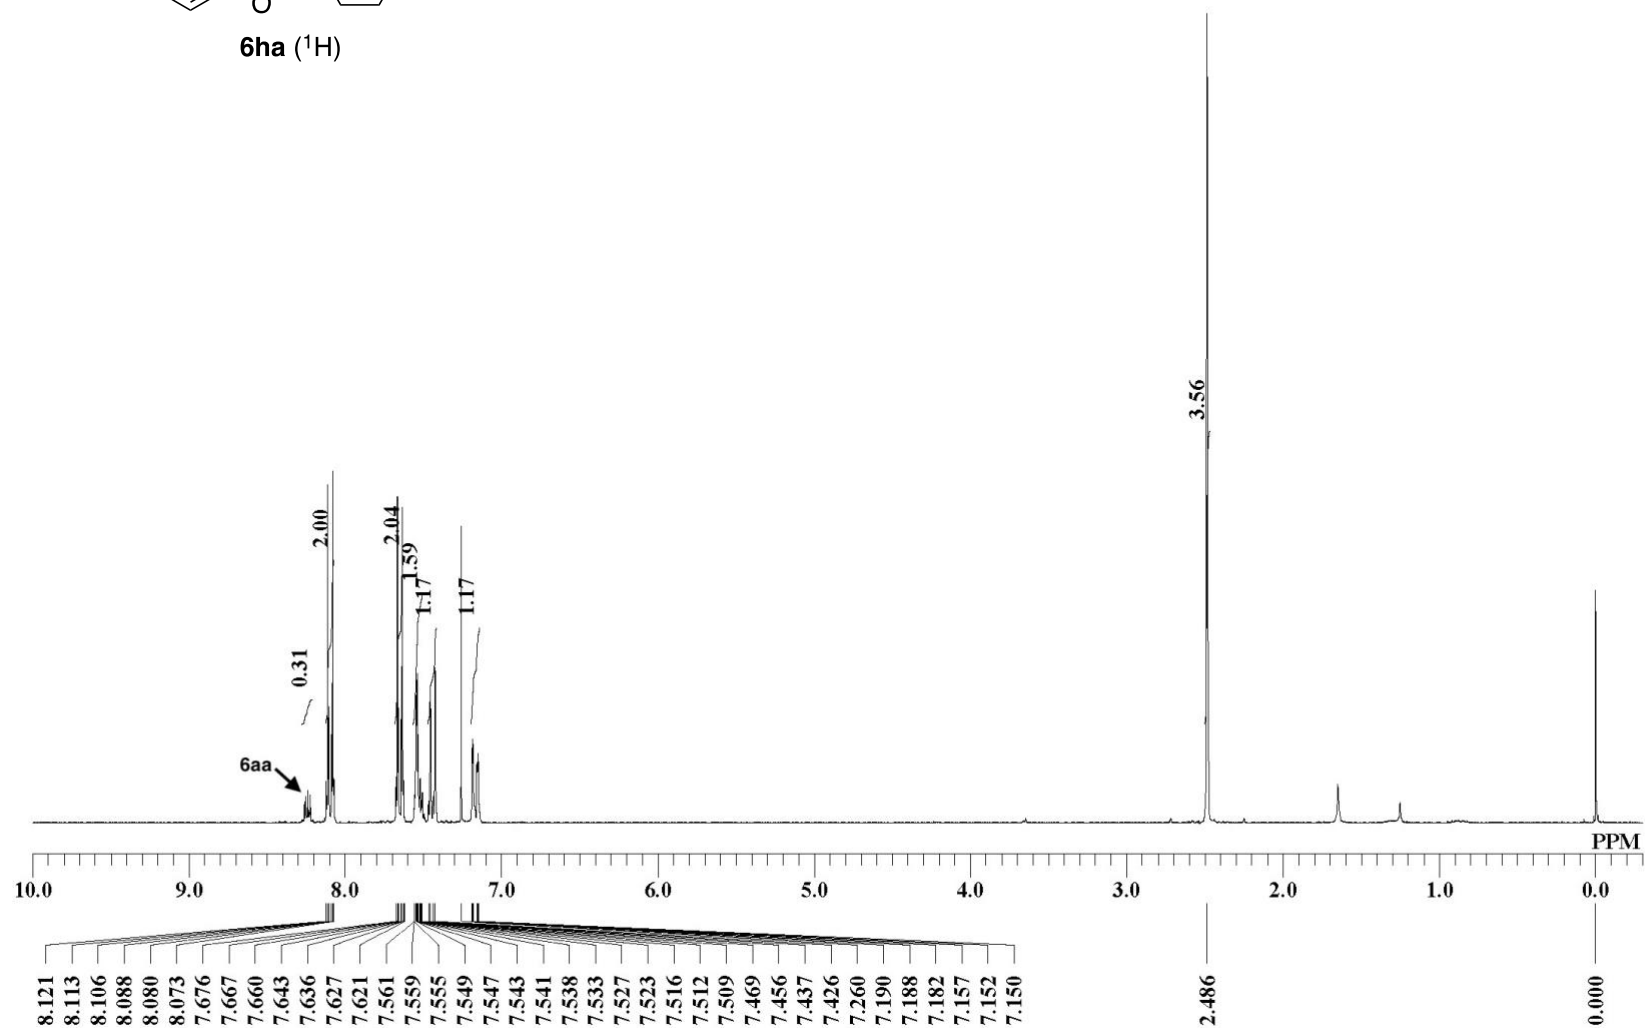

6KO-259 Fr3

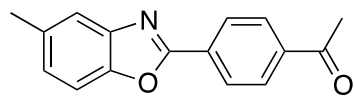

**6ia** ( $^1\text{H}$ )

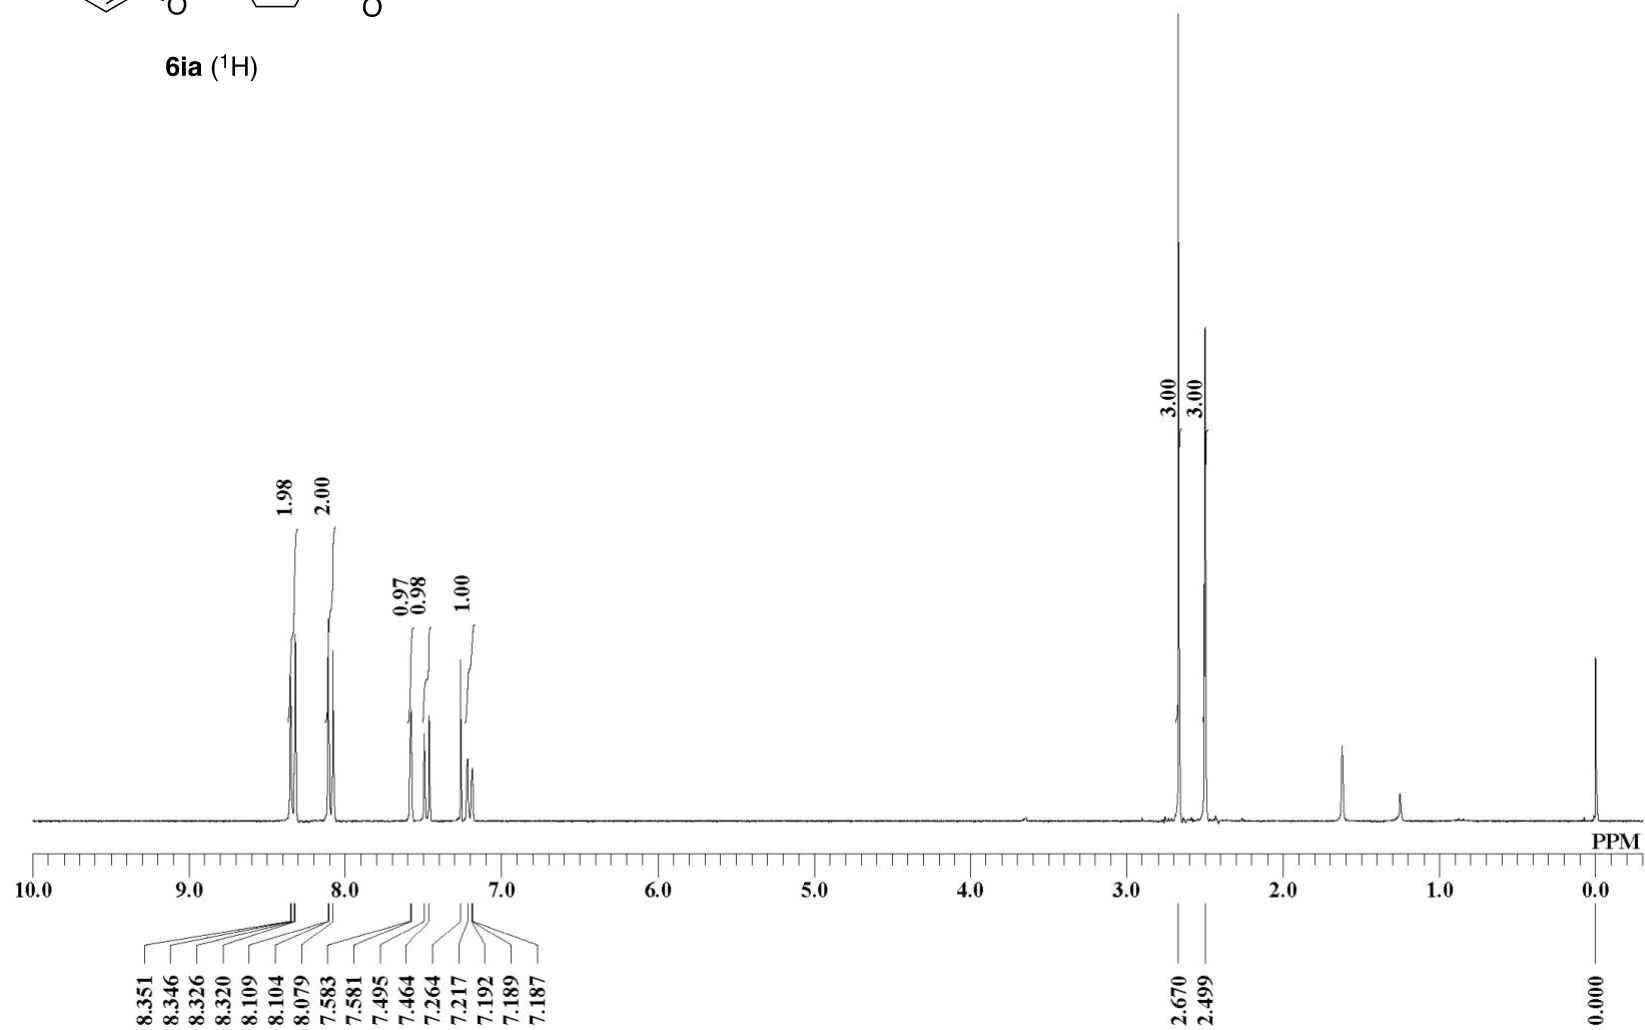

6KO-259 Fr  $^{13}\text{C}$

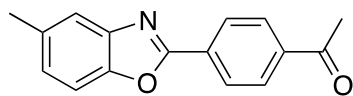

**6ia** ( $^{13}\text{C}$ )

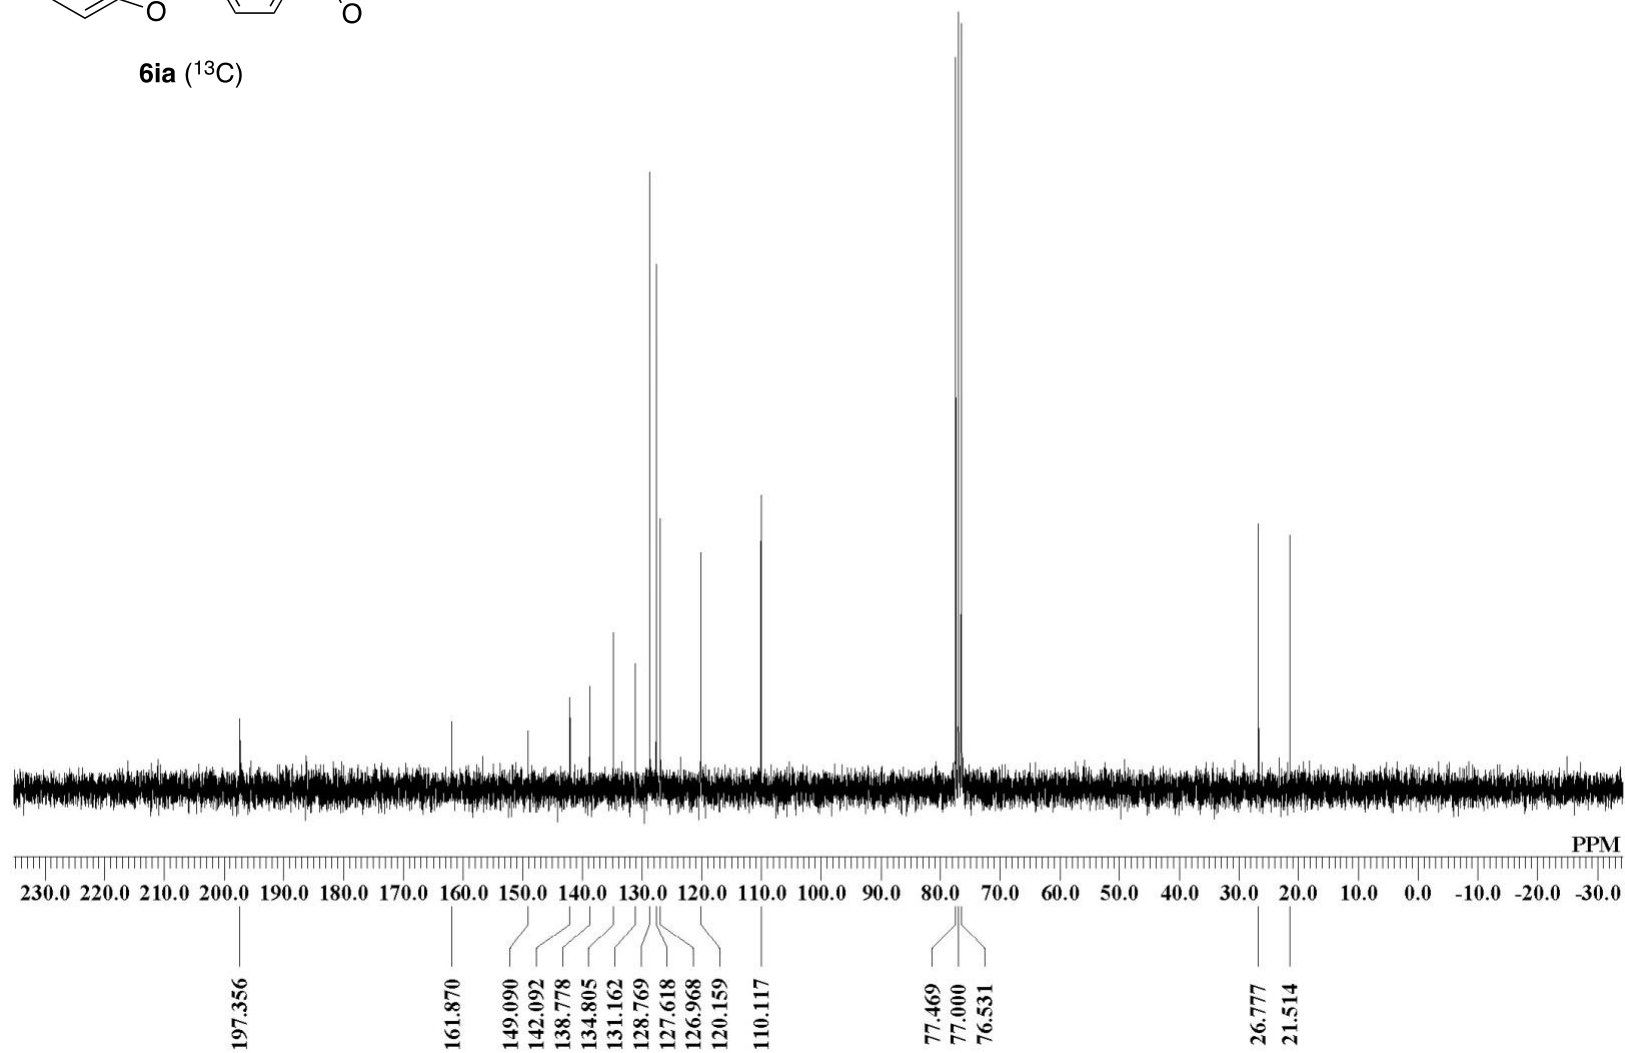

6KO-260 Fr2

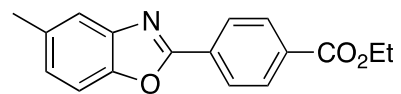

**6ja** (<sup>1</sup>H)

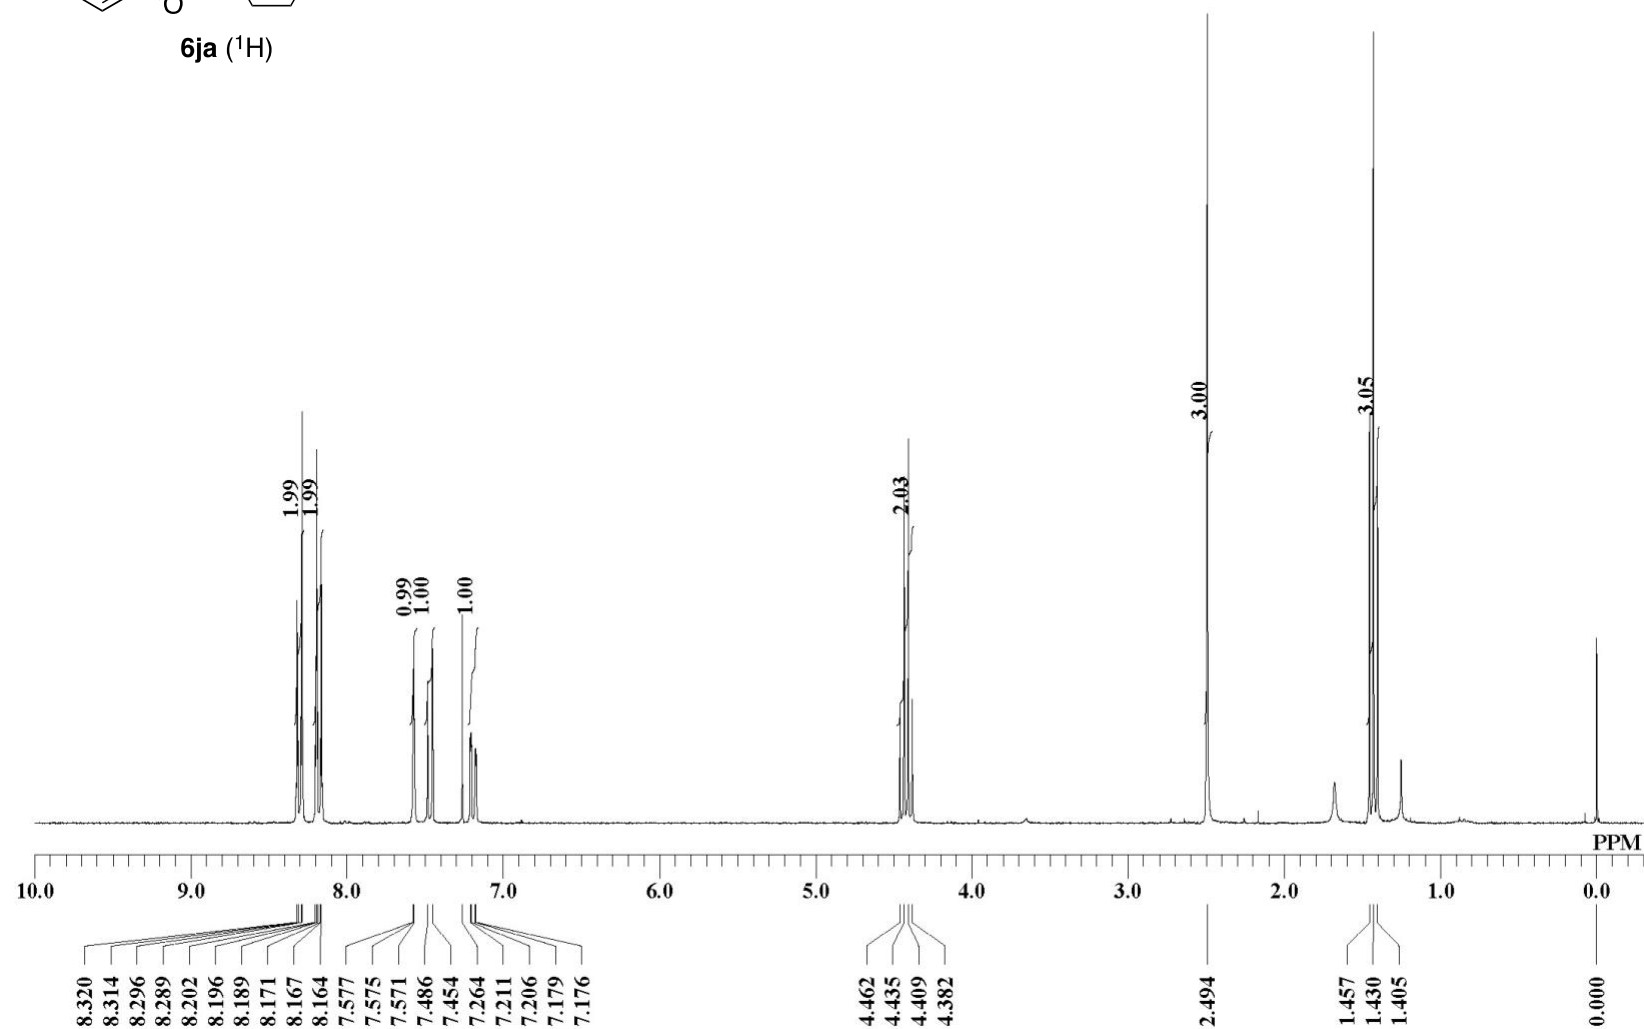

6KO-277 Fr

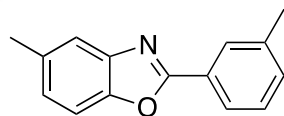

**6ka** ( $^1\text{H}$ )

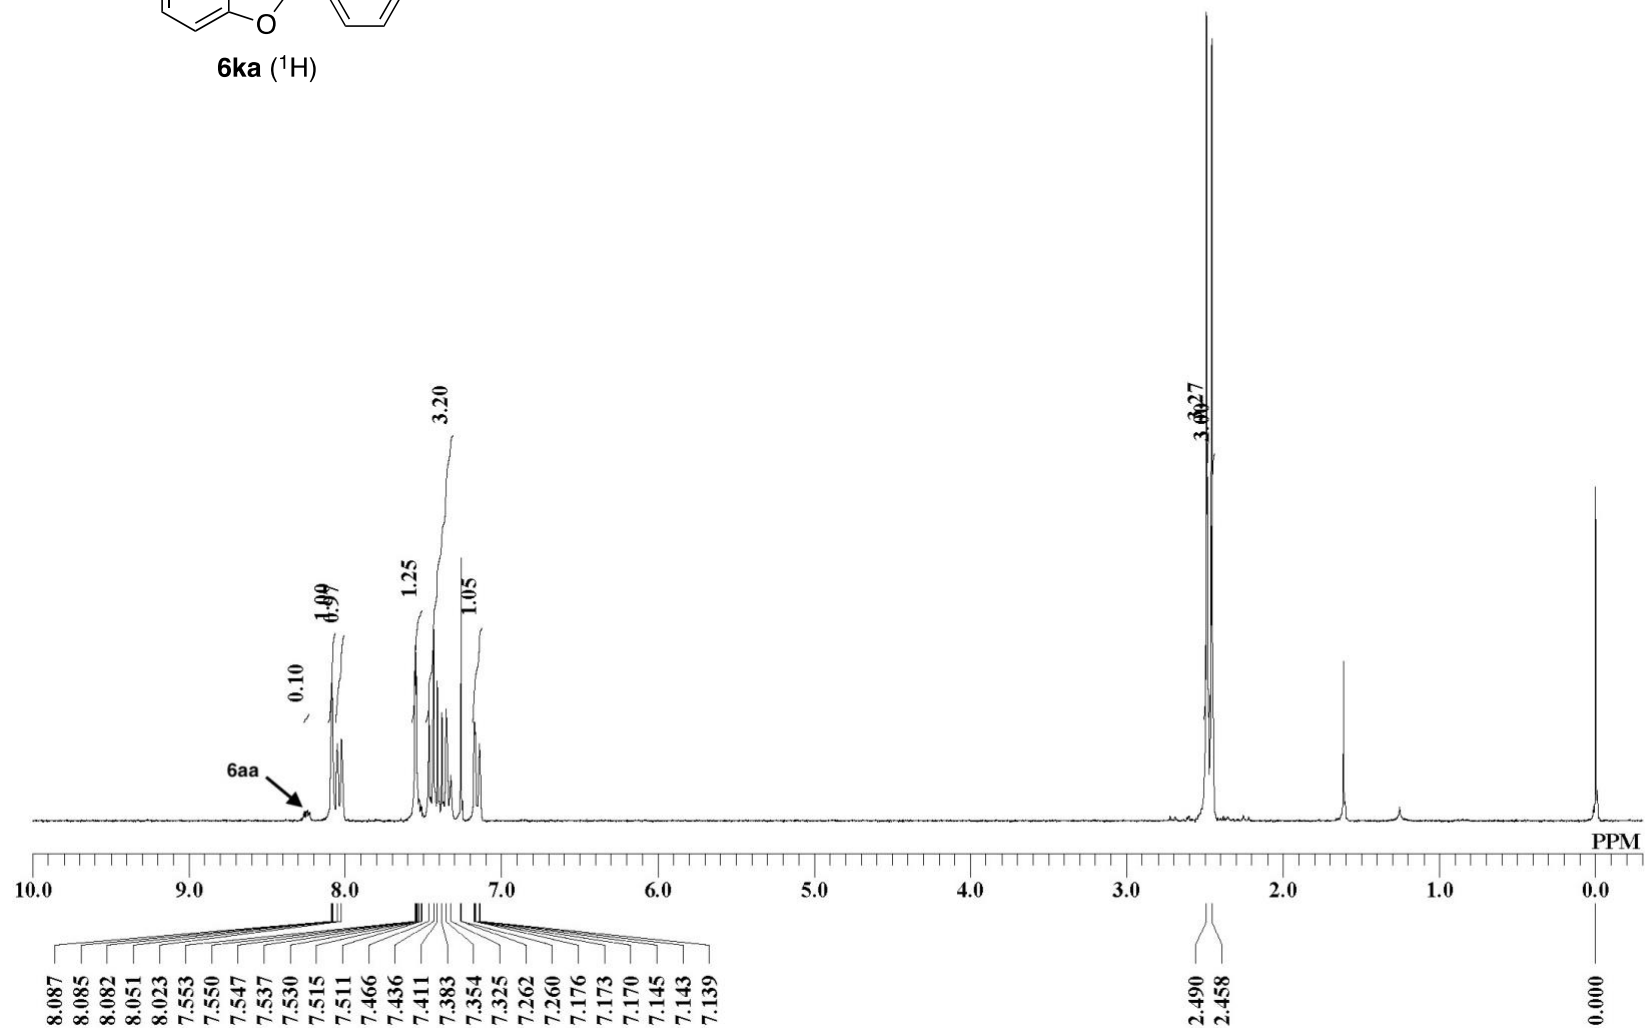

6KO-257 Fr

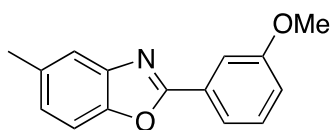

**6la** (<sup>1</sup>H)

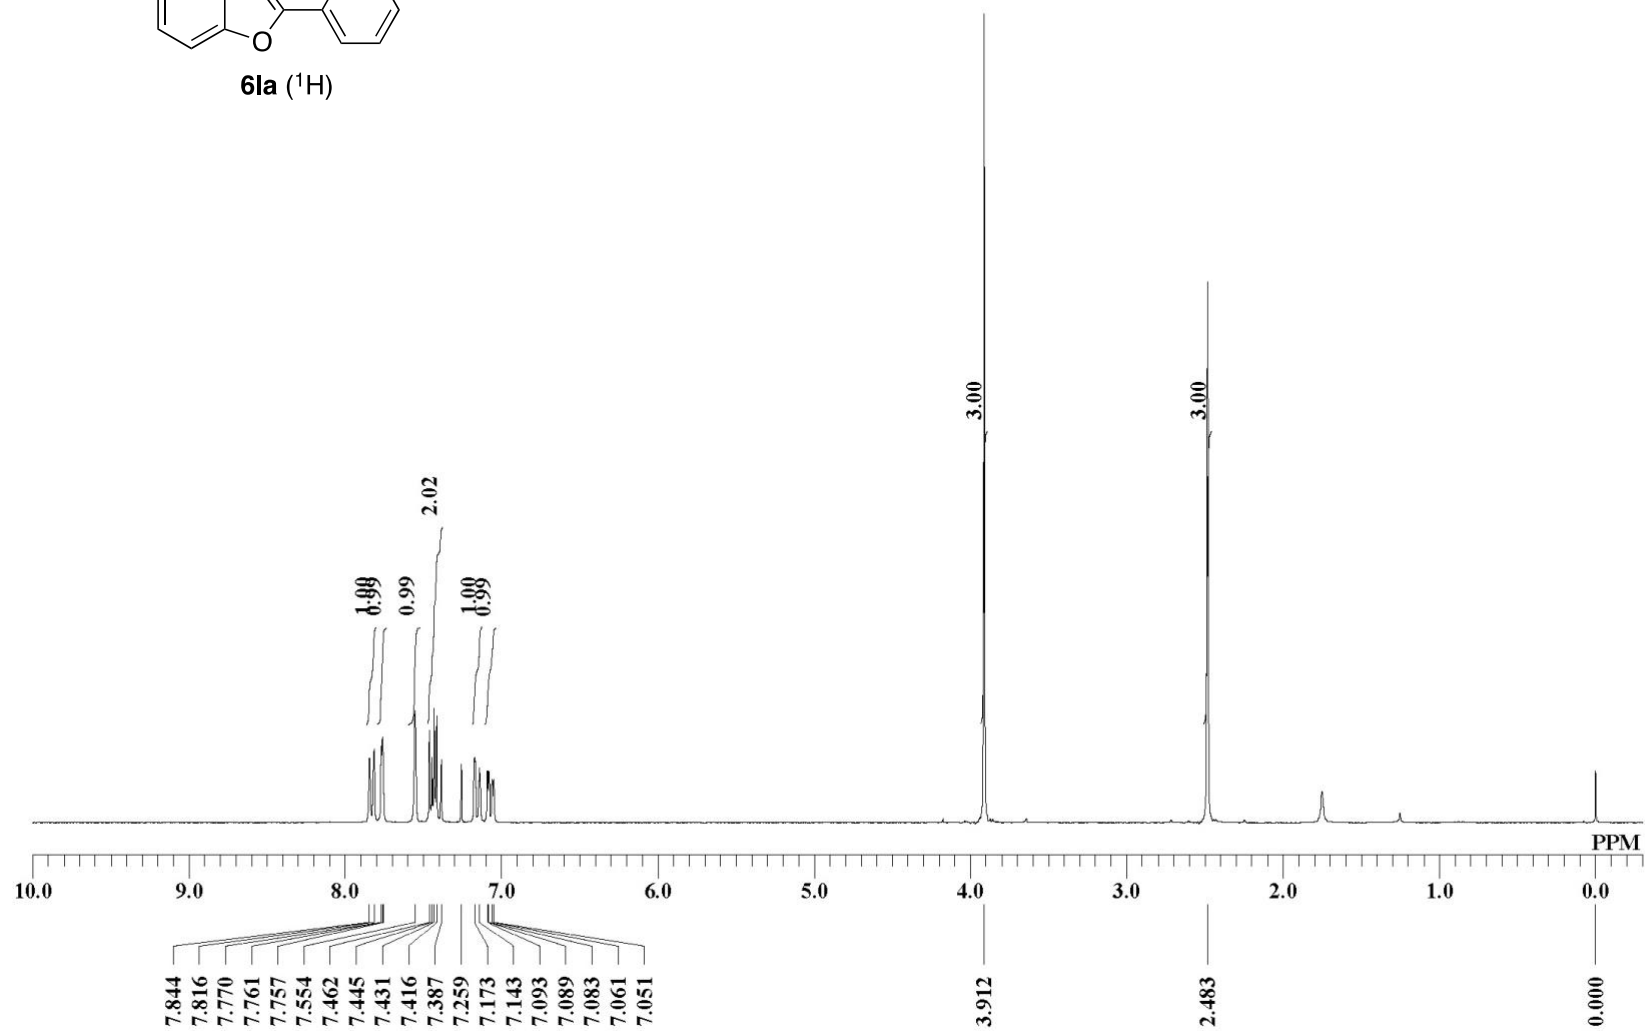

6KO-268 Fr

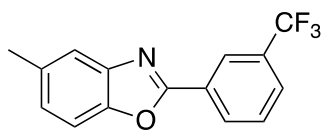

**6ma** ( $^1\text{H}$ )

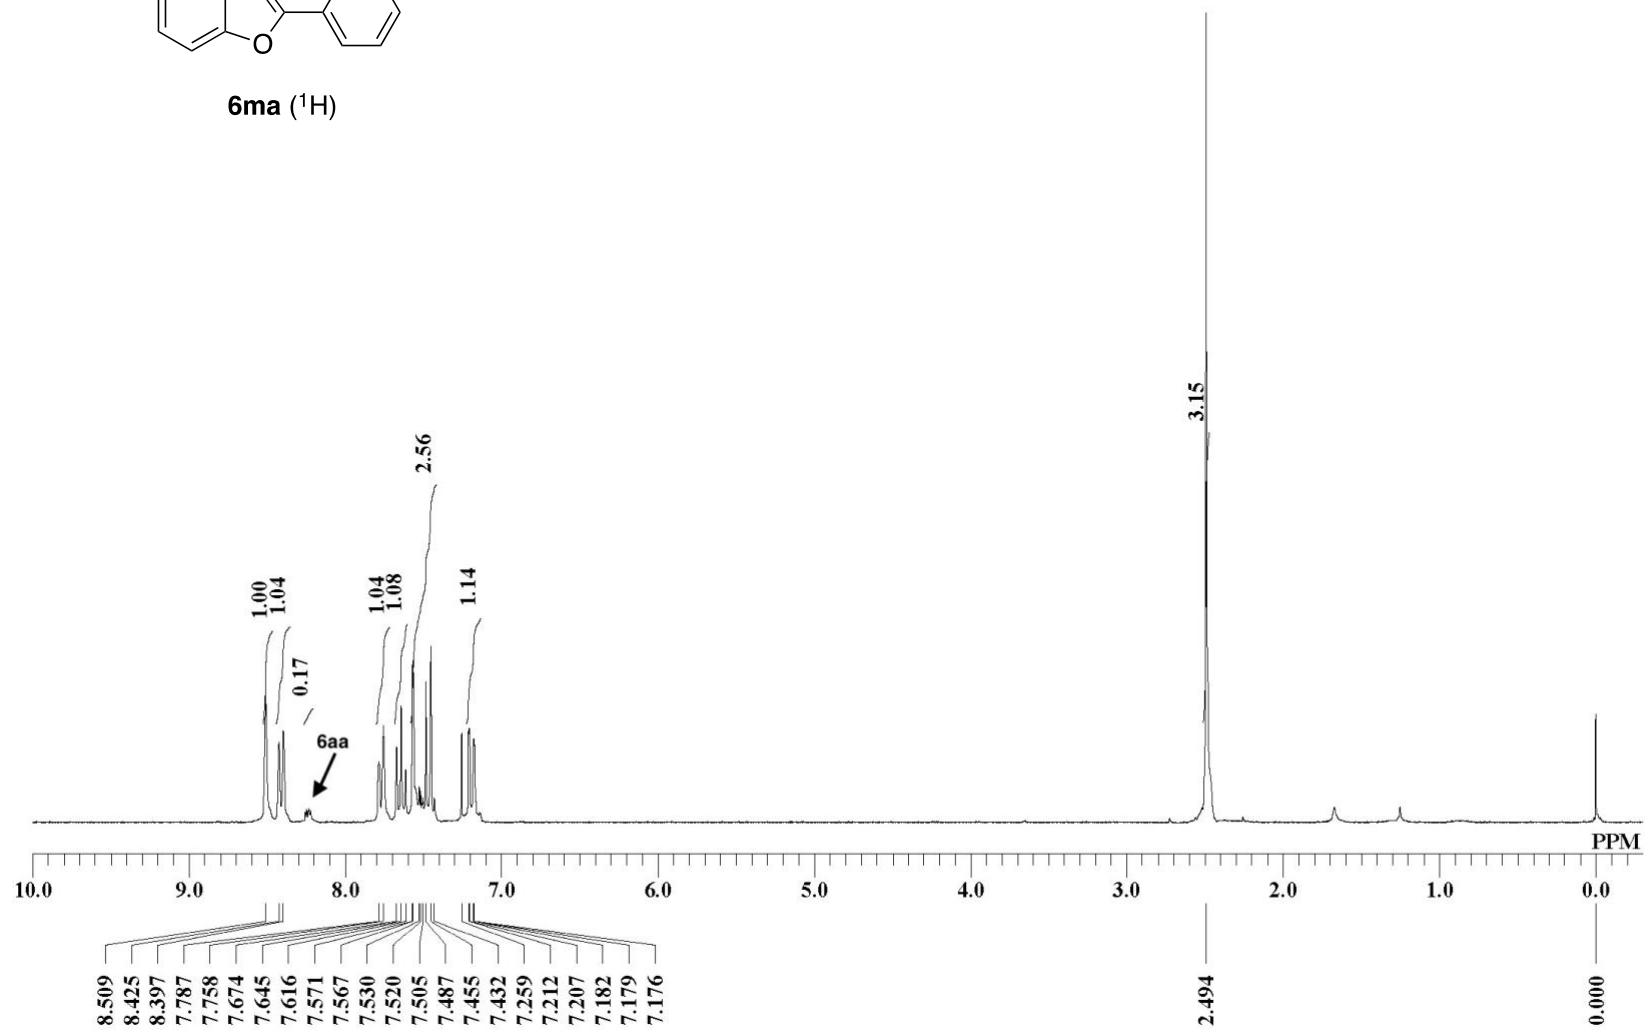

6KO-268 Fr 13C 500MHz

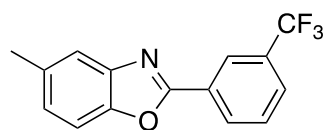

**6ma** ( $^{13}\text{C}$ )

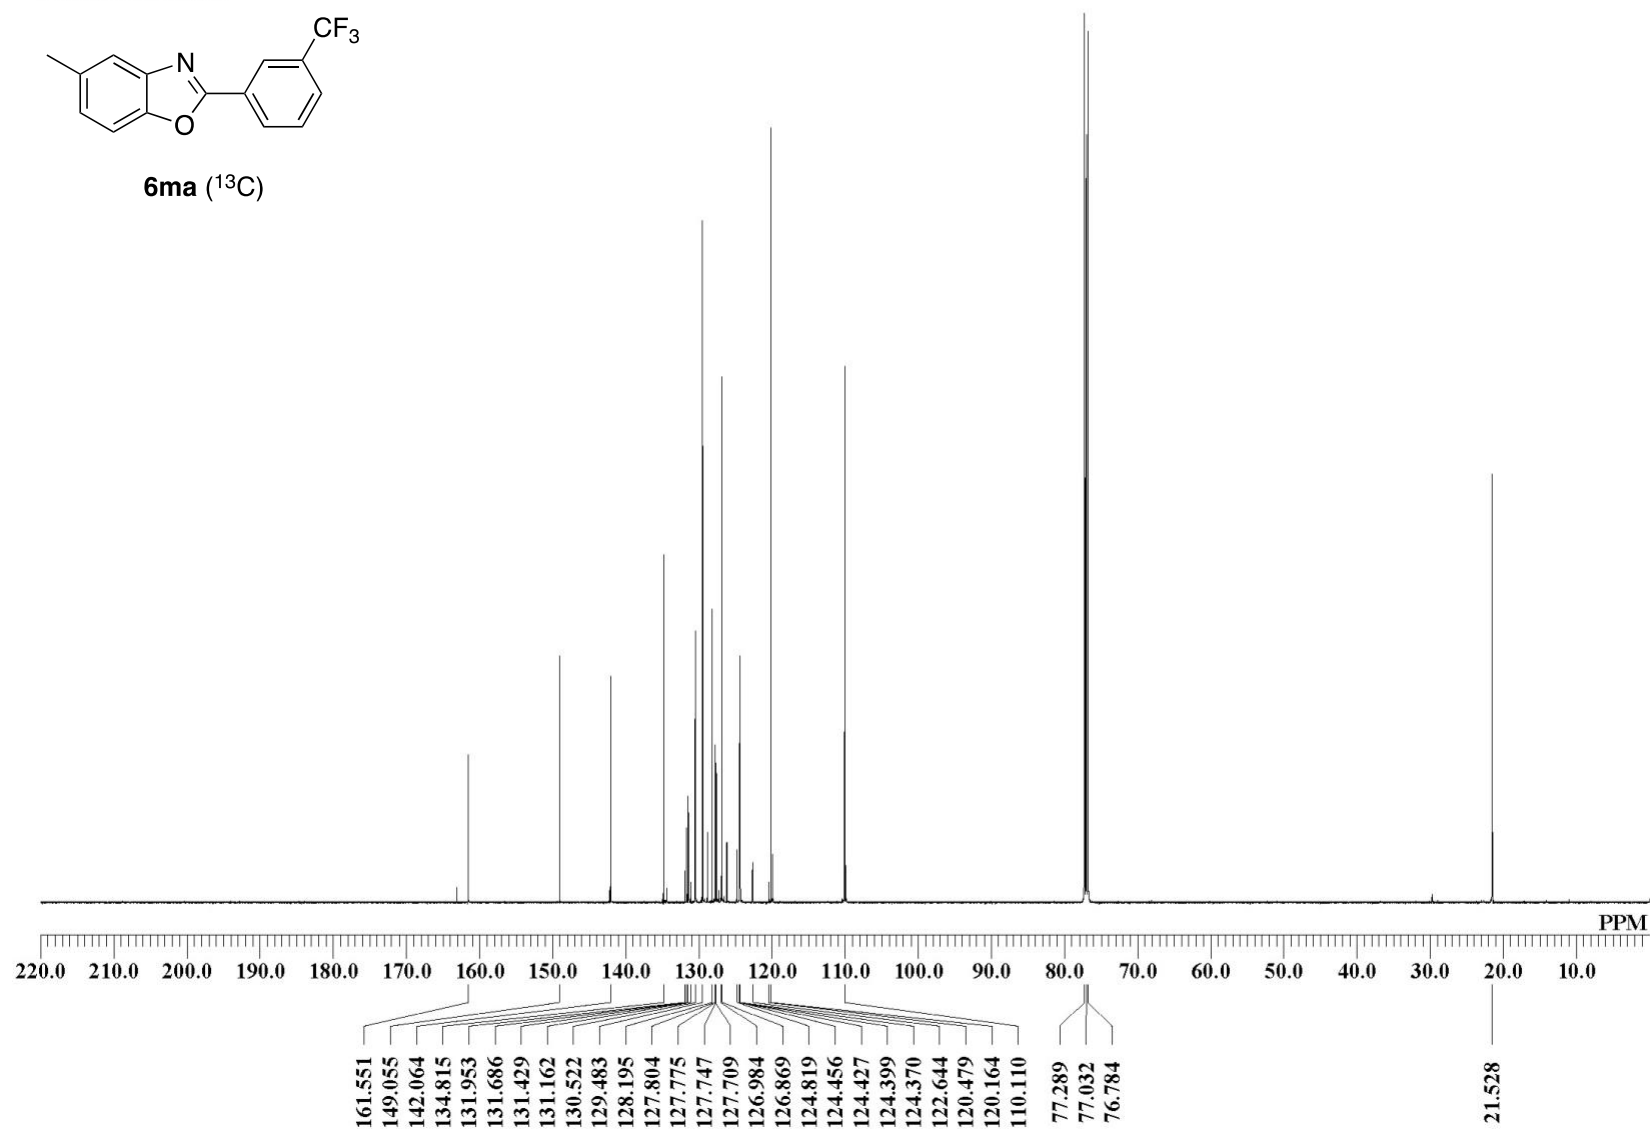

6KO-268 Fr  $^{19}\text{F}$

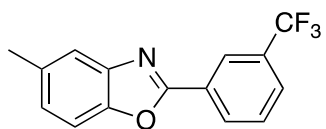

**6ma** ( $^{19}\text{F}$ )

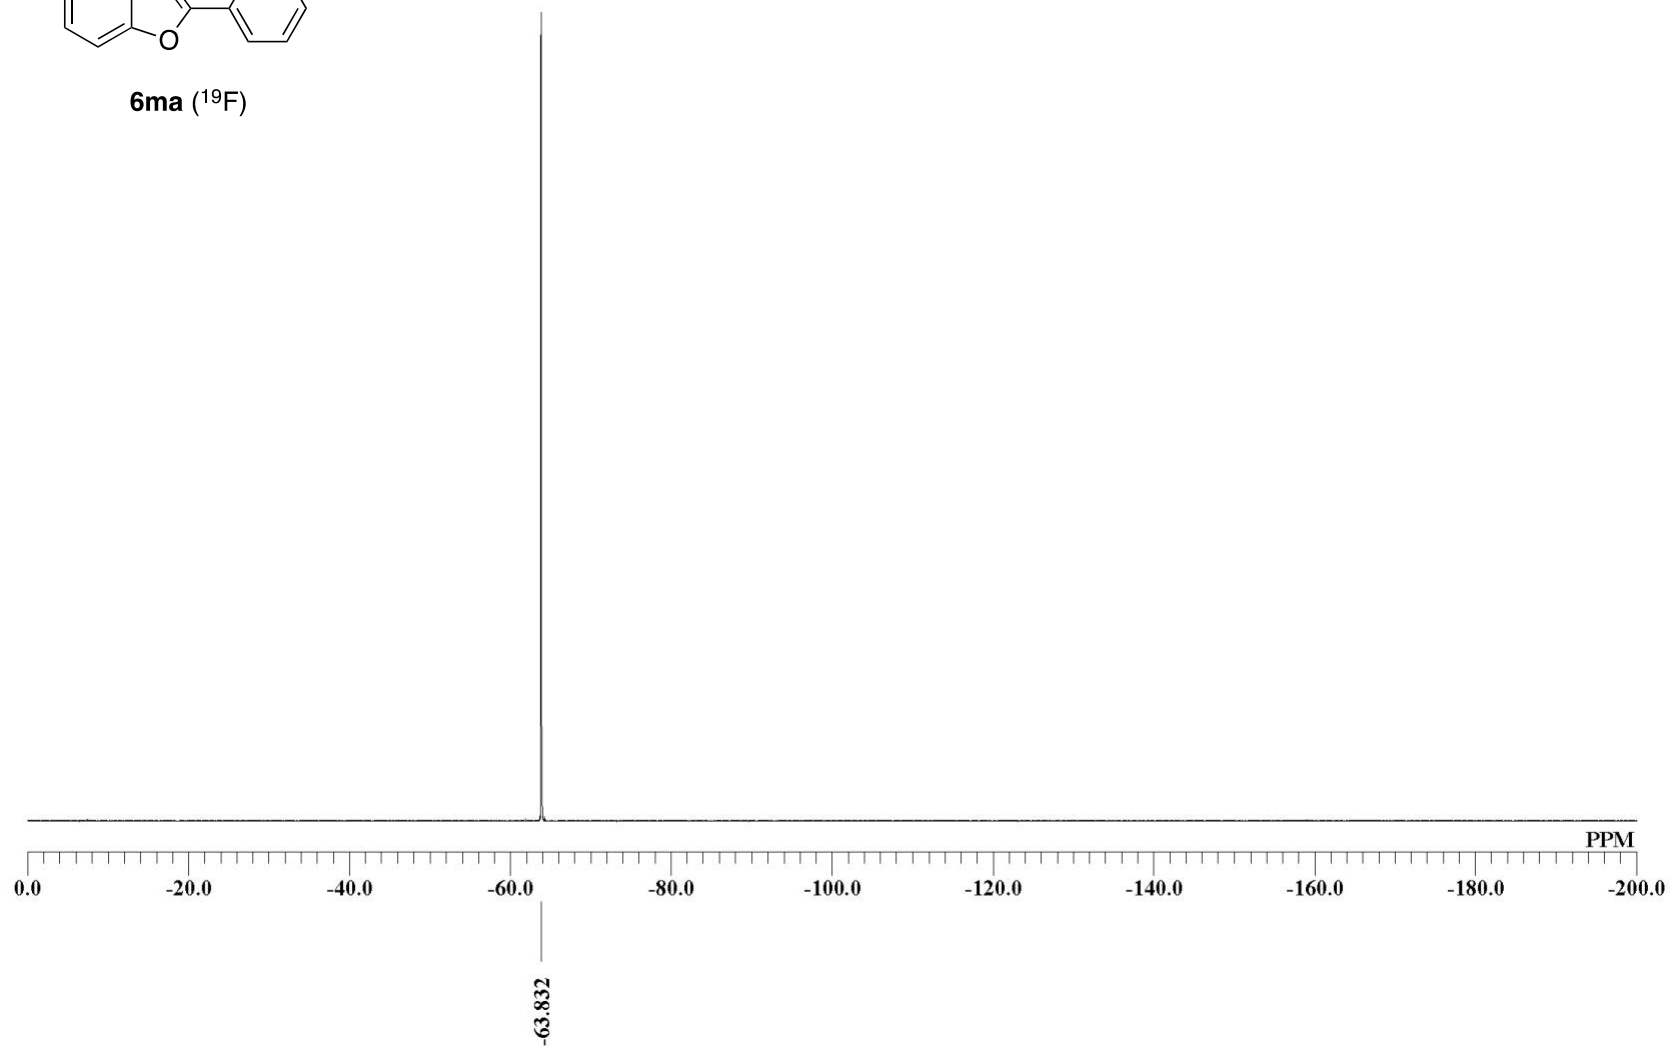

6KO-278 Fr

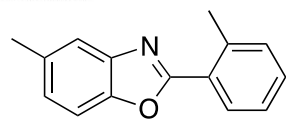

**6na** (<sup>1</sup>H)

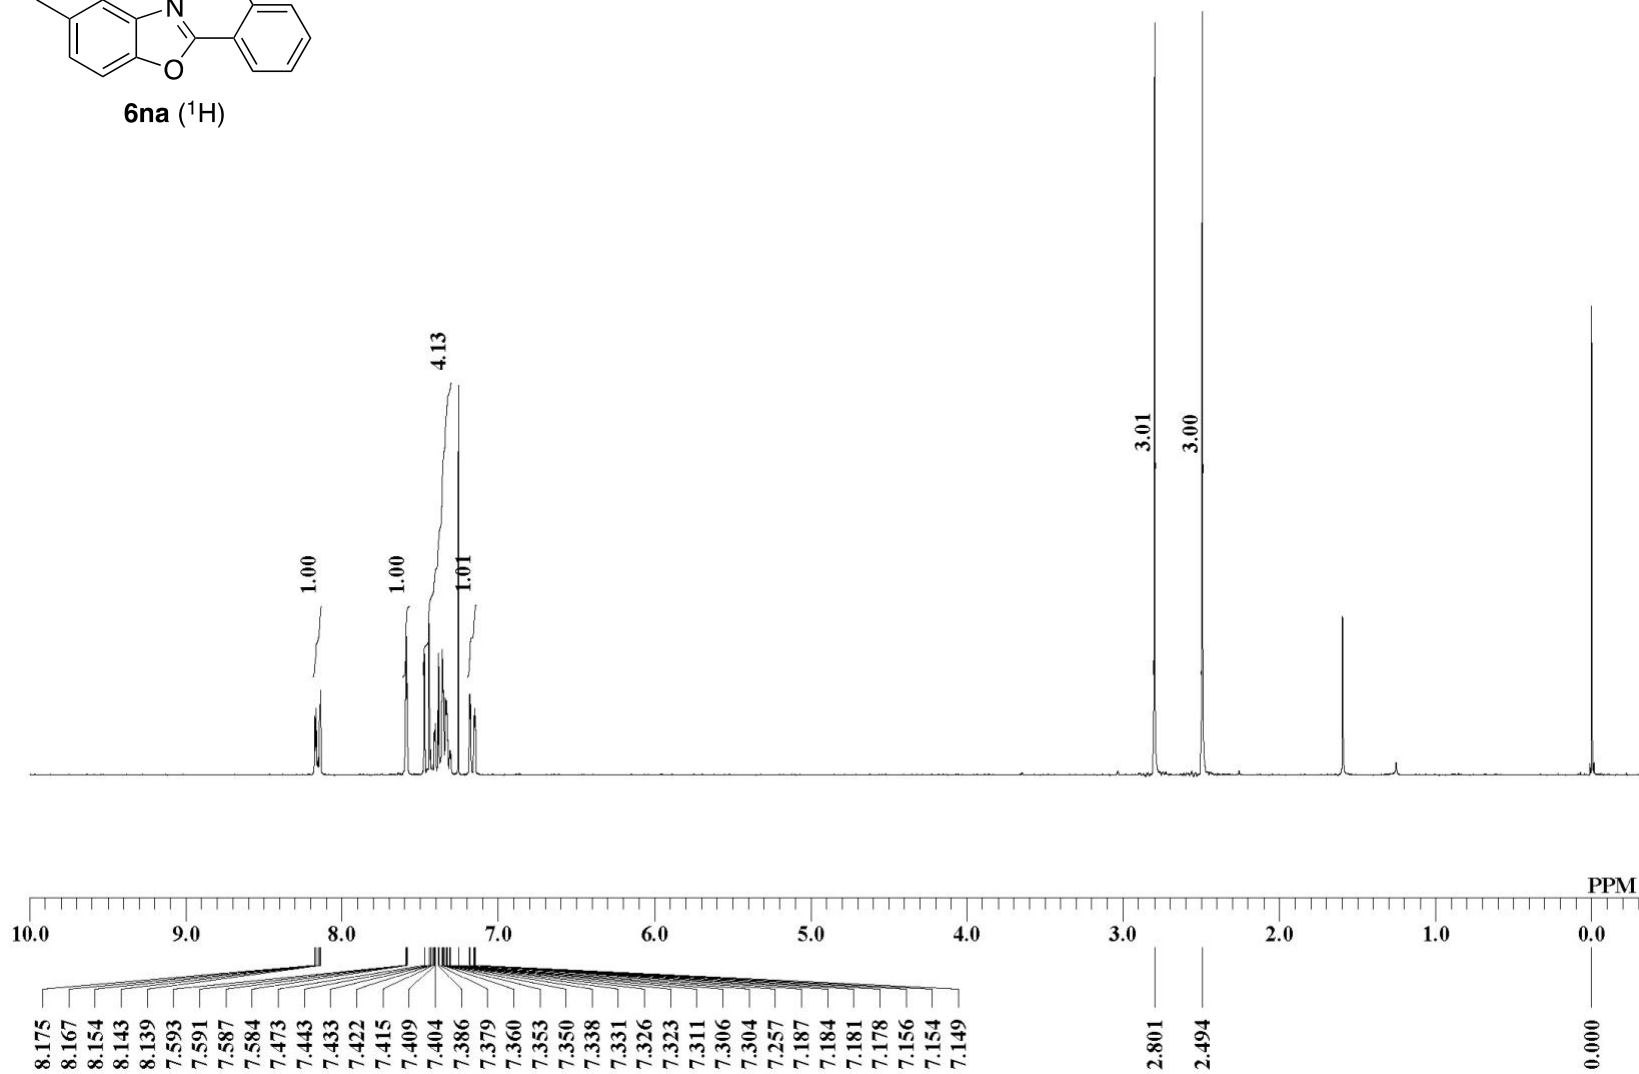

6KO-275 Fr

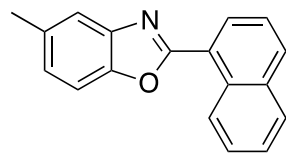

**60a** (<sup>1</sup>H)

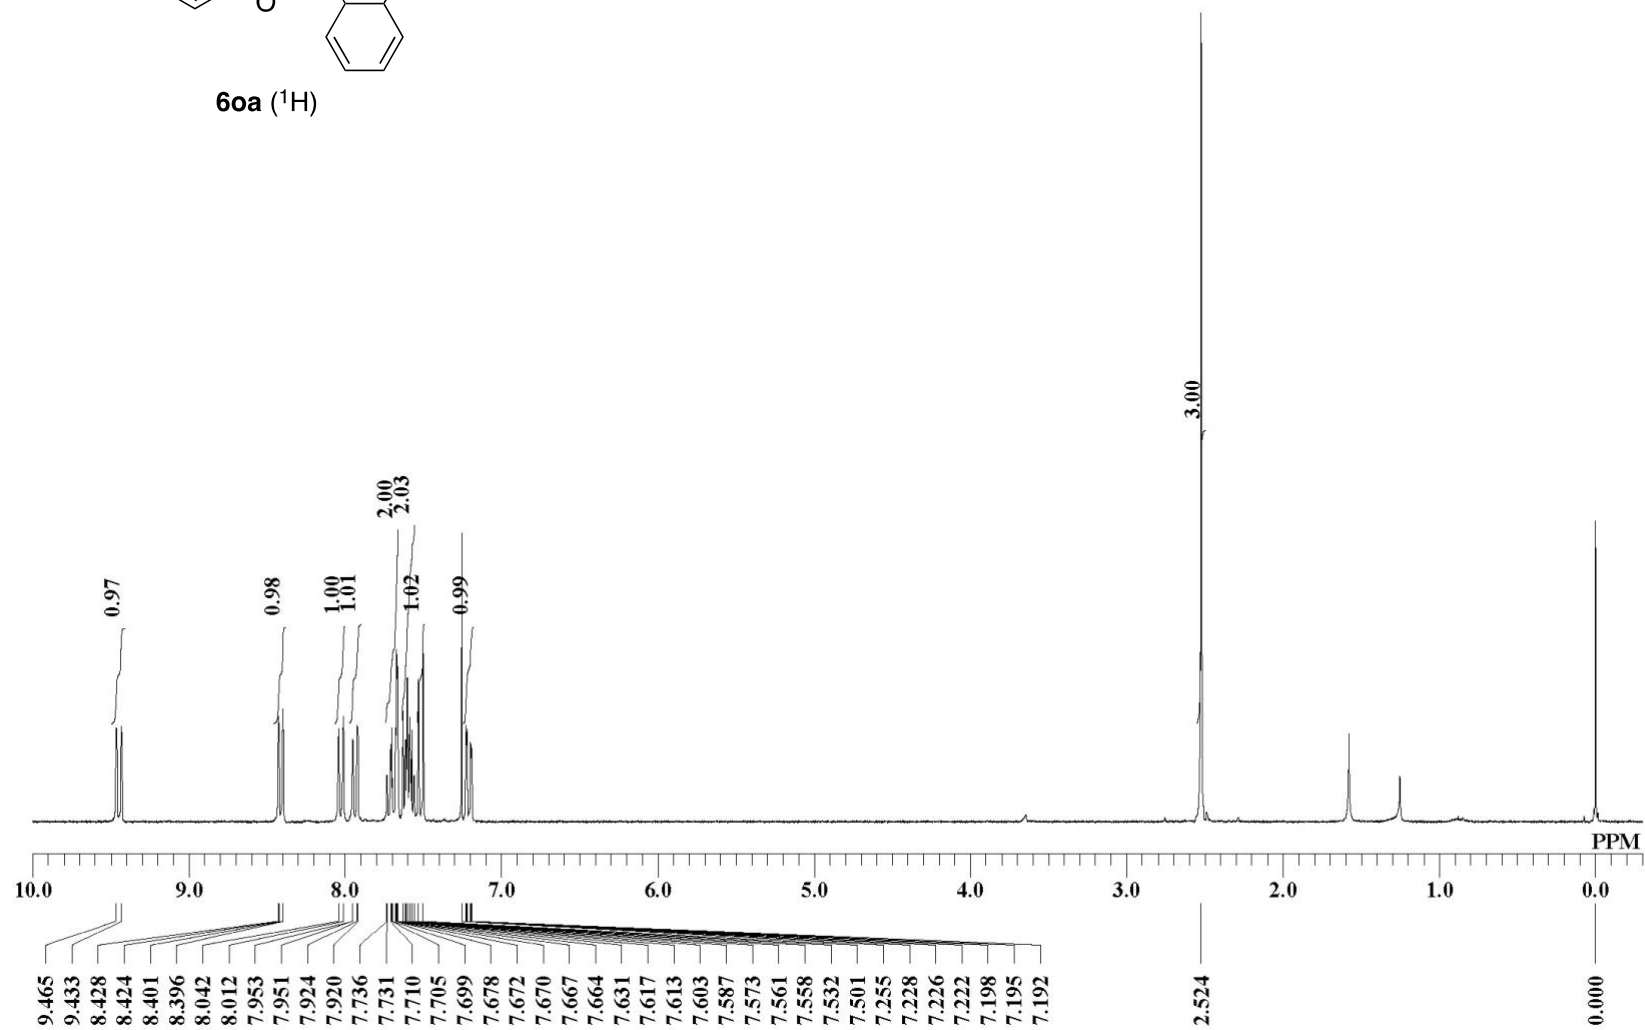

6KO-274 Fr

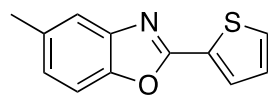

**6pa** ( $^1\text{H}$ )

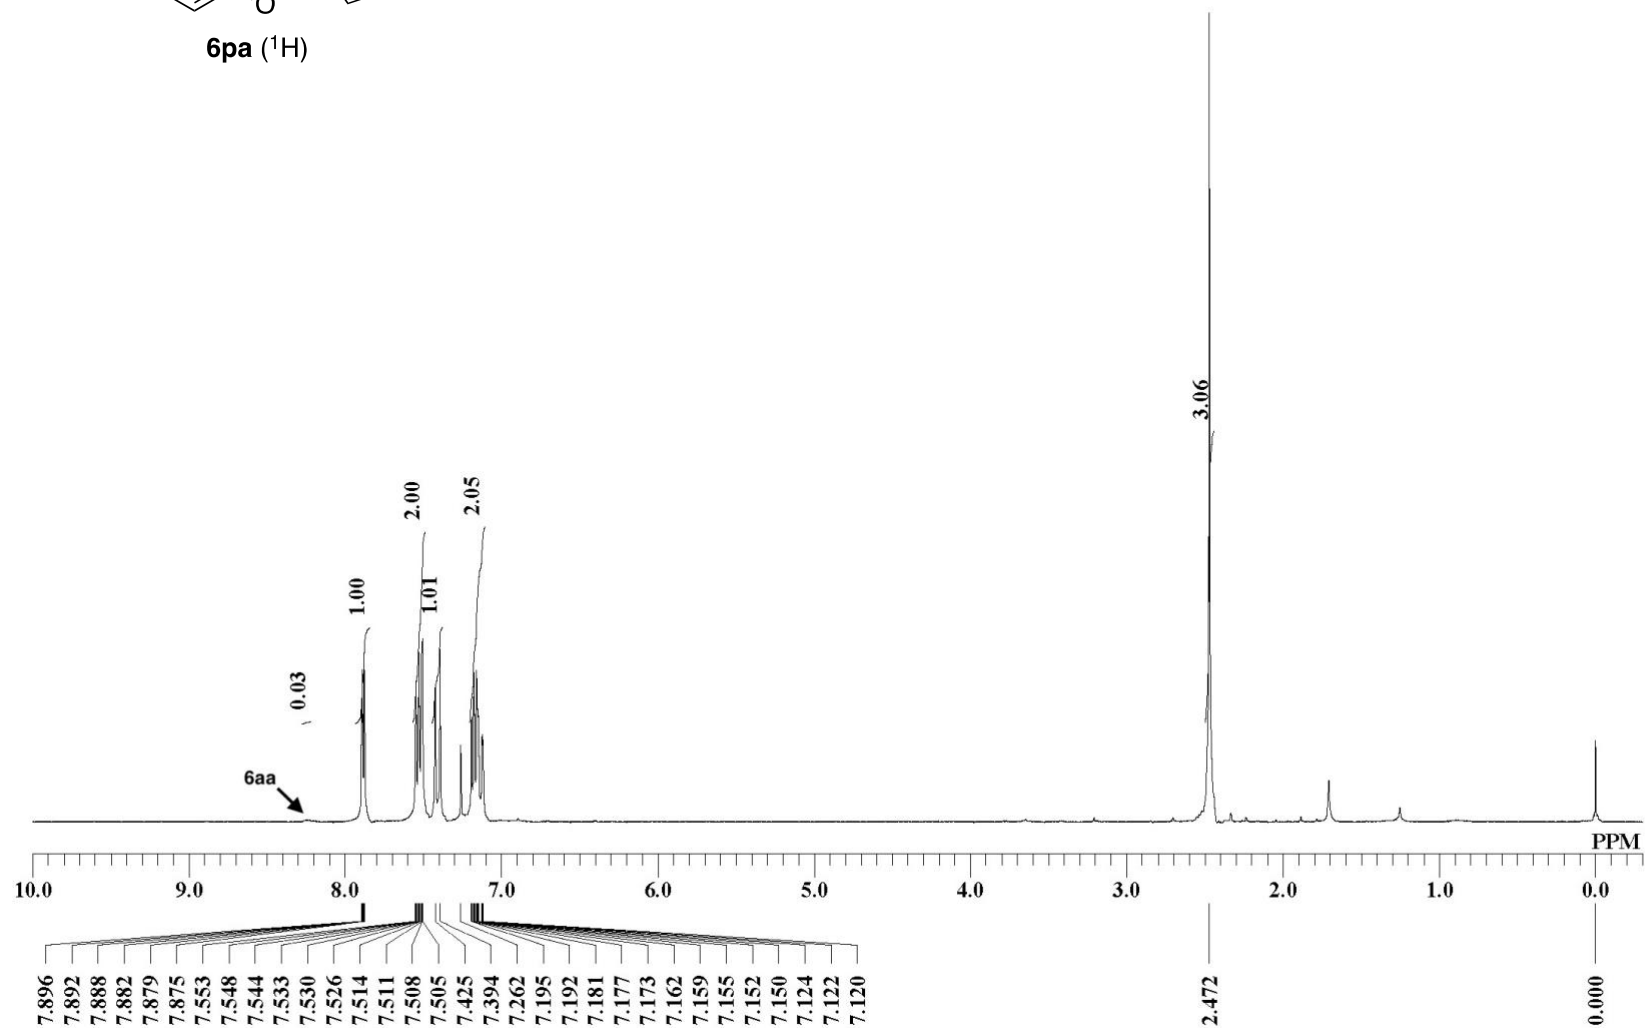

6KO-266 Fr

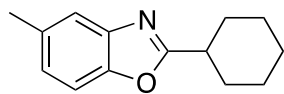

**6qa** ( $^1\text{H}$ )

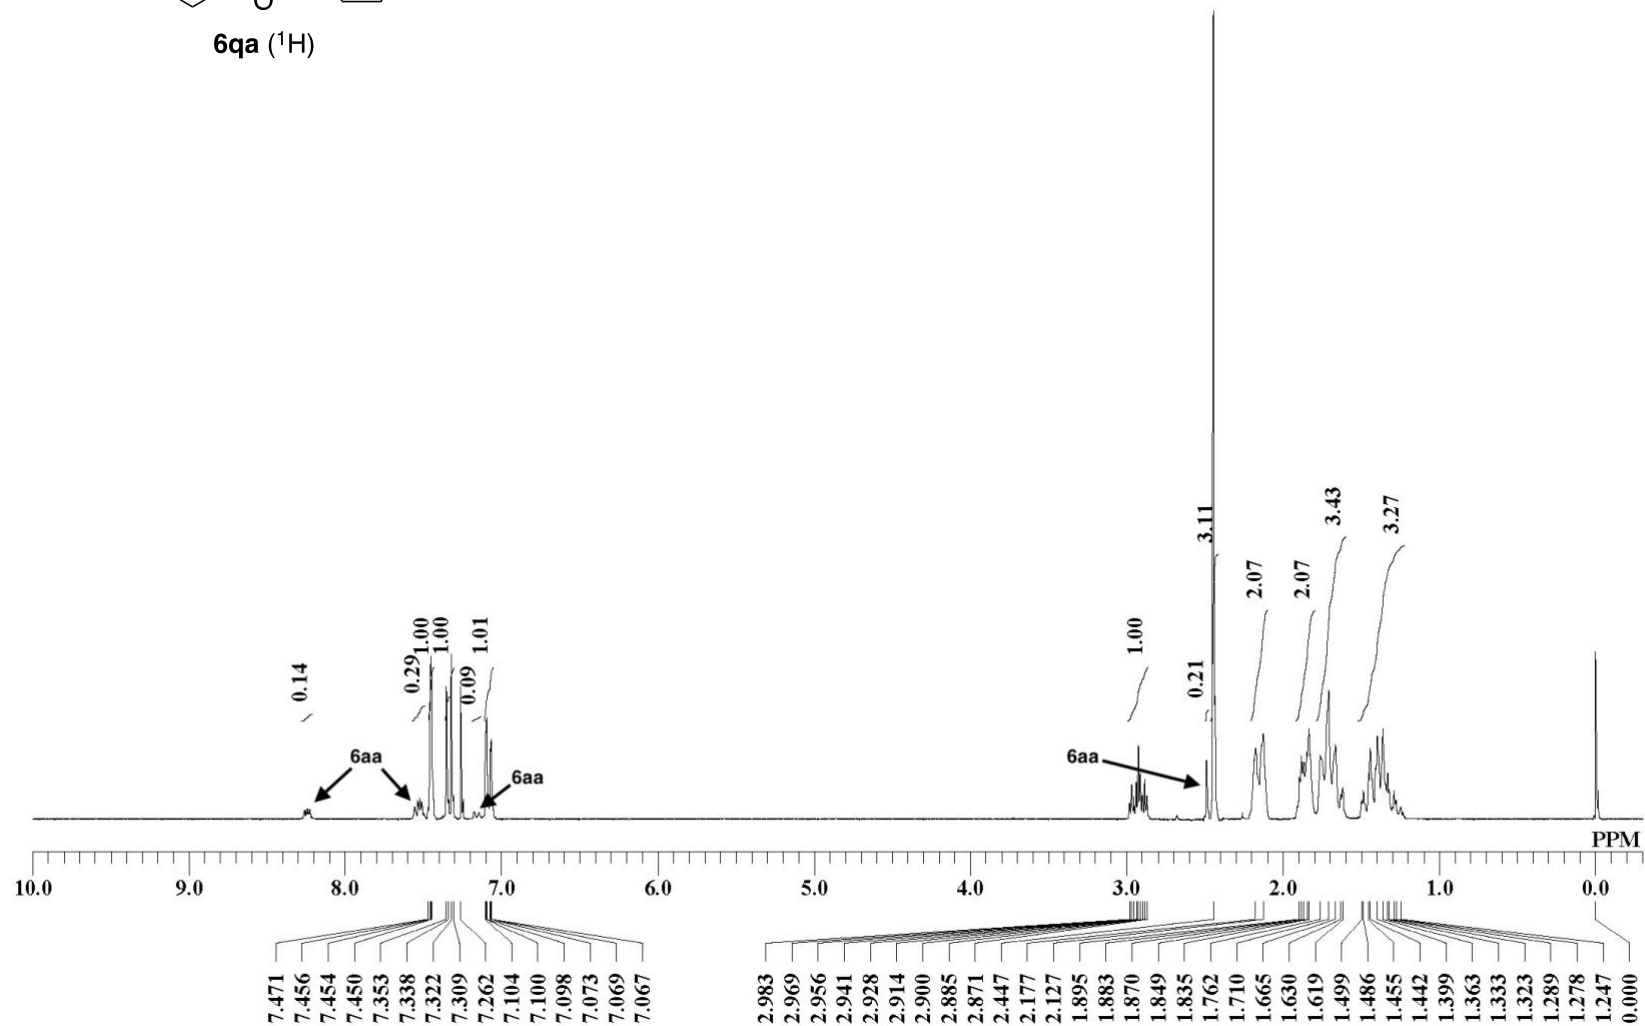

6KO-261 Fr2

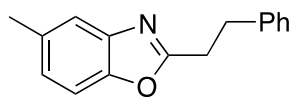

**6ra** ( $^1\text{H}$ )

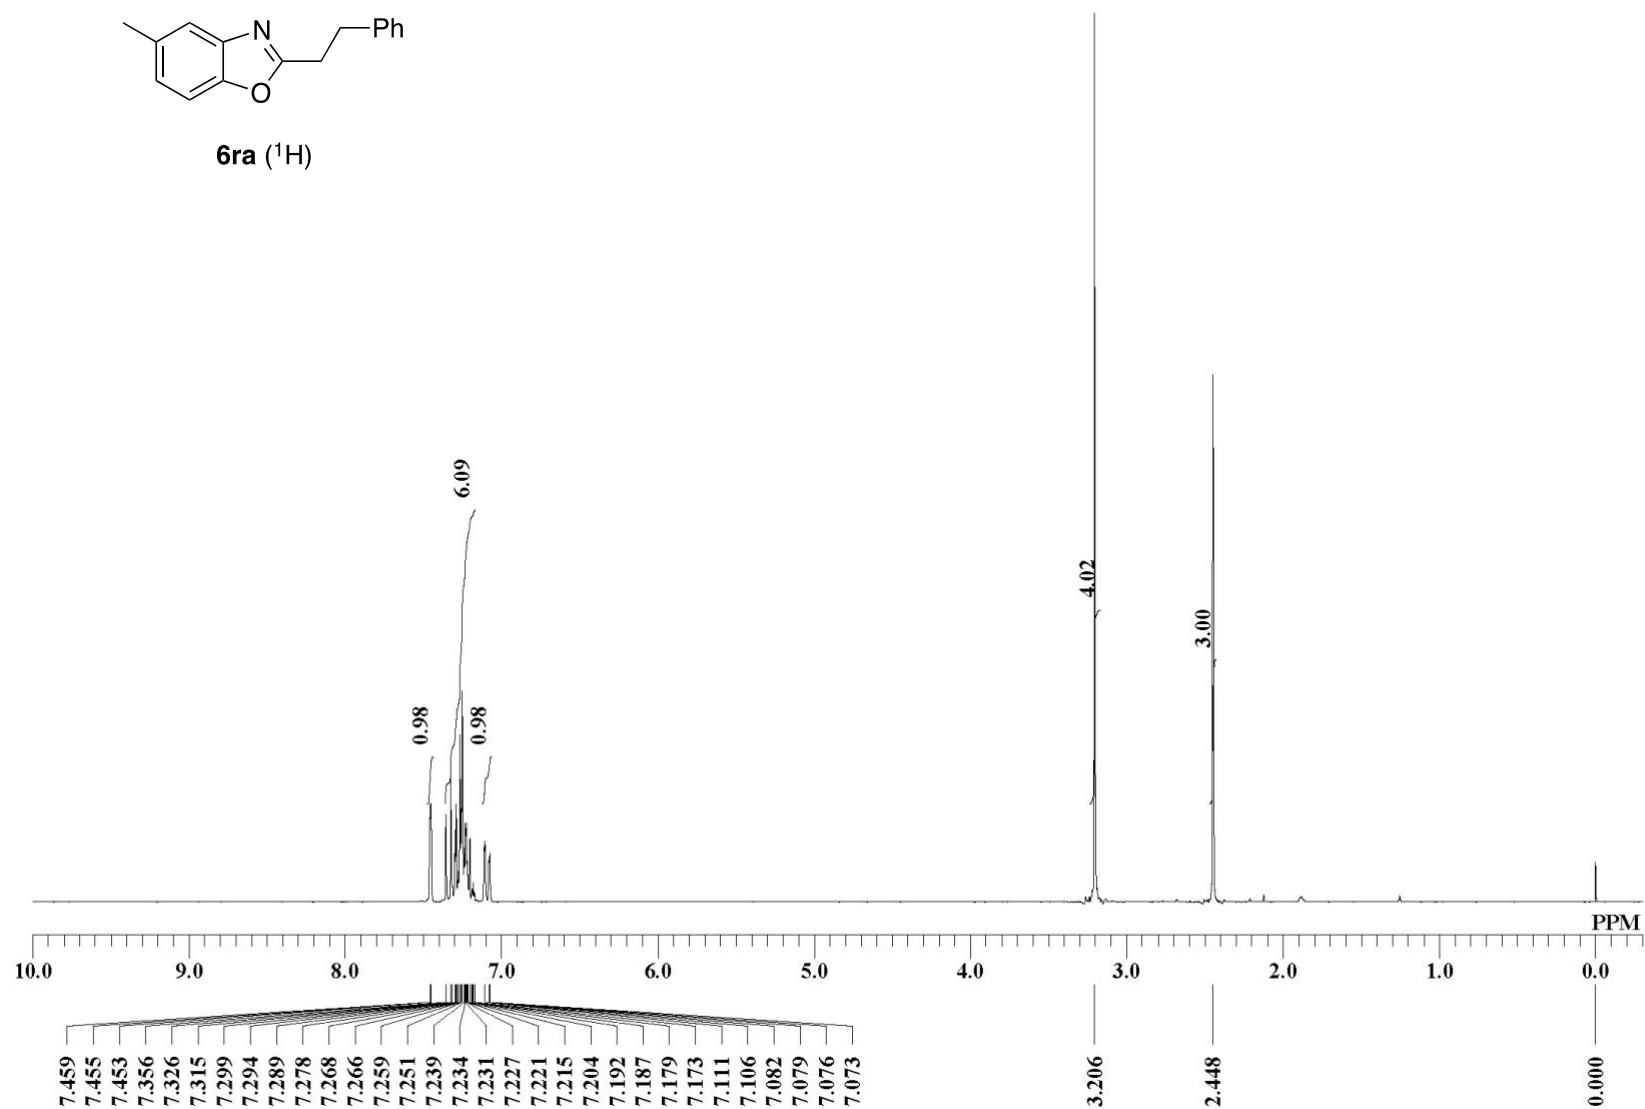

6KO-261 Fr  $^{13}\text{C}$

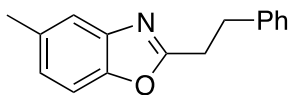

**6ra** ( $^{13}\text{C}$ )

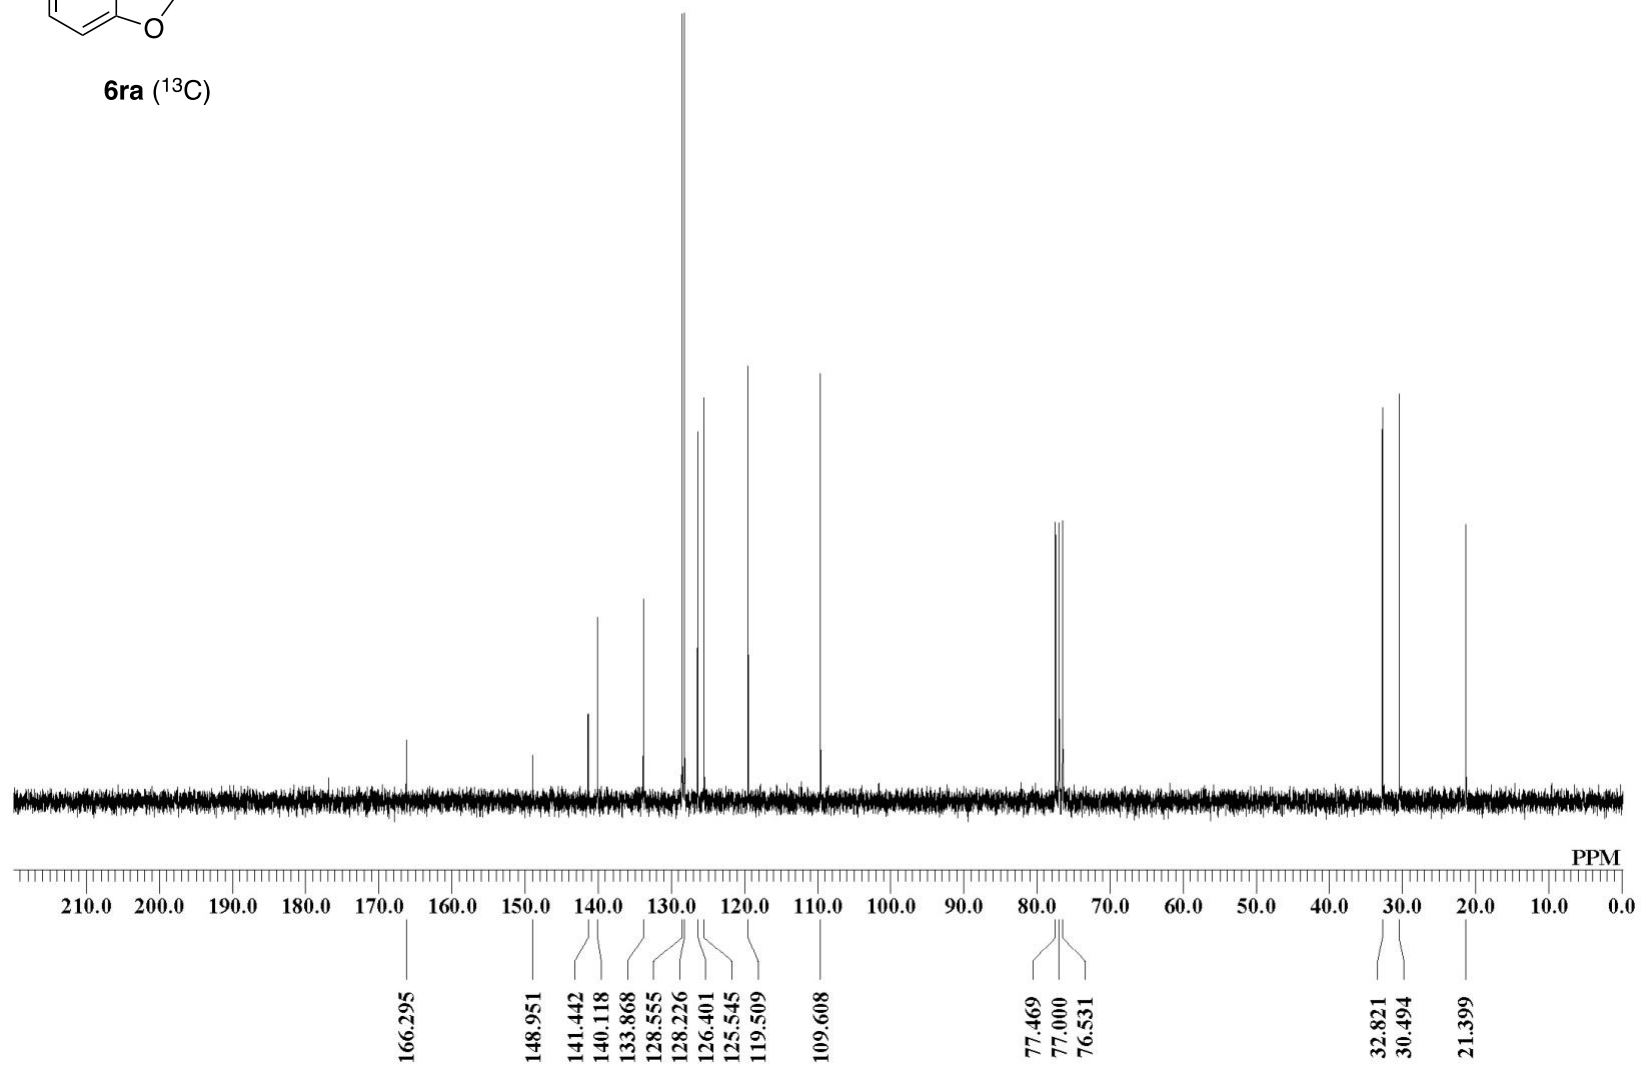

6KO-305 Fr2

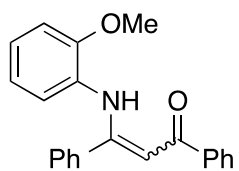

7 (<sup>1</sup>H)

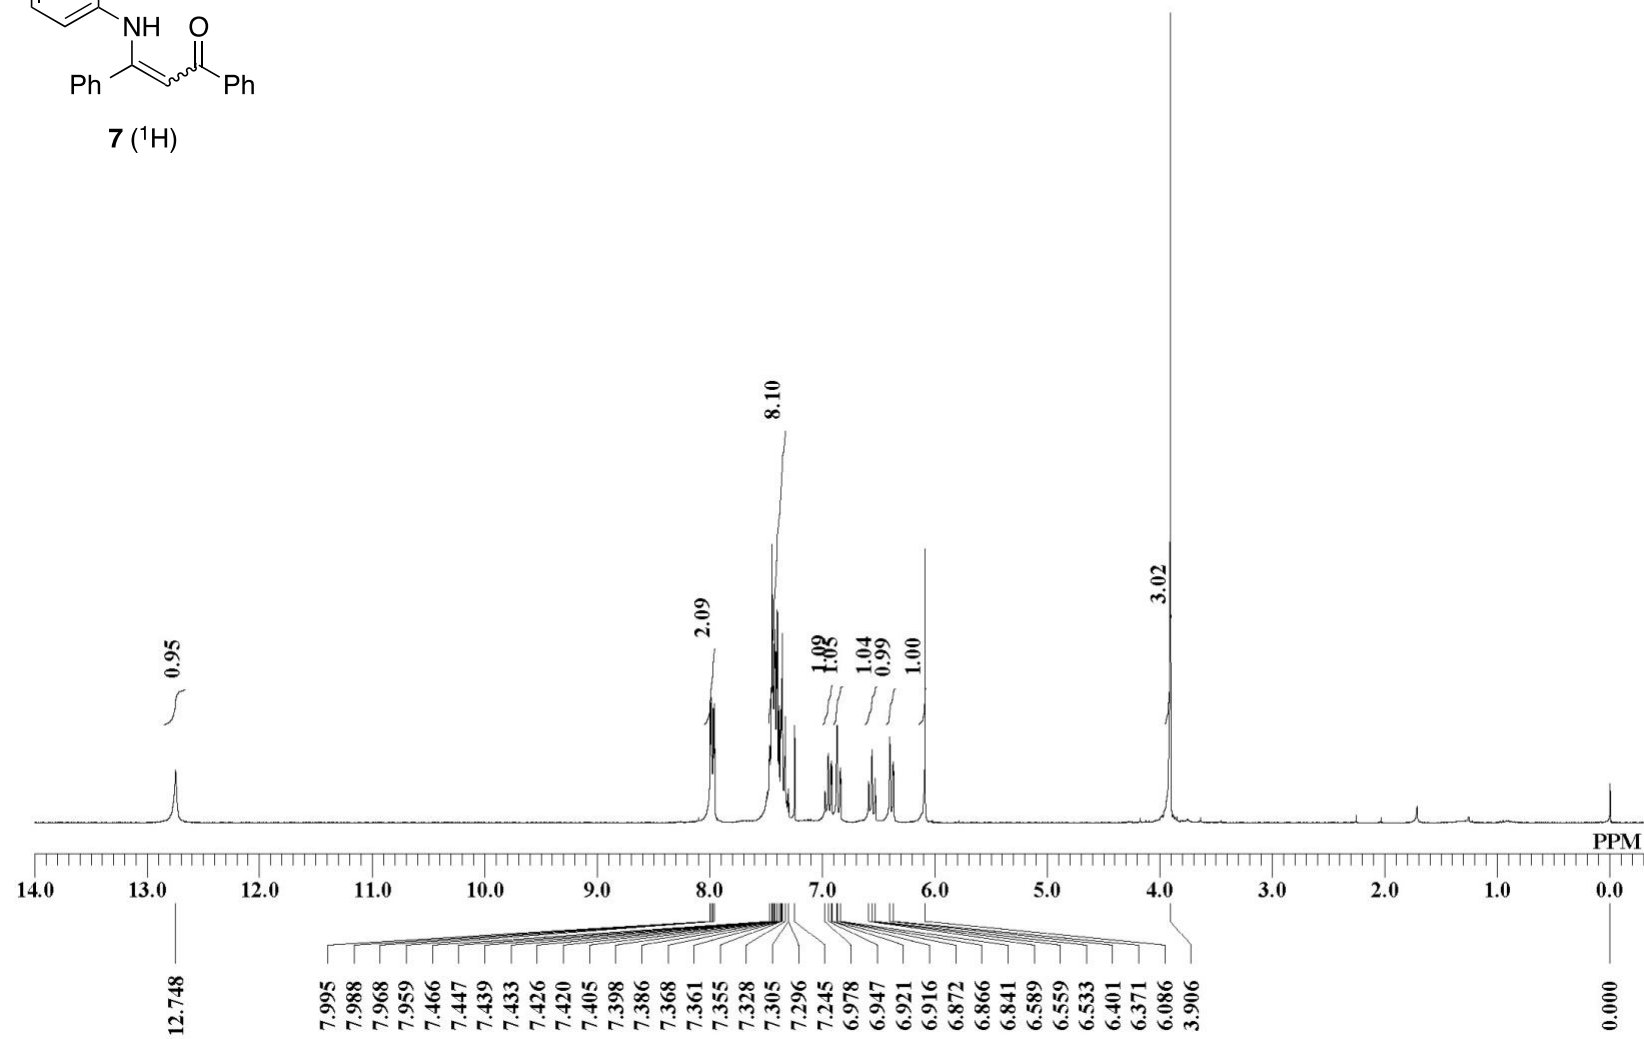

6KO-305 Fr  $^{13}\text{C}$

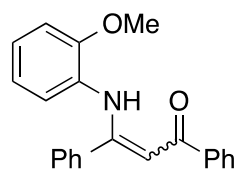

**7** ( $^{13}\text{C}$ )

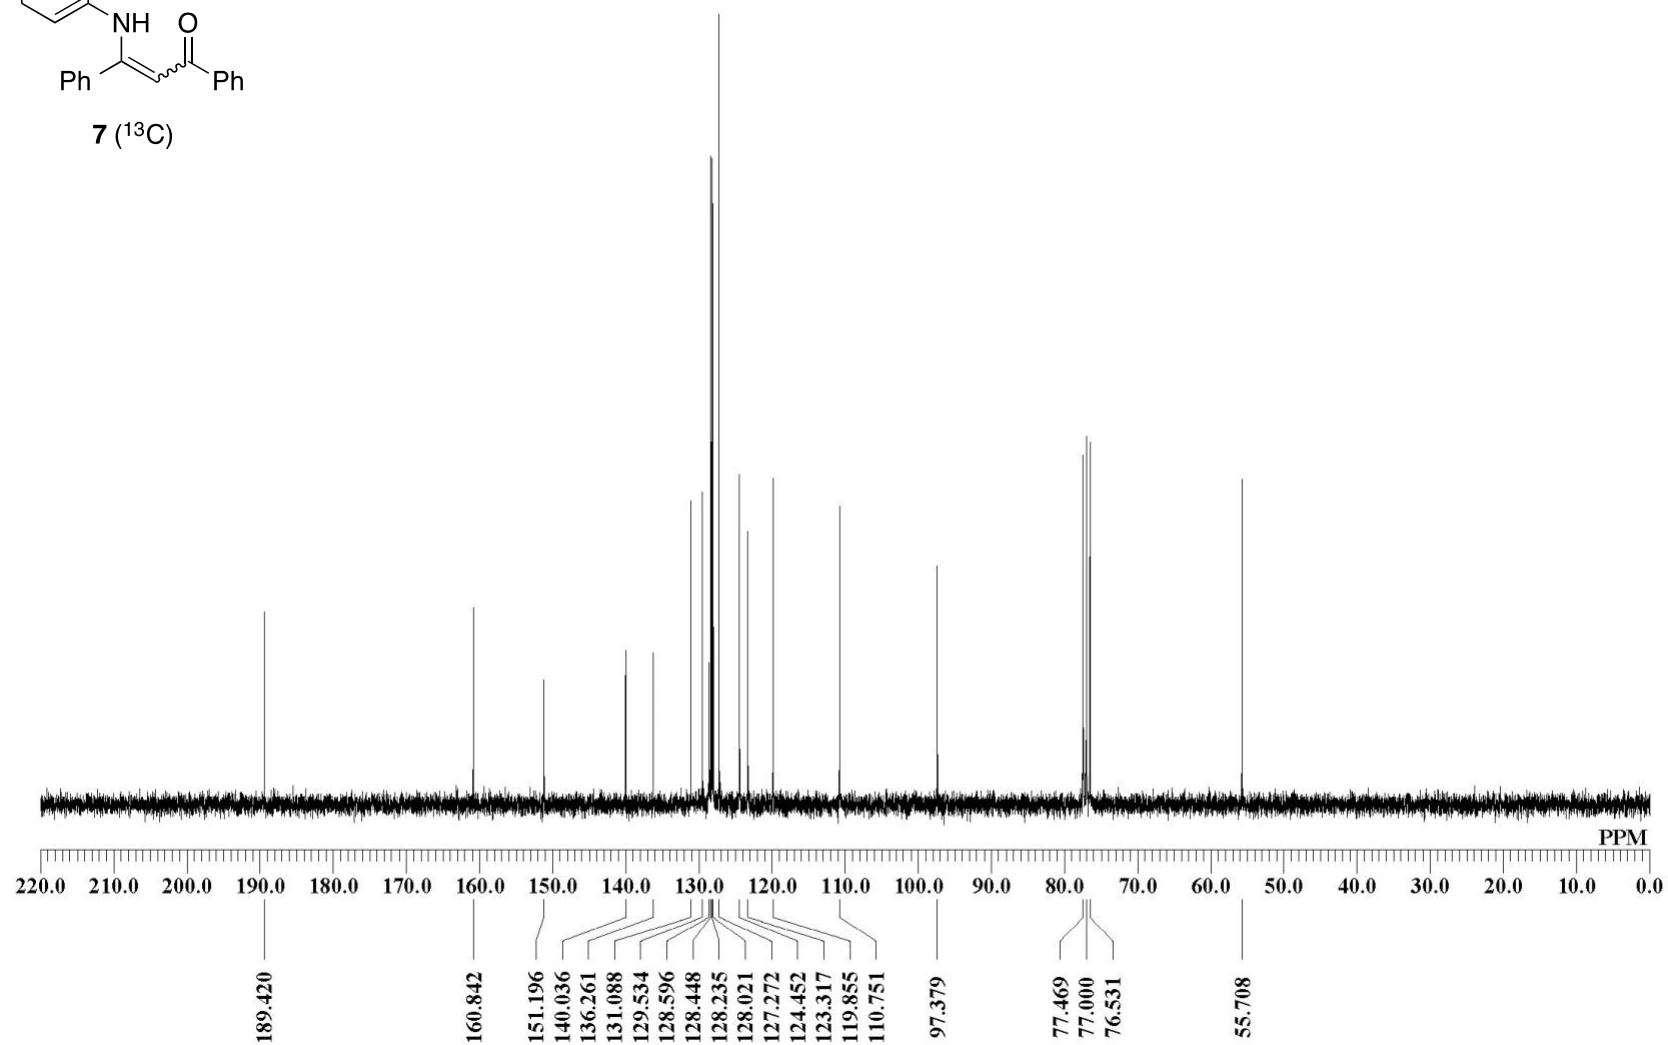

Supplement: c9ob00572b1.pdf [file c9ob00572b1.pdf]
